# Supplementary material for: Transcriptome analysis of substrate temperature effects on adventitious root formation in peach rootstocks
Source: PeerJ. 2025 Sep 5;13:e20015. doi: 10.7717/peerj.20015 (PMC12422280; doi:10.7717/peerj.20015)
Supplement: Supplemental Information 3 [file peerj-13-20015-s003.xlsx]

## Sheet: Table S2
Supplementary file 2. Expression matrix of read counts for each gene in the samples.
group	CT0			CT1			CT2			CT3			CT4			CT5			CT6			CT7			CT8			CT9			CT10			CT11			CT12			CT13			CT14			CT15
gene_id	CK1	CK2	CK3	T1_1	T1_2	T1_3	T2_1	T2_2	T2_3	T3_1	T3_2	T3_3	T4_1	T4_2	T4_3	T5_1	T5_2	T5_3	CK_14_1	CK_14_2	CK_14_3	T6_1	T6_2	T6_3	T7_1	T7_2	T7_3	T8_1	T8_2	T8_3	T9_1	T9_2	T9_3	CK_21_1	CK_21_2	CK_21_3	T10_1	T10_2	T10_3	T11_1	T11_2	T11_3	T12_1	T12_2	T12_3	T13_1	T13_2	T13_3	gene_name
novel.464	27686	38250	23045	52247	33530	38949	27273	25145	38038	29263	27264	28173	73339	62465	36335	47512	53228	97558	172115	186624	219259	140200	126420	98951	92080	40054	71355	70882	64964	79197	110234	103159	78366	104036	60724	37071	111872	65422	83266	122830	93021	145381	63168	64819	38339	40663	47198	67199	-
18779587	40107	34289	45210	77245	81221	91173	67125	74006	69568	109383	110276	114118	75261	48362	71081	71220	61522	77101	64041	57433	65749	44219	46338	36952	48779	45363	42044	44651	38760	49996	72575	68531	61151	42304	51193	41018	44844	58701	46991	68396	58885	62926	32777	34706	44598	41271	40322	39255	LOC18779587
18773913	61806	57898	61453	60457	56607	71075	65144	68585	67748	84435	58599	63434	51698	48046	46043	47461	41332	61186	52328	52419	60684	61603	66575	58807	54382	52861	49811	58039	51141	58872	58545	53408	50488	55395	66437	55324	65031	51912	48965	52900	51822	50228	49647	53000	43913	59875	59070	60190	LOC18773913
18781502	70634	73319	81157	54045	52909	23443	66790	62111	70623	68591	57840	62689	64247	58771	59859	64804	55577	71654	57404	54107	65087	57519	61621	60944	51403	53777	50669	59062	54043	55853	53605	51982	48705	58512	63342	54078	62235	55000	59161	56044	50210	48317	33010	44679	36241	39093	44647	42441	LOC18781502
18781475	30815	28205	28954	62019	55933	58419	56474	57698	62846	63074	47737	60423	39752	27121	34068	31868	27855	43768	63071	68081	79086	54790	57486	41022	37978	39945	36955	37684	32486	42722	64943	62252	49811	40866	51635	32989	54738	56342	51055	80800	85670	81238	94297	99865	92062	91011	97811	95517	LOC18781475
18776773	22931	21817	20047	86626	76668	92978	56396	68466	73322	65944	47027	56192	31200	22010	25760	34125	31042	42834	57395	63925	62890	47531	49390	38010	30853	33168	31917	47426	37951	48932	59854	62591	49755	42904	56661	40833	57484	68190	66503	78346	76286	63895	91827	112000	82773	72618	80477	77323	LOC18776773
18772546	15461	14852	11946	68370	63615	78995	48975	54756	58638	52748	36924	40751	31794	29454	33131	32042	29128	34904	55353	60725	63024	50572	54523	47631	37417	42698	39954	51851	42402	52010	49964	50938	42769	48402	63276	49585	63949	62047	63568	65959	68503	59142	59044	65887	53415	60716	63230	59666	LOC18772546
18789459	46788	50109	48107	37693	42710	50272	49243	38486	48287	65866	66209	63663	61410	53939	59970	45813	43578	47515	46800	44080	42703	49876	47989	53679	58179	51219	54542	57446	51453	51870	45489	46029	44067	48548	46048	44514	43111	43093	49806	42119	37122	41021	24567	27605	27217	22140	23843	22347	LOC18789459
18769018	269	257	284	107517	94151	94245	61696	95291	102757	72038	43603	55000	6530	3729	6680	7159	6354	21223	49429	64794	64185	48965	51830	38744	23925	20922	23138	12569	10483	17565	29304	29648	17451	38298	45805	26117	33351	47160	37508	61033	83049	71940	95717	60380	47584	84706	83864	88987	LOC18769018
18784393	32339	32464	34039	56924	49936	91745	44495	51875	53674	47158	34412	43302	25268	17963	21198	23957	19646	32309	47038	56582	63007	39758	41456	29296	25493	26709	23551	24967	21599	30144	46363	44764	34160	28818	33801	22732	36726	36584	32355	52395	53299	51035	58447	62414	61536	73752	73375	75854	LOC18784393
18773532	41952	43237	41701	33901	34561	43148	37605	28615	35983	44559	44509	43543	41572	35546	40892	31074	29780	32493	43547	40428	45910	47572	51902	47847	50639	48162	46921	51794	47666	50418	52358	51656	49079	52059	52057	43605	53095	44213	50304	42186	37899	44066	28511	29131	35964	21524	22954	22224	LOC18773532
18782286	41896	43956	43850	27985	31286	16932	52555	42767	47985	50110	46238	41429	69879	60299	62964	44257	46619	44274	31866	30275	34027	41900	38734	44585	38228	43653	39625	33250	30169	38102	33535	39957	31124	47261	67928	65206	49439	36091	35793	42820	37323	37429	22807	21250	20427	26507	27290	24453	LOC18782286
18792736	28468	29495	30715	52606	49448	79917	46252	47353	50612	57361	43826	55714	37310	26472	31458	39006	33724	50384	35337	40617	47157	32076	32792	24705	24516	23012	22496	23805	20876	26127	36114	35745	28135	22720	26562	18792	33113	26841	26512	36548	35775	35835	40888	45699	47890	58282	58407	59823	LOC18792736
18770520	949	1420	1423	16159	21652	11975	23192	15393	18780	39019	46836	41367	40631	40204	46329	27126	32747	27423	30211	21711	32839	41051	41742	47258	40626	48786	47154	46648	37059	44857	40834	39228	41979	35304	49319	48657	57924	47792	56399	58533	45470	52448	27505	37363	32281	37412	39311	39071	LOC18770520
18783530	3044	2881	3873	20481	21361	26170	48446	44753	44823	36708	24809	34578	35177	27816	23427	35243	32280	46355	29748	44334	44640	34527	36945	29930	24574	32675	27938	26004	21863	31428	38372	39411	33006	35376	50356	42093	59081	39457	35647	52778	52187	52146	40577	31311	32312	61129	58282	64627	LOC18783530
18790062	42949	44809	43819	58259	56789	57845	28090	23491	26756	29875	25875	24897	29366	34948	44133	33198	31227	21496	26285	19000	23922	29830	31010	43724	40974	37532	41690	44677	39892	37107	31503	29067	32682	24134	22830	28203	48234	49414	50453	50014	46863	36664	28128	48067	27747	20840	24248	19452	LOC18790062
18773012	33215	34794	34938	29205	31584	34864	33189	24274	31828	41479	48209	45636	45812	38333	46994	36987	33811	37468	33248	30603	35602	31851	32395	34850	38290	34755	37556	37144	34410	31483	32275	31537	29932	38057	28772	27532	35425	29075	37810	31146	29606	34162	23823	27468	27670	26776	29135	28072	LOC18773012
18788518	83237	71450	76500	32555	37957	26272	36896	26713	34694	39768	40905	39081	43522	41936	51792	37050	33388	32427	44885	36507	46800	33754	32983	41418	37740	35983	40352	40838	37220	32660	27202	26964	28713	36697	28685	31586	30858	27490	32707	18198	15428	19252	8752	9612	9870	7760	8420	7062	LOC18788518
18781341	35124	34349	35590	22615	23719	15888	52056	39437	47401	36362	33732	40846	47245	39901	37999	39068	34046	46728	28520	31333	33942	35131	35239	37137	31389	37311	31825	23376	24412	23153	27458	27881	29262	37285	51051	53712	41274	33807	32324	37210	29650	38281	17440	13418	13070	30701	31446	34284	LOC18781341
18783170	65686	47678	55895	80353	82571	85385	36224	25924	33889	36545	41085	45427	36300	38816	40562	28853	26254	29373	50409	47036	51899	27606	28841	35558	23626	25617	25838	35351	29994	30509	34813	34623	34720	17318	17804	23931	19448	42544	40125	20856	17355	16603	8998	11974	6036	4608	5819	4490	LOC18783170
18772872	25008	24083	25006	35669	34843	44416	31902	31718	36096	35794	29793	31520	29338	25983	30957	26515	27469	29836	33037	29714	37333	28375	29249	30650	26265	28758	29328	34765	28481	33429	31122	30934	30427	27050	35765	29653	43825	37084	38064	36554	29581	32295	28303	36892	30369	37558	38594	36613	LOC18772872
18774632	20333	18245	19702	38778	40268	18678	37380	33522	37472	52038	47685	51063	43291	34227	41911	34035	29601	37078	45190	41603	42342	35037	35582	34216	33260	30901	31914	30167	27485	30820	30745	28599	28423	32351	34243	29127	34963	34286	34305	32889	24787	33032	16994	17395	19559	13848	15187	14876	LOC18774632
18791668	40486	35868	36920	37272	35033	28394	44580	35623	44200	32500	27830	30256	30543	32584	34146	29701	26925	34589	31426	31060	44468	35452	41039	40400	33593	36530	32931	33798	31146	30069	28253	27261	27079	29901	33944	34425	41212	29076	29465	28653	26755	28399	16858	19662	13783	24091	24508	23344	LOC18791668
18774098	27740	25466	24792	41801	38014	70703	37710	37393	41021	48852	37914	48822	28656	19981	25895	24403	21738	33786	28526	31021	33120	24221	24784	19600	20014	20249	19259	19581	16407	20055	28241	26903	22787	18976	20287	14272	22037	25712	26110	32953	31806	32721	38373	46939	41607	44411	46509	44998	LOC18774098
18783479	1637	1638	1505	63872	54673	60872	41588	62056	69427	42978	25148	31478	8994	7082	8468	9988	9349	19434	31451	41786	45462	28915	31422	23128	18360	18501	17430	14381	12331	16618	28468	29831	17930	23686	30976	18153	35429	35999	29727	40844	54545	42772	45120	34072	25075	36863	37264	37609	LOC18783479
18777846	9536	9729	9747	62928	52451	50999	29663	36673	37610	30553	19074	22852	11437	7023	10009	12101	8264	14542	35750	43111	45761	33409	33029	21486	16570	13091	14179	15089	12587	18536	30489	29813	23448	25238	27558	15800	21150	26062	23858	45955	46832	43819	53318	52235	46901	55124	55263	55149	LOC18777846
18783672	46426	46405	45496	39041	37169	33372	30573	30419	33162	38608	35299	40318	29205	23181	26847	23309	21622	27494	28386	29070	31350	26104	27184	26006	22828	22145	22009	24760	21123	24289	29315	28611	27380	23905	28264	23266	34006	31462	29999	32063	30982	29728	20519	23909	21317	20165	21419	20203	LOC18783672
18769323	22506	20735	20766	33964	33649	36582	31408	32834	37172	27068	19867	22568	23790	22582	22908	23942	21402	28802	29056	28956	32745	32677	34183	28926	23974	25429	23778	29955	26303	30178	33635	32748	26805	31876	36638	28941	32454	32681	32068	33440	35486	28303	24251	26832	22405	24544	26138	23590	LOC18769323
18793644	111320	99760	107184	32145	31012	25409	18685	9078	14597	15285	17226	21310	19426	28004	42468	25900	25159	14362	16835	14828	22625	17302	20316	29397	36191	27957	35210	39551	31673	28482	19048	18846	32205	19553	9586	12025	30105	32097	39052	20098	13278	20803	11278	32902	6267	12403	16376	9646	LOC18793644
18787438	12284	11745	12567	27194	24628	19733	21662	21791	23249	26046	20289	24788	18598	12694	16365	19165	17349	25189	22789	24708	28126	19896	19412	15459	13462	14300	13613	14023	11840	16217	27009	26363	20296	13308	17266	12441	22231	20681	19649	36462	33561	34105	47782	60345	54581	75558	76846	77291	LOC18787438
18779782	17563	19492	19334	36804	33348	45343	19787	21711	23093	21243	16018	17828	11781	9868	11448	11624	9275	14570	34895	39142	51947	23302	22697	19359	12898	12714	12272	15154	12847	16149	26322	27039	20841	19968	20741	15149	30254	24704	23910	41293	46016	39395	44459	51971	41149	40935	43485	43354	LOC18779782
109950660	12183	10259	12908	25925	23344	9721	18984	17232	20063	17185	17164	23081	18974	18787	18986	23023	16577	26260	25715	27156	36088	20467	24043	18876	18040	16525	14927	19153	17429	19979	25418	26960	21879	19509	18229	16056	33438	25563	25422	34117	33854	31592	40359	51003	39639	62593	63656	66058	LOC109950660
18778536	5762	5270	5439	35894	32717	13258	23314	28609	30576	28199	20892	25585	14594	10953	13162	13439	11167	15752	29118	28769	35429	25688	29483	22211	18855	18280	16969	21542	17811	22894	28727	29415	24876	25290	28119	20897	24536	31473	28961	42299	39471	36296	37819	45568	33360	40583	43018	41387	LOC18778536
18785995	8883	8689	8646	20547	20435	20606	19915	19459	22515	22402	17152	21981	16543	12647	15419	15331	15435	18933	19973	20759	22611	19733	22197	19340	18122	20316	18651	24032	19952	23308	22652	24909	20260	24295	29015	24700	38099	32689	35067	38852	34493	34031	38122	49642	43807	50643	51194	53323	LOC18785995
18770752	26944	30065	27349	52542	46258	81224	41067	46142	48589	41461	24741	32090	16334	13426	13311	13870	10767	17239	29177	30760	32358	21530	21046	16056	14012	14480	13622	15449	12855	16586	23706	22104	20470	19573	23804	16324	21021	20331	19237	21605	21142	18156	19419	21774	17822	19672	21158	20836	LOC18770752
18781677	22662	25086	22736	23171	22200	25404	29915	26594	29516	29925	25738	37738	20034	12840	16886	14177	16927	21558	16341	20085	23355	17933	20767	18576	15916	18313	15619	17667	13334	14399	19611	20988	21189	26233	27096	27554	34754	30943	31221	39920	34101	34130	28572	32821	30030	32820	34667	34847	LOC18781677
18770067	25558	28679	26701	16291	18456	9891	25846	14891	21862	24430	30088	27209	34360	34297	40367	35128	31047	32223	21898	16894	16690	24942	28671	31482	30329	29179	30656	32304	30018	26555	22433	24080	24545	33032	25335	26847	22327	23169	30084	16447	16482	15144	10146	11035	13153	7456	8952	7645	LOC18770067
18784160	20725	14960	16826	83811	76419	125582	37191	45266	42057	44617	30503	43100	18064	15015	16876	14850	13011	18862	36660	44572	35031	23747	21653	22460	10655	14431	12385	15164	12193	15517	16993	14532	16097	9008	9614	9500	6008	16183	15209	5941	5491	5103	1520	2324	884	1430	1315	904	LOC18784160
18767091	25483	25514	24347	19384	19558	14221	25515	20294	25477	29599	30598	29061	32929	32752	33627	30144	26440	29608	19070	16320	19458	26723	26102	26450	25111	23774	25882	28450	25623	26682	24953	23710	23450	21859	19755	18083	22914	17749	20601	17586	14340	16299	9509	10801	9812	9519	10789	9784	LOC18767091
18772756	42285	46322	48562	13215	15543	6910	20530	12208	17388	21926	22891	21437	22164	20860	22976	17811	17367	18245	19756	18518	17261	24720	27272	28708	32711	29357	31533	32427	31836	29355	25936	26214	25232	26871	24853	23223	17954	19443	24606	16635	14956	17632	10473	9714	14575	8609	9979	8904	LOC18772756
18767741	22495	21559	23192	35982	34276	34700	23209	23007	26145	33072	28576	34634	17592	12384	16064	12311	11192	16330	30712	30302	35955	20703	21294	17041	16759	16729	16506	14956	12447	14349	20872	19662	17113	15718	17009	12166	18536	21081	20892	23887	22702	22833	21554	24441	20977	24883	26484	25357	LOC18767741
18785283	31966	33038	31897	20137	18853	21811	19974	17555	20821	23669	20787	20527	22710	20312	21354	19547	18788	23383	19427	18290	21490	22510	24737	22393	19423	20460	19047	22751	20877	22281	22938	22218	20553	23811	29432	22799	30173	21319	22557	21115	19284	20725	13693	14188	17444	12528	13549	12535	LOC18785283
18789808	2102	2434	2476	10442	10902	4978	20800	14798	18895	14956	17279	15939	20683	20109	23252	20784	20837	19678	14121	14351	16666	21012	23856	24992	21850	21870	21425	19691	16153	16338	19414	19667	18821	17505	24267	22156	44319	32107	32070	40224	37750	42331	22717	27570	19886	34596	36668	33353	LOC18789808
18774233	1336	1916	1253	8094	7353	19632	18381	21967	28140	12074	5636	4621	5735	6788	6785	10378	10476	10892	5481	5646	6709	15965	17383	12511	16894	19715	18540	32695	27374	31687	22093	20866	18311	28082	33074	23521	31802	27232	32360	32244	36219	26311	42501	55976	35241	50489	54470	53190	LOC18774233
18769171	23208	19243	21869	30970	33377	32824	24555	24315	27447	20998	17926	18430	13712	16974	15294	12884	11428	14830	17091	18867	18086	23338	28063	18907	20328	23128	16764	22809	20539	27172	29215	27948	22898	16285	16789	17708	13021	23691	19248	27502	28536	28746	17148	13426	14963	17094	15008	14813	LOC18769171
18779708	21772	21329	21366	23572	23188	22592	21546	18854	21877	22260	21254	22637	22121	18856	21277	20640	18411	21871	23111	23293	27394	22367	23148	20427	19808	18828	19437	19795	17602	18739	21824	20224	19037	20656	21779	18292	24783	20902	21778	22692	22586	21864	17429	17852	17199	17085	16812	16492	LOC18779708
18791163	9605	16248	11781	40033	46862	22298	33012	26877	33637	28777	25526	16706	29912	55452	51260	39082	34413	17673	23200	13478	13690	19528	22164	25636	13957	16709	17508	35518	32878	41608	18453	16520	19648	10803	11384	14194	8215	15134	17724	5732	5476	6405	6014	8573	7249	3119	4490	2931	LOC18791163
18788323	11158	9542	10013	24760	23920	32646	20845	21198	24309	19073	15126	17258	12755	9876	11778	11776	10555	14255	22195	24129	29615	18666	19429	15339	15087	14610	13884	14932	12935	16276	22865	21479	17343	18006	21548	15009	23901	20626	19546	27201	31742	27971	30152	30409	30261	32044	33283	32462	LOC18788323
18771167	20542	17019	19760	15963	16505	2439	16546	13794	17397	16269	15942	21554	15904	11557	16907	14970	13719	17488	22115	21527	24537	19127	23652	15819	15623	14274	15247	19376	16790	18585	18572	19553	15664	20058	21954	15418	19404	19345	19446	21446	21480	18206	22682	27846	27201	44896	43792	46158	LOC18771167
18780651	19915	17785	16943	26432	24659	38074	21263	20629	24328	23510	19039	22665	15310	11925	13965	14393	12576	18481	24099	26388	27841	16950	17410	14128	13235	13327	12579	14107	12173	14811	20485	20442	15044	15386	16022	11903	15135	16059	16059	20623	22123	20336	25475	27836	26632	30016	32066	31893	LOC18780651
18793654	23918	24495	22603	16025	16339	16839	21722	15153	20668	23134	25441	23594	27364	26766	29119	26889	23636	26641	19003	15712	15720	22588	24178	23523	22743	21896	22557	23080	21431	22342	20957	20634	19015	23668	20852	18081	16856	16825	21091	15580	14819	15195	9431	9290	10792	8337	9139	8893	LOC18793654
18792825	12490	13443	12440	36859	33206	71100	29325	35884	38478	40199	27111	29366	11171	8537	10062	12667	10655	13384	19602	22213	22692	16408	16962	13437	15825	13885	13786	13183	11253	14490	17169	20151	12914	16486	22716	18092	17457	19689	17282	18489	19020	19404	15850	15246	11070	10435	12547	11621	LOC18792825
18774130	17005	17420	17559	19899	19015	42014	21770	19956	21916	23544	19508	21056	19853	16763	17238	17337	15978	20503	20026	19291	22151	20742	20911	19627	16363	17400	16619	18450	16467	18759	20189	18820	16818	18195	21797	17870	24891	19842	19898	21366	21317	20476	16375	16930	15886	16816	16580	16347	LOC18774130
18793735	1408	1580	1554	22011	21348	24826	13217	13489	14287	17675	18121	19483	11958	8099	12060	10291	9987	11761	22442	23941	26271	14386	14810	14179	13095	13462	13201	11456	8914	11725	16303	17698	13891	14444	19554	15928	23419	24689	24374	35973	39745	34636	38445	35107	35630	35249	36122	36673	LOC18793735
18774692	1225	813	870	7878	8796	9287	20603	18972	20080	14303	14374	14050	16846	15472	17346	18072	17329	17688	14212	13028	14524	20859	21106	21482	19054	21099	20389	23115	19184	19822	17870	19201	18962	19854	27441	27215	24617	25555	27087	33220	31600	25645	21038	31605	21086	23683	25991	26246	LOC18774692
18785063	3637	2225	3045	20164	22124	10019	18782	14984	18272	23680	25970	26459	19745	19663	20693	15020	14016	17231	26583	23295	29985	22479	24578	22883	17082	20279	17883	20033	17571	19843	26098	23824	23284	15544	17940	17792	26801	28840	28954	24959	25318	25541	14041	14298	11744	8435	9532	8165	LOC18785063
18785337	20349	22349	20112	8187	8133	7742	13960	10627	13080	7927	7132	6900	12953	15665	15894	17233	15891	15726	11816	12207	12934	18785	18063	21134	15914	18923	18518	24182	20644	20773	14671	17077	16554	18587	22108	26118	25529	24954	28812	33957	32755	22979	21796	36721	21021	26547	31238	32929	LOC18785337
18791851	14916	12741	12629	17292	17243	25299	18083	16693	19656	22438	17522	21509	17687	13212	15773	15928	16242	19660	15455	15753	20504	14611	17267	14302	13865	14914	13900	17760	14346	17266	18284	18118	16985	18771	18870	15512	25169	22207	23660	26689	26679	25015	27257	31810	27055	18213	20428	20467	LOC18791851
18771153	37006	32042	34186	20176	23634	21621	19167	13562	17850	23434	25102	24055	23213	21696	26283	19051	17185	18203	30846	24290	36126	17632	17076	20201	18778	17773	20215	20349	18634	17726	15963	15436	15197	18583	15819	15473	19109	15418	18873	11370	10280	11308	6725	7508	7835	6339	6763	6183	LOC18771153
18791510	17040	15939	14754	16488	17135	19786	18003	15731	18254	21053	18131	21060	19978	16223	18741	18794	19418	22394	15781	16102	18960	16711	18656	16895	14955	17347	15978	19339	16224	18248	18387	17963	16696	20019	20053	17148	22962	21610	22031	22886	23133	21181	21364	22289	22180	15544	16980	16679	LOC18791510
18784812	24842	26860	26899	16484	18282	10586	18235	14185	18152	20548	20259	19688	21883	20678	23464	19615	17509	18740	19733	18728	19617	19338	19995	19415	21197	18396	19665	20984	19193	19398	18032	17150	16253	21403	18586	16185	19889	17660	21732	16962	15673	17258	12292	11872	11739	11632	11474	11057	LOC18784812
18770476	12434	12845	14223	26015	25475	11081	23342	24905	26668	23250	18203	22390	17777	15864	16219	15040	13174	19559	22333	23374	28006	16392	18433	15944	14768	15811	14213	17495	16115	17454	21347	20661	18751	15153	18513	16377	21327	19633	17998	15975	15141	14519	14495	16937	13790	18181	18816	17953	LOC18770476
18782751	16475	16943	17405	19568	20700	13558	22381	19246	21895	21268	18226	19149	24062	23114	21976	22089	19658	23625	21422	18135	18890	19018	19481	22002	17722	18265	18489	23468	21457	20885	18759	16968	17144	20499	19351	17718	17131	20366	22352	13438	13742	13524	8196	9637	10160	8407	8280	8393	LOC18782751
18773046	12152	11637	12769	28961	26497	31428	21692	24378	25702	26187	17413	23546	10578	7667	9105	10386	8333	13830	19837	21797	26082	15923	17147	13279	11403	11399	10430	11112	9830	11900	16798	16645	12980	12198	14102	10350	14640	15797	14713	19526	21983	19291	25123	24572	23782	26714	25713	27096	LOC18773046
18789641	3804	3290	3852	29868	26947	27105	23661	27243	28221	28838	23625	30645	13087	9659	11131	13600	11126	15806	20432	21535	21059	16078	16432	14521	14045	14372	14002	14094	12015	13780	18641	17431	16724	18335	21979	16893	15738	18544	17056	19415	18212	18491	13683	16023	12462	15314	16273	15553	LOC18789641
18772495	20241	21935	20331	22099	21690	34581	19832	19759	22297	25555	22206	22967	19914	16326	17886	17732	16226	20992	16606	16890	18067	16294	16591	13814	13393	12785	12501	14011	12296	14186	17168	16191	14798	14486	15352	12103	14074	15049	14385	16281	16998	16395	13221	13936	14856	13284	14463	13911	LOC18772495
18774952	12341	13160	12927	13680	15259	9833	17589	13363	16804	20529	19571	20074	23502	21513	24368	19024	17865	20372	17031	15106	16914	18080	18459	20963	20238	19553	20097	20374	18621	18583	17918	17397	16792	20003	17981	17626	20472	17739	19859	14886	14515	15734	10941	10274	12184	11380	11044	11167	LOC18774952
18767142	9717	9802	9546	17799	16743	22072	23818	23358	24876	26686	19702	21959	18659	16983	16911	18544	16046	20729	17065	16430	16973	17880	19394	18470	15887	17183	16053	17568	16413	17913	16064	15528	14348	16840	19472	16129	15612	16980	17063	16710	16715	15317	11716	12540	11885	11167	12183	11944	LOC18767142
18771939	17671	16980	17445	14268	15030	14132	17847	11651	15966	16463	18615	17176	21459	19847	22724	18154	16397	18008	17065	14665	17973	18412	18271	21926	19283	19017	19348	22588	20413	19235	18343	19272	18653	17536	17699	17504	22487	17442	20221	15539	15177	14242	9470	12533	9683	7878	8670	7743	LOC18771939
18768414	16529	17738	17553	14842	16645	10479	18091	13765	17598	22905	24505	23262	22296	19792	22530	17235	15424	17986	17899	16147	18008	16932	17365	18319	20971	18477	19368	19233	17539	17192	16840	17174	16231	17659	15293	15195	18834	14864	17800	15490	13932	15889	9352	10923	11296	11431	11454	11189	LOC18768414
18786946	23336	22566	21468	16278	16219	16370	16371	13179	16546	16909	15727	17292	18109	15755	18175	16641	16637	19100	16437	15778	17545	15634	16952	16644	15404	16126	16073	18236	15909	16107	16313	16500	14770	19011	17556	14868	19239	17380	19356	15970	16149	16011	15314	16512	15972	13806	14202	14058	LOC18786946
18781773	16326	13722	14029	15414	15193	25040	15459	14188	16288	18007	13923	16899	15556	12373	13755	15269	15551	18533	13972	14361	17020	14228	17254	13484	12228	13956	12055	15744	12786	15314	15989	14831	13848	18663	18416	14779	20658	19650	20241	20644	20975	19132	19101	19831	21358	13269	14026	14498	LOC18781773
18789573	11811	14087	13813	25956	23692	28889	26377	29849	37128	28234	18470	21313	11487	9691	10343	12314	11000	14126	14210	14392	14880	14530	15104	13478	13678	13197	12886	13494	12067	12668	13186	13293	11424	17140	19561	15259	11811	13427	13210	14395	13780	12619	10842	12209	10366	14150	15117	14501	LOC18789573
18774532	16830	16035	15493	12401	12887	13203	16017	13866	16014	18182	15167	17834	18472	14794	15899	15349	16927	20708	11709	11226	12880	14519	17528	15443	13681	15604	13532	17238	14776	17331	17846	16719	15046	18574	19017	16694	19878	18485	18630	18555	18690	17493	14853	14946	16547	11079	12264	12160	LOC18774532
18772051	12088	11332	11349	14923	14625	13145	16729	16997	18376	16992	14237	16123	12596	11366	12127	12559	11093	15856	15952	17150	19484	15576	16865	14086	13096	13629	12487	13888	12182	14446	16904	16973	13582	14589	16676	13415	21265	16010	15769	18857	20775	19360	19967	20809	19541	19195	19920	20179	LOC18772051
18788338	4981	2864	3580	17539	18164	17674	17910	18391	18255	21680	16839	20554	20985	16043	19004	18553	17777	21202	19735	21044	19672	15629	16081	16565	13949	15577	15495	18622	14591	17077	17393	16963	18669	12561	15291	13960	14068	18617	18286	15148	12891	13805	10309	14715	10668	11652	12177	11060	LOC18788338
18790877	2793	2520	2732	10285	10681	13271	17654	16158	16238	25451	21199	24798	19797	15652	17105	17028	15940	22040	15802	15789	18245	16642	18678	16240	16021	16104	16269	15701	13293	15438	18137	16544	15772	15855	18597	13885	15957	14637	14732	18688	18784	17676	12643	11095	12356	15491	15590	15687	LOC18790877
18793474	12319	8850	9305	42767	38143	52313	19806	22150	25649	15892	12480	15631	9332	6797	8387	10373	8953	12742	21850	25593	24230	14717	15305	10667	9477	9447	8817	9730	7832	11395	17046	15947	13867	11481	12272	9535	8844	14432	13112	15042	16183	15017	14713	13344	13616	12575	14956	14348	LOC18793474
18783397	8553	8332	7823	15184	15630	22010	17030	15173	18347	16461	14334	14805	16033	14728	16930	15663	14726	16947	16079	14988	18960	16751	17381	16728	15015	16409	14894	17575	15089	16477	16172	15153	14411	16039	16897	14098	19020	15721	16463	15953	15961	14957	11872	13251	12567	11591	12337	11443	LOC18783397
18769295	19551	18656	19654	12875	15099	9448	15723	11256	14757	16698	17839	17581	21473	21569	23957	17986	16922	17869	17281	14610	17643	15857	15840	18627	17379	15844	17669	20380	18714	18190	15015	15144	14541	16427	13645	14722	13630	14250	16731	11710	10634	11604	7345	8238	7785	6582	7219	6442	LOC18769295
18768211	12008	12545	13915	16415	17056	12081	17995	14769	17562	20804	20323	21703	17634	15782	17579	14598	11708	15565	17663	17835	19171	15543	15771	15206	16987	15901	15042	16207	14945	14920	14984	14947	13131	15216	12741	12861	12971	12801	14632	14018	12952	14789	9399	10404	9937	11980	12321	12464	LOC18768211
18778663	2231	1111	1730	13343	14213	3320	17609	12273	16136	17512	20599	21342	19904	18982	24016	19034	18040	19578	16829	15538	16585	16576	20162	16450	18715	15939	17114	15604	14505	13987	20005	18757	19395	15885	12812	11815	9997	17353	17519	14253	17128	15462	11622	11941	7369	5649	7715	5338	LOC18778663
18790321	14462	15141	15105	14166	14731	10570	16156	13837	16566	16875	17594	18379	17149	14401	17106	15996	13409	16525	15366	15667	17600	15054	14994	14770	15282	15237	15815	15486	13293	14241	15671	15442	13396	15155	14788	11971	15205	13321	15530	13503	13011	13647	10680	11102	11293	10362	11275	10759	LOC18790321
18772877	7983	6702	7401	23463	21932	14596	17998	21674	23185	16202	11391	13798	8247	6967	7686	9563	7912	13320	17455	19543	24733	12757	14218	11205	9142	11597	9620	10089	8706	11039	14408	14137	11490	12364	16315	13570	19786	16164	14432	18394	20702	16603	16508	15980	14211	18566	18676	19233	LOC18772877
18784897	14114	13087	13067	17681	18081	18228	13295	12592	14293	19168	18270	20531	13752	10373	12559	10292	9447	12606	16658	16764	19717	14246	14757	11589	12816	11891	11316	12309	10751	12802	15983	15373	13574	12402	12217	9236	14897	13763	13941	16404	15713	16996	14897	15246	15416	15773	15933	15222	LOC18784897
18783631	8884	8845	7846	14516	13719	35482	16340	17359	17449	17550	12883	14036	10950	9731	10469	11089	8983	10559	14345	14766	18045	13984	15167	13983	12309	13596	12485	15738	14054	14935	14391	13691	12754	13323	16895	13524	19252	16707	16942	17019	18430	15816	13417	18180	12493	11597	13177	11367	LOC18783631
18768028	7379	7113	6997	11284	11119	10153	10802	10201	12208	12621	10614	11560	11399	9387	10371	8727	9299	11689	12639	12484	14133	12346	13425	11783	10099	11196	11208	12468	10249	12255	13753	13321	11661	14525	17658	13056	20163	16338	17698	20983	20117	18841	19829	21538	20301	28917	29842	30682	LOC18768028
18792180	2183	2015	2171	13383	12795	16299	13356	11742	11785	21892	19334	25904	14554	9655	9167	11139	10422	17208	18300	17940	18390	16591	18267	11913	12968	11433	10266	9066	8697	10299	16785	16783	12278	13824	13907	9334	6619	12938	11144	21540	27168	20545	19149	10171	15457	13445	13123	14109	LOC18792180
18767792	11237	11267	12053	28267	22847	11121	9839	12041	14411	10237	9079	10108	6171	4851	6366	7020	5971	8317	14448	17024	19179	10524	11082	8535	5445	5209	5198	5763	4934	5737	9150	10507	7082	9091	9748	7379	15317	14741	14145	20636	23291	19126	23409	22835	20179	36451	37128	39063	LOC18767792
18788092	17059	20789	19554	9695	10864	8628	12749	8161	11085	14874	18033	16580	17036	17019	19075	17443	15284	16035	14906	11411	12379	12682	13944	14415	13899	13198	13515	15371	14108	13567	11653	11431	11533	14589	13015	11155	16007	13477	16415	12421	13312	11965	12537	12887	14666	7018	8196	7197	LOC18788092
18786295	10116	10733	10451	17831	17213	29779	14328	15852	16302	17935	13511	15272	11793	9295	10372	10581	10179	12502	11971	13311	14613	11246	10929	9958	9775	9240	9044	10355	8691	10756	10980	10574	9272	11687	13884	10539	15453	12410	12515	16321	15976	15464	15245	17649	17972	19614	20209	20336	LOC18786295
18788358	11970	12564	12179	13402	13954	15461	14709	12106	14453	16597	15721	15111	18558	18709	19503	17140	14972	15856	14805	13389	13334	14937	15261	16889	15311	14671	15756	17452	15721	15903	12629	12408	11936	16476	13987	12943	11952	12169	14975	10258	9317	9800	6052	6815	6605	5293	5920	5661	LOC18788358
18778161	3857	3129	3222	23203	21890	19824	14815	16461	17366	10694	8072	10062	6599	5417	5482	4509	4416	7661	14255	16230	19609	13671	15943	12527	8941	11482	8319	9469	8503	9116	15754	15775	12684	14409	16777	17302	25322	19985	17349	18569	23591	20448	14643	12525	11061	15962	14953	14803	LOC18778161
18782384	13356	10725	11972	7623	8333	6558	11707	8216	10122	8865	9426	9288	13924	13802	15838	12132	11901	12914	9602	8210	10101	11859	12411	15927	9029	11837	11308	18326	16025	14959	13848	14528	15715	10720	14153	16315	18926	21704	23808	22657	19763	15693	11017	26695	9445	12065	13037	9938	LOC18782384
18767223	12629	11347	10284	18236	19556	22652	10816	11285	12900	12071	9743	9817	7602	6691	8284	8346	7362	8459	26210	23541	32228	11423	11891	10971	7982	8269	8454	12848	10405	11729	10590	11338	9351	11464	12658	10157	13278	13299	13465	14938	15368	11954	16625	20515	14100	17586	17919	16172	LOC18767223
109948297	226	274	404	15063	20181	13647	9779	7092	8203	10416	13136	13277	16934	15085	18866	12222	11373	11300	12411	12516	12828	13720	12054	21943	14237	17231	17565	26266	19495	18504	16245	18059	20974	8718	8366	13173	11498	23138	22852	25243	17230	11320	4916	17651	2665	5536	5484	4718	LOC109948297
18780194	12704	11365	11120	14604	14537	26515	15087	16020	17620	17235	13429	14543	11981	10204	10618	11218	9772	12997	11383	11105	13096	12648	14591	12156	11207	11889	10810	12469	10862	12406	13905	13005	11669	12075	14719	11395	16403	12582	12491	15123	14784	13829	12047	13054	11516	12437	13123	13073	LOC18780194
18776953	14483	15264	15390	10591	11690	4802	13198	9842	13211	15412	16198	16636	16757	15315	17023	13651	12535	15052	13359	12586	15421	12871	14443	13952	15261	14133	13847	14955	13993	14158	13574	13576	12651	13718	12000	12344	18288	12401	13808	12127	10511	12411	8100	8565	9055	8821	9163	8701	LOC18776953
18788559	130	128	116	15426	13068	17392	13909	21612	25158	28278	18039	26183	2847	1098	2422	3217	2664	9513	17583	23498	23752	14648	14438	11906	8535	5477	7963	3306	2505	3479	4318	5709	2692	9241	11039	6328	11146	15048	12105	22032	25153	25416	29228	17005	13179	24511	25704	26176	LOC18788559
18782110	12282	13799	13134	15533	15118	15761	12343	11030	12966	16137	15690	15887	13353	11298	13133	10974	10012	11335	12550	12925	14398	13407	12719	12983	13000	11662	12474	12156	10503	10736	13061	12846	12086	12525	13277	11536	14945	12612	13324	15741	14933	15513	10994	11682	12517	11947	12491	12125	LOC18782110
18792916	15433	15306	15102	15941	15208	23924	13872	12658	14614	16790	15147	15632	14132	11673	13342	11760	10581	12069	14300	13777	15945	13706	13495	12581	12652	11608	12393	12882	11383	12087	13517	12865	11951	11880	12320	9862	13125	11091	11851	12075	11510	12419	8930	9413	10261	8491	9483	8753	LOC18792916
18768509	16417	19400	18718	7970	9331	2998	13305	7875	10956	13415	16915	17063	20948	18833	21687	19230	16072	18424	10705	9738	11858	12349	13999	14304	14007	13583	14549	14292	12736	10787	13332	12846	12095	13409	11233	9586	15709	13146	16537	11488	12587	12126	7675	8583	6423	4546	5583	4587	LOC18768509
18785293	9891	10508	9663	8712	9972	6809	13300	8829	10974	10522	12575	12712	16590	18823	20155	16172	15691	15020	11907	10583	12127	17421	16708	20695	14865	17887	16816	19481	17088	18425	11545	11369	12172	12119	14063	18346	13422	13006	14281	11943	8808	9695	4519	6441	4611	7433	7873	8621	LOC18785293
18789381	11420	13701	13620	9439	11080	2132	14871	7940	12614	14574	17927	18121	17011	15448	17814	12513	11164	12808	13755	11877	13274	14381	16511	17725	18045	15841	16928	17142	15698	14178	14613	15382	15461	14125	11876	11673	14751	13332	17611	8799	9125	9967	6330	7243	6918	4124	4676	4162	LOC18789381
18772511	22223	26557	25034	19123	20538	17100	8262	7984	9956	15058	14121	15780	8887	7412	10452	7112	7045	6414	14974	13997	14889	8074	9025	9589	9737	9574	10153	13044	10799	10934	10379	12509	9805	9783	10277	8664	16079	15920	16449	12312	11395	11269	15123	14854	16381	9542	10397	8856	LOC18772511
18790130	11478	11550	11610	21299	20025	21849	15053	13792	16125	17727	16946	18661	12260	10472	12613	9413	7914	10246	14869	14818	17842	12500	12311	11408	12352	10884	11174	11022	9856	10147	11835	11624	11020	10790	9334	8276	10599	9027	10789	11938	10896	12772	9731	11423	10227	10890	12556	11753	LOC18790130
18770310	10767	10328	10197	16162	15020	24334	15775	16956	18435	17517	11589	14939	10774	9328	9374	9571	9754	12877	12154	13319	12381	11950	13333	10906	9262	10667	9682	10032	8282	11208	11320	10939	8247	13119	15233	11603	9115	12501	11526	14566	14156	14253	13291	11165	12779	13836	13824	13828	LOC18770310
18789797	18858	17671	17484	13584	13548	18626	15121	13289	14930	15290	13995	15204	16263	13499	13730	13015	11676	15263	12964	12944	13634	13692	13646	13342	12822	12565	12136	12604	11682	12678	12711	11950	11783	12488	12677	11949	11525	10692	10670	9831	9485	9807	5579	5801	6161	7270	7300	7101	LOC18789797
18781284	84	66	72	6874	6808	5796	5909	3872	5570	9541	8906	11749	7254	10407	13745	11243	12653	8684	8751	6731	9825	7279	9162	12832	9558	11662	13168	17411	13923	11482	9163	10435	10708	8555	7526	7740	20066	20038	24158	31623	23615	18433	16778	41463	13654	21590	23427	18671	LOC18781284
18776048	22121	22001	20784	17096	14789	30221	22972	25026	23427	19052	9549	12294	13689	11040	10030	10714	9158	16168	7314	9340	8011	13668	14326	9636	7583	8859	7725	10721	8908	12137	16565	12638	14085	9793	9609	6026	7961	8798	7545	8141	8520	7199	7798	7014	6779	6080	6751	6492	LOC18776048
18777915	10772	11879	11461	14729	14891	11146	11979	11521	13356	14022	12279	13245	11146	10751	12373	9974	9548	10055	14643	14306	17479	12066	13532	12197	11923	11749	12126	13036	11394	11850	12025	11965	10759	13950	12754	11105	15169	13225	14814	12659	13016	12598	10152	9931	9034	10286	10215	10290	LOC18777915
18779311	7856	8071	6940	8418	8843	9868	14145	13859	14444	12345	9083	9896	13085	12493	12908	12667	12295	13680	9188	8819	9612	12153	13954	12639	10850	12230	11276	15020	12457	14584	12750	12458	11286	13189	16078	13681	17916	15052	15663	12598	12510	11246	11378	14457	12288	11478	12008	11918	LOC18779311
18790563	1528	1215	1268	3983	3585	1262	3615	3396	4899	3415	2970	3525	2679	1955	3246	2323	2354	2839	5508	5282	6533	5406	7708	4327	4412	4221	4284	7275	5938	6513	6407	6998	5511	9106	9219	5452	13175	9524	11024	18574	17704	12732	28954	45396	36535	70216	67752	78436	LOC18790563
109946432	10462	10653	10652	9719	10836	6398	13914	9527	12867	14084	14478	13604	17102	18214	19434	14998	14468	14923	10781	9420	10397	12526	13428	14557	15086	13941	14885	16360	14801	14288	11834	11471	11603	15123	12112	12304	13980	11124	14287	8751	8544	9336	5399	5702	5705	4757	4984	4560	LOC109946432
18791719	9612	8515	9082	14931	14217	15640	14860	15382	16176	12920	9229	11154	10235	8335	8524	9462	8638	12673	13978	14858	14182	13279	14356	11918	9485	11106	9649	11461	9552	12339	15394	14312	12353	12306	14995	12299	10020	12778	11868	11580	12792	11756	10684	9043	10040	8827	9167	9233	LOC18791719
18783666	12269	13036	13193	11182	12057	10381	13540	9826	12329	14575	15700	15593	14176	13504	14193	10763	9173	11168	12329	11426	13850	13335	12884	13032	14582	13117	13189	13787	12465	12237	12409	11996	11335	12483	10713	10453	13368	10304	11610	10124	9010	10904	5745	6397	6690	6977	7010	6649	LOC18783666
18770262	6018	6037	6372	8963	12948	4573	12077	7860	11846	13771	17931	17562	13676	12002	18145	12338	11069	10697	20278	15392	22674	12555	13798	16897	17679	18625	22569	15366	13422	10285	9728	9427	11744	14958	12000	11392	13101	10774	12266	7351	7417	8080	4342	4669	4279	3763	4088	3807	LOC18770262
18790312	4483	3992	3690	24097	20747	13625	15238	17998	17975	16915	9842	12400	6143	4558	5181	5758	4921	7505	13571	17824	19691	10840	11569	8634	6489	7480	6920	8280	6903	9398	16037	15527	13363	7488	9326	6814	15979	14650	12734	15516	18748	15038	15508	15015	10577	10009	10552	9805	LOC18790312
18784465	7431	7166	6898	11858	11298	14023	11658	11390	12106	11407	8456	9756	9765	7739	8695	9108	9442	11151	9740	9555	10004	9883	10899	9637	8943	9213	9252	10694	9085	10104	11700	11634	10168	12417	13091	10640	11693	14496	13972	17174	17097	15451	16657	18805	18571	12630	13258	13030	LOC18784465
18784067	14935	14829	15115	12609	11988	5522	12113	12294	14134	11754	9795	10704	10150	9572	10059	9450	8185	10538	10858	10462	13493	11199	12328	10393	8632	8997	8521	9518	8839	9848	11156	10588	9357	9575	10331	7833	14885	10783	11179	12461	12658	11762	13758	14576	12692	14477	15971	15857	LOC18784067
18769724	5014	5224	4950	11295	10360	19816	13970	14784	17089	13792	9376	11048	8464	6768	7267	8716	8035	10610	8354	9050	9835	9567	10301	8908	7776	9019	7739	9870	8193	9592	11489	10282	9902	9270	12208	8624	12468	12535	12685	14382	15183	14066	16862	18189	15213	18596	19426	18901	LOC18769724
18780697	16194	14701	15604	15447	16542	13488	10999	9408	10944	14938	14906	16099	14226	13524	15001	11769	11746	12325	18891	18050	25840	11444	11227	12746	10197	10240	10731	11846	10981	10992	9841	9419	9117	10592	9743	8943	11049	8611	9705	6923	6306	7255	4145	4395	4320	4282	4546	4101	LOC18780697
18783155	4081	2936	4525	11072	14162	1813	8530	11908	14211	7315	5831	7711	4685	3652	3105	3881	3541	7735	11234	10749	13647	13009	16883	10323	8078	8253	6274	7894	7414	11668	22626	22427	13847	15387	17727	12211	18184	19031	13651	18663	26568	20578	16732	7983	13047	12346	10499	11277	LOC18783155
18777710	8839	9743	10176	11972	13833	12702	12057	10305	12524	15166	15595	15563	13046	11230	13660	10556	8677	10542	13095	12765	13834	12146	12333	11841	13107	11347	12560	12000	11164	10877	11838	12029	10936	10987	9395	9230	9677	9773	11209	12612	10418	12700	6840	7344	7700	6422	7557	6682	LOC18777710
18778639	22	34	23	5755	7463	3723	5685	4001	6091	11408	13867	10122	6295	5502	10566	5317	5302	3363	6439	4635	6564	11373	12268	14675	15049	15434	15086	9369	6355	7605	4481	5575	5565	11306	15263	15924	17758	16341	19379	32487	27126	27805	15024	18750	11871	17551	17534	16074	LOC18778639
18779553	13409	14318	14561	11554	11599	8416	12363	10000	12818	14578	15412	15656	14254	12477	14111	11444	10203	11670	11170	10529	11256	11139	11569	11378	12625	11112	11608	11468	10757	11021	10933	10506	10429	10484	9292	8714	9031	8714	10373	10451	9153	10912	6830	7137	7710	5982	7209	6863	LOC18779553
18774843	2520	2235	2873	5824	6271	5722	14059	13097	12613	13163	13021	12884	19803	19113	20060	14332	13265	16335	7540	7253	8064	13885	15068	17158	13393	15661	14059	17103	14487	14919	14011	13869	15243	9267	10279	10538	16762	11475	12792	6935	4988	7155	4103	4731	3279	4659	5100	4186	LOC18774843
18792034	11960	11870	11642	10704	11309	13172	12708	11472	12941	13912	12599	13399	14272	12031	12861	11979	10897	13593	10109	10346	10208	11902	11530	10573	9685	9599	9585	10383	9158	10341	11517	10667	9943	10122	10646	9167	8720	9789	10087	11027	9807	10823	8259	7881	8699	10004	10356	10372	LOC18792034
18789097	17506	19120	18057	14539	14876	10168	9731	9407	9619	12053	10305	12473	7840	6438	7923	7323	6992	7947	12822	12464	14918	8146	9112	8563	7716	8554	7811	8632	7213	8249	9299	9463	8788	9167	10867	10000	15228	13883	13903	12363	12585	12028	10791	11813	10886	11437	12006	11132	LOC18789097
109948960	15823	14027	12000	24691	20160	37487	20148	25215	29369	13602	8023	8606	11148	6442	5939	10858	8536	18847	9077	14388	10740	18518	22347	11318	5444	6027	4129	4834	4109	6363	14494	9518	8369	11850	10397	5552	5684	7438	5298	4794	5549	5048	4510	1345	3044	3088	2777	2868	LOC109948960
18791503	5819	5485	5399	10816	10573	16915	14457	15395	15956	13157	9083	9732	9571	8893	9348	10162	8947	10817	8476	8369	9449	11412	12391	11396	8873	9834	9754	12175	10771	11593	11979	11754	10919	10253	11304	9619	12058	11733	11883	12650	12137	11400	10895	12493	10297	10808	11785	10800	LOC18791503
18766576	11207	14968	13327	11456	18416	15877	11625	4709	8431	7487	7845	8525	6164	5342	9687	6263	5327	5236	19989	13564	18508	5792	5757	6015	4991	5132	5297	10006	8125	11081	6342	7298	5659	6072	6207	5165	12139	11202	12465	13910	15877	10111	34471	26058	18866	13250	14178	12560	LOC18766576
18791231	10199	11259	10771	8097	9356	4737	11906	7949	11019	13529	15150	13988	16267	14384	16902	13516	12258	13057	10454	8913	9608	12066	11249	13087	14279	12715	14369	13473	12670	12123	11405	10932	11104	12321	11021	10291	12098	9963	11495	8604	7201	9078	4987	5410	6078	5070	5649	5110	LOC18791231
18787199	7453	8179	8201	9836	9930	4134	13039	11490	13413	13057	12870	13031	13439	12961	13941	11905	10341	12852	10575	10329	11335	12018	12716	12586	12988	12304	11898	12191	11105	11351	11512	10765	10651	11711	11680	11265	13012	10851	11575	9431	8734	9620	6054	6478	6339	7494	7404	7361	LOC18787199
18776584	4982	4091	4507	6086	6636	3570	12555	8548	10302	10938	12129	11902	16610	15627	19493	15345	14691	16152	8928	7808	8656	12763	14483	16776	13371	14425	14174	14381	12797	12184	12084	11982	11953	10555	12044	11471	9911	11120	11324	9539	9071	9766	5421	6770	5882	6150	6339	6148	LOC18776584
18771354	18569	20476	17814	30195	24424	32694	23882	18602	31171	12360	6225	6528	7215	8428	8206	5865	4100	6216	9330	11560	12283	11570	13254	8416	5173	8244	5341	6168	6282	8915	13968	8516	13578	9495	10224	6349	3329	2998	3071	4180	4061	4587	3092	2411	1965	10060	9778	10037	LOC18771354
18777926	8418	5763	8077	24085	24661	32519	10919	8349	10008	17440	18993	21812	10966	9649	12888	8792	7615	9709	21779	20580	24890	10630	10944	15001	10414	10227	10717	8980	7847	7746	8133	7363	8310	6254	6096	7285	6195	11980	11643	4892	5099	4131	2263	3168	1598	1487	1514	1431	LOC18777926
18792273	10368	10840	9926	8188	9332	5261	9186	6518	9128	10934	10400	10804	12529	11021	12779	9995	9507	10401	12575	8884	10815	9991	11300	11952	12762	11417	12477	15236	12903	12503	10044	9727	9455	16528	14178	12572	14253	11843	14054	8730	8454	9229	7225	6731	10738	8941	8553	7874	LOC18792273
18782263	12594	11537	11168	9746	10379	10233	10631	8869	10803	12619	11938	12978	12640	10580	11938	11177	11326	12501	9179	8532	9622	9964	10630	9848	9965	10194	10460	11867	10425	10937	11199	10745	10021	11922	10655	9545	10091	11019	11702	11170	10925	11173	9500	9874	10255	7585	8006	7859	LOC18782263
18768344	12601	12263	12089	8398	8732	4924	9376	7537	9284	10131	10113	11552	12458	10366	11857	11353	10777	12938	9114	8727	10063	9269	10557	9095	9064	8810	9320	10674	9046	9594	10772	10739	9879	10482	10448	8819	12636	12135	12475	12176	11947	12224	12530	13158	12761	10969	11138	11084	LOC18768344
18787294	12525	11568	11323	12795	12108	15425	11194	11787	13066	12586	9516	11044	10816	8843	10268	10968	10501	11569	8609	8758	11255	8237	9345	8603	7713	8535	8318	10435	8897	9502	10268	9919	9557	9484	11164	9497	13783	11646	12074	10267	9503	9761	9345	11422	10378	10748	11184	10286	LOC18787294
18778233	9121	9170	9206	14305	12598	24147	10369	11758	12255	11369	7931	9591	7219	5311	6283	6813	5224	7526	9894	11231	11966	9048	9138	7186	5986	5563	5849	6578	5449	7013	9947	9356	8103	7608	8343	5659	8278	9579	9174	13534	13236	12870	16203	17457	16578	21118	21488	21396	LOC18778233
18770737	6605	6499	6870	11395	11508	21025	11337	10572	11871	12540	11823	12364	9591	8738	9549	8566	7225	8602	10679	10137	10199	12036	11914	11217	11221	11110	11177	12031	10977	11497	11462	11532	10160	11126	11625	10743	9668	10375	10502	11604	10435	10321	7834	8034	8043	10620	10012	9880	LOC18770737
18781866	6060	4891	5423	14686	13947	14259	11516	13153	13984	10266	7127	9236	6957	5237	5983	6809	6314	8374	12556	13794	14727	9410	9772	7323	6995	7354	6917	7941	6760	8771	11070	10608	8496	9693	11651	8251	12636	12858	11860	14418	15801	14360	12462	14882	13434	13934	14682	14499	LOC18781866
18767368	4782	5526	5677	14809	12915	13379	11348	13729	14477	11254	8465	9757	6447	5309	5321	7487	5464	8218	11803	13673	14066	10011	10628	8022	8174	7386	6915	6403	5393	7164	9828	10104	7777	11963	13280	10179	10940	11036	9908	14210	15243	14491	12053	11773	11684	16532	16120	16652	LOC18767368
18777334	11061	10072	10207	9009	9688	9493	10191	8897	9644	10714	9837	10981	13311	11003	12017	11234	11525	13722	8873	8041	10217	10178	10939	11434	9915	10350	10108	12430	11169	11979	11722	12001	11059	8888	9725	8717	14678	11478	12041	12346	10868	10754	7542	10177	7820	6089	6390	6143	LOC18777334
18776263	12372	12281	12656	10202	10994	7325	11021	8104	10924	12808	13737	14350	13403	12473	13561	11185	9903	10818	11465	10307	10859	10698	11268	11553	12707	10633	11935	11387	10529	10352	10068	10395	10172	11960	9004	9097	7293	8935	11209	9332	8326	9941	5848	6103	6265	5961	6416	6164	LOC18776263
18777085	9125	9668	9968	9885	10060	8111	11453	9067	11273	13328	12956	12970	13104	12180	13335	10870	9932	11315	10984	9720	11133	10964	10708	11236	11331	10619	11048	11543	10242	10303	9967	10089	9662	10881	9814	9118	10737	9440	10739	9724	9064	9881	6585	7488	7390	8201	8490	7932	LOC18777085
18787472	12365	12162	11964	10318	10648	11759	12078	10534	12450	10797	10079	10126	11271	10300	11035	10339	9220	11278	10042	10265	10636	11125	11403	11010	10077	9815	9921	10495	9407	10004	10076	9482	9119	9966	10649	9649	11367	9536	10063	10269	9898	10222	7443	7519	7346	8186	8853	9016	LOC18787472
18784230	2073	1593	2146	8254	11117	1022	6828	9958	11865	5306	4805	5836	4406	2537	2830	3180	3538	6482	10783	9890	12732	12092	14124	9420	7258	7341	6823	6518	6367	10038	18711	17860	11944	13562	21305	11779	26141	16937	13450	18411	24177	20546	14094	7223	14063	11052	11848	11242	LOC18784230
18773481	11206	11062	10687	12075	11121	20069	11691	10687	12188	12343	10714	11219	11134	9973	10879	10026	9826	11441	9542	9460	10540	9541	10515	9983	8922	8915	8984	10451	8908	9748	10544	10193	9197	10105	10353	8354	9433	9883	10135	9863	10236	9697	8263	8635	8119	7896	8169	7836	LOC18773481
18772615	4481	4156	4064	8259	7859	6612	7042	7329	8031	8199	6407	7116	6609	5575	6003	4957	4895	6784	8876	8432	10095	9092	10869	8013	7258	7751	7502	10040	8339	10218	12234	12132	10245	10546	10943	8325	11899	12769	13089	15163	15455	13769	16168	17672	17704	23660	23724	23502	LOC18772615
18775159	14196	14086	14127	9324	9373	6433	11771	9453	10960	11851	11613	12261	14473	14059	15005	14959	13184	15386	10452	9090	10846	11065	12534	12731	11190	11416	11410	12101	11025	10273	10175	9734	9204	9741	9256	9165	8397	9092	10101	8305	8677	7028	4156	4728	3704	3394	3829	3431	LOC18775159
18766795	6438	6155	5829	12222	11621	29729	10433	10724	11707	11180	9208	9990	8730	6796	7909	7494	7267	8931	10491	10622	11922	9555	9669	8524	7518	8139	7909	9728	8213	9787	11001	10595	9167	8773	10544	7794	10828	9798	9948	11487	12796	10929	11175	12372	11607	10963	11887	11588	LOC18766795
18776168	8221	8383	8227	10606	10280	14034	9602	9595	10367	12099	9872	10848	10178	8469	9498	9510	9217	11542	10489	10241	10891	10415	10577	9886	8209	9022	8333	10208	8977	10457	10757	10216	9044	10017	11852	9222	9716	10326	10277	10690	10715	10298	10172	10949	11006	10844	11275	11149	LOC18776168
18777913	13905	11552	12210	9149	9487	11155	9205	8356	9951	10679	9249	11388	9270	6937	8588	8161	8382	10112	9307	9242	12629	8354	10151	8184	7745	8477	7774	9419	8026	9078	9703	9476	8460	11231	10849	9144	12620	11416	11341	12015	11811	11453	11417	11891	12846	10065	10966	11194	LOC18777913
18777071	16098	20502	19293	7912	8954	5437	11682	8242	10721	12484	12087	11413	13364	14700	15593	11944	10782	11028	9907	8263	8962	11439	11223	13336	12203	10825	12603	14520	12918	12265	9892	9295	8733	10805	9450	8877	9245	8910	10627	5796	5104	5805	2985	3745	3532	3119	3270	2840	LOC18777071
18772669	5643	5393	5821	14364	13674	11285	11237	13609	13351	13674	10467	10469	7675	6802	7141	7717	5817	7701	9892	9666	11177	10787	11364	9355	9192	8194	7891	10310	9001	10401	10867	10921	9656	9970	10454	9146	10298	10113	10267	13050	12788	11628	9311	10735	8255	10689	11571	11569	LOC18772669
18788154	7394	7469	6847	12803	11864	11316	7650	9540	10369	9589	7504	7837	5807	4780	6186	5937	5174	6397	9881	10000	12079	9172	9974	8650	7212	7165	6816	7837	6175	8372	8766	8991	7168	8783	10491	8405	13889	10185	10418	13520	14136	12739	15989	16927	13983	19621	18644	18999	LOC18788154
18781826	16894	18840	18441	13142	12779	13249	6348	6899	8055	10094	8757	8102	6813	6525	8172	5014	4678	4505	11744	11583	13939	8392	7120	7825	6270	6039	5996	8836	7296	10631	6509	7304	6586	7335	9355	9018	10442	9453	9419	13812	12490	11382	13334	15196	11018	14230	14988	14559	LOC18781826
18776853	10347	11702	11218	6563	7490	4211	10785	6675	9740	10299	10422	9847	13453	13055	14559	11136	10008	11210	10598	7084	8149	10793	11655	14331	14687	13287	13907	15549	14440	13250	10165	10008	10586	14002	11880	12794	11684	9650	12398	6321	5759	6361	4237	3855	5211	4648	4443	4011	LOC18776853
18784722	5549	4873	5385	12674	12045	4653	6626	7743	8337	7606	6813	8619	4819	3302	4394	4109	3819	5577	10040	10874	12223	8573	8570	7130	5906	5767	5393	6526	5032	6697	9511	10456	8104	8755	10921	8561	13878	13841	13497	17522	18037	15499	17346	21076	16509	21670	21414	21111	LOC18784722
18784515	8900	8239	8459	11494	11563	24252	10408	10632	11448	12348	9531	10381	8148	6713	7352	7773	7071	8551	10716	10708	11349	10337	11019	9242	8608	8632	8470	10092	9077	10163	10341	9672	9033	10272	11099	9121	10281	10103	9858	11069	11202	9825	8531	8917	8337	8318	8462	8308	LOC18784515
18783528	8199	7785	7303	11260	10316	12121	10347	10621	12052	11251	8203	10235	7039	5182	6891	6634	5840	8198	7827	7970	9221	7780	8106	6737	6081	6241	5821	6321	5615	6491	8716	8979	7265	6795	7656	5539	7570	9393	8880	14115	14116	13214	18326	19731	18067	19223	18989	18296	LOC18783528
18786519	27779	30339	30479	11827	11888	14432	10075	11707	12722	14142	10500	11801	7780	6576	6982	7061	6589	7787	9931	9418	10404	7556	7351	7211	6180	6321	6339	6763	5830	6808	5604	5923	4999	8445	11857	9974	8183	7739	7731	8002	6759	7030	5686	6223	5686	9161	9110	8714	LOC18786519
18773168	1746	1142	1317	10155	9913	8614	10752	10024	12212	7455	6490	7150	7115	5142	6552	7156	6716	8319	12975	13168	14253	11183	10629	9300	6569	8446	7174	6547	5419	6817	10277	10660	9245	9234	14473	12332	12627	11338	10607	11912	12555	12692	12099	13054	12499	16357	15951	17320	LOC18773168
18770359	12090	10860	10108	9801	9845	15226	8870	8782	10407	10842	8321	10730	8816	6469	7863	8450	8375	10844	8557	9098	10699	8299	9935	7761	7047	7622	7032	8889	7240	8692	9734	9276	8085	10060	10089	7895	10974	10884	10449	11802	12318	11216	12814	12127	12935	8447	9266	9327	LOC18770359
18781339	9503	9669	9042	9057	8751	11954	10585	9373	10702	11514	9533	10680	11337	9456	10088	10121	10270	12162	8191	8111	8572	9129	9718	9332	8063	9293	8359	10440	8795	9869	9596	9339	8378	10099	11037	8919	11424	10310	10773	10128	10067	9885	8849	9263	9432	8085	8533	8077	LOC18781339
18772407	12715	14481	14077	9359	10748	6176	9986	8474	9402	11315	11141	12196	12073	10766	11800	10224	9484	10934	11518	10625	11599	9472	9654	9485	8128	8637	8424	10484	8874	10419	8471	7894	8061	8785	9883	9297	9727	10878	10649	8939	7881	9091	6353	6752	8557	6045	6703	6352	LOC18772407
18786228	7871	6159	7432	16427	19409	13813	9664	8517	9202	15789	20083	21412	13309	10189	14122	8490	8279	10016	23332	18972	30777	9280	9289	10644	7721	9088	8880	9037	8337	7336	7154	6801	7840	6476	6222	6602	8547	6569	5929	4706	4092	5127	2068	2059	2108	1933	2038	1809	LOC18786228
18789557	12299	10782	10916	10047	9778	10415	10249	9512	11188	11489	9308	11796	11902	8908	10594	10781	10881	13169	7939	7978	10005	8192	10220	8539	7659	8954	7635	9400	8001	8634	9393	8934	8318	9982	9422	8151	9938	10063	10232	10063	9686	9015	8007	8402	8563	6282	6615	6919	LOC18789557
18793992	13877	13595	13438	10516	11145	9352	9361	8861	10206	10501	9089	9231	10230	9997	10555	9922	8924	10323	11366	9500	10778	10046	10474	10008	8530	8516	8562	10662	9108	10241	8998	8652	8348	10969	9670	8248	9050	8853	9976	8248	7339	7184	5934	6818	6324	7629	7232	6991	LOC18793992
18776800	16007	17736	15928	10620	10236	9068	10301	10045	11685	10545	7846	8237	8577	7868	8507	7792	7500	8893	7363	7854	8627	7931	8823	7607	7331	6899	6879	8440	7197	8352	8402	8310	7337	8904	9552	7685	11500	8859	9353	9888	9755	9484	9478	9553	8638	11435	11736	11727	LOC18776800
18785114	4134	5024	4365	5601	5521	2662	6086	5300	5268	5608	4991	4585	9370	6882	9480	13033	11548	13363	5610	6257	4825	7795	7430	6943	6102	5160	5727	5667	5023	7035	5834	6016	5229	7200	9259	6991	7904	9049	8858	17026	13723	15379	19250	32270	22051	20449	23598	21981	LOC18785114
18793356	10538	11633	11477	13423	12956	14402	9565	10811	10855	11421	9504	11019	10456	8305	8877	9384	9757	11141	10587	9441	10888	7833	7040	6802	7430	7342	7279	8450	7320	9884	9235	8052	7883	9523	10777	7556	7870	7931	7973	10217	7948	9701	5317	6270	8700	8503	9241	9146	LOC18793356
18777961	13638	13819	13201	9253	9386	9697	9298	8570	9514	10475	8770	9776	10987	9046	9543	8763	8223	10443	8807	8404	9238	10079	10700	9359	8004	8803	8440	10023	8592	10285	10834	9965	9056	8754	10001	8065	9657	8961	9063	8610	8646	8614	7279	7918	7612	7177	7260	6885	LOC18777961
18770643	9104	8802	9026	8423	8514	14322	9423	9166	9980	10643	8982	9995	10073	8993	9951	9348	8503	10529	9041	8437	9103	9288	9924	9237	8826	8869	8769	10254	9081	9595	9828	9477	8593	9623	9710	8749	8368	9392	9733	10599	10082	9409	7236	7854	7362	7643	7909	7706	LOC18770643
18782928	10083	10329	10027	9145	9071	9670	9551	7837	9672	10233	9687	10100	10490	9287	10231	8816	8562	9936	9071	8848	10313	9269	10308	9666	10165	9667	9855	10464	9245	9713	10392	9703	9224	10536	9550	8639	8634	9116	9734	8693	8686	8545	6600	6839	7322	6688	6982	6746	LOC18782928
18790977	10612	10745	11467	8716	9864	4764	9080	7182	9226	12323	12453	13038	10701	9552	10585	8399	7838	9370	9293	8939	10515	9071	9422	9672	11072	9648	10373	10789	10049	9444	9432	9942	9032	10286	8187	7862	10295	8592	9783	8894	7918	9878	6189	6194	7147	6106	5909	5761	LOC18790977
18791413	7689	8425	8200	9518	10292	10330	9959	7991	9980	12754	13070	13569	10492	9434	10342	8307	7391	8223	10866	9992	10823	10027	10151	9578	10866	9761	10409	9904	8924	9090	9200	9360	8692	9345	8630	7947	9421	8111	9051	9075	8309	9947	5700	6020	6575	6275	6598	6300	LOC18791413
18792274	13482	13656	13973	15064	14128	15673	11533	12851	12920	12860	10082	11081	8998	7177	7916	7590	5938	8292	11395	11366	13747	8176	8162	6879	6279	5810	5804	6421	5462	6911	7444	7014	6682	7108	8114	6585	7892	6297	6419	7641	7117	7471	7301	7935	8269	10144	10347	10646	LOC18792274
18775971	8931	8794	8358	8035	8431	7304	9398	9539	10921	11282	9133	10098	7874	7795	8158	8447	8055	10065	8986	8500	10848	9302	10495	9611	7972	9228	8525	10328	8847	10215	10424	10676	8848	8648	10190	8852	11113	10114	9094	11003	11158	9923	6931	7781	6569	8157	7904	7823	LOC18775971
18776938	7360	7820	8397	12806	12913	25705	10406	10100	10923	13508	12486	13896	8865	7392	8966	7282	6016	8107	11010	10431	13323	8846	8772	7719	8682	7760	7878	8349	7384	7729	9024	8800	7740	7607	6764	5913	9504	6975	7809	8097	7380	8377	5944	7078	6035	7576	8293	7613	LOC18776938
18781799	5999	6640	6731	7059	7571	9856	10409	8573	10180	10154	8546	9869	8986	7518	8267	6924	7504	8716	6962	7203	8635	8209	9508	8757	6743	8348	7176	7672	6423	7344	7617	7460	7272	8869	9801	10593	14403	11583	12171	13372	11486	12883	8906	9428	8979	12194	13069	13982	LOC18781799
18772279	6380	6277	6758	8972	8520	7007	9699	9062	9877	11234	8743	10213	9410	7622	8155	9637	8345	11788	8003	8589	8869	7338	7980	6559	6122	6422	5728	6749	5654	7012	7760	7875	6253	6322	7249	6078	8151	7818	7723	11120	10758	10584	12761	13168	13439	18658	17258	18558	LOC18772279
18772964	8110	8594	8682	8260	8608	10173	10080	8168	9691	11512	12989	12909	12579	11137	12447	9571	8313	9966	9377	9063	8450	9713	9530	10012	10510	9399	9847	9845	9074	8964	9155	8808	8374	9322	7856	7644	6937	7758	9249	9143	7795	9059	5530	5654	6407	6302	6613	6378	LOC18772964
18773388	6455	7479	6427	13684	12991	12007	12957	12723	12397	12183	8938	11393	9083	9054	8515	8475	7041	9540	14134	15004	17582	9991	10174	11075	7335	8742	8163	9613	8601	9460	7175	7076	6542	7520	8644	8038	9528	8669	9164	6551	7002	6282	5798	5250	4643	4467	4737	4680	LOC18773388
18787594	8284	8762	9529	7799	8039	5473	9808	7711	9391	10809	11498	11915	12179	11518	12116	10302	8735	10597	10169	9259	9870	10184	10233	10809	10964	9972	10420	10299	9472	9533	9105	9349	8747	9498	8194	8434	8710	7728	9183	7733	6974	7957	5279	5541	5966	5232	5370	5478	LOC18787594
18787773	4601	3898	4247	6666	6665	12288	13064	11187	12711	7879	6877	6205	12371	13117	12652	11013	10939	11797	6816	6919	6583	12515	11827	14304	8048	10421	9660	11060	9407	10061	10281	9573	10168	8216	11788	13006	11534	10576	10633	7615	7137	7389	3521	4008	3540	4630	5174	5014	LOC18787773
18771170	8506	9097	9164	8405	9318	12266	10390	7750	9480	11961	12515	12563	11902	10748	11791	9790	8114	10024	8764	8197	8656	8909	9493	9513	10705	9536	9345	9817	9300	8820	8733	8876	8147	8520	7455	7688	7076	7260	8814	8122	6913	8626	5363	5631	6510	6898	6693	6784	LOC18771170
18773260	10816	11578	10683	10073	10240	14541	9238	8725	9414	9397	8146	8799	8505	7925	8239	6700	6032	7497	10010	9767	11073	9723	10130	9582	8633	8659	8506	8568	8245	9066	9583	9130	7898	8429	8862	7837	7945	8094	8781	9781	9412	9215	7991	8108	7825	6626	7059	6824	LOC18773260
18778380	10300	10707	10594	9286	9847	11775	8939	7440	8898	11392	10834	11529	10181	9074	10146	8397	7948	8925	9250	8449	9552	8852	8904	8948	9519	8774	9202	10062	8977	8711	8656	8412	7964	9688	8015	7572	9170	7935	9393	8386	7854	8772	6389	6864	7007	6056	6912	6211	LOC18778380
18775292	5740	4707	5372	12923	12319	15255	9152	7895	8515	9419	8924	10518	9894	8489	9453	9018	8471	11093	9922	10267	11782	8306	9118	9223	6796	8132	7010	8967	7506	8440	9393	9189	8447	7129	7947	7506	10902	11089	11245	9751	10061	8961	7200	8696	6488	5698	5827	5417	LOC18775292
18781943	9100	9555	9571	8688	9435	11225	9872	7834	9179	11822	12406	12780	11507	10273	11077	8769	7577	9321	8334	7579	8952	8673	8707	9032	9655	8770	9346	9629	8927	8962	8512	8595	8015	8293	7448	7384	8915	7155	8290	7954	7148	8511	5351	5694	6817	7268	6866	6711	LOC18781943
18791247	9669	8658	9275	8805	8686	5947	8901	8020	9495	9013	7451	9145	8313	6460	7688	7198	7313	8655	7704	7630	7988	7686	8742	7728	7140	7724	7326	8433	6959	8341	8744	8274	7610	9031	8884	7757	7549	9921	10183	10524	10707	10348	10523	10785	10890	11434	12233	12421	LOC18791247
18782217	6820	7112	7490	6822	7095	4959	9686	7394	8960	10468	9299	9414	12947	12439	13661	11189	10245	10436	8990	7826	8370	9129	9268	11243	10332	9942	10520	11975	10337	10796	7814	8332	7682	11072	10476	10132	9314	8057	10497	7341	6873	7087	4485	5088	5208	4800	4903	4916	LOC18782217
18786880	3318	2851	2621	7238	7523	6583	9184	7625	9456	9406	8480	8248	6961	6544	6663	7277	6333	8716	7522	6952	10350	9623	11418	9466	7512	8814	7637	8134	7436	7851	10011	8906	8295	10022	12502	9369	14286	10574	10137	13056	13994	11914	11272	9549	8780	9263	10098	9324	LOC18786880
18786614	9399	9921	10230	7864	8687	8338	10283	8319	10114	11792	12055	12698	12553	10970	12041	10048	8953	10602	9516	8511	8957	9763	9269	9952	10735	9453	9749	9529	8927	8688	8688	8472	7955	9546	7882	8025	6894	7375	8549	7005	6153	7642	4179	4367	4542	4665	4461	4641	LOC18786614
18766643	8825	11035	11471	4496	5014	1478	7482	4509	5946	5704	6439	5954	12556	12056	12205	8555	8405	8815	7615	6448	6799	10863	12163	14207	12185	16450	16475	14424	14238	11391	9531	7773	8231	9345	9473	10709	10979	10193	11702	7091	6670	8799	4241	4200	4966	3111	3813	3682	LOC18766643
18775196	7153	6083	6508	6003	6905	5583	9557	6549	8413	9405	10807	12003	12866	11418	12275	11202	11831	13414	7541	7425	8701	9767	10922	10488	8744	10526	9923	11199	9731	9680	9828	9004	9095	9446	8863	8900	10183	9989	10157	8776	8086	9214	4582	4773	4365	3526	3678	3588	LOC18775196
18771198	9261	8240	8566	7641	7873	7301	8825	7292	8899	9804	8982	10295	9567	8091	8971	8576	8709	10816	8149	8095	9223	7792	8987	7799	7745	8586	7567	9476	8007	9147	9075	9107	8183	9439	8572	7340	8257	9925	10238	9916	10038	9696	9352	9157	9300	7016	7572	7869	LOC18771198
18778082	11552	10312	10509	9146	8397	11463	8559	8206	9166	9486	6988	7797	11033	10466	9772	11356	10427	12801	5623	5337	6376	8142	9249	7610	5961	6566	6054	8321	7478	8777	9637	8872	8221	7770	8606	6118	8901	8655	8660	9187	9918	8500	8042	8873	7999	8239	8780	8608	LOC18778082
18785336	7168	7404	7820	8761	9167	9525	9457	7488	8523	10255	10281	11024	9863	8402	9387	8201	6611	8646	8582	8583	9707	8844	8828	8158	9224	8490	8514	8813	8215	8213	8379	8837	8004	8016	6848	6969	8009	7846	8816	10024	9200	10873	7385	7467	9138	9267	8936	8914	LOC18785336
18789464	9655	10269	10168	9624	9392	12856	9190	8043	9725	11172	11263	11485	10013	9356	9614	8057	7222	9076	9611	8931	9644	8978	9012	9020	9443	8457	8359	9252	8025	8623	8243	8322	7727	8464	7800	7175	8700	7330	8531	7811	7499	8215	4962	5531	5711	5654	5727	5712	LOC18789464
18788345	3197	3572	3155	6024	6213	6059	8955	8865	8663	10920	9883	10828	9259	6684	7856	8346	7586	9225	6722	6567	6577	7887	8968	7028	8652	7825	8018	7326	5921	7621	9276	9093	7724	8903	10611	8088	7341	11188	11069	14018	14482	13741	11383	10118	10436	10022	10007	10412	LOC18788345
18793658	25087	26682	27937	14932	15432	18673	9098	9442	9257	15909	12407	15762	8982	6212	6454	5068	4842	6482	10328	10550	11516	5056	5608	5032	5852	4981	5293	4120	3632	4644	5079	4364	4704	7620	7798	5868	5184	5772	4834	6914	4793	6602	3452	2294	5432	4396	4219	3990	LOC18793658
18781169	7293	7959	7840	10273	10413	10854	9630	8349	9722	11932	11036	12332	9726	8415	9408	7426	6870	8451	10242	9961	11353	9439	9127	8848	8976	8247	8659	8438	7796	7976	8594	8726	7811	7541	7535	6470	8540	7228	7753	8467	7691	8822	5887	6051	6342	5400	6297	5787	LOC18781169
18793898	3881	4438	3773	6639	7016	6152	11162	9923	11587	11034	8777	10364	9390	6811	7965	8264	7860	9745	6444	6826	7249	8393	8708	7336	7353	7816	7134	6763	5601	7472	7517	7402	6363	9628	10865	8162	9849	9370	9554	11909	11278	11671	10099	9616	11444	9937	10114	10700	LOC18793898
18786972	10841	11079	11517	7895	8301	7809	9411	7689	9437	11597	11328	10619	12177	10905	11635	9342	8418	9988	8635	8089	8974	8968	9046	9991	8913	8614	8832	8818	8359	8794	8064	7728	7124	8901	8600	7465	9274	6774	7440	6533	5539	6637	4128	4109	5685	5350	5377	4980	LOC18786972
18785532	6093	6236	5914	10145	9756	15489	10136	10490	11438	11295	8570	8801	8401	7957	8497	7613	7150	8140	7717	7582	8774	8590	8354	8242	6974	7235	7226	9082	7847	8760	8738	8234	7482	7166	7942	6359	8815	8594	8341	8684	8913	8018	8417	9493	7589	7938	8463	7840	LOC18785532
18775757	5505	5113	5408	16397	15438	20040	10731	10959	12368	10754	8253	10888	7220	5205	6319	7046	6129	8470	12821	13518	14483	8804	8925	7533	5151	5741	5551	6203	4946	6455	7274	6353	6590	6605	8343	6439	5874	8017	7733	8415	7486	7873	6502	5942	6045	8398	8389	8208	LOC18775757
18780647	9356	9926	10546	7430	8048	4197	10004	7344	9380	10619	10832	10767	10752	10766	11403	8681	7851	9237	8424	7642	8736	8748	8881	9888	10343	9200	9688	9816	9276	8831	7912	8265	7757	9099	7631	8075	9548	7542	8766	7384	6353	7570	4255	5068	4685	5621	5290	5372	LOC18780647
18775636	3140	2228	2575	6941	8017	4229	9691	7384	9430	8800	10299	11148	9712	8059	8649	8555	8452	12052	9071	8278	8512	10112	10656	9540	7960	9698	8399	9934	8654	9220	10264	10163	9204	9012	9076	8282	6935	10682	10965	9870	10117	10049	7793	6860	7250	5217	5940	5393	LOC18775636
18791872	9596	10471	10060	7996	8542	6660	8998	6618	8584	10455	11599	10809	11038	10070	11784	8521	8059	8923	8165	7798	8488	8883	8532	9499	10105	8985	9707	9314	8906	8303	7961	7812	7668	9307	7691	7787	8544	7234	9152	7386	6733	7757	4553	4804	5308	5750	5620	5483	LOC18791872
18785104	8535	8286	8569	9233	10975	6050	8567	6907	8400	10008	10670	10326	11470	11610	13340	9867	8805	9323	11599	10186	13936	8580	8965	10985	9517	9650	9504	10568	10088	9196	7234	7498	7647	8496	7579	8481	10255	7450	8729	5302	5017	5509	3134	3393	2931	2827	2897	2659	LOC18785104
18783322	5342	5434	5741	8929	9064	11999	9620	7710	9333	10701	9777	11004	8401	7485	7895	7825	6196	8936	8011	7898	9353	8038	8221	7296	7995	7347	6976	7512	6604	7117	8128	8102	6930	6994	6685	6043	7478	7141	7680	10153	9198	10587	9329	9090	10482	10952	10525	10488	LOC18783322
18792614	6966	6304	7076	6181	6987	6517	9184	9096	11859	12761	8672	9895	8827	7752	8095	8811	9354	12216	6240	5781	6724	7897	9268	7953	7374	8109	7003	8952	7964	9743	9472	8135	7999	9376	10851	8705	9464	7976	7958	8606	8363	8329	6627	6975	7342	7659	7750	7747	LOC18792614
18773737	2175	1955	2411	12066	13044	11088	9843	11049	12536	10335	7709	9055	6322	6118	5113	5796	5413	9835	10352	9485	10565	8626	11144	7017	7199	6788	5673	6709	6796	7877	15346	16110	10737	9935	10035	7151	6157	9863	8723	10099	13642	10262	8197	4860	3939	3676	3912	3574	LOC18773737
18780034	6139	6541	6382	7642	8594	12297	9183	7334	8724	10424	10698	10686	11026	10073	10770	8590	7476	8572	8853	8185	8087	9200	9005	9554	9953	9232	9550	9664	9036	8612	8383	8094	8013	8941	7538	7647	6954	7359	8654	7805	6871	7758	4652	5234	5295	5562	5583	5510	LOC18780034
18786134	4735	4220	4171	10532	9954	19541	8335	8985	10063	8193	6436	7351	5551	3907	5178	5167	4708	5819	8524	8907	10417	7243	7588	5801	5198	5282	5170	6425	5103	7000	8832	8290	7353	7054	7977	5519	7621	9146	8610	11757	12415	11160	12270	14163	12756	11685	12143	11569	LOC18786134
18773570	5414	4507	4580	10917	10059	9256	9073	9388	10840	7664	6177	7392	7323	6298	6645	7190	6728	9374	8353	9520	9610	8727	10075	7750	6742	7501	6888	7759	6603	7894	9687	9008	7427	8435	8700	6781	7935	9372	8984	10098	11429	10127	8754	8776	7840	8466	8563	8497	LOC18773570
18767237	6642	6416	5896	14248	11724	15434	11605	12800	15738	11195	7848	9520	6075	5151	5393	5994	5008	7754	9252	8924	9885	8495	8804	6001	5656	6228	5699	6529	5659	7540	10590	8676	8043	6513	7104	4954	6760	8048	7487	8802	8763	8727	8162	8753	7762	6599	8330	7752	LOC18767237
18773732	9382	9697	9905	10343	11745	15427	9057	8488	9493	12632	12439	11183	8353	6691	8064	6728	6059	7568	9528	10124	11159	8820	8392	7773	8332	6919	6681	7065	6734	6894	7739	8215	7319	7528	6794	5603	8533	6597	7218	8098	7275	8661	5388	5340	6208	5248	5618	5175	LOC18773732
18774407	12726	12946	12997	8830	8806	5265	7840	7011	8620	8965	8309	9211	8458	7634	8168	7027	6150	7755	8834	8976	10082	7725	8094	7576	7354	6697	7021	7756	7009	7417	7815	8006	6949	7814	7621	6576	7600	7489	7756	8240	8091	8107	7126	7850	7631	8635	8659	8855	LOC18774407
18772584	12928	13404	13758	8118	9956	8889	8926	6679	8369	9968	10240	9914	11592	11688	12901	9034	8473	8852	11425	9397	11991	8288	8015	10483	8593	8512	8980	10419	9931	8999	6894	7007	6855	8107	6983	7286	6999	6419	8086	4210	4064	4548	2571	2585	2726	2147	2350	2003	LOC18772584
18780564	7120	8598	7003	9594	7864	10716	9496	7584	9609	9969	11271	11761	9773	9102	9689	6759	5784	7700	8259	8202	10756	8729	7691	8427	9827	8979	8549	8074	6970	8759	9020	9519	7279	8813	6283	5822	8516	7321	8537	7455	6874	8069	5338	5367	6096	5030	4861	5827	LOC18780564
18782333	18759	20256	20060	4598	5230	2857	7784	4582	6523	7734	8772	8609	11889	11324	11643	9800	9263	10789	7339	6409	5579	7807	8449	8709	8090	8218	8477	9306	8341	8521	7521	7425	7350	7636	7325	7552	5848	8101	8761	6819	6368	5905	4401	4281	4766	3814	4106	3743	LOC18782333
18793369	7154	8057	7878	8316	8346	7417	8800	6938	8693	10669	11215	10279	10141	9268	10062	8419	7490	8567	8928	8347	10242	8564	8208	8622	9619	8191	8773	8501	7789	7691	7704	7693	7352	8215	7409	6683	10853	6715	8032	7374	6650	7604	4818	5181	5298	5532	5783	5631	LOC18793369
18774257	8378	7918	7486	8652	8248	10982	8596	8090	9133	9429	8047	8368	8418	7308	8220	7867	7455	8998	7964	7892	9212	8068	8164	7495	7265	7083	6792	8350	7300	8056	8066	8085	7128	8323	8532	7128	10735	8030	8683	8394	8436	8045	6475	7746	6512	6389	6660	6598	LOC18774257
18781084	3822	3016	3311	7890	8462	9153	9233	7793	9563	7755	8301	7757	8673	8347	9895	6950	6779	7444	8793	8007	9462	8672	9187	9356	7357	7511	7482	8656	7126	7742	8680	8187	7318	7816	9690	8629	9843	9819	9662	9719	10302	9956	7092	7216	6158	7012	7377	6811	LOC18781084
18781403	4992	4549	4425	11366	10663	9902	6998	7203	8404	7912	7562	8144	4885	4558	5834	5036	4287	4862	9383	9081	10938	7434	7400	7358	5949	6035	5853	5860	4491	5273	6454	6408	6234	7466	9365	8425	11800	9482	9569	11710	11305	10895	10711	12718	9309	11589	11644	11166	LOC18781403
18788148	7215	6794	6854	8456	8740	10647	9452	7993	9434	9878	9414	10129	7850	6677	7957	6669	6435	7503	8423	8177	9818	8642	9249	8198	7914	8167	7934	8320	7222	8071	8430	8032	7245	7542	8303	6900	9613	8001	8241	8185	8090	8039	5985	6648	6263	6368	6540	6151	LOC18788148
18781904	7567	7951	8177	7448	7193	7756	9344	8175	9147	9364	8164	8851	9573	8541	8966	7969	7396	9157	8053	7891	9251	8156	8289	9049	7972	8129	7862	8712	7923	8157	7655	6981	6974	8749	8481	8563	10363	7946	8458	7660	7241	7252	5689	6260	5857	6152	6031	5931	LOC18781904
18766210	44314	52679	52033	7434	7994	4259	5789	4196	5621	6995	7159	7687	6372	6034	6890	5620	4610	5215	7991	6536	6792	5181	5480	5447	5736	4936	5486	5388	5273	5050	4092	3854	3763	7273	5389	4921	4911	4160	5588	4583	3146	4014	1594	2049	2532	3245	3206	3098	LOC18766210
18790372	8717	7839	7881	6378	6360	6346	8474	7450	8869	8988	8691	8278	7425	6331	7426	6376	6503	8075	6984	6857	7978	9157	10714	9133	8810	9453	8515	8423	7286	8476	9649	8949	7790	9227	9951	7953	8838	8001	7928	8815	8923	8682	6655	6071	6578	6162	6323	6388	LOC18790372
18775311	6617	6886	6924	7019	6913	7235	8135	6977	8283	7717	6757	7251	8207	6871	7791	7818	7409	8986	8070	8034	8802	7973	8729	8424	6988	7487	7393	8713	7441	8032	8221	8203	7063	8228	8672	7681	8874	8293	8876	8346	8605	7944	8127	8188	7794	9170	9088	8837	LOC18775311
18788680	6565	5979	6368	7403	7044	7838	8001	8219	9205	10114	6722	7845	7637	6647	7070	7737	7344	9195	6534	7055	6892	6854	7279	6894	6304	6756	6591	8509	6952	8321	8654	7825	7428	7510	8564	7133	10161	9532	9673	9351	8548	8446	7991	10126	8661	8933	9568	9471	LOC18788680
18767600	8215	8063	8519	8743	9495	14453	9228	7549	9291	10379	10833	10167	9129	8491	9425	7253	6015	7145	8629	8263	9022	8378	8241	8155	9015	7924	8094	7633	7644	7314	7709	7466	7379	7473	7009	6425	7869	6335	7232	7327	6213	7201	4944	4937	5534	5748	5796	5605	LOC18767600
18775719	8051	7709	7206	7744	7531	11985	6962	6927	7904	6447	5370	5568	5941	4990	5441	5131	4978	5958	7844	7835	9073	8708	8994	7555	6172	6878	5971	6633	5918	7091	8607	7886	7260	7619	10341	7814	9423	8562	8482	11333	10743	10282	8689	9458	9624	10534	10894	10436	LOC18775719
18792373	8164	8289	8097	6970	7257	6411	8321	6886	8110	8692	8546	8675	9398	8256	9288	8530	8020	9411	7628	7437	8240	8080	8392	8439	7766	7972	8128	8693	7852	8004	7911	7393	7139	8648	8442	7260	9200	8028	8777	7367	7156	7166	6026	6511	6195	6695	6733	6561	LOC18792373
18769499	10157	8102	9401	8952	8517	6065	8660	6451	7969	6634	8106	8064	10565	11003	11354	11009	9161	11506	7179	7230	7523	8359	8531	10155	7482	9035	8789	10051	9524	8700	9061	9806	8388	4781	5585	6211	6832	8611	8621	7161	6471	6212	3400	4673	2876	3699	4175	3803	LOC18769499
18776204	1045	975	870	22207	18655	16892	6672	9364	10542	5779	3919	4703	1233	896	1586	1264	1092	2297	11465	14554	15590	8053	8039	6330	4100	3498	3876	3386	2647	3617	5223	5465	3412	7808	10313	6758	9315	9218	8035	12150	14815	13800	15752	10833	8724	13111	12220	12360	LOC18776204
18769630	6478	6088	6380	7946	7321	8182	9933	10174	10726	9971	6016	8098	7365	5861	5388	6530	6266	10463	6658	7399	8762	8512	10052	7199	5001	6023	5202	6843	5816	7618	9939	9558	7710	6804	7788	5508	8900	8541	7409	9258	11446	8542	9410	8443	8205	6420	6650	6335	LOC18769630
18788822	11516	9761	10609	11201	11212	6475	7643	5698	7303	10060	10353	12870	7173	5407	7888	6095	5694	6736	12010	10755	14505	5799	6203	6214	6299	5644	5850	5924	5677	5374	6062	6695	6585	6169	6626	5531	6328	6988	7514	6702	7030	6446	7381	8842	7448	7534	8356	7926	LOC18788822
18770920	9270	9546	9021	7934	8114	7482	8615	8035	8924	10120	8709	9083	8961	8646	9627	8335	7599	8559	8217	7746	8080	7595	7774	8389	8140	7926	7881	9498	8121	8418	6937	7232	6530	8636	8456	7960	7057	7334	8568	6095	5783	5752	4508	5030	5011	4753	4961	4402	LOC18770920
18777189	4234	3217	3525	9293	9051	7611	7197	7553	8789	5291	4510	4893	5288	4646	5207	5100	4507	6099	7622	7572	7802	8081	7863	7178	5522	5743	5609	6392	5635	6881	7128	7040	6439	7328	8306	7649	6431	9415	9660	13123	12633	11197	11062	14414	10838	12222	13381	12267	LOC18777189
18772275	6106	7002	7780	12543	11873	4950	9260	10931	11256	10354	8483	10554	6178	4687	5772	5578	4876	6076	9375	8848	10587	6688	6528	5392	6148	5741	5369	5282	4655	6447	7122	7359	6664	7556	8553	6615	6411	7235	6302	8457	7755	8290	8527	7694	9669	9198	10020	8687	LOC18772275
18785217	10303	10520	9471	8392	9302	8699	8831	7104	8463	9227	8413	8496	9640	10444	10700	8884	8101	8539	8256	6922	7703	7475	7364	8653	7435	6876	7687	9951	8819	8345	6386	7119	6713	7296	6828	6568	6827	7467	8963	5641	5593	5345	4862	5247	4556	4106	4417	4000	LOC18785217
18766256	6804	5846	6009	8667	8550	8040	7544	7157	8011	7935	6298	7656	6870	5253	6244	6115	5928	7896	7587	8067	9125	7272	8155	6447	5795	6215	5771	7274	5950	7068	7672	7664	6877	7554	7847	6315	9772	9175	8748	9536	9918	9003	9435	10242	9492	8253	8842	8880	LOC18766256
18781917	6699	7000	6579	5913	6278	4830	7602	6244	7331	9084	7582	7796	9782	9032	10326	9255	9160	8878	6434	6042	5834	7719	8053	8749	8948	8199	8960	10004	8554	9183	7247	7238	6929	9901	8969	8501	8119	8195	9707	7101	6405	6542	5964	6465	6043	5551	5818	5232	LOC18781917
18772363	10820	10651	11336	8824	8347	8101	8252	7515	8757	9217	8539	8666	7963	7337	7967	6455	5684	6281	7233	6454	7099	7136	7909	7699	7086	6736	6809	7326	6463	6595	7150	6800	6696	7307	6997	6057	7325	8274	8677	8086	7749	7247	5941	7345	5761	7491	7785	7606	LOC18772363
18779347	7462	7657	7225	9000	8949	7458	7566	7795	8396	8137	7106	7197	6340	5593	6794	5996	5547	6736	6752	6879	8860	6340	7247	5759	5956	5903	5605	7063	6020	6783	7296	7246	6439	7374	7387	6219	9786	7439	7845	8493	8460	8364	8837	9786	8518	11555	11183	11229	LOC18779347
18773534	3440	2954	3078	8332	8167	11810	12114	12627	12711	11129	7467	8977	8374	5570	5549	7255	6651	9915	7985	8402	7638	9696	10323	7714	6666	6960	6490	7899	7057	8688	10774	8970	8915	9183	12454	8366	7635	7656	6656	5120	5299	4957	3669	3914	3946	4748	4847	4798	LOC18773534
18786213	30493	20398	26870	17625	13327	6263	5865	5843	7504	6007	4725	5381	4965	4471	4651	6613	4913	8612	6095	5920	7853	4609	6140	4098	2976	3911	2773	3018	2722	3074	4563	3622	3496	3960	4217	3321	4753	4844	4315	7837	8142	7294	7944	7699	7294	13765	14270	14462	LOC18786213
18782476	4927	4552	5241	3714	4187	3484	8477	6190	7766	7327	7619	7930	11560	10066	11035	11709	11700	13018	4660	4398	3991	8189	9415	9486	9183	8945	9392	9781	8607	8577	9722	9280	9589	9986	8695	8133	7213	7737	8850	6816	6701	6865	4958	4479	4335	4194	4697	4390	LOC18782476
18781818	5891	5500	5458	8785	8963	6024	7031	6685	7331	9069	8215	9492	7884	6578	7963	7327	6665	8034	10204	9595	11431	7054	7894	7553	6390	6603	6583	7870	6608	7266	8066	7553	7103	6758	7465	7080	8771	8206	8535	8163	7720	7861	5939	6463	6095	7239	7443	6950	LOC18781818
18793814	2336	1839	2485	6510	7475	5244	6613	5703	7060	6997	6247	6555	7429	5981	6919	7385	7698	9204	8779	6780	6774	6044	6779	6169	6659	6004	6494	9003	7659	8582	9496	9513	6968	10306	10290	7674	9825	9404	8518	8053	11502	9247	11102	6801	10755	8648	8917	8710	LOC18793814
18783255	8320	8151	9588	9889	8841	5723	9328	9782	9443	10478	7757	10036	8330	8199	7271	8006	6215	8937	8480	8242	9467	7658	8312	7702	6823	6487	5674	7288	6472	7087	6788	6733	6065	6900	6560	6821	6767	7169	6774	6815	6656	6835	5162	5716	4910	6654	5778	6050	LOC18783255
18769244	18714	20470	21690	5715	5703	8955	5725	5455	5542	6943	5852	5912	6804	6007	6107	5983	5540	6858	6227	6420	5694	7240	7118	6924	4690	5193	5115	7761	6538	7719	7311	7228	6081	5003	6032	5235	6149	8005	8174	7825	7300	7170	8142	8138	7817	7198	7361	7163	LOC18769244
18774836	9375	8053	8736	11312	10194	9500	9782	9753	10973	9594	7245	8190	7534	6364	6771	7064	5900	8558	7159	7615	8422	6811	7337	5880	5494	4931	4665	5307	5148	5916	6892	6344	5880	6598	6750	5346	5965	5966	5880	7747	7278	7250	7364	7993	7987	8413	9269	8852	LOC18774836
18780619	9292	9641	9452	7041	7018	11471	7971	7000	8199	9176	8196	8608	8636	7366	8388	7197	7009	8868	7096	6860	8239	7465	7517	7791	7060	7048	6802	8028	6986	7291	6711	6632	5805	7154	7576	7195	8491	6903	7367	7064	6812	6570	5045	5755	5195	5941	5889	5764	LOC18780619
18793016	6872	7592	7953	6188	7321	7253	8549	6112	7863	9936	11132	11806	10231	9662	10080	8432	7042	8662	7470	7630	7150	7911	7810	8276	9352	8191	8451	8289	7723	7553	7122	7176	7028	8063	6144	7204	6130	6651	7604	6247	5487	6442	3924	4210	4831	4671	4498	4636	LOC18793016
18786280	9248	8305	8433	6014	6293	8002	8278	6739	8274	9339	8273	8903	9428	8139	9049	8431	8502	10263	5907	5607	6160	6683	8013	7498	7578	8205	7576	9088	7981	8154	7693	7690	7016	8802	7647	7150	6414	7467	7736	6657	6637	6822	5474	5249	5831	4530	4687	4551	LOC18786280
18784003	3189	3997	4096	5076	6388	3367	9318	7642	7401	12424	12424	13981	13348	9744	10273	9228	9410	11204	8757	7804	9255	7370	8455	7161	8934	7873	7761	6879	5970	6653	6985	6708	6052	8263	8004	6978	6565	6128	6556	7334	6513	7494	3819	3308	5337	4972	4774	5004	LOC18784003
18793862	6719	6999	6608	5962	6416	8362	7729	5887	7584	7705	7375	7637	8805	8954	9364	8786	8739	9170	6342	5615	7047	7126	7896	8525	7053	7817	7571	10182	8849	8869	7778	7937	7175	7627	7391	7429	9546	9373	10915	7233	7138	6560	4615	5986	4430	4410	4431	4187	LOC18793862
18770894	3032	2184	2504	11489	10261	2623	5457	6652	6424	5171	3860	5182	4071	3107	3483	4615	3623	6042	8240	9122	11137	6136	6326	4949	4024	4151	3642	5561	4647	6233	8462	8683	7529	4922	6042	4914	7800	9043	8225	12200	13304	11111	13901	18447	13192	14339	14421	14437	LOC18770894
18789666	9006	9218	8977	6507	6980	6692	8129	6856	7315	8601	8329	8078	9634	9528	10518	8172	7507	8151	7498	6583	7001	7960	7792	8659	7878	7430	7748	9091	8128	8765	7577	7394	7046	7998	7494	6740	6997	7272	8329	5964	5725	5809	4453	4822	4876	4194	4599	4370	LOC18789666
18773355	8141	8907	8705	8323	8255	4218	8336	7079	8597	10257	10617	10486	9564	8498	9546	7617	6779	8027	8152	7566	8457	8022	7701	7978	8694	7791	8392	7630	7266	6997	6984	7125	6832	7132	6978	6046	7372	5863	7013	6117	5832	6573	4177	4589	4501	4576	4860	4714	LOC18773355
18773084	7408	8553	8298	6513	6788	2911	8160	6655	7157	8822	9134	10679	9499	7397	8109	6996	6675	8981	9135	7741	10694	7874	8187	6869	6555	6437	6273	5879	5324	5549	7279	6291	6387	6053	6970	5600	9276	7046	7213	8628	8868	9035	7000	6445	7096	6255	6529	6022	LOC18773084
18772980	8366	8339	8279	8954	8974	10713	7568	6984	8197	8576	7255	8326	7147	6076	6789	6125	5772	6764	8605	8775	10539	7602	7988	7252	6983	6489	6293	6829	6073	6768	7675	7419	6481	7684	7589	6385	8021	7022	7266	7278	7404	7503	5810	5866	6065	5940	6153	5837	LOC18772980
18767780	6944	5053	6334	9724	10597	4724	6235	6970	8067	7909	8273	10937	6522	6399	7400	7225	5869	7088	13978	11364	16601	7691	8520	8179	6708	6170	7945	7117	6362	6582	6312	7029	6673	7281	6976	6319	7432	6525	6612	8037	5824	7525	5579	4702	4403	5501	5097	5372	LOC18767780
18782547	259	156	208	8734	8385	8395	5317	6210	5968	6298	5202	5982	2294	1402	1962	2307	1993	2805	8975	8511	9872	6152	6171	5802	4903	6037	5270	5598	4351	5735	8938	10051	7835	5157	6902	6173	12026	13104	13581	14142	14395	11273	13642	19700	11452	10446	11785	10691	LOC18782547
18773033	13464	14633	14473	7006	7097	6051	8079	7789	9369	9045	7575	7806	7435	6807	7220	6878	5879	7619	6600	6620	7635	7532	7831	6599	6671	6216	6268	6680	5799	6945	7344	6431	6031	7624	7824	6008	7332	6187	6318	6945	6323	6792	5188	4950	5529	6621	6687	6694	LOC18773033
18773637	11838	11645	11189	12943	11878	15911	8604	10130	10925	9172	6742	8556	5042	4019	4267	4217	3964	5599	7710	9116	8149	6542	6763	5278	4839	4825	4734	5321	4477	5834	6903	6498	5388	7043	8601	6235	4837	6849	6372	7176	6892	7146	6317	5100	6721	7678	7823	7531	LOC18773637
18768433	5625	6049	6269	8037	8433	9853	8412	7167	8085	9701	9197	9815	8481	7683	8336	7237	5640	7238	7994	7478	8105	7864	7442	7540	7712	6618	7027	7884	6836	7322	7419	7082	6865	7011	6425	6226	6259	6711	7162	7953	6513	7801	5407	5677	6080	6589	6273	6298	LOC18768433
18778971	7063	7177	7111	6116	6148	3266	6610	6292	7060	7301	6262	7331	7315	6049	6736	6322	6372	7548	7182	6677	7866	7124	7486	6939	6507	6676	6421	7732	6474	7380	7560	7521	6301	7677	8390	6849	10020	7688	7893	8534	8102	7978	7711	8617	7767	9700	9796	10125	LOC18778971
18772113	9322	9928	9808	6873	7351	8145	8178	6437	8066	8714	7983	8290	8579	8182	8788	7583	7124	7914	7398	6644	7523	7739	8278	8466	8175	8184	8213	8870	7982	8259	7337	7085	6733	8437	8204	7909	9042	7007	8156	5632	5271	5567	3495	3649	3848	3311	3377	3249	LOC18772113
18769540	897	657	705	18672	16396	18692	4956	7295	7718	5624	4767	5390	2327	1763	2647	1841	1821	2732	15292	17983	20204	6138	6271	5571	3879	3884	3992	3408	2680	3722	5047	5305	3951	4586	6946	4836	9069	8316	7819	10960	12698	11599	11426	10723	8120	10041	10072	10004	LOC18769540
18766879	8444	8358	8221	8133	7740	10185	7782	7635	8186	9011	7299	7723	7553	6603	7317	7160	6384	7737	7452	7624	9107	7373	7612	6768	6328	6004	6180	7097	6129	6835	7173	6878	6192	6865	7665	5771	8699	7035	7153	7513	7418	7097	5943	6321	6209	6100	6403	5929	LOC18766879
18768270	8229	7734	7640	6009	6428	5265	6789	5672	7010	7973	6974	7813	8143	6579	7908	7538	7244	8550	6426	6051	6963	6794	7836	7331	6826	7049	6855	8367	6974	7907	7447	7345	6639	7994	8218	7096	8378	8157	8221	7930	7537	7610	6715	7257	7050	5854	6379	6292	LOC18768270
18787178	7197	5916	6634	6269	7331	3023	8851	5498	7871	8783	10582	9050	10052	10679	12235	9003	8434	7799	7578	6125	7513	9117	8943	12145	10877	9885	10502	10256	9584	9040	7219	7771	7258	6721	6656	7599	7625	7005	7542	4585	4376	4293	1692	2380	1910	1507	1899	1407	LOC18787178
18787068	7789	8402	8379	6527	7200	5691	7677	5766	7410	8268	9300	8817	9906	9035	10011	7483	7406	7885	7257	6527	6716	7640	7634	8595	8903	7861	8690	8539	8171	7278	7027	6919	6773	7990	7052	6914	7099	6344	7687	6230	5862	6257	3960	4499	4645	4528	4529	4552	LOC18787068
18788417	9485	9275	9640	5620	6021	5758	7985	6594	8125	7900	7396	7556	9695	9409	10731	9013	8208	9340	6532	6072	6934	6974	7554	7508	7641	7285	7384	7781	7023	7385	6628	7024	6349	8182	7943	7353	7021	6136	7169	5556	5486	5682	4262	3970	3940	5262	5143	4943	LOC18788417
109950727	10369	9389	12439	10439	9843	7021	9515	8510	9667	9820	8530	11239	7249	7878	6985	6191	4721	7458	7611	8761	9239	6666	8451	7206	8643	7707	6290	6624	6316	6338	6618	6591	6177	7654	5343	6135	5158	5820	6103	5618	4815	5947	3507	2993	3019	4911	4195	3991	LOC109950727
18768537	6446	8775	9509	8530	9705	5600	7039	8185	10717	12788	14334	12257	7800	5252	7953	7225	6490	8017	5926	4225	4705	4922	4879	3807	7038	4867	4924	3430	3008	5011	4394	5140	3581	6189	6831	5654	4017	3974	3544	10481	6911	9869	3571	2226	4531	16256	15091	14445	LOC18768537
18787621	54870	57104	55345	16598	15369	24727	3239	4698	3886	6940	6305	9016	1122	643	1078	557	416	2460	4559	5644	6789	1261	1260	1135	440	321	460	349	225	396	2511	2574	1434	507	537	350	3442	3173	2459	3395	5094	3757	6170	3680	4350	2902	3211	2952	LOC18787621
18769754	6512	6839	6588	7545	7916	8113	7922	7592	8263	8045	6879	7203	7054	7125	7574	7234	6199	7264	7991	7263	8137	6917	7765	7607	7229	7356	6784	8203	7491	7771	6761	7235	6502	7766	8620	8767	8258	7108	7322	6556	6346	5856	4519	4931	4474	5280	5186	4976	LOC18769754
18773762	5133	5133	5024	7634	7407	14613	7571	7302	8407	8053	6783	7756	6567	5418	5986	5774	5110	6904	7854	7800	9409	7405	7362	6849	6209	6110	5732	6029	5576	6159	6880	6351	5871	6373	7812	6191	8978	6705	6754	8371	8862	7934	6704	6944	6223	7384	7649	7726	LOC18773762
18771989	6904	6163	5641	6664	6952	13839	7002	6387	7426	7999	6988	7821	6933	5843	6531	6322	5939	7402	6132	6138	7160	5902	6430	5937	5848	5870	5727	6963	6040	6858	6957	6928	6153	7123	7384	5714	8367	7369	7976	8809	8708	8209	8022	8679	8128	6506	7144	6652	LOC18771989
18770340	16220	16930	17746	7234	6829	8948	6837	6253	7286	7714	6910	7156	7385	6706	6731	6929	5916	7382	7454	6684	8207	6957	7577	7090	6246	6440	6053	6541	5979	5984	6294	5920	5473	6804	7126	6062	8148	5567	5727	5295	5048	5026	3771	4062	4310	4979	5044	5115	LOC18770340
18777306	7800	10320	8932	7831	7657	4681	12519	10808	10999	9949	6579	8243	11470	13291	11070	8684	7975	8812	5775	6524	7303	8203	7950	8939	5399	6093	5911	8858	8522	8708	6121	6349	6139	5197	6150	5762	6308	7225	7400	3758	3451	3809	2238	2534	2093	2128	2396	2342	LOC18777306
18768828	8965	8425	8466	7148	7694	5225	7260	5925	7723	7982	7881	8347	7288	6130	6986	6448	5796	7184	7919	7823	8506	6588	7097	6008	6512	6419	6115	6339	5848	6225	7202	6857	6077	6650	6681	5507	6589	6785	7007	7729	7193	8034	6367	6376	7017	7006	7162	6908	LOC18768828
18777693	4233	4332	4174	8067	7951	9308	6647	6310	6868	7635	6682	7097	5876	4948	6176	5256	4855	5545	6908	7197	7982	6681	6769	6511	5772	5402	5726	5658	4955	5456	5814	5803	4960	6974	7331	6344	8590	7646	8067	10134	10262	9807	9320	9304	8152	9638	10197	9828	LOC18777693
18777222	9732	10206	10511	4978	5488	4163	6540	4724	6207	6485	6372	6401	7447	6984	7710	6460	5833	6649	7611	5698	6364	6991	7099	8429	8802	8128	8719	9890	9149	8243	6866	6795	6711	9677	8192	8637	8077	7055	8708	5525	5281	5527	4562	3955	5485	5419	5263	5175	LOC18777222
18772066	747	800	880	8272	9531	6371	6058	5808	6357	9021	5968	7034	4413	3773	3596	4948	3565	5086	10726	7816	7572	6715	6481	4709	5365	4008	4162	7404	6088	7230	7274	8557	5978	10208	10908	6197	6690	9240	10021	8643	14596	8775	11655	11133	12511	7032	6874	6563	LOC18772066
18774433	8822	8890	8817	7235	7220	9705	7195	6021	7344	8960	8371	8871	7890	6743	8028	6387	6020	6840	5705	5560	6950	5679	6274	5823	6743	6514	6113	7279	6292	6256	6472	6676	6127	7298	6038	5575	7753	6334	7530	6939	6452	7501	5815	6718	6298	6208	6456	6297	LOC18774433
18785174	6983	7841	8349	5916	6764	2454	6190	5847	6499	5877	5390	6128	6141	5383	6270	6573	5995	7207	9008	7360	8441	5527	6855	5337	6362	5815	6590	6776	6344	6464	5710	6872	4855	10110	7869	6565	7822	7144	8047	8096	7616	7888	7210	5860	8032	10021	10309	9922	LOC18785174
18774721	8293	7638	7373	6144	6248	3602	6833	6377	7608	7253	6536	7230	7694	6471	7605	7326	7362	9003	6615	6386	6464	7021	7569	6334	6079	6350	6172	7182	6272	7006	7346	7335	6655	7248	7648	6039	6460	6963	6961	7204	7009	7111	6155	6689	6748	7632	7777	7562	LOC18774721
18792917	7554	7465	7918	7088	7830	8204	7245	5362	6904	8892	9192	9345	8419	7081	8183	6199	5528	6519	8310	7925	9065	7459	7398	7385	8559	7678	7859	7684	6833	6596	7053	7148	6412	7200	5967	5851	7514	5891	7202	6248	5825	7083	3809	4056	4577	4239	4374	4254	LOC18792917
18787343	3739	3381	3463	9280	9162	3435	6581	6877	7366	5895	6049	7032	4870	4785	5337	4911	4351	5339	10751	9820	11736	7135	7303	7512	6036	6231	5951	5737	4783	5846	6294	6153	5891	6639	7763	7903	7028	8803	9003	10548	9281	9655	6980	8380	6070	7727	8696	8733	LOC18787343
18784492	9543	7732	8333	4361	4865	2114	6257	3844	5732	5784	7670	7502	9612	8580	9458	8163	7761	8554	5927	4827	6768	5989	6691	7358	6661	7172	6791	9418	8295	8536	8278	8192	8810	5988	6341	6756	8559	9880	9754	7092	6691	6792	5061	7173	5269	3188	4025	3689	LOC18784492
18786141	6184	5498	5853	7351	7218	8841	6301	5910	7075	6876	5367	6240	5161	4341	4906	5066	4886	6145	6399	6311	7937	5660	6398	5320	4730	5137	4490	6037	5101	5984	6532	6492	5407	6457	6784	5261	8191	7905	7970	9398	10252	8963	10973	11398	10244	9622	10506	10223	LOC18786141
18769176	16920	18380	17187	12963	11385	11846	9096	10794	11086	8241	4985	6772	4213	3504	3373	3890	3417	5025	6920	7924	6464	5403	5620	4487	4015	3635	3626	3871	3524	3840	5280	4893	4402	8877	9330	7055	4073	5909	5178	6073	5720	5688	4596	4180	4021	7664	8071	7685	LOC18769176
18780683	8514	7304	7492	6369	6600	4869	7109	6199	7316	7653	6718	7708	6860	5458	6669	5741	5723	6815	5105	5100	6826	5264	6544	5448	5594	5995	5209	6742	5607	6051	6628	6746	6405	7123	6093	5491	9442	7259	7958	8482	8655	8704	8480	9546	8941	7435	7630	7456	LOC18780683
18788541	7488	7399	7537	6142	6566	5239	7509	5757	7348	8184	8026	8382	8148	8011	8604	7816	7135	8306	6562	6299	6559	7245	7693	7796	7418	7558	7619	8325	7479	7457	6696	6952	6547	7626	7406	6480	6321	7061	7879	5819	5609	5621	4392	4801	4517	4000	4443	4163	LOC18788541
18769922	6953	7517	7905	5952	6690	2990	8147	6002	7312	8161	9131	9577	9831	9652	10149	7673	6850	8144	6956	6186	6027	7256	7111	8473	8870	8506	8410	8578	7866	7186	6477	6518	6506	7699	6292	7135	5112	5966	7278	5318	4917	5429	2876	3192	3525	3807	3665	3675	LOC18769922
18793532	1015	830	855	6048	5941	2077	4046	3588	4501	4392	5236	4349	3283	2883	4085	3271	2932	2974	7170	6138	7708	6074	6076	5222	5416	5231	5126	5786	4738	5612	6322	7253	5739	7156	7535	6810	10924	11278	10767	14023	12863	12026	12946	15875	10938	12113	14273	13457	LOC18793532
18793697	11893	14142	14231	4733	5585	5165	7252	5311	6186	6022	5474	5472	8940	9824	11013	8517	7844	7879	6020	4272	4714	5763	6030	7131	5944	6045	6626	10957	9612	9816	5106	5797	5441	6230	5016	5269	7217	7432	9950	4059	4278	3772	6263	4883	4437	3756	4227	3243	LOC18793697
18771511	4713	5274	5537	5904	6729	7529	7028	5267	6430	9084	9450	9658	8441	7849	8798	6868	6069	6951	7164	6416	7510	6919	6646	7427	7908	7724	8122	7929	7431	6718	6467	6665	6268	7172	6017	6426	6690	6351	7687	6671	5903	6984	3932	4424	4535	5472	4955	4798	LOC18771511
18773161	7950	8429	8679	4998	5694	3787	7440	5042	6820	8683	9743	9590	9435	9029	9654	7831	7171	8042	6613	6183	5777	7138	7176	8136	9129	7954	8347	8265	7710	7335	6879	6925	6891	7772	6077	6235	5358	5725	7158	5237	4458	5394	3155	2958	3527	2894	3160	2956	LOC18773161
18784579	736	236	613	14494	14503	15945	8056	7005	6886	7566	8298	10053	9172	8105	9410	7714	7149	8796	11868	10741	12195	8706	8083	10450	6057	9255	7462	8613	7326	7471	7454	6821	7452	4393	4180	4842	5371	6687	6740	3608	2741	3316	649	1130	638	470	558	380	LOC18784579
18788878	6418	6221	6366	10422	9807	9125	7082	7872	8658	6849	4962	6165	4148	3370	4170	3960	3265	4625	7443	8481	9725	5428	6121	4588	3945	4022	3764	4264	3516	4295	5563	5022	4459	4949	5385	3938	7963	6768	6886	8375	8581	7729	10757	11270	9559	10900	11127	10607	LOC18788878
18787602	595	698	495	3906	4346	3027	3857	1655	3215	4435	4746	4127	7883	7832	9972	5733	5737	4145	4049	3426	4170	6975	6875	9357	8893	10163	9580	9011	6699	7595	6403	6321	8422	7579	7678	8896	14010	9899	13112	9248	10334	8140	10685	9774	8342	5675	5535	5180	LOC18787602
18788515	8152	9172	9623	2983	3611	2371	6443	3927	5120	4258	4594	4178	8481	7365	8125	6729	7631	8346	5218	5350	4776	7512	8090	9558	7789	9392	8302	9093	8073	8643	8583	8058	7489	6943	8576	8657	8212	8447	8329	6185	7024	6625	4207	3976	3759	2876	3183	3138	LOC18788515
18789608	3730	3326	3374	8283	8361	8415	4056	4237	4691	4613	4352	5004	3680	2942	3538	3032	3143	4118	8574	8362	11009	5385	5924	4622	4342	4365	4426	5061	4393	5051	6936	7053	5907	5586	6011	4465	8765	7871	7780	10698	11262	9871	11595	13969	10820	10853	11681	11344	LOC18789608
18768023	7818	7655	7489	7880	7673	8071	5740	5846	6692	6601	5302	5997	5456	4417	4858	4784	4436	5708	6962	7589	8085	5828	6237	4915	4441	4402	4256	5389	4537	5335	6275	5897	5526	5962	6486	4548	7265	6835	6871	8021	8393	7341	8852	9937	9148	8915	9395	9233	LOC18768023
18782083	7932	8829	9378	5624	6273	4177	7919	5352	7201	8719	9735	9486	9425	9060	9988	7564	6572	7573	6390	5725	6522	6687	6703	7578	8900	7604	8190	7558	7248	6735	5775	6094	6034	7199	5443	6236	6230	5649	6994	4550	4183	5001	2812	3079	3043	3362	3089	2979	LOC18782083
18787828	3866	4375	4018	7673	7422	8833	6803	7194	7915	6449	4577	4763	5500	4845	4827	6102	4814	5829	7074	7484	6970	7706	7374	5778	5142	4463	4742	6699	5354	6952	6311	6047	5222	8580	8986	6128	6073	7115	7212	8459	8064	7360	7305	8357	7549	7950	8182	7797	LOC18787828
18788968	13279	11198	11958	14086	11481	6056	1336	1550	1949	3608	4327	4748	1312	1111	2704	1559	1275	1130	5842	5312	7691	1652	1892	1590	1235	950	1116	2051	1550	1669	1680	3163	1803	3114	4082	4663	6559	6589	6696	11655	10567	8285	14381	23385	14582	20851	23256	21498	LOC18788968
18782301	2968	2932	2879	10346	9490	4807	6576	7110	9045	5870	4664	4957	4164	4159	4450	3998	3470	4046	7638	8252	8622	5867	5940	5014	4433	4105	4061	4512	4001	4828	4834	5091	4504	6087	6971	6015	6626	6634	6942	8960	9517	9274	9638	10012	8335	12431	14279	13840	LOC18782301
18781012	6905	7148	7908	6378	7161	3874	7451	6043	7427	8878	9604	9057	8834	7985	8903	6837	6410	7090	6993	6333	6451	6845	6780	7543	7710	7037	7530	7361	6917	6444	6212	6350	6205	6622	5786	5716	5879	5718	6675	5635	5035	5913	3372	3853	3992	3953	4040	3930	LOC18781012
18783083	9023	11526	11274	5840	6666	4754	7186	6014	6671	7542	6990	7052	8808	8641	9976	8650	7467	7638	8005	5966	6534	6099	6054	7271	6696	6462	6642	7828	7283	7111	4946	5133	5011	6849	6691	6804	7481	5695	6905	4707	4366	4207	3276	3484	3898	3228	3304	2937	LOC18783083
18786576	3478	5614	4223	12076	11613	15882	9576	10476	9113	22538	14304	18995	7239	4322	4464	3549	3257	5119	5896	6610	7302	3844	4053	3902	4168	3753	3973	4421	3864	4250	5363	4923	5231	3777	5227	4045	9452	9125	7755	6057	5226	4531	3517	5433	3633	2368	2458	2321	LOC18786576
18772817	2365	1668	2166	4116	4623	1870	7872	5608	7097	5422	6159	6283	8914	8669	8257	8197	7550	9815	7139	5918	7097	9359	10148	10109	7782	8374	7859	8699	8142	8179	8066	7659	7664	6633	7015	7271	7487	7308	7352	5524	5874	6034	4360	4081	4124	2890	3311	2895	LOC18772817
18791765	28059	32705	34661	3740	3627	3329	5426	3774	4410	5710	5237	5151	6988	5806	6099	6014	6357	7179	3645	3197	2527	3568	3894	4216	4133	3815	4238	5278	4417	4374	4472	3968	4149	5201	4979	4312	3281	4856	5266	5855	5397	4497	5461	5503	7016	4968	5254	4704	LOC18791765
18789027	417	228	335	3394	3855	3676	6952	4855	5855	7138	7946	8088	10003	9584	10103	8861	8719	9224	4812	4550	5381	6708	7342	8410	8277	8550	8583	11756	9680	9903	8762	8962	9254	5778	5712	6135	6933	7834	8167	7301	5665	7239	3101	5495	2485	2197	2531	1883	LOC18789027
18791438	2427	2426	2196	5415	4699	5886	9343	9914	12986	15515	10121	10295	6875	5748	5623	6789	6816	10194	5014	4961	5024	7087	7550	5837	5909	6550	5882	5959	5612	6793	7077	5497	6012	5049	6945	4563	5142	5908	5214	6230	6161	5794	6213	6192	4770	4957	5697	5270	LOC18791438
18789270	6262	6259	6083	6345	6561	6541	7048	5953	6961	8429	8293	8402	7827	6901	7637	6469	5690	6752	6565	6032	7358	6752	7085	7096	7522	7400	7312	7554	6997	6581	6645	6462	6060	7136	6211	5970	6975	5925	6656	5960	5713	6340	3734	3962	4006	3490	3464	3465	LOC18789270
18790018	473	151	336	6171	5413	6920	6119	3630	5325	4086	4315	4351	6460	7379	8122	7241	6775	7509	4646	3997	3627	10041	9130	15356	6182	9562	9031	13782	10398	10420	9653	9053	9889	5766	6235	6987	10109	14019	14666	5856	4865	4005	1215	3797	745	987	966	699	LOC18790018
18790213	18206	16499	16705	16123	13991	24089	7934	9564	10289	6649	4319	4938	3801	3014	3087	3274	2695	4495	7025	8931	9850	6094	6454	4747	3431	4021	3377	3193	2935	3867	6066	5017	4645	4330	4907	3551	4946	4687	3551	3989	4184	4053	3550	2753	2823	3287	3306	3158	LOC18790213
18768561	7192	8247	7852	5999	6313	7253	6765	5431	6730	8807	8688	8609	8106	7363	7864	6976	5812	7264	6944	6356	7020	6791	6838	7033	7735	6969	7205	7643	7040	7206	6661	6438	6352	6484	5326	5256	5012	4738	5474	5354	5103	5684	3450	3812	4021	3461	3459	3695	LOC18768561
18776004	8388	8698	8161	5841	5878	6231	6645	5873	6549	7459	6446	6857	7926	6927	7730	7347	7110	7989	5697	5296	5850	6246	6829	6624	6137	6065	6379	7646	6449	6946	6302	6266	5946	6642	6295	6053	7128	6309	6411	5710	5403	5157	4165	4897	4433	4479	4971	4736	LOC18776004
18777292	6901	6428	6735	5664	5971	6743	6557	5988	6930	6925	6119	7051	6739	5761	6467	6150	6295	7738	4994	5122	5858	5295	5954	5450	5212	5560	5038	6490	5469	5956	6085	5888	5480	6716	6509	5875	6367	6803	7338	7242	7145	6937	7331	8021	7295	6931	6779	6901	LOC18777292
18789170	2117	2586	2338	17321	14108	16299	6658	7987	8883	7198	5074	5983	2848	2444	3135	3390	2880	3894	7897	9470	9655	5112	4777	4221	3384	2882	3265	2783	2302	2924	3792	3860	2970	4321	5283	3798	4469	4932	4548	7448	7320	7598	8886	8850	8202	14149	15285	15018	LOC18789170
18791812	7644	7433	7392	6374	6743	7982	5914	4989	6002	6998	6843	7381	6262	5538	6350	5782	5346	6338	6075	5876	7365	5761	5662	5619	5685	5565	5541	6365	5454	5898	6266	6327	5608	6236	5885	5090	6934	5921	6793	6909	7082	7450	6274	6761	6944	6501	6668	6374	LOC18791812
18774977	20410	16196	18100	11137	12189	7839	5182	3701	5073	7705	8323	9983	6608	5163	8192	4941	4624	4592	9124	7849	9222	4300	5077	5921	5019	5341	5437	4630	4400	3808	3565	3742	3949	5502	5759	5599	4780	5391	5665	3493	3620	3269	2371	2707	2652	3372	3473	3254	LOC18774977
18769601	7417	7665	7468	6089	6391	7870	7097	6423	7196	8590	7352	7530	8074	7917	8490	7337	6952	7216	6556	5683	6432	6317	6724	6667	6836	6392	6520	7887	6691	7051	6075	5755	5717	6748	6643	5949	6656	5605	6224	4934	4701	4758	3092	3516	3321	3123	3307	3178	LOC18769601
18772859	8113	8560	8711	5649	5996	5941	6920	5644	6608	7515	7168	7441	7913	7878	8234	7015	6368	7443	6533	5576	6549	6683	7075	7104	7141	6721	7144	7379	6888	6753	6001	6025	5650	7105	6411	6114	6757	5741	6699	4639	4491	4563	3081	3388	3343	3517	3334	3460	LOC18772859
18773117	4908	4566	4509	5528	5994	4716	7132	6039	7315	6391	5398	6072	6355	5469	6143	6295	5965	7070	5618	5408	5696	6081	6813	5769	5267	5875	5340	6397	5394	6382	6715	6063	5941	6941	6980	5867	6462	6846	7063	7799	7729	7205	6271	7573	6547	7331	7495	7787	LOC18773117
18766937	7623	6886	7316	4808	5235	5473	6001	4934	5911	6330	5696	6870	6751	5167	6528	6034	6079	6909	5326	4683	5965	5543	6630	5777	5336	6003	5597	6576	5622	5837	5732	5628	5223	6874	6499	5910	7093	7260	7757	7800	7816	7190	7948	8005	8121	5192	5540	5386	LOC18766937
109948408	10	108	13	26141	39861	27119	17728	6831	15140	8984	10958	6259	4089	4919	9144	6116	4272	3426	14646	5285	6728	1914	2489	2553	2272	3551	2015	5361	4007	5882	2238	2921	2803	2384	3082	3519	2110	5125	4935	1725	2266	1803	4668	4262	2929	1484	2121	1640	LOC109948408
18773003	4861	4997	4770	5016	5244	5829	5465	5495	6028	7133	6305	6670	6530	5392	5907	5830	5115	6279	5250	5050	5804	6134	6530	5871	5588	5490	5359	6499	5314	6439	6610	6627	5958	6075	6881	5341	8008	6668	7127	7963	7782	7319	6775	7746	7298	7560	7991	7490	LOC18773003
18767549	7816	8343	7875	5005	5156	3535	6684	4620	6246	6576	7004	7228	8457	7839	8974	7656	7418	8239	6007	5823	6298	6480	6902	7447	7183	7014	7152	7568	6829	6404	6217	5964	5891	7359	6726	6241	7102	6100	7039	4694	4614	4697	3291	3641	3515	3185	3489	3382	LOC18767549
18788050	9400	8107	8322	10330	9633	9098	7830	8242	9169	8876	6763	7176	5525	5017	5323	5770	4230	5628	7107	7426	7349	6176	6726	4745	4851	3987	4205	4490	4276	5188	6232	5384	4894	5302	5438	4291	4648	5076	4917	5982	5857	5621	6032	5267	5539	5453	5873	5719	LOC18788050
18776650	7788	7880	7460	8173	8089	10515	7177	6817	7875	7979	6907	7317	5676	5299	5598	4898	4382	5529	6996	6970	8731	6411	6830	6420	6265	6039	6039	6271	5730	6042	6655	6182	5993	6001	6316	5010	8013	5321	6056	5337	5235	5743	3829	4000	3837	3317	3574	3451	LOC18776650
18787176	7393	7119	7032	5714	5808	4881	5800	5008	5920	7270	6870	7195	7057	5749	6822	6190	6083	6713	5506	5074	6042	5431	5734	5479	5685	5180	5458	6172	5246	5545	5512	5876	5160	6348	5722	4943	6610	6491	7227	7035	6758	7188	6346	7494	6582	6648	7269	7019	LOC18787176
18767734	7055	7624	8247	4534	4561	1180	5964	5364	6166	6954	5448	6393	7321	6261	6419	7166	6449	8112	5173	5348	5222	6026	7137	6113	5686	6213	5525	6559	5766	6769	7081	6626	5746	6657	6977	6088	6652	6387	6732	6752	6811	6820	5471	5449	5768	6004	6217	6202	LOC18767734
18784998	3593	3428	2895	8732	8582	9193	5328	5623	6800	5634	5302	5010	4546	4261	4867	4501	3818	5268	6049	6295	6666	8703	9026	7814	6136	7036	6950	6763	5714	6685	7648	7475	5734	5694	6080	4413	5183	5579	5647	8915	8098	9098	5887	5637	4838	6243	6383	6288	LOC18784998
18769834	6378	6750	6129	8456	7977	15658	6667	6698	7434	7024	5221	5575	5497	5159	5442	6001	5263	6056	5964	5930	6926	6408	6581	6300	4998	5307	5030	6941	5858	6573	6949	6030	6019	5703	6714	5280	7170	6418	6584	5595	5554	4937	4275	5198	4424	4125	4374	4099	LOC18769834
18777134	5762	6139	5499	6076	5547	8733	6551	7150	7842	6165	3499	4093	3923	3044	3133	4540	3751	5651	3628	3921	3980	5972	6271	4371	3764	3908	3469	5672	4526	5566	6516	6316	5362	5769	6460	4523	7237	5942	6248	7449	8111	6097	10669	11376	8910	12098	12039	12295	LOC18777134
18776974	1241	1181	1043	5962	5575	5688	8761	8962	11303	5512	3250	3952	3664	2987	2851	4221	3350	6312	5041	5811	5359	6710	7843	5218	4768	5724	4843	5931	5257	6948	6909	5770	5188	6677	8232	6214	4507	5520	5343	7938	8048	6946	8389	10525	7421	11849	12164	12377	LOC18776974
18769583	7410	6150	6400	8677	8635	5660	6150	5968	6648	6158	5328	6199	5675	5922	5637	6858	5581	6918	7495	6946	6933	6725	6361	6046	5080	5575	5474	7189	6236	7732	6746	6751	6065	5610	6419	5941	4303	7624	7072	6084	5188	4956	4386	5386	4789	3909	4547	4405	LOC18769583
18767748	6513	6380	6617	6863	6700	8753	7171	5687	7178	8227	8283	8630	7447	6601	7452	6217	5076	6606	6455	6177	6128	6559	6406	6236	6858	6129	6240	5966	5789	5581	6418	6316	5780	5593	4741	4527	3827	4914	5909	6108	5125	6320	4142	4281	4898	4418	4920	4753	LOC18767748
18782357	7402	7595	7664	5650	6419	3868	6566	5123	6639	7605	8375	8400	7835	7827	7912	6594	5570	6143	6473	6023	6946	6399	6666	6742	7048	6332	6587	6682	6024	6023	6067	5795	5250	6171	5560	5420	7567	5340	6011	5578	5007	5636	3434	3557	3586	4044	4163	3929	LOC18782357
18790922	7616	8161	8326	3773	4206	3513	5602	5084	4634	7408	6288	6739	11382	7928	8341	7518	7822	9243	4533	4259	4471	5754	5777	5911	5475	5546	5468	6501	5407	6907	6616	6386	6047	5917	7271	6804	6765	7036	7249	7621	5765	6759	3153	3457	4603	3887	4148	3880	LOC18790922
18774536	9906	8987	10048	11039	9399	5739	5693	6617	7495	5535	4016	4465	3880	3671	3351	4378	3599	5602	8506	9631	10497	6180	7044	4909	4406	4376	3685	6272	5637	6359	7705	6811	6075	5959	5704	4665	6318	6707	6082	4603	4845	4284	4875	5368	6092	5072	5024	4670	LOC18774536
18778278	4192	4412	4043	7900	8103	10300	7458	6990	7431	7509	6006	6847	6233	5254	5720	5456	5019	7168	6035	6241	6747	8450	9333	8391	5758	7348	6762	7250	5874	6472	7780	6814	6430	5554	6096	4879	7056	6995	7048	5579	6225	5251	3107	2916	2688	1902	2077	1911	LOC18778278
18780174	1089	559	837	3101	3448	2003	3635	3152	3267	5202	4138	4483	5138	3184	3327	3808	4729	6840	4174	3839	4056	5291	6939	5086	3659	4292	3696	6299	5766	6892	7736	7604	6654	7824	8296	5787	10595	11060	10789	10587	12786	9186	10129	9384	11381	9960	9487	9768	LOC18780174
18788671	9053	6314	9574	3955	3340	923	1851	2464	3313	2388	2562	1527	6961	4269	5797	9108	5023	5576	6548	3794	3737	5776	4981	4633	12976	5956	7110	4700	4364	6351	6389	6340	9949	14219	11442	9871	1566	2951	3545	12557	6423	12224	2023	3116	4136	10304	9308	9548	LOC18788671
18767669	12445	13021	13579	11613	10929	18581	10000	11050	11477	6712	4718	6748	5597	4697	4462	5328	4174	5312	6874	7729	6121	4686	4507	3509	3553	3003	3237	3811	3295	4268	3842	3706	3484	6417	6785	4932	2403	3711	3517	4405	3406	4295	2537	3342	3090	5074	5233	5186	LOC18767669
18778546	10715	10006	10042	8848	8228	11624	6375	6962	7985	6949	5132	6118	6059	5228	4193	4715	4387	7045	4882	6086	5018	4781	5347	3966	3732	3447	3202	5521	4924	6155	5891	5417	4837	6221	7603	4709	5054	5998	5191	5781	6589	5531	4790	4624	5074	6268	6698	6417	LOC18778546
18779350	7867	6741	7648	6879	6437	5453	6347	6481	7019	5856	5320	5701	5877	5533	5407	5661	4543	6312	5880	5983	6335	5958	6528	5222	4810	4680	4543	5524	4989	5661	6264	5783	5066	5660	6026	5286	6463	6230	5969	6499	6899	6447	5816	6293	6352	7125	6913	7113	LOC18779350
18779605	6639	6771	6468	5787	6290	7621	7598	6187	7184	7942	7146	7544	7115	6704	6794	5414	5209	6134	6611	6008	7011	7231	7349	7169	6454	6738	6375	6581	6001	6326	5993	5972	5619	6348	6428	6085	7615	5574	5821	4932	4591	4727	3071	3164	3169	3000	3008	3105	LOC18779605
18784056	29772	40513	42734	11674	9554	10705	4149	3640	3935	4793	5363	5241	3357	2379	2689	2126	2206	3247	4664	3567	4182	3097	2786	2884	2369	2994	2254	4547	2915	4863	3769	3612	3019	2499	2699	2891	2939	3611	2960	3051	3587	3487	7699	2408	3927	2529	2262	2451	LOC18784056
18776768	1239	1550	1222	5476	5253	5695	6556	5809	5165	9774	10302	11217	8570	6218	7348	7323	6949	8905	6401	6019	6002	6253	6723	5933	7108	5997	6543	5462	4895	5547	6743	6990	5760	6125	6580	5078	3498	5484	5256	7595	7635	8109	5266	3551	4877	3950	4162	3967	LOC18776768
18772238	6346	6961	6588	6248	6651	3744	6919	5388	6689	8474	8557	8980	8560	7290	8323	6714	5929	7440	6146	5786	5508	5930	6079	6178	6580	5754	6163	6090	5674	5809	5299	5406	5291	5746	4892	4859	5203	5019	5959	5494	4725	5987	3709	4071	4453	4268	4568	4277	LOC18772238
18767664	3135	4336	3791	2664	3333	2364	5450	3005	4241	4046	4263	4235	7330	8964	9393	8172	8665	7147	4169	3248	4607	6256	6383	8506	5738	6795	7044	12202	9979	9768	6465	6611	7200	5720	5363	6019	11408	10996	13201	5722	4915	4095	3327	6437	2572	2540	2655	2179	LOC18767664
18770435	3124	2997	3304	6339	6294	7799	7441	6422	7046	7233	7124	7148	7592	7288	7525	6534	5269	7434	5968	5507	6993	6565	6855	6772	5741	6168	5698	7434	6872	7188	6746	6488	5948	5610	5069	5158	8234	5599	6041	4832	4800	4498	4014	5714	4093	3847	3747	3639	LOC18770435
18778077	7666	8067	8301	6381	6273	5099	6129	5696	6716	6580	5480	6375	5529	4857	5184	4985	5168	5927	5899	5687	6525	5316	6280	5522	5079	5217	4811	5629	4903	5658	5668	5516	4667	5774	6604	5442	6950	6470	6772	6252	6324	6077	5723	5935	5929	5965	6105	6252	LOC18778077
18788077	6270	6271	6609	5988	6319	3090	7105	5575	6821	7756	8231	8049	8023	7636	8172	6814	5583	6468	6102	6132	6480	6586	6071	6550	7159	6433	6450	6733	6338	6155	5865	6089	5653	6074	5067	5281	4963	5396	5907	4976	4399	5421	3411	3701	3488	3835	3805	3552	LOC18788077
18774590	6491	5625	5864	4868	5367	3616	5233	4217	5236	6652	6703	7311	6853	5413	6619	5221	5253	6084	5498	5386	6332	5484	6524	5884	5955	5967	5955	6641	5713	5964	6257	6036	5668	6911	6139	5483	7799	6568	7081	6512	6297	6676	5311	5802	5696	4993	5265	5581	LOC18774590
18788709	12849	12037	11421	7956	7444	19605	10199	9874	11364	13519	7900	9144	4981	3314	3359	4433	4343	6710	4239	4944	4398	4104	4590	4117	4155	4583	4357	4147	3567	4136	5184	4490	4247	3280	4272	3418	3297	5681	4729	5024	5143	4152	4138	4018	3870	2163	2495	2280	LOC18788709
18785035	6509	6409	6151	5196	5647	5661	5592	4937	5914	5872	5050	5466	5653	5345	5962	6149	5915	6465	4561	4345	5490	5151	5717	6139	5050	5626	5358	7186	6126	6317	5756	5695	5184	5843	6343	5517	9226	7651	8289	6718	6794	5889	5656	7003	5017	5141	5484	5098	LOC18785035
18778311	6188	5906	6006	5941	6051	6457	6262	5885	6692	6571	5402	6112	5854	4722	5451	5366	5056	6252	4514	4840	5799	5084	5891	5177	4860	5140	4713	6061	5050	5550	6095	5943	5300	6071	6246	5388	7251	6842	6870	6916	6806	6528	6345	6622	6473	6006	6352	6070	LOC18778311
18768260	14948	14343	13348	9060	7267	13119	8012	8307	9270	6509	3799	4503	4163	3069	3395	3351	2670	4450	4684	5570	6791	5488	5730	3875	2972	3111	2834	3730	3266	4550	5928	4960	4817	3944	5127	3014	4811	3719	3541	5629	5710	5229	6226	7291	6189	6662	7107	6869	LOC18768260
18791990	10922	11674	11356	5868	6146	5044	5656	5294	6120	7252	6545	7366	6514	5669	6356	5525	5082	6200	4960	4981	5765	5210	5746	5501	5190	5293	5294	5856	5091	5534	5775	5506	5123	4829	5343	4726	5970	4998	5129	5336	5170	5382	4452	4819	4795	5574	5441	5475	LOC18791990
18780066	15081	16773	16690	6315	6876	5944	5335	4805	5196	6686	6352	7191	6122	5257	5942	4991	4460	5417	6563	5750	6288	4997	4968	5210	5250	4855	5056	4962	4384	4754	5000	5023	4425	5514	4960	4530	4053	4808	5322	5145	4444	5073	3704	3684	4366	4643	4962	4583	LOC18780066
18790735	5569	5854	6264	4892	5371	7605	6653	4641	6347	7066	8199	7789	7323	7200	7811	6140	5411	6268	5927	5433	5864	6162	6374	6631	7542	6845	6930	6874	6550	5884	6211	5863	5450	6152	4960	5371	5618	5142	6215	5475	4976	5601	3340	3519	3832	3628	3886	3607	LOC18790735
18777234	7586	7110	7427	4897	4938	3971	6267	4984	5971	5604	5545	6084	7034	6048	6826	6427	6253	7548	5831	5710	6451	5563	6205	5980	5634	5970	5984	6394	5430	5650	6205	5883	5253	6537	6065	5652	6493	6244	7061	5929	6095	5996	4586	4595	4439	4437	4634	4804	LOC18777234
18781566	2371	2414	2325	7573	6768	11457	6394	7283	7191	7127	4522	4743	4662	4290	4349	4358	4047	4691	4375	4950	4885	6212	6625	6483	5266	5936	5429	6034	5159	5833	5314	5341	4924	7367	8943	7993	5308	7034	7218	7136	7418	6443	5742	5786	4747	7593	7350	6777	LOC18781566
18783787	5370	5905	5948	4966	5339	3775	6547	4308	6013	7587	8831	8218	8982	8149	9375	7033	6479	6936	6121	5544	5668	6404	6574	7644	8386	7067	8086	7579	7166	6217	5744	5814	5956	6961	4810	5470	4735	5106	6745	4595	3949	5202	2217	2746	2933	2233	2357	2299	LOC18783787
18765979	6470	6290	6031	5038	5248	4844	6207	5182	6332	6051	5959	5967	7242	6563	7469	6302	6170	6921	5621	5097	5919	6248	6399	6453	6200	6135	6211	6947	6132	6321	5922	5640	5499	6555	6179	5755	6697	5962	6612	5735	5824	5804	4015	4667	4025	3928	4398	4218	LOC18765979
18787148	5972	5621	5957	6450	6258	9356	5311	5271	6049	5941	4979	5409	4873	4232	4682	4784	4298	5594	6518	6457	7003	5375	5887	5398	4696	4593	4508	5176	4496	5024	5681	5310	4706	5709	6644	5167	5991	5888	5786	6755	7132	6707	6752	6851	6843	7770	7832	7235	LOC18787148
109946244	7904	8488	8272	8924	8882	9416	5276	5410	6076	5986	5501	5819	5207	5593	5550	5052	4155	4137	5812	5281	6918	4930	4675	5434	3812	3950	4225	5860	5052	5342	5241	5094	5097	4491	5195	5109	9315	6598	7827	6279	5676	5358	3593	6724	3548	6023	6327	6032	LOC109946244
18780684	12892	11176	11454	6148	6413	3891	5106	4464	5665	5203	4559	5617	4887	4455	4950	4932	4893	6428	7113	6805	7545	5598	6590	5981	4178	5117	4526	6560	5543	6557	7378	7018	6511	4869	5313	4583	5263	6820	6773	4866	5845	4953	6158	4723	5073	3001	3061	2908	LOC18780684
18787307	5632	4952	5145	5002	5161	4391	4901	4354	5161	5538	5248	6121	5789	4557	5590	5217	5365	6220	5529	5286	6047	5157	5934	5241	5021	5242	5241	5910	5031	5665	6094	6078	5379	6128	6346	5147	6942	7318	7326	7691	7362	7323	6784	7988	7133	6200	6674	6420	LOC18787307
18777611	6090	7576	7212	2792	3142	3306	7334	7868	6799	9440	6918	7156	11334	11077	9779	8838	7919	8632	2976	3017	2294	7633	6489	8368	6238	5999	6169	8838	7760	9018	5299	6027	5846	6066	8104	6499	3388	3925	4612	4487	2229	3566	860	1364	1326	2497	2775	2651	LOC18777611
18784757	5890	5644	5445	4782	4748	4034	6050	5329	6281	6652	5634	6036	6135	5108	5980	5292	5773	6792	3788	3779	4321	4803	5556	5066	4936	5627	4978	6630	5603	5985	6232	6334	5496	6465	6374	5531	7012	6750	7045	6762	6950	6654	6738	7391	7247	5713	6087	5870	LOC18784757
109947555	5294	5000	7129	7051	7060	8638	7546	6383	6806	7484	6309	8598	5871	6483	5648	5906	3787	6390	7993	8119	10068	6254	6592	6532	6381	6029	5081	6209	5385	5593	5588	5936	5799	5658	4303	5482	3898	5226	5401	4849	4567	5031	3101	3165	2728	3663	3553	3394	LOC109947555
18769771	5648	4674	4829	6193	6088	7450	6251	5600	6505	6489	5656	6729	6177	4778	5643	5480	5342	6263	5294	5073	5499	5121	5822	5200	5088	5391	5049	5936	4920	5487	6128	6044	5361	6370	6026	5459	5680	6543	6813	7124	6946	7016	5686	5898	6065	4970	5635	5096	LOC18769771
18789357	4766	6078	5042	3461	3604	3431	7638	5643	5924	5213	3829	4631	10619	11729	10070	7290	7643	8124	3201	3148	4082	6421	6228	8715	4808	5234	6738	12136	10723	9760	5221	6615	6406	4442	4236	5041	8656	9263	10260	2945	3024	2996	2305	2934	2174	1695	1954	1883	LOC18789357
18789916	4724	4411	4272	5131	5280	5731	8036	5263	6823	5807	5967	6389	7771	7395	7739	6550	7130	7789	3943	3480	5178	5208	5948	7026	4972	6456	5666	8270	7050	6361	5944	5882	6090	6308	5720	6766	10045	7431	8144	5858	5268	5327	2787	4879	2424	2070	2504	2222	LOC18789916
18772654	5786	6200	6554	6869	6916	11738	6902	5648	6604	8453	8512	8034	6430	6117	6309	4996	4274	5170	5543	5494	6331	5873	5851	5966	6593	5622	6035	6060	5628	5274	5268	4901	4767	5802	4928	5110	6888	4732	5570	5131	4482	5222	3152	3460	3797	3910	3941	4125	LOC18772654
18772900	5403	5480	5537	5362	5591	4096	5562	4701	5802	5715	5179	5639	6049	5370	6285	5107	4969	5936	5959	5777	6459	5466	6124	5863	5547	5454	5455	6533	5405	6048	6228	5631	5831	5738	6024	5382	6412	6241	6619	6720	6310	6262	5501	5976	5523	6108	6152	6057	LOC18772900
18790236	5179	5240	5013	5899	6329	4971	6061	5120	6191	6238	6015	6255	6468	5587	6655	5790	5597	6120	5997	5759	6087	5821	6160	6310	5736	5963	5996	6559	5792	6010	5968	5961	5566	6356	5945	5365	6130	6243	6576	6025	5814	5729	4520	4813	4763	4269	4598	4489	LOC18790236
18788915	3434	2818	2995	4871	4920	6372	5813	6062	6310	5821	4346	5109	5026	4153	4538	3950	3534	4951	4346	4058	5349	6012	6897	5298	5133	5416	4585	6023	4792	5925	7367	6447	6290	5256	5749	4205	6953	5740	6188	9606	9532	9022	7002	7795	6940	7655	7909	7433	LOC18788915
18779058	7190	7113	7302	5447	5712	7285	5767	4806	5572	6410	6598	6360	6473	5696	6342	5647	5354	6019	6442	5614	5661	6276	6070	6376	6226	5856	6229	6591	6056	6228	5928	5797	5361	6879	6088	5583	4529	5791	6457	5230	5073	5377	3822	3867	4279	3635	3724	3467	LOC18779058
18788978	6239	6317	6624	4636	4986	1799	6490	4570	6289	6429	8347	8177	8231	7517	8485	6677	5985	6745	6106	5260	5154	5896	6091	6594	7772	6939	7211	7136	6743	6190	5814	5923	5935	6480	5153	5506	4932	5015	6455	4712	4165	5103	2917	3125	3258	3117	3036	3266	LOC18788978
18777882	6921	7099	6661	5703	5535	5096	5804	4706	5873	6662	6087	6379	6896	5774	6625	6170	5987	6570	5488	5425	5761	5393	5957	5988	5486	5475	5574	6418	5748	5806	5352	5595	4904	6314	5878	5140	7208	5821	6482	5045	5067	5140	4467	4746	4825	4502	4659	4488	LOC18777882
18788268	4017	4142	4551	1033	1110	962	3170	1995	2963	2354	1276	1663	5275	6659	6049	7189	5881	7573	2129	948	1606	4518	5233	3271	1683	1942	1947	11486	8869	11608	4952	5320	4786	6812	6326	3165	11398	8878	11499	9548	10102	7423	10860	16575	7387	9031	9933	7510	LOC18788268
18772503	4854	4585	4761	8711	7807	9985	6645	6871	7489	7508	6081	7004	4415	3716	4121	3695	3271	4620	6719	7171	8459	5278	5450	4679	3961	3850	3822	4232	3911	4370	5568	5434	4725	4322	4818	3649	5560	5213	5322	6278	6904	6085	6720	7422	6709	6798	7306	7192	LOC18772503
18781777	5572	5332	5136	4270	4224	3901	6194	4942	5843	6233	5326	5127	7076	7291	7576	6896	6545	7139	4949	4474	5015	5972	6206	6849	5471	6037	5722	7697	6858	6965	5600	5564	5066	6173	6324	5789	6256	5806	6239	5247	5156	5159	4836	5022	4949	4483	4766	4434	LOC18781777
18769157	7318	7168	7286	5531	5596	6259	6019	5083	5818	6541	6231	6103	6658	5606	6339	5909	5612	6592	5824	5631	5724	6045	6301	6326	6037	5492	5942	6560	5636	5909	6042	6080	5086	5974	5746	5088	5931	4975	5435	4975	4803	4837	3892	4417	4579	3996	4228	4222	LOC18769157
18770430	2694	3045	3189	4135	5096	2072	7119	4224	6289	5633	6863	7262	8118	7911	9323	8020	6754	7654	6009	5405	6270	6999	7920	8002	9431	8480	8943	7477	7076	5959	6121	5777	6251	6111	4719	4813	4437	5832	5965	5300	5480	5553	3092	2569	2403	1595	1999	1572	LOC18770430
18767440	5682	6262	6021	4384	4840	3956	7302	5698	6378	6477	5905	6281	8473	7815	7862	8282	7467	8672	4616	4360	3931	5986	6117	6436	6469	6147	6587	7804	6841	7164	6072	5631	6092	6062	5256	4835	4666	5298	6278	4812	4660	4556	3219	3644	4020	2088	2254	2009	LOC18767440
18774940	7620	7362	8377	6008	6038	7412	6621	6497	6362	7142	5785	6620	5832	5630	5374	4921	4003	5624	6438	6489	6345	6358	6624	5589	5701	5588	4711	5756	5135	5667	5634	5662	4789	5104	5435	5270	4034	5179	4971	5738	5098	5385	3974	4105	4404	4530	4388	4280	LOC18774940
18784825	1269	1378	1157	6444	6471	5184	5815	5514	5965	9118	8902	8068	9256	7232	9192	9595	8536	9802	5864	6278	7221	4254	4328	4018	4969	4157	4550	4265	3674	4191	5481	5490	4286	3944	3544	2812	5227	4623	4540	6030	5876	6564	4954	5438	6528	6256	6784	6531	LOC18784825
18793519	7538	7215	7501	5962	6135	7336	5662	5422	6178	6130	5003	5659	5400	4550	4847	4873	4366	5292	6238	6005	6818	5803	6102	5358	5330	4981	4849	6266	5305	6010	6032	5737	5218	6051	5863	4921	6236	5797	6031	5799	5661	5663	4744	5248	4914	4520	4512	4486	LOC18793519
18771249	3561	3489	3765	5163	5164	9541	5987	5934	6247	6777	5618	6388	5725	4486	5116	5006	4452	5606	5511	5587	6503	6089	6076	5592	4761	5177	4788	5377	4667	5666	5612	5127	4979	4833	6224	5022	7206	5766	5691	7242	6819	6288	5147	6174	5090	6441	6922	6733	LOC18771249
18766712	5478	5411	5267	7328	7132	8534	5869	5643	6635	6018	4905	5747	4797	4372	5101	4867	4604	5590	5944	5931	6862	5319	5732	4984	4545	4785	4768	5726	4670	5099	5735	5483	5155	5434	5901	4642	6803	6181	6614	6105	5694	5467	5115	6001	5095	5686	6079	5937	LOC18766712
18767345	14507	15857	15526	7040	6562	7370	6227	6219	7455	4591	3057	2949	5141	5115	5560	5615	5161	4965	4333	4114	3702	4009	4871	4801	3555	4194	3605	6317	5501	5487	4030	4173	4262	5654	6104	5979	5243	5260	6193	3975	4055	3276	4243	5314	4746	4884	4898	4520	LOC18767345
18789784	4250	2833	3713	16651	14966	5783	4136	5719	6365	5498	5090	6517	1464	773	1702	1608	1244	2930	10850	13054	14040	4926	5640	3857	2306	2104	1945	1793	1536	2127	3682	3888	2553	3717	4231	2980	3486	5450	4452	7749	8427	8651	8266	7319	6716	11144	10986	10908	LOC18789784
18767245	8088	7829	7325	6133	5950	6056	5709	5720	6380	7045	5683	6244	5420	4388	5011	4815	4699	5760	4624	4606	6415	4290	5093	4290	4599	4595	4207	5480	4468	5026	5489	5729	4839	5900	5025	4552	6404	5305	5462	5840	5861	6429	5624	6691	5990	6000	6392	6250	LOC18767245
18777203	6048	5343	5293	11292	10024	5224	7289	6531	8072	4726	4017	5592	5869	5303	5595	5561	4673	6121	5475	5655	5588	5844	6761	5554	4625	5015	4865	5055	4527	5186	7264	6886	6573	4693	4805	5032	4503	5841	5482	5348	5304	5095	3843	4205	3457	4750	4969	4924	LOC18777203
18789064	18402	14818	17954	3869	4024	5399	4578	2121	3839	3096	3759	2716	6217	8226	7741	5456	5436	6872	3321	2658	3457	8214	8819	9973	5411	6770	5435	7582	6918	8171	6397	5614	5469	4414	4601	5436	4393	5074	5099	4718	3504	4397	1414	1566	1041	1662	1754	1590	LOC18789064
18767387	7665	8041	8433	5703	6011	5250	6252	5566	6176	7344	7262	7234	6499	6300	6297	5215	4489	5740	6015	5590	6210	6308	6433	6412	6589	6244	5937	6158	5616	5894	5603	5283	5063	6208	6026	5779	6041	4646	5434	4421	3969	4621	2691	2670	2771	2998	3149	2948	LOC18767387
18779773	4743	4318	4498	5140	5466	2514	5258	4587	5699	5563	5554	5883	5688	4740	5803	5024	4764	5402	5469	5400	5296	5140	5541	5309	5210	5102	5215	5549	5062	5263	5705	5670	5374	5735	5735	5030	3885	6137	6742	7495	7209	7229	6242	7706	6896	7051	7556	7499	LOC18779773
18766010	6585	6396	6289	6520	6293	9375	6027	5449	6080	7307	6368	6589	6299	5262	5873	4984	4709	5677	5409	5318	6173	5313	5459	4808	5262	4707	4776	4796	4172	4846	5442	5228	4855	5018	5423	4466	6405	5312	5774	6250	6012	6209	4785	4997	5118	4766	5069	4769	LOC18766010
18784784	5988	7049	6995	6485	6213	6463	5214	5289	5443	6955	5485	5725	4284	3624	3945	4301	3681	4665	6313	6412	7607	4844	4946	4291	4257	3785	3976	4704	3960	4784	5016	4940	4669	4846	5359	3976	5178	5287	5279	7307	7053	6695	6985	7257	7466	7722	8062	7916	LOC18784784
18768544	4796	4623	4755	9431	8996	13648	6012	6800	6927	6500	4756	5597	3326	2632	3023	2988	2469	3219	6341	7127	8537	5289	5297	4242	3619	3576	3662	3727	3260	3939	5289	5241	4640	4219	5039	3891	5743	5667	5234	7294	7465	6841	6293	6996	6175	7865	7704	7618	LOC18768544
18781215	6003	6378	5937	4595	4701	4824	5899	4262	5333	7041	7478	7292	7976	7650	8757	7067	6838	7509	5132	4614	4884	5185	5444	6039	6337	5909	5963	6606	5780	5685	4937	5073	4969	6099	5185	5138	5988	5325	6342	5051	4533	5208	3197	3660	3892	3500	3585	3455	LOC18781215
18793743	5278	5674	6015	6389	6544	9550	6925	5702	6547	8342	7890	8716	6623	6103	6710	5202	4449	5339	5697	5622	6275	5653	5794	5580	5895	5317	5411	5416	5049	5084	5404	5136	4874	5218	4665	4510	4717	4689	5328	5512	4692	5419	3360	3734	3883	4005	4223	3971	LOC18793743
18792043	6519	6505	6867	7838	7085	12383	5330	5519	5931	7697	6391	7164	4628	3456	4389	3359	2926	4121	7160	7102	8328	5766	5855	4663	4746	4404	4496	4486	3856	4188	5672	5641	4822	4205	4463	3492	5243	4700	5287	6483	6410	6593	5157	5741	5692	5287	4906	5125	LOC18792043
18793358	9047	10400	9815	3661	4078	2253	5531	3395	4893	6403	7780	7630	7662	8250	8471	8049	6833	7500	5501	4223	4423	5674	6162	6765	6140	6225	6194	6462	6077	5722	4911	5199	4925	6412	5429	5329	4849	5342	6819	4393	4317	3881	2568	2614	3224	2066	2496	2064	LOC18793358
18790707	14496	15557	16018	4456	4456	1521	4741	4722	5112	6189	5389	6214	6221	5517	6276	5887	5498	6747	5395	5105	5471	5026	5284	4650	4462	4100	4149	4937	4516	5321	5722	5296	4435	4773	5065	4078	4177	4119	4364	4876	4518	4665	4319	4300	4740	4810	5052	5002	LOC18790707
novel.48	598	447	802	1407	1577	299	1360	2659	3039	279	288	442	1799	1396	1245	1973	2013	5130	2137	2256	2075	5367	6652	4885	2597	3806	2830	5075	5487	8621	11133	9428	7696	7484	9504	9986	5253	11633	7568	10279	11414	10973	11662	6337	11538	16243	14865	15102	-
18789873	7437	7302	7423	5390	5208	4262	5934	5454	6026	5880	5093	5411	5611	5028	5500	5137	5073	6209	4001	3856	4744	4588	5066	5002	4442	5046	4408	5808	5271	5308	5496	5478	4917	5630	5391	5150	6715	6022	6171	5868	5713	5663	5630	6413	6089	6501	6490	6134	LOC18789873
18772704	522	720	715	7198	6236	16109	5936	6545	5747	9257	7195	5913	4451	2777	3166	4077	3457	7575	3945	4315	4806	8441	11631	7651	4487	6947	4866	5534	4472	6490	8285	7218	5305	5024	6551	4164	6455	5554	5036	6417	7093	6728	7112	2650	2652	2962	3034	2966	LOC18772704
18770231	5077	5075	4912	6141	6311	9040	5831	5955	6320	6493	5077	5516	5317	4620	4956	5017	4878	5863	5024	5053	5646	5538	5727	5427	4757	4815	4857	6017	5217	5999	6428	6029	5320	5361	5991	4981	5848	5871	5843	6487	6743	5893	4939	5103	4879	4622	4847	4571	LOC18770231
18770914	6619	7371	7244	4436	4980	2912	5987	4115	5800	7012	7579	7470	8383	7690	8305	6896	6316	7069	4915	4593	4963	5550	5780	6219	6194	5709	6203	6126	5803	5855	5248	5256	5101	5751	4791	4782	5702	4903	5850	4601	4113	4902	2948	3119	3506	3860	3841	3733	LOC18770914
18770979	4362	4271	4073	6984	6930	5327	6199	6200	6987	6739	5686	6064	6819	6133	6911	6293	5817	6352	5624	5251	6424	5487	5899	5977	5289	5403	5226	6108	5536	5722	5421	5295	5258	5599	6005	5422	6405	5254	5437	5051	4659	4600	3315	4355	3167	4716	4648	4322	LOC18770979
18777779	30158	23818	24029	9468	9344	11690	6223	6412	6683	8172	7118	8545	4350	4022	3769	3516	3361	5611	4682	4723	5572	3382	3880	3221	2275	2771	2434	2984	2707	3295	4264	3756	3317	2207	2253	1678	3157	3575	3339	2632	2995	2426	2913	2070	1948	1331	1503	1335	LOC18777779
109950645	6232	6351	6459	5355	5323	7667	6366	5503	6153	6599	6570	6791	6899	6377	7138	5779	5199	6388	5794	5062	6106	6206	6308	6609	6332	6231	5924	6516	6020	5956	5640	5254	5208	5883	5658	5459	6830	5021	5475	4251	4055	4150	2645	2734	2675	2411	2694	2589	LOC109950645
18779560	5070	4654	5177	8390	7900	4979	6653	7163	7744	7900	6085	7998	4781	3961	4403	4289	3230	5098	6090	7125	8325	5280	5758	4406	3802	3612	3294	4141	3662	4306	5853	5641	5021	3913	3728	3076	4611	4550	4555	6187	5938	6242	5901	5829	5845	7976	6985	7573	LOC18779560
109949294	359	483	443	5547	4743	3385	7154	7470	7453	7879	5728	6994	6170	4581	4939	5620	4880	7288	4564	5839	6251	5838	7063	5578	6223	6478	5760	5671	5053	5669	6158	6168	5593	5345	5287	5676	7003	6238	6055	6674	5946	6626	5065	5067	4527	5289	5270	5296	LOC109949294
18779285	15516	17395	17524	4705	4526	4480	5650	5094	5750	6474	4995	5736	5387	4760	4752	5337	5010	6029	5112	4738	4562	4466	4693	4243	3805	4003	3571	4547	4094	4696	3972	3893	3651	5131	5954	4824	3822	4191	4293	4806	4535	4440	3831	3872	4781	5390	5518	5163	LOC18779285
18769206	4875	4839	4758	7357	6968	13598	6129	5879	6501	7557	6315	7556	4914	3523	4428	4176	3940	5182	5119	5287	6221	4449	5194	4048	3986	4057	3896	4330	3773	4318	5422	5018	4694	4687	4529	3430	4482	5063	5237	5887	6248	6086	6231	6723	6467	6465	7195	6444	LOC18769206
18777768	73	48	58	2841	3768	1083	6224	3324	5266	3593	4044	3322	7852	10613	12499	6697	6696	5077	3466	3019	2923	8284	9444	13805	10017	11194	13182	12829	10481	8981	5484	4908	6020	7374	5890	6234	4715	4787	5625	4002	3971	6398	1749	1596	1417	731	848	596	LOC18777768
18784979	5316	5309	5245	5631	5485	6397	4755	4682	4536	5431	4636	5374	5113	3880	4155	4329	4502	5598	5526	5242	6393	5276	5161	4660	3592	4351	4003	5180	4275	4790	6447	6102	5817	3584	4220	3524	7505	6646	6192	7497	7758	6178	7332	8650	6750	6275	7105	6232	LOC18784979
18778210	6899	7408	7111	5225	5761	5068	5793	4057	5567	6974	7343	7190	7222	6629	7786	5872	5369	5667	5562	5182	6290	5471	5757	5854	6806	5637	6353	6118	5705	5245	5235	5503	5498	5525	4835	4497	6639	4540	5684	4413	4047	4931	2920	2981	3113	3026	3271	2956	LOC18778210
18773023	6441	6239	6031	4378	4767	3729	5491	4858	5764	6095	5477	5975	6155	5421	5836	5838	5712	6823	4536	4557	4779	4983	5607	5243	5050	5336	5244	6226	5176	5774	5887	5655	5284	5900	5978	5184	5200	6185	6571	5948	5870	5552	4971	5376	5212	4516	4898	4741	LOC18773023
18793421	6630	6251	6681	5703	5981	4071	5976	5292	6214	6312	5899	6364	6339	5709	6175	5687	5128	6095	5425	5481	4306	5132	5511	5173	5277	5176	5142	5511	5044	5567	5524	5563	5196	5483	5243	4784	3298	5551	5800	5866	5414	5664	4693	4869	5163	4723	5326	5007	LOC18793421
18788788	2706	2210	2543	3553	3530	1885	5387	4720	6037	4895	4335	4815	5063	4184	4869	5075	4413	6438	4686	4636	4824	5978	6988	5313	4162	4717	4246	4684	4177	4844	6230	5955	4783	5450	5962	4936	6053	5930	5743	7466	7419	6804	7902	10743	7698	8321	9376	9638	LOC18788788
18786921	8153	7906	7547	5122	5337	5105	6006	4431	5753	6282	6071	6618	6895	5903	6730	6033	5670	6762	4987	4761	5604	5267	5885	5462	5145	5362	5262	5695	5073	5262	5512	5052	5049	5896	5554	4731	5661	5549	6054	4861	4990	4828	3929	3741	4030	3456	3544	3509	LOC18786921
18774959	9897	9558	8793	5637	5657	3385	5143	4049	5212	5846	5260	5349	6507	6028	6806	5652	5359	5964	5159	5248	5651	4917	5088	5342	5280	4878	5224	5778	5083	5538	4976	4973	4859	5964	5147	4739	6360	5182	6227	4732	4451	4705	4179	4216	4360	4571	4478	4560	LOC18774959
18776446	5422	4779	4948	4010	4514	4229	4690	4101	5023	5215	4951	5581	5868	4823	5575	5304	5106	6157	5254	5073	5984	4865	5800	4960	4771	5036	4777	5960	5016	5363	5585	5593	5140	5743	5935	4680	7520	5967	6443	6245	6214	5926	5755	6477	6318	6138	6544	6361	LOC18776446
18791521	4288	4133	4265	4902	5032	4162	5471	4907	5571	5793	5751	6088	5242	4494	5259	4907	4285	5406	5539	5161	6348	5462	5695	5492	5087	5045	4927	5427	4594	4946	5448	5576	4573	5797	5898	5540	6691	6215	6162	6503	6707	6543	6300	5688	6183	6029	6048	6025	LOC18791521
18769649	5396	4899	5048	5608	5399	5254	5813	5338	6049	6701	5942	6752	5957	5235	6009	5673	5176	5997	4778	4463	6070	4759	5441	5106	4959	5561	4894	6022	5332	5714	5284	5214	4988	5583	5437	5052	7218	5883	6069	6007	6008	5990	4636	5214	4971	4140	4272	4223	LOC18769649
18777415	3427	3639	4012	6709	6145	11466	4726	5482	5411	5246	4009	4621	3461	2759	2946	3200	2889	3774	5929	6376	6591	4434	4371	3957	3368	3691	3314	3734	3280	4001	4903	5285	4043	4660	5499	4855	4884	6397	5828	7598	7869	7031	8995	9707	8792	9221	9317	9523	LOC18777415
18772625	4986	4755	5394	2320	2125	2532	4993	4218	4944	1987	890	904	2026	1745	1332	2232	1532	3112	1021	1528	1341	5239	6044	3231	2290	2375	2144	2888	2527	3287	6524	5818	4713	5407	5503	3366	4407	3765	3983	8490	9711	7921	23052	23111	18042	13407	13559	14457	LOC18772625
109947795	11683	11348	11932	6263	6083	8816	6367	6311	6506	6802	5877	6180	5886	5425	5764	4971	4091	5462	5174	5232	6055	5340	5638	5379	4793	4603	4164	5088	4731	5166	4964	4900	4434	4711	4992	4603	5508	4278	4274	3897	4058	3880	3123	3117	3018	3352	3463	3428	LOC109947795
18767775	12095	13391	15323	2947	3493	2685	4986	5005	5803	4382	3837	3850	4108	4123	3558	4530	2713	2976	4285	2959	3310	3895	3720	3802	4115	3799	3793	4346	4034	3815	2355	2273	2736	7098	7468	6162	4168	3450	3979	6056	3512	5367	2012	2832	3288	18251	16936	17280	LOC18767775
18767530	10364	10072	10057	4693	4971	5090	5627	4188	5357	6308	6467	6414	6386	6066	6405	5306	4900	5853	5042	4405	5078	5424	5689	5844	6422	5874	5962	6222	5751	5993	5710	5700	5291	6297	5309	5135	4257	4592	5258	4020	3690	4554	3035	2873	3631	2777	3105	2916	LOC18767530
18789734	4630	3855	4294	8653	9011	6147	5518	4973	5725	8381	8926	9542	6012	5106	6851	4647	4593	5143	11912	10426	14571	5215	5441	5582	4894	4973	5748	5091	4441	4458	4476	4330	4143	5224	4721	4114	4364	4286	4505	3629	3615	3865	2225	2347	2309	2467	2447	2551	LOC18789734
18782879	4365	4368	3579	10762	10012	20894	7343	7996	8143	7874	5527	6208	4914	4097	4869	4794	4636	5141	4786	4731	5895	5077	5551	4726	3824	4606	4063	5451	4611	5094	6039	5494	5218	4573	4610	3924	6153	5038	4790	4182	3854	3915	2714	3690	2651	3147	3155	2835	LOC18782879
18776689	10377	9044	10235	11967	11196	10098	6175	7082	6499	7132	5899	6954	4401	3739	3779	3235	2666	4455	9765	10256	13442	6105	6172	4507	3334	3174	3032	3654	3150	4454	5993	4676	4876	4348	4611	3116	4432	4125	3734	3622	3421	3570	2104	2076	1813	2259	2352	2335	LOC18776689
18779502	5465	5285	5652	4605	5127	3979	5138	4611	5118	4772	4410	4837	4825	4218	4732	4516	4389	5095	5465	4943	5710	5155	5366	5241	4461	4776	4818	5352	5069	5225	5325	5429	4729	5149	5654	4849	5915	6059	6230	6816	6945	6723	6357	7108	6648	6720	7097	6738	LOC18779502
18792177	9321	7252	8046	20276	19504	12982	5907	8353	10338	4120	4995	5345	4251	4154	5710	4726	3854	4593	10449	11217	11752	4599	4346	6053	3107	3652	3430	2792	2384	2303	2472	3644	2549	2447	3466	5822	3460	4493	4360	2941	2213	2109	770	1465	968	1916	2002	1924	LOC18792177
18782131	5927	5603	5541	5303	5281	4898	5432	4923	5779	6001	4865	5675	5183	4461	5116	4880	4547	5778	4627	4578	5260	4525	5212	4782	4213	4738	4510	5461	4689	5053	5466	5351	4692	5739	5576	4928	5246	6294	6291	6447	6471	6313	6547	6709	6389	5656	6040	5821	LOC18782131
18778737	9969	9554	8869	5442	5470	5679	5664	4864	5708	5321	5129	5363	6212	5621	6078	5397	5168	6369	4881	4963	5247	5316	5533	5404	5256	4916	5076	5622	4941	5471	5242	4951	4437	5628	4943	4560	4805	4625	5441	4866	4633	4714	4009	4206	3911	4196	4520	4427	LOC18778737
18788532	910	888	862	5931	5703	7035	4508	5056	5833	4502	3933	4213	2741	2097	2913	2816	2696	3837	5285	5468	7257	4578	4710	3687	3510	3568	3485	3809	3152	3901	4650	4706	3719	5444	6675	4803	7376	6065	5960	8834	9648	8361	9601	11217	9103	10580	11118	11157	LOC18788532
18776639	4262	4286	4204	6401	6159	6809	5526	5471	5813	6595	5490	5876	5983	5490	6234	5665	5444	5798	5521	5374	6438	5430	5780	5595	5103	4951	4877	5813	5171	5570	5396	5498	5205	5563	5757	5158	6818	5613	5820	5356	5158	5102	3752	4638	3900	4120	4010	3863	LOC18776639
18789508	2992	2940	2618	9667	8051	5011	5345	5348	6539	5193	3690	3841	2937	3007	3573	3445	2749	3640	6203	6922	8107	4671	4749	3927	3303	3430	3332	4052	3313	4229	4483	4242	3774	4516	4970	3892	6562	5658	5487	6925	7572	6144	9863	11023	8211	8356	9296	9107	LOC18789508
18790195	4913	4220	4399	6410	5940	8013	5373	5234	6184	4702	4132	4829	3899	3142	3549	4133	3692	5225	4984	5034	4799	4502	4758	3738	3709	3711	3578	4008	3223	3931	5476	5460	4108	4196	4225	3378	3899	6066	5737	8057	8118	7394	9309	9636	9078	7589	8649	8545	LOC18790195
18772818	1634	3289	2163	2403	2654	1177	5958	3488	4078	3610	4079	3952	9496	12283	11260	8849	7280	7407	3603	2596	3400	5910	5665	7747	4684	5765	5727	10008	9326	8538	4721	6513	6228	3959	3921	4844	7723	8323	10128	4390	5048	3288	3526	5914	3079	2192	2777	2225	LOC18772818
18784909	5387	5383	4471	5898	5945	8214	6124	6209	6642	6794	5565	5757	5197	4792	5179	5221	4363	5323	4983	4765	5555	5649	6064	5475	4680	5210	5036	5905	5035	5781	5200	5041	4620	5080	5774	4660	5996	5493	5843	5921	5565	5073	4363	5288	4154	3835	4315	3948	LOC18784909
18787086	1478	1251	1360	6883	7430	9575	5257	5135	5539	4496	4154	4514	4109	3801	4344	4416	4325	5155	7780	7355	9657	5741	5587	5908	4362	4945	4498	5843	4967	5020	5857	5603	5290	4308	5027	4377	7547	6771	7015	7007	6928	6112	4946	7047	4498	4579	4543	4069	LOC18787086
18776707	2790	1815	2287	9708	8652	8438	3630	4454	4729	4385	3894	4334	2511	1867	2690	2874	2746	3338	8060	8079	10299	4583	4558	3602	3016	2814	2824	3607	2936	3678	4424	4491	3623	4881	5335	4388	6298	5233	5266	8449	7455	7220	7270	10002	7646	10359	10564	10161	LOC18776707
18770709	2596	2719	2536	4732	5031	5205	6269	5157	6263	6962	6203	7018	6689	6110	7058	6627	6267	7148	5139	4449	5500	5324	6655	5866	5350	6320	5917	6823	5772	6270	5912	5714	5424	5615	5301	4605	5657	5473	6215	5141	5447	4913	4226	4595	3752	2622	2925	2519	LOC18770709
18791516	18348	24019	24108	5222	7029	3426	3744	2123	3503	3563	3654	3297	3492	3387	4555	3941	3749	3004	6217	3864	3427	2133	2387	2537	2653	2658	2638	6441	5505	6646	2552	2859	2839	2766	3165	3003	3852	4536	6121	4151	4180	2885	8133	7940	7881	5471	6405	5538	LOC18791516
18772937	6957	6994	7012	4548	4892	2354	5063	3959	5130	5781	5848	5683	6679	6428	7084	6416	6347	6541	5440	4678	5292	5777	6059	6144	5735	5403	5757	6590	5888	5741	4852	4768	4374	7042	6236	5465	5784	5189	6299	4410	4183	4258	3154	3203	3923	3426	3273	3119	LOC18772937
18786829	60	47	91	4799	5462	2414	7444	4010	5772	4807	6190	6338	8692	9062	10526	7315	6658	7395	5913	5115	5395	7571	7050	10840	7683	8718	9147	8699	7259	6469	6384	6367	6292	6663	4894	6579	3992	6529	7851	3274	2745	3126	653	1090	499	506	428	318	LOC18786829
18775199	3820	3724	3470	6390	6140	8681	5043	5063	5960	5557	4385	4868	4342	3596	4382	4277	4242	5283	5466	5519	6135	4491	4723	4231	3765	4200	3860	4482	3889	4786	4925	4810	4277	5092	5673	4514	5506	5813	5868	6631	7400	6594	7274	7681	7285	6655	7175	7094	LOC18775199
18790089	5634	6014	5879	4955	5077	5817	5793	4362	5394	6743	7150	7633	6856	6097	6618	5466	4934	6091	5823	5286	5267	5274	5359	5664	5893	5313	5521	5560	5182	4947	5146	5253	4960	5269	4397	4270	4325	4503	5227	4962	4793	5407	3886	4077	4157	4158	4072	4013	LOC18790089
18788692	9992	10837	11734	5598	5444	4678	6528	6196	6449	6761	5890	6319	6410	6231	5876	6111	4612	6737	6049	5001	6158	4995	5594	5318	4848	4953	3907	4591	4350	4484	3960	3977	3729	5331	5383	5898	4985	4321	4262	4110	3883	3721	2626	2953	2945	3380	3332	2899	LOC18788692
18773001	6225	6374	6239	4610	4950	2753	5043	4282	4914	6033	5322	5760	6223	5257	5829	5023	5104	5894	4949	4515	5337	5115	5556	5049	4958	4948	4748	5549	4926	5566	5715	5709	4939	5760	5539	4792	6537	5670	5865	5713	5767	5592	4870	5335	5214	4633	4786	4856	LOC18773001
18792375	5939	5810	5623	5104	5294	6174	5457	4725	5631	6209	5521	5529	6303	6548	7041	6039	5698	5730	5540	4837	5246	5448	5435	6038	5350	5095	5478	6975	6008	6241	5310	5299	5074	5368	5546	5009	4637	5357	6123	4876	4741	4368	3646	4178	3461	3013	3114	2896	LOC18792375
18769128	6083	5421	5437	4869	4767	3675	4699	3850	4714	5250	4839	5838	5545	4165	5301	5085	4924	6215	5178	4943	6233	4943	5607	4954	4317	4647	4479	5534	4543	5353	5357	5209	4784	5860	5764	4911	6175	6093	6351	6294	6111	5800	5698	6316	6054	4682	5229	5402	LOC18769128
18792718	5238	4734	4668	3971	3814	6939	4152	3575	4323	5159	4410	5523	5048	3890	4608	4766	5051	5811	4471	4480	5300	4443	5185	4489	3814	4091	3647	5310	4215	4948	5215	5074	4317	5493	5364	4280	6489	6563	6683	7498	7729	6791	7959	8129	8595	5167	5348	5575	LOC18792718
18784163	6741	6390	6569	6038	5838	8551	5272	5478	5968	4947	4180	4678	4904	4191	4682	4646	4038	5163	4617	4848	5379	4283	4537	3919	3598	3520	3256	4059	3475	4356	4599	4477	3999	3953	4644	3838	5405	4507	4307	6207	6031	5796	6167	7363	6962	8112	8997	8576	LOC18784163
18782040	5770	5463	5515	5101	5319	7068	5776	5214	6314	6145	5471	5781	5776	5095	5599	5699	5220	6129	4717	4750	5350	4959	5357	5306	4976	5093	5199	5593	4897	5136	5441	5296	5095	5106	5502	4851	5794	5341	5411	4999	5126	4986	3873	4044	3852	3787	3911	3781	LOC18782040
18781735	6078	5986	5737	5193	5307	4513	5406	4880	5412	6341	4945	5859	5317	4491	4950	4807	4809	5823	4600	4833	5175	4456	5054	4633	4365	4622	4273	5618	4633	5581	5561	5430	4830	5311	5356	4284	5569	5612	6059	5637	5947	5506	5552	5641	5602	4614	4744	4847	LOC18781735
18790186	3716	3697	3824	3564	4021	2751	5867	4657	5685	5801	5874	5967	5030	4774	5706	4822	4944	4525	4470	3768	4445	4320	4665	4660	4761	4532	4566	5494	4555	4949	4229	4626	3984	5210	6614	6016	6115	6177	6210	6376	5867	5606	5852	7952	6010	7347	7478	7367	LOC18790186
18791312	4730	4478	4447	6255	6170	5480	5339	5222	5790	5573	4724	5243	4565	3690	4408	4033	3805	4661	5741	5703	6611	4871	5181	4326	4167	4323	4143	5089	4133	4922	5309	5294	4690	4994	5366	4213	5888	5863	6035	6465	6351	5977	5779	6304	5645	5680	5921	5761	LOC18791312
18771868	3116	3316	3052	9666	8966	14645	5063	6338	6536	5564	4055	4520	2612	1953	2537	2213	1947	2813	6231	6794	8161	4481	4881	3898	2997	3096	2907	3320	2783	3442	4566	4386	3443	3848	4741	3148	5897	5436	5102	7287	8332	7410	7815	7814	7452	7064	6865	6806	LOC18771868
18775967	3305	3461	3380	4877	5051	6365	5224	5231	5431	5946	5227	5364	5755	5847	6528	5486	4944	4855	4933	4525	5599	5377	6043	6238	5344	5741	5607	6507	5582	5989	5018	4721	4843	5329	6087	5303	6640	5685	6224	5184	4726	4833	3757	4884	3931	4020	3896	3816	LOC18775967
18773586	16035	20540	19903	5838	5336	7478	4771	4496	4957	5944	4946	6746	4063	3253	3632	3643	3284	4248	4244	4327	4723	3587	3871	3530	3237	3359	3095	3374	3126	3229	3842	3770	3592	3460	4271	3668	5017	4093	3863	4300	3814	3807	3465	4258	3804	5388	5608	5599	LOC18773586
18776778	7126	6960	8152	4552	4969	2617	6127	4619	5675	6644	6337	6868	6501	6791	6724	5237	4756	6197	5214	4892	5414	5002	5588	5637	5801	5500	5044	5941	5196	5601	5062	5097	4825	5461	4386	4683	4498	5003	5591	4530	3850	4632	2754	3176	3142	3575	3236	3221	LOC18776778
18789484	4191	4233	4853	5699	5765	4721	6372	5866	6042	7224	6699	7088	5826	5133	5516	5091	4054	5185	5217	5190	5577	5392	5701	5208	5201	5185	4678	5242	4886	4983	5277	5306	5029	4397	4615	4579	4099	5079	5452	6162	6137	5976	3777	4469	3695	4231	4064	3826	LOC18789484
18766586	7332	7668	7737	6110	5987	8383	5378	4999	5822	5734	4654	5142	4922	4492	4804	4708	4180	4834	5310	5249	5915	5082	5190	5079	4394	4356	4366	5065	4465	4850	5040	4862	4442	5119	5480	4530	5167	4676	5136	4912	4921	4742	4071	4717	4148	4669	4742	4499	LOC18766586
18790012	7919	7955	7473	4243	4397	8004	4498	4180	4310	5713	4562	5249	4743	3517	3689	3847	3709	4618	5512	5560	6347	4027	4253	3488	3677	3665	3505	4624	4067	5078	4603	4602	3833	4833	4986	3397	6549	5363	5537	6040	5839	5456	6901	7665	6691	6436	6346	6418	LOC18790012
18783360	3758	4101	4001	3531	3835	3834	5113	3947	4836	4610	4277	4439	6126	5215	5857	5720	5278	6784	4792	4731	5198	6711	6661	6337	4895	5401	5256	5196	4481	4627	4954	4526	4233	5361	5532	4872	6766	5773	6379	6307	6055	6139	4857	4068	4588	5823	6159	5956	LOC18783360
18767711	4906	5291	5321	4202	4260	2311	5118	3968	4751	5277	5049	5200	6006	5667	6126	5394	5230	5626	4787	4348	5645	5023	6016	6127	6043	6020	5880	6842	6091	5931	5542	5589	5594	5942	5671	5788	7331	5581	6180	4803	4663	5075	3569	3884	3818	3474	3550	3312	LOC18767711
18769963	6888	5238	5846	9182	8808	4759	5814	6526	7606	5476	5094	5891	2835	2303	2967	2755	2417	3765	9162	9243	9942	4340	4810	3459	3463	3417	3287	3001	2762	3482	4488	4476	3549	3930	4705	3337	3214	5295	4512	5799	5497	5970	6004	5490	5850	6546	7520	7018	LOC18769963
18777866	4738	4642	5321	5017	5391	3255	5768	4885	5223	6159	6270	6434	5954	5624	6270	5031	4302	5330	5523	5253	5357	5611	5383	5451	5552	5163	5464	5504	5101	4949	5295	5346	4938	4916	4520	4457	4160	4690	5099	5246	4773	5196	4103	4513	3979	5537	5544	5398	LOC18777866
18774912	3682	3738	3529	3997	3991	2923	4961	4105	5037	5496	5364	5608	6647	5284	6366	6191	5840	6440	4605	4036	4295	4977	5541	5248	5471	5213	5212	5828	4973	5662	5409	5036	4635	6503	7198	5745	5002	5460	5640	5892	5415	5360	4175	4878	4409	5397	5826	5378	LOC18774912
18776617	12164	12188	11332	5223	5683	4915	5152	3693	4739	5178	5428	4895	5570	6274	6362	5285	5193	4787	4531	3917	4637	4833	5012	6659	4485	4975	4876	6432	5776	5406	3937	4607	4118	4842	5647	6462	5415	5629	6425	4258	3998	3556	1850	3138	1768	2068	2227	1937	LOC18776617
18793879	6059	6412	6100	7627	6816	10516	5866	6148	6538	6663	5399	5898	4910	4294	4825	4656	4059	4802	5366	5758	5824	4775	4781	4424	4068	4047	3782	4684	3868	4529	4253	4030	3882	4270	4658	3853	4577	4426	4456	5023	4618	4652	4367	4790	4588	5761	5725	5576	LOC18793879
18788884	1878	3934	2484	1709	1864	1158	8427	5052	5246	3266	2493	2784	12880	15930	13598	8801	8272	8135	2100	1852	2287	7092	6065	11536	6112	5285	7980	12363	11669	8952	4266	5205	5431	4879	1992	2955	5472	7307	11559	1317	1361	1778	364	962	141	131	142	140	LOC18788884
18792669	12887	12758	12809	4780	5007	2512	5094	3809	5006	4583	6064	6087	6068	5739	5962	5650	4745	6030	6886	6146	7675	5845	6059	5748	5463	5206	5472	5686	5545	5016	5672	5864	5484	3633	3608	3386	5002	4370	4205	3036	3310	3325	1654	1865	1385	1342	1559	1453	LOC18792669
18784255	5337	5072	5027	6215	6170	4705	5384	5049	5999	5445	4395	5392	3854	3389	3789	3511	3690	4533	4222	4463	5796	3771	4505	3776	3703	3639	3479	3954	3403	3710	4311	4357	3644	5034	4520	4251	6825	5300	5730	6249	6148	6489	7588	8103	7083	8671	8540	8184	LOC18784255
18786843	6873	6580	6896	4888	5027	3451	5260	4597	5592	5165	4284	5298	5305	4490	5108	5058	4801	5848	4955	5112	6143	4679	5371	4379	4231	4310	3935	4924	4323	4908	4936	4908	4359	5095	5190	4522	6514	5508	5628	5414	5306	5495	4990	5305	5129	5387	5380	5358	LOC18786843
18792975	5640	5556	6097	5008	4851	6349	5501	4943	5817	5892	5433	5551	5141	4885	5653	4701	4239	5249	4977	4814	5676	5206	5142	5299	4663	4426	4555	4831	4545	4734	4784	4660	4274	4959	4943	4280	5363	5115	5138	6034	5339	5270	4374	5256	4499	5382	5418	5594	LOC18792975
18766871	8842	8835	8374	7361	6667	5365	4431	4462	4866	5151	4325	5405	4625	3723	4299	4352	4324	5072	4672	4834	5531	3972	4466	4114	3783	3877	4002	4508	3843	4083	4806	4715	4230	4316	4927	4057	6485	5462	5516	5221	5393	4947	5248	5782	5208	5581	5836	5605	LOC18766871
18785821	4098	3539	3644	5216	5284	6268	5105	4860	5530	5508	4764	5051	5123	4443	4959	4586	4646	5283	4558	4542	6028	4283	4731	4335	3939	4463	4138	5100	4684	5061	5100	4900	4421	4901	5267	4266	6612	5503	5622	6048	6086	5809	5798	6754	5832	5998	6370	6180	LOC18785821
18777242	1585	1382	1402	3022	3087	2368	4878	3805	4854	3492	3292	3015	5570	5095	5922	5156	5093	5450	3416	3125	3687	5341	6274	6424	5163	5889	5423	6491	5699	5383	5977	5761	5958	5249	6327	6191	9244	7501	8040	5972	6700	6041	5806	6689	5373	5734	6010	5879	LOC18777242
18769697	17048	14802	15431	7577	7809	9092	4200	4084	4745	5951	5568	7031	4155	3080	3563	2989	2691	3288	7910	8120	9806	2786	2820	2503	2819	2589	2584	2735	2268	2686	3090	3138	2722	3448	3889	3478	5786	4740	4555	4993	4228	4366	3196	3006	4406	4393	4601	4368	LOC18769697
18771352	4206	4085	3678	7035	6959	5102	6112	6428	6724	6237	4282	5442	4666	4036	4134	4393	4182	5503	5028	5699	6105	4985	6022	4889	3723	4526	3977	5076	4196	4913	5438	5071	4507	5150	5562	4605	5814	6133	5995	5635	5998	5083	5238	4983	4878	4190	4056	4164	LOC18771352
18772383	5739	6148	6307	4622	5126	2904	5791	4422	5193	6839	6911	7404	7074	6913	6683	5308	4611	5840	5445	5017	5810	5423	5288	6223	6243	5764	5525	5492	5645	4926	4518	4660	4927	5499	4028	5084	6013	4351	5500	3896	3615	4464	2476	3066	2671	3248	3155	2979	LOC18772383
18793522	6578	6644	7394	4624	5005	3402	6100	3912	5309	5580	6236	6674	6746	6947	7346	6190	5324	6360	5988	5337	5533	6119	6695	7819	7108	6562	6675	6557	6508	5392	5445	5742	5666	4931	3898	4567	3183	4866	5793	3131	3089	3076	1650	1839	1315	1034	1151	1039	LOC18793522
18789607	6401	5890	6213	5578	5798	4331	5216	5070	5620	5828	4923	5575	5071	4243	4773	4674	4285	5255	4759	4837	5941	4285	4785	4100	4235	4224	4077	4817	4163	4366	4978	5118	4471	5010	4603	4192	5218	5300	5241	5567	5646	5819	5637	5815	5638	5576	5442	5450	LOC18789607
18791811	7753	7228	7497	4756	4741	5450	4998	4757	5506	5628	4687	5317	5465	5027	5389	4985	4599	5617	4336	4531	5156	4566	4907	4534	4409	4185	4374	4808	4148	4684	4862	4590	4264	4766	4694	3992	5549	4887	5131	5147	5181	5204	4826	4953	5027	5430	5395	5372	LOC18791811
18784863	6880	7232	6784	5269	5274	3873	5565	4854	5741	6609	6067	6395	6037	5498	5938	5129	4799	5869	5140	5007	5626	4833	5111	5087	5358	4996	5139	5459	4818	5192	4993	4835	4580	5541	5177	4581	5762	4821	5147	4619	4338	4350	3055	3208	3228	2865	3025	3136	LOC18784863
18789546	4852	5213	5820	4270	4532	3695	5347	4081	5131	6120	6667	6158	6773	6534	7107	5866	4592	5798	4836	4803	5227	5051	5481	5857	6221	5688	5507	5540	5437	5189	4980	4906	4948	5414	4599	4862	4940	4579	5365	4684	4002	5060	2907	3330	3370	3874	3676	3760	LOC18789546
18770812	785	555	774	5512	5437	2138	4045	3945	5484	3665	3269	3364	4175	4065	5262	3967	3491	4560	5567	5327	6460	5879	6896	7151	4608	5768	4993	5152	4385	5008	4661	4587	5136	4066	5105	4986	7337	6305	7069	6327	7145	5784	7887	7741	5173	7000	7533	7054	LOC18770812
18781851	5891	6564	6619	4639	4911	3821	5127	4134	5206	5386	5212	5061	5987	5588	6496	5716	5239	6122	4731	4291	5062	5075	5515	5860	5406	5160	5307	6158	5235	5263	5032	4988	4399	5934	5452	5156	6103	5080	6056	4197	4044	3901	3170	3748	3239	3731	3881	3645	LOC18781851
18767767	5624	5939	6010	4407	4480	5844	6086	5210	5413	6397	6106	5725	8846	7561	7006	5241	4862	5124	4394	4156	3159	5933	4739	5348	5364	5223	5219	4967	4426	5567	5433	5205	5049	5350	5893	5458	3251	4677	5193	5555	3996	5384	2133	1933	3617	3281	3360	3360	LOC18767767
18779005	5313	5620	5803	4737	4531	7112	5702	5109	5576	5752	5376	5586	6573	5915	6484	5957	5616	6453	4231	4296	4716	5030	5200	5240	4735	4761	4820	5757	5140	5467	5264	5254	4720	4384	4530	4044	4999	4938	5501	4577	4587	4256	3920	4051	3630	3440	3799	3722	LOC18779005
18779168	4138	4383	4384	9363	8634	13655	7441	8930	10688	6332	4315	5716	3757	2752	2925	4374	3323	4584	5841	6831	5987	4441	4234	3556	3309	3287	3327	2592	2178	2706	3503	3408	2923	4649	5536	4589	3157	4272	3789	5548	4632	5025	3526	4296	3691	7086	7297	7233	LOC18779168
18769525	863	842	802	2662	2727	3974	5067	4111	4415	5201	4814	4840	6534	5781	5983	5525	5514	6775	3597	3096	3687	5953	6590	6311	4783	5626	5270	6195	5410	5819	5400	4863	5088	5815	6701	5326	6679	5780	6234	6924	6589	6592	4686	5189	4323	5437	5844	5303	LOC18769525
18774349	13267	14028	13998	4411	4574	3947	4254	3716	4214	4329	3960	4670	5081	4581	4872	4100	4048	5015	4015	4264	4607	4126	4112	4212	3629	4293	4031	5468	4562	4886	5019	5377	5239	3730	4360	4596	6011	5555	5162	4619	4458	3775	3912	5355	3791	3696	3980	3626	LOC18774349
18789440	5889	6156	5763	6255	6308	6939	4915	4662	5217	6000	5757	6312	5080	3713	4884	4412	4144	4726	5549	5482	6375	5055	5065	4364	4530	4445	4513	4559	3887	4166	5245	4978	4273	4665	4456	3518	4326	4582	4954	5430	5280	5763	4789	4840	5075	4627	4834	4520	LOC18789440
18769070	5805	5991	5768	4299	4718	4219	5793	4289	5284	5869	6240	6057	6768	6658	7419	6451	5596	6340	4818	4401	4518	5252	5690	5899	5470	5660	5736	6079	5388	5240	4845	4622	4983	5171	5029	4873	5144	4864	5662	3686	3619	3693	2713	3153	2954	2684	2812	2798	LOC18769070
18780744	3710	3894	3960	6118	6059	9198	4970	4692	5572	6506	5711	6094	4424	3347	4116	3828	3691	4816	5660	5713	6657	5073	5206	4169	4331	4219	4047	4341	3701	4429	5328	5294	4150	4292	4532	3539	4110	4519	4753	5861	5989	5947	5697	5959	5581	5603	5804	5663	LOC18780744
18769690	3553	3370	3260	9733	8556	13377	6204	6938	7237	7199	4972	5884	3004	2212	2883	2781	2281	3413	6010	7017	7374	4826	5066	3996	3592	3164	3225	3682	2980	3704	5072	4656	4275	3815	3986	2808	4175	4428	4292	6509	6296	6022	5391	5689	5149	5294	5614	5452	LOC18769690
18789007	3558	3375	3348	6016	5504	7549	5540	5709	6012	5597	4326	5007	4288	3526	3988	4035	3694	4781	4625	4980	5452	4976	5123	4599	3926	4260	4061	4601	3949	4746	5320	5328	4380	4748	5538	4320	6060	5600	5165	6308	6381	6340	5664	5379	5458	5839	5800	5571	LOC18789007
18774331	6196	6529	6646	4904	5338	5549	5904	5591	6067	6642	5535	6040	5953	6231	6089	5582	4852	6021	4476	4286	4886	5227	5108	5284	4792	4666	4632	5480	4917	5520	4858	4572	4248	4807	4938	4531	5148	4901	5137	4416	3795	4113	2968	3287	3214	3515	3513	3229	LOC18774331
18783386	5060	5042	4910	4115	4086	2444	4927	4216	5132	4998	4389	5253	4844	4181	4429	4113	4354	5520	4108	3860	5267	4258	5387	4730	4214	4676	4413	5786	4916	5368	5106	5349	4467	5861	5868	5049	7724	5997	6171	5656	5904	5291	5718	6334	6200	4645	4652	4989	LOC18783386
18791688	2814	2143	2235	7030	6391	7961	9065	10292	11348	6715	4376	4869	4499	3335	3197	4274	3178	5276	3110	4268	3640	5274	5498	3643	4379	3383	3679	3137	2762	4093	5754	4475	4832	7166	7198	4577	3080	4107	3234	5871	5951	5519	4404	3937	4712	6241	6469	6238	LOC18791688
18769795	11339	10816	10843	4407	4348	4433	5025	4015	4836	5196	5140	5141	6732	5874	5933	5410	4890	6086	4650	4329	4531	5362	5349	5338	4780	4672	4692	5363	4808	4770	4800	4603	4616	4879	5051	4540	5065	4465	4922	4079	3947	3797	2280	2277	2565	2752	2628	2711	LOC18769795
18773776	3060	2874	2956	3765	4126	3040	4900	3766	4519	5687	6000	6216	6242	5201	6388	5552	5286	6010	4363	3993	5016	4961	5384	5475	5333	5313	5464	6570	5807	5217	5274	5279	5171	5642	5271	4695	6544	6056	6627	5675	5606	5691	3958	5052	3846	3203	3354	3166	LOC18773776
18769753	7149	7461	7791	4735	5233	3471	4836	4332	5247	5860	5835	6271	5145	4598	5204	4241	3817	4876	5021	4912	6227	4627	4922	4316	4787	4526	4519	4556	4083	4435	5131	5082	4515	4402	4358	4077	6078	4609	4628	5000	4728	5278	4247	4557	4452	4731	4893	4698	LOC18769753
18781883	18289	23400	25104	4108	5131	4215	4260	3031	4151	3849	3659	3189	4880	4936	5706	5077	4618	4771	4683	3233	3480	2857	3038	3163	3008	2932	3029	4920	4093	4745	2522	2480	2592	3359	3185	3166	4786	3677	4819	3060	2782	2609	4420	3777	3962	3999	4151	3344	LOC18781883
18776346	6409	6925	6915	4577	4728	3811	4945	4184	5128	5209	5046	5298	5549	5388	5654	5575	5015	6088	4824	4625	5298	4987	5262	5260	4777	4874	4731	5355	5122	4921	4831	4745	4339	5356	5281	4620	4479	5214	5696	4748	4474	4136	3538	4005	3743	4141	4232	4161	LOC18776346
18771657	4950	4278	4402	4787	4737	4544	5183	4929	6156	5232	3973	4481	4545	4489	4275	4545	4418	5304	4423	4237	5181	5223	5858	5206	4091	4822	4302	5122	4278	5129	4712	4819	4135	5655	6228	5564	6257	5636	5787	5610	5112	5196	3590	3849	3975	5987	5722	6324	LOC18771657
18788617	4001	3642	4236	3852	4023	2965	4830	4695	5153	5511	5079	5919	5576	4833	5277	5348	4654	6352	5013	4399	4738	4867	5932	4743	4826	5142	4538	5327	5118	5522	5682	5548	5011	5388	5325	4996	3546	4895	4742	5471	5450	5139	5164	4713	4765	5067	5036	5196	LOC18788617
18788084	5250	5388	6402	5221	5328	6667	5866	4498	5509	5973	6312	6917	6053	5691	5890	5103	4080	5262	5352	5106	5192	5376	5474	5478	6032	5160	5017	5259	4831	4943	4865	4940	4714	5167	3997	4602	3073	4249	5032	4376	3908	4586	2868	2940	3131	3403	3401	3350	LOC18788084
18766240	6000	6263	6294	4781	4785	4126	5759	4707	5751	6158	6138	6396	7533	7140	7174	6418	5886	6458	4967	4398	4781	5142	5180	5840	5491	5144	5338	5586	5240	4956	4243	4238	4242	5355	4854	4927	4161	4183	4948	3849	3306	3719	2284	2385	2469	2658	2820	2708	LOC18766240
18776275	885	1392	1169	3006	3936	1061	6149	3245	4933	4999	5979	5616	8492	8549	9270	7127	6993	6757	3250	2641	2747	6633	8062	9474	6957	7348	8308	7847	7388	5997	3927	3697	4274	7029	6073	6250	4256	4476	5593	4207	4554	5564	1770	2249	2563	1279	1443	1254	LOC18776275
18771543	4418	4616	4509	4114	4622	5674	5044	3799	4908	6068	6504	6370	6726	5768	6555	5117	4742	5568	5258	4779	5597	5308	4966	5423	5656	4909	5485	5166	5116	4829	5066	4975	4561	4982	4620	4160	4878	4526	5403	4913	4429	4682	3281	3543	3783	3805	3774	3620	LOC18771543
18793001	9648	9318	9771	6812	6527	4068	5252	4560	4877	5877	5979	6181	5501	4558	5318	4777	4975	5530	4257	4221	4274	5162	5424	5722	4453	4632	4450	4500	3868	4252	4829	4800	4089	4230	5236	4751	4444	4944	4500	4326	4004	4392	2331	2460	2824	3278	3237	3181	LOC18793001
18786175	4040	3737	3938	5130	5162	3754	5313	4049	4967	5154	5477	5613	6336	5936	6784	5589	4916	6837	5604	5231	6436	5893	6678	6275	5376	5426	5363	5724	5207	5178	5787	5542	5241	5177	4630	4444	6272	4562	5164	4313	4197	4664	2677	2634	2487	2380	2380	2339	LOC18786175
18778490	6420	6637	6785	5340	5242	5739	5416	4789	5804	6976	6353	6649	6081	5702	5946	5209	4496	5495	4947	4705	5419	5102	5009	4783	4990	4454	4609	4479	4463	4562	4737	4475	4119	4833	3912	3615	4540	3797	4180	4469	4170	4382	2970	3240	3501	4003	4156	4002	LOC18778490
18775277	7721	7644	8156	4621	4835	1392	5682	4144	5243	5347	5782	5968	5915	5834	6104	5282	4768	5941	5133	5083	5759	4931	5533	4965	5166	4838	4774	4630	4438	4599	4647	4532	4413	5069	4436	4770	4809	4060	4569	4272	4043	4202	3261	3168	3213	3864	4092	4011	LOC18775277
18789096	11190	10418	9495	6481	5581	9353	4855	5788	5833	5509	3272	3954	4148	3156	3078	5231	4584	6408	2932	3317	3817	3166	3578	2447	2070	1917	1819	3035	2514	3436	4131	3821	3554	3309	4005	2733	4183	3662	3730	4669	4508	4315	5992	6040	6352	9204	9357	9510	LOC18789096
18792507	6787	6198	6456	5014	4830	3293	5186	4501	5335	5046	4502	5398	4860	4529	4603	4815	4448	5540	4697	4820	4547	4866	5115	4966	4398	4570	4421	5321	4643	5034	5174	5226	4446	4917	4750	4095	3720	5483	5510	5063	5262	4817	4756	5038	4883	4316	4703	4441	LOC18792507
18767555	4326	4205	4020	3865	3890	3445	5925	5168	6097	4827	3792	4182	5068	4362	4856	4783	4630	5853	3152	3074	3764	3983	4699	4319	3545	4498	3876	5229	4450	4742	4791	5088	4687	5600	5084	5220	6920	5623	5976	5572	5488	5055	5639	6150	5365	6576	6561	6895	LOC18767555
18782237	6296	6700	6492	3970	4342	2596	5653	3921	5108	5656	5676	5557	7084	6770	7759	6107	6146	6052	4582	4074	3781	5484	5508	5924	6151	5361	6078	6515	5867	5748	4848	4643	4457	5987	4729	4363	4095	4100	5615	3424	3374	3707	2521	2422	2466	2232	2341	2087	LOC18782237
18775827	7972	6858	7443	4509	4267	4834	4384	4230	4913	5135	4317	5181	4602	3877	4577	4042	3864	4668	3891	3833	4828	3609	4468	3593	3587	3515	3333	4633	3976	3987	4209	4314	3685	4751	4173	3641	5346	4514	5011	5215	4740	4679	5125	6739	6039	8359	8271	8384	LOC18775827
109950420	68760	65264	65646	3298	2231	3292	719	681	864	303	164	208	319	573	365	498	561	444	253	397	289	541	440	501	167	298	242	1106	1161	1443	777	662	862	229	296	225	681	836	909	968	734	712	671	1474	482	812	821	942	LOC109950420
18792133	8062	6884	7132	4422	4420	2533	4765	4221	5097	5005	4849	5516	5217	4057	4736	4582	4270	5380	4787	4747	4459	4410	4992	4295	4075	4045	4042	4804	4155	4486	4573	4626	4152	4770	4450	3862	3539	4674	5218	5539	5536	5079	4804	5633	5583	5587	5992	5991	LOC18792133
18777361	4740	4281	4818	7098	7242	8237	5597	5322	5531	8483	6771	8130	5876	4975	5403	4180	3934	4488	5116	4951	5368	3909	4212	3895	4597	4252	3925	3829	3248	4278	4464	4488	3853	4068	4206	3832	4119	3996	4015	5039	4634	4919	4108	4100	4420	3952	4067	3971	LOC18777361
18775634	6072	5900	6195	6360	5718	5912	5046	5295	6118	5575	4574	5066	5068	4222	4686	4358	3996	4874	4659	4807	5459	4073	4407	4342	3916	3860	3751	4546	4078	4509	4481	4653	4139	4113	4328	3945	5137	4731	4685	5144	4953	4962	4835	5475	4727	5172	5161	4747	LOC18775634
18787507	3802	3666	3637	5601	5643	5847	4817	4573	4965	5554	4931	5217	3932	3040	3352	3239	2932	3847	6622	6667	7364	6028	5852	4897	4562	4305	4310	4854	4304	4700	5562	5298	4567	5850	5995	4358	5530	5613	5556	5538	5444	5329	3975	4274	4255	4038	4001	3999	LOC18787507
18777281	4739	4756	4882	6113	5843	6383	5127	4986	5579	5543	4903	5110	4338	4135	4668	4048	3650	4235	5299	5216	6845	4431	5026	4492	4066	4281	4315	4712	4046	4515	4674	4516	4273	4411	4640	4081	6298	5362	5391	5329	5109	5090	4246	4802	3981	4451	4705	4297	LOC18777281
18769480	4630	4590	4624	5094	5016	6049	4765	4400	4968	5218	5107	5198	5034	4132	4548	4154	3914	4692	5085	5184	5245	5069	5089	5013	4684	4365	4507	4558	4129	4666	5076	5076	4486	4528	5111	4342	4491	4705	4915	5883	5845	5653	4564	4597	4617	4671	4647	4828	LOC18769480
18781692	4264	4052	4144	6130	6196	6167	4606	4921	5476	4808	3787	4100	3736	3128	3741	3877	3376	4047	5078	5376	6188	4496	4474	3783	3369	3320	3218	4129	3570	4227	4789	4520	4131	4223	4808	3582	5860	4824	4710	6270	6369	5953	6079	6950	5979	6416	6973	7132	LOC18781692
18768945	4196	4554	4350	5310	5259	8071	4904	4735	4976	5438	4338	4644	4452	3429	3997	4056	3517	4415	4234	4406	4762	4390	4473	3784	3854	3445	3624	4034	3517	4462	4948	4836	4361	4359	4746	3338	4487	4504	4343	6279	6515	6040	6478	6392	6993	6170	6463	6236	LOC18768945
18789013	5254	5396	5344	4692	5026	8798	5853	4664	5455	6373	6298	6568	5942	5213	5557	4735	4057	5308	5036	4855	5527	5195	5097	4789	5586	4742	4958	4962	4784	4851	5369	5240	4646	4480	4409	3890	4458	3973	4330	4375	3760	4492	2715	2933	3226	2480	2689	2694	LOC18789013
18775545	5408	5044	5267	5012	5084	4827	3947	3877	4651	4665	3810	4613	4025	3132	3920	3817	3711	4282	4409	4502	4810	3901	4075	3693	3282	3492	3467	4104	3456	4051	4480	4628	3926	4074	4598	3814	4630	5961	5967	6670	6789	6273	6780	7341	6859	6947	7611	7245	LOC18775545
18790119	4023	3803	3882	5020	5039	4982	4986	4766	5357	5391	4298	5032	4725	3941	4392	4347	4200	5229	4554	4647	5544	4425	4908	4419	3866	4099	3884	4574	3926	4807	5179	5017	4325	4645	5053	3985	5658	5135	5166	5285	5374	5174	5658	5380	5241	5650	5736	5908	LOC18790119
18783709	6429	6760	6576	4173	4393	4546	5291	4030	5125	5377	5325	5268	6018	5644	6134	5694	5227	5849	4330	4411	4734	4750	5160	5136	4826	5026	5008	5482	4909	4899	4987	4748	4526	5375	4820	4806	4819	4674	5406	4159	4001	4251	2978	3078	3136	2699	2939	2662	LOC18783709
18784759	5737	5956	5816	5408	5379	6744	4528	4839	5343	5068	4296	4349	3968	3290	3777	3874	3327	4362	5015	5477	6269	4794	4791	4034	3511	3546	3511	4261	3738	4452	4752	4614	4174	4320	5354	4077	5877	4847	4469	5370	5366	5073	5015	5930	5348	5295	5641	5239	LOC18784759
18766767	4974	5160	5274	3921	3930	1302	4293	3763	4512	4955	4721	4934	5157	4709	5095	4173	4009	5100	4521	4509	5161	4722	5166	4686	4691	4500	4640	5048	4547	4886	4996	4932	4435	4939	4932	4480	5754	5090	5141	5357	5117	5359	4533	5109	4824	5924	6089	5731	LOC18766767
18775321	4626	4323	4086	4630	4606	4747	4721	4496	5138	5579	4304	5031	5027	4030	4933	4645	4677	6003	4170	4249	5196	3982	4500	4476	3822	4265	3992	4849	4048	4798	4760	4546	4071	4655	4891	4015	6192	5508	5645	5336	5493	5090	4992	6052	5227	4791	5302	5153	LOC18775321
18784083	6471	7313	6893	3434	3725	3157	5042	3299	4403	4794	4905	5136	6451	6105	6504	5867	5695	5877	4657	4337	5155	4970	5417	5780	5471	5673	5688	5947	5387	5027	4682	4678	4240	5507	5045	4672	6352	4509	5481	3438	3326	3425	2372	2658	2614	2416	2487	2377	LOC18784083
18782008	7779	7279	7640	2911	3302	4925	5201	4223	5012	4677	4580	4554	7062	7030	7403	6323	5863	6545	3700	3417	3943	5189	5943	5983	4868	5190	5146	6010	5660	5565	5452	4945	4895	5434	5140	4651	4610	4071	4516	3306	3059	3290	2046	2426	2155	1907	1971	1733	LOC18782008
18783658	4857	4756	4983	4267	4554	5718	5377	4844	5601	5641	5177	5625	5293	4941	5411	4701	4343	5282	4787	4480	5255	5064	5495	5298	5118	5145	4731	5497	4975	5047	4808	4956	4526	4813	4988	4770	5775	4467	4925	4305	4392	4280	3050	3198	2996	3125	3177	3008	LOC18783658
18778596	3564	3602	3843	6239	6038	2440	5239	4596	5752	4637	4315	5470	5271	5481	5067	5504	4581	5610	5561	5349	5231	5214	5344	5480	3815	4767	4079	5348	4951	5343	5056	4728	4390	4762	5472	5821	3959	5718	5808	4569	4329	4218	2485	3293	2458	4150	4450	4134	LOC18778596
18783250	1152	1035	1165	1732	2109	855	2989	2024	2308	3211	4239	5096	7563	5615	7315	6048	5554	7249	4723	4810	5273	5565	6297	5304	5726	5388	5541	6771	6113	5599	6680	7182	7716	5055	4673	3729	4543	4283	3994	6261	7264	5782	4644	4683	4758	3619	4299	3821	LOC18783250
18782543	4671	5715	4288	3456	3659	4199	5590	3981	5546	4332	3153	3235	6255	7106	7362	5666	5414	5058	3252	3341	3508	4642	5157	5816	4755	5073	5105	7498	6461	6393	4430	4364	4510	4915	4653	4714	5735	5843	7622	3752	3915	3681	3069	4443	2897	2842	3066	3064	LOC18782543
18791458	3161	3518	3390	5455	5434	9260	6775	7521	6747	9173	6084	7528	5843	4882	4812	4947	4329	5968	4577	4442	4838	5104	5468	4108	4093	4189	4142	5102	4088	5618	6206	5577	5335	4087	4776	3032	4404	4186	4365	3592	3423	3318	2469	2467	2523	2252	2252	2294	LOC18791458
18788192	4926	5489	4218	6593	5374	6390	7648	8048	7037	7641	3833	5967	4654	4492	3791	4084	3288	4443	4886	6420	6581	5287	5277	4018	2495	2637	2774	4500	3913	4761	4821	4310	4453	3774	4386	3214	4884	4938	4784	3960	4384	3878	4006	4336	3630	4090	3666	4025	LOC18788192
18786835	5820	5817	5851	4407	4610	3482	5096	4366	4985	5863	5105	5486	6053	5564	5623	5219	5391	5977	4158	3791	4293	4421	4978	4854	4764	4823	4432	5416	4677	5178	4889	4711	4377	5159	4980	4374	5176	4936	5094	4265	4172	3909	3468	3523	3434	3256	3313	3244	LOC18786835
18792067	4379	4190	4179	3817	3855	3770	3875	3676	3942	3584	3484	3433	4086	4041	4649	4515	4163	4312	4200	4618	5475	4209	4524	4607	4362	4211	4382	4657	3734	4264	3944	4627	3783	4035	4872	4360	6968	5312	5448	6161	6438	6202	5832	5967	5437	7301	7692	6995	LOC18792067
18781581	3666	3927	4292	3910	4442	2969	5032	3596	4693	5524	6638	6218	6131	5478	6565	4652	3952	4460	4913	4407	5306	5121	5153	5654	6409	5535	6149	6023	5468	5037	4740	4740	4724	5581	4484	4664	6775	4449	5536	4242	3759	4438	2389	2993	2678	2907	2954	2671	LOC18781581
18767296	1506	914	1069	8038	7043	4397	5308	4468	5769	3924	3810	4487	4125	3671	4060	4762	4061	5815	6289	7098	7699	5454	5908	4897	4135	4814	4401	4128	3930	3906	5912	5572	4634	4412	4524	3623	4531	5088	4743	5419	5678	5362	4773	4717	3588	4165	4408	4222	LOC18767296
18778016	4607	4341	4268	3904	4120	4593	4320	3925	4349	4983	4169	4590	4470	3704	4191	4184	4097	4884	3768	3660	4676	3902	4111	3736	3565	3747	3774	4774	3978	4551	4639	4589	4216	4665	5092	4070	6193	5407	5788	6253	6206	5511	6171	6783	6246	5478	5961	5809	LOC18778016
18772269	6190	5721	6119	4653	4879	3154	5502	5240	4322	8332	6889	8573	5143	3906	3611	2796	3083	5579	5305	5119	5072	5173	6016	4673	4214	3830	3424	4037	3498	4151	6987	6178	5780	4312	4700	3584	5709	6083	6215	3945	4482	4153	3686	2343	2770	1995	1955	1908	LOC18772269
18791900	10757	14834	13536	2736	3187	1589	4482	2649	3690	4112	4733	4401	6542	6367	7422	6600	5955	6393	4613	3039	2923	4835	5411	6321	5254	5419	5824	6176	6023	4995	4079	3786	4144	4908	3953	3779	3942	3468	5333	2235	2309	2225	1543	1618	2273	1497	1710	1363	LOC18791900
18783781	4878	4960	5616	4724	5114	4065	5907	4438	5562	6046	6773	6937	6702	6653	6740	5243	4722	5279	5039	4253	3928	4883	5014	5508	5648	5232	5407	5268	4857	4506	4255	4081	4172	4825	4245	4291	3273	4076	4790	3677	3275	3922	2010	2518	2375	3214	3007	2975	LOC18783781
18770366	5405	7481	5538	2516	2696	788	6469	3591	4575	3269	2343	2431	7697	10609	10116	6605	6301	5744	2343	2001	2414	5112	4750	7864	4678	4424	6307	11265	11112	8433	4060	4992	5347	3621	2645	3631	7034	7609	9805	1451	1578	1619	1197	2449	1054	627	667	559	LOC18770366
18793498	6247	5830	5929	4924	5252	3489	5270	4428	5295	5861	5589	5713	5632	4645	5539	4820	4424	5229	5226	4689	5790	4879	5271	5451	4908	5033	4934	4816	4468	4470	4741	4575	4337	4033	4456	4119	5466	4631	4792	4170	4354	3852	2753	2994	2810	2700	2819	2955	LOC18793498
18790103	7768	7427	7940	6418	6511	5148	4761	4568	4420	5806	5337	6391	6325	4656	5348	4459	4665	5652	5673	4948	5854	4994	5357	4855	3829	4199	3879	4271	3686	4299	5205	4819	4703	4350	4635	3842	4463	4566	4308	3485	3473	3479	2186	1816	2441	2454	2357	2391	LOC18790103
18768638	2844	2533	2396	7984	7405	8225	5465	6303	7014	4890	3405	4441	2423	2290	2424	2717	2221	2748	6199	6612	7109	4550	4216	3736	2939	2972	3035	4134	3412	3926	4482	4874	4166	4414	5769	5394	5595	5736	5470	4275	4207	4136	4771	6553	4213	6333	6846	6596	LOC18768638
18780643	6340	6722	6452	4183	4444	2852	5439	3738	5011	5595	5920	5499	7449	7689	8634	6400	6026	6018	4532	3931	3962	5205	5289	6322	6003	5360	5826	5984	5968	5481	4041	4168	4077	5702	4113	4203	4088	3490	5026	2715	2332	2797	1572	1672	1672	1425	1552	1409	LOC18780643
18776450	6829	6710	6541	3820	3655	3546	4208	4252	4591	4989	3720	4531	4361	3623	3528	3903	3607	5120	4060	3843	4421	3903	4107	3452	3125	3443	3111	4875	3868	4805	4961	4633	3977	3967	4199	3023	5294	4985	5244	6820	6721	5783	6193	7478	6379	5097	5500	5503	LOC18776450
18785415	5244	5398	5201	6309	5825	11152	6059	5623	6268	7105	5097	5457	5362	4855	4936	4649	4252	5319	4485	4563	4824	4766	4777	4710	4006	3864	3824	4367	3835	4483	4279	4046	3642	4374	4709	3814	3757	3819	3846	3864	3699	3735	3234	3082	3364	3364	3384	3303	LOC18785415
18775031	21128	14821	17939	3979	4908	2523	3482	2808	3038	4652	5213	5774	4948	4429	5257	4073	3792	4103	10197	7434	10395	3608	3692	4141	3310	3364	4198	4697	4194	4277	3256	2969	3155	3837	3357	2812	2518	3299	3806	2265	2040	2239	1326	1450	1811	1028	1227	1080	LOC18775031
18766098	5142	5961	5449	5983	5769	7857	5373	6508	7004	6370	4538	5018	3362	2643	2862	3164	2846	4006	4537	5222	4550	5332	5383	4233	3914	3709	3988	3804	3035	4392	4984	4691	3947	4256	5163	4074	2816	4487	3944	5340	5067	4949	3610	4333	4090	5109	5486	5338	LOC18766098
18775633	5101	4452	5030	4160	4147	3296	4746	3630	4562	5388	5444	5463	5296	4853	5588	4552	4310	5148	5035	4498	5624	4609	4823	4631	5018	4659	4663	5226	4586	4433	4629	4654	4300	4864	4075	4057	5033	4401	4996	4614	4684	4873	3794	4331	4025	4473	4565	4218	LOC18775633
18778593	6289	6179	5826	7228	7007	7348	4873	5335	5880	6125	4299	4999	3139	2394	3059	2784	2444	3249	5010	5375	5999	4838	4807	3733	3748	3508	3601	3741	3048	4031	4805	4548	4079	3974	4581	3147	4364	4503	4358	5378	4961	4996	4603	4937	4688	5347	5240	5128	LOC18778593
18767220	5225	4242	4888	4989	4910	2177	4837	4248	5284	4983	4907	6239	5283	3756	4342	4274	4149	5541	5442	5095	4790	4723	5203	4344	3920	4126	3987	3858	3315	3926	4874	4809	4084	4514	4697	4162	2837	5183	5011	6036	5754	5748	4670	4185	5194	4374	4848	4935	LOC18767220
18778995	2437	2474	2413	9159	8385	11593	4243	4973	5135	5385	3953	4774	2843	1926	2353	2368	2121	2870	6756	7574	8506	4179	4186	3501	3000	2629	2848	3002	2534	3395	4586	4451	3913	3826	4776	3364	6102	5328	5150	5829	5936	5757	4697	5218	4361	5876	6207	5795	LOC18778995
18768866	5304	5470	5802	3339	3462	2258	4903	3651	4902	4471	4437	4836	5985	5458	6297	5916	5381	6435	4074	3907	4099	4547	5055	5057	4963	5022	4837	5622	5116	4932	4718	4717	4784	5132	4676	4599	4426	4917	5293	4175	3922	4169	3518	3420	3481	3611	3835	3638	LOC18768866
18774944	3765	4099	4352	3513	3568	2581	4740	3761	4723	4886	4582	4722	5248	4660	5142	4981	4727	5232	4224	4247	4989	4368	5124	4789	5011	4795	4573	5497	4811	4931	4889	4617	4332	5235	5028	4521	6333	4982	5863	4914	5304	4851	4108	4542	4370	3874	4185	3868	LOC18774944
18789304	4895	4582	4440	3988	4231	3999	4189	3476	4233	4689	4333	5057	4717	4004	4850	4322	4510	4790	4125	3506	4457	4117	4925	4240	3834	4418	4195	5281	4205	4866	4701	4869	4228	5123	5111	4570	5894	5651	6044	5683	5722	5177	4939	5200	4924	4089	4423	4368	LOC18789304
18785015	3540	3320	3786	3610	3465	7071	6584	5760	6445	4591	3625	4008	4813	3912	3979	4298	4526	5747	2747	2849	3205	4346	5063	4264	3508	4300	3521	4125	3569	4001	4178	4098	4000	4359	5041	4781	5531	5307	4744	5972	5673	5867	4691	4624	4786	6494	6570	6769	LOC18785015
18789555	583	295	509	1649	1882	2301	3582	4510	4279	2953	2713	2101	3833	3610	4234	4212	3524	4284	2100	1694	1772	3701	3645	3154	5130	3064	4469	3991	3311	4923	4929	4049	4827	7859	6314	3642	3170	5436	4193	8035	8008	8502	8563	10123	14523	8807	9267	9721	LOC18789555
18782349	1171	1095	983	2885	3173	3681	3985	3713	4077	3985	3726	3820	4061	3661	4248	4102	4032	4332	4233	3771	4394	4290	4471	4386	4353	4861	4559	5694	4256	5405	4498	4707	4447	4604	6079	5741	6711	5767	6458	7827	6958	6676	5876	7527	5600	5427	5700	5480	LOC18782349
18791390	583	582	716	2915	3506	1461	4769	3454	3774	4881	5761	6266	6509	4984	6158	5539	5311	6187	5331	4745	5871	5200	5901	5540	5743	5799	5543	5552	4873	5200	5899	5609	5377	4984	5896	4849	7141	5906	6048	5549	4731	5529	2102	2268	2750	2715	2618	2561	LOC18791390
18782274	4696	4877	5159	3737	3949	2532	4081	3591	4235	4723	4415	4566	4781	4350	5111	3895	3844	3969	4920	4299	5243	4712	4771	4983	4225	4337	4301	4864	4188	4495	3892	3756	3603	4511	5202	4913	5617	5429	5660	4766	5015	4757	5389	5222	4606	5476	5671	5657	LOC18782274
18774569	5071	5249	5176	5204	5394	7244	5304	5028	5357	5790	4929	5210	4822	4251	4699	4503	3895	4365	5204	4755	5580	4501	4489	4369	4180	3770	3902	4343	4106	4118	3981	3918	3652	4311	4735	3940	4908	4162	4545	4761	4762	4298	3504	4267	3708	4059	4270	4292	LOC18774569
18790137	4766	4519	4379	4921	4743	4557	4339	3832	4717	4727	4313	5020	4690	3897	4600	4322	3949	4816	5325	5480	6565	4456	4849	4358	3787	3948	3887	4368	3735	4051	4743	4450	4133	4515	4690	4004	5503	4742	4955	4939	5420	4966	4516	4700	4120	4683	5039	4711	LOC18790137
18771681	4567	4390	4724	4010	4096	4054	4182	3989	4164	4687	4833	5209	5116	4231	4778	4292	3929	4742	4337	4139	4812	4312	4375	3868	3895	3848	3783	4259	3549	4300	4381	4495	3954	3876	3923	3259	4550	4679	5024	5834	5156	5831	5865	5945	5975	5863	6481	6100	LOC18771681
18775279	13669	11977	12053	16592	14358	10198	2866	3235	3649	3952	3605	4957	1237	959	1811	1246	866	1475	16171	16924	24311	3393	3232	2914	1315	1248	1461	1512	1237	1539	1849	1584	1673	1973	2240	2091	3690	3081	2592	1938	1483	1896	1480	2062	1528	1881	1759	1745	LOC18775279
18779725	5147	5144	5277	5115	4912	3967	3655	3674	4167	4308	4023	4758	3958	3283	3857	3583	3201	4205	4650	4438	5102	3866	4240	3365	3473	3313	3172	3921	3309	3724	4633	4244	3964	3754	3750	3068	4418	4903	5153	7150	6824	6284	5645	7099	5707	6949	7166	6807	LOC18779725
18784435	1742	1085	1509	4171	5190	783	6772	3340	6117	4654	6083	6428	7264	7924	9112	7029	6229	5765	5069	4059	5363	4834	5339	6158	6639	6056	6679	6040	5927	4229	4005	4215	4509	5470	4163	4848	4474	5003	6031	3297	3275	3953	1608	2687	1099	1308	1481	1114	LOC18784435
18772421	3659	3855	4522	4930	5116	5994	5688	4883	5546	6559	6605	6587	5301	5126	5342	4519	3778	4744	4690	4718	5131	4764	4816	4719	5136	4686	4741	4694	4462	4223	4209	4343	3943	4323	3920	4114	4181	3974	4506	4518	4153	4785	2887	3056	3103	3339	3358	3319	LOC18772421
18772360	3651	4622	3913	6272	5745	4264	6569	6918	7267	6177	3956	4991	4038	4381	4173	4164	3467	3893	4441	4902	5202	5249	5241	5542	3876	4030	4136	4797	4442	4583	3757	3853	3511	4381	5327	5066	5885	4899	4844	3515	3621	3432	3519	3989	2751	3774	4030	3976	LOC18772360
18777117	3269	3272	3460	4492	4545	3304	4706	4386	4498	5284	4469	4773	4947	4716	4851	4726	3763	4823	5198	4803	5018	4961	5246	5376	5293	5063	4691	5844	5356	5849	5037	4753	4677	4996	5030	4853	4574	4746	4749	4445	4249	4176	3728	3668	3528	3560	3557	3592	LOC18777117
18767483	2441	2196	2127	8839	8022	9305	5529	6726	6509	8325	5850	6402	4601	3489	3543	4290	3736	5495	6039	5094	4906	3928	4647	3958	3330	3450	3151	4740	4072	4473	4310	4427	3852	4330	4437	3723	3439	4680	4685	3716	3991	3333	3514	3925	5100	2719	2723	2369	LOC18767483
18776075	4371	4492	4790	4533	4869	6969	4925	3759	4433	5779	5747	6398	5287	4925	5063	4277	3551	4660	4789	4391	5171	4450	4533	4630	5153	4552	4346	4678	4472	4236	4071	4142	3825	4411	3680	3813	4781	3822	4430	4378	3876	4610	3298	3515	4421	4574	4258	4276	LOC18776075
18768676	3204	3035	2684	6713	6222	3900	5350	4912	5751	5225	4548	4833	4561	3826	4380	4234	3845	5065	4571	4378	5211	4727	4795	4491	4200	4094	4343	4481	4014	4362	4687	4865	4314	4246	4539	3597	5387	4602	4791	4917	5152	5137	3981	4681	3767	4270	4649	4388	LOC18768676
18784893	4850	5231	5093	3551	3980	1971	5064	3283	4818	5373	6374	5774	6239	6255	6713	5278	4392	5104	4999	4343	4129	5089	5349	5882	6461	5623	6033	5835	5640	5157	4566	4542	4709	5518	4318	4606	3479	4145	4993	3577	3193	3776	1995	2111	2287	1985	2080	2058	LOC18784893
18776239	4169	4691	4646	3743	3949	3823	4848	3346	4736	5809	6515	6239	6525	6062	6602	5114	4832	5330	5088	4500	4014	5224	4877	5701	6172	5519	6175	5946	5314	5239	4674	4638	4477	5101	4280	4531	3585	3769	4409	3515	2786	3736	1955	2043	2475	2191	2388	2214	LOC18776239
18784754	4867	4306	4241	9224	7835	8277	5814	6973	7663	6377	4505	5289	2868	2377	2237	2145	2243	3403	5017	5413	6131	4786	5231	4100	3222	3805	3148	3362	3029	3338	4518	4290	3916	3104	4141	2914	4845	3962	3761	4956	5420	4768	4643	4009	3606	4455	4514	4434	LOC18784754
18788733	4274	3877	3990	5273	5284	4241	4426	4776	5035	5059	4308	4926	4275	3595	3795	4258	3664	4600	5319	5435	4772	4450	4664	4337	4139	4037	4168	4566	3948	4666	4710	4457	4145	4802	4838	4053	2857	4871	4973	5485	5291	4848	4361	5267	4393	4291	4787	4885	LOC18788733
18788023	5013	5150	5495	4161	4373	3988	5299	4037	4737	4905	4874	5102	5275	5186	5534	4908	4111	5132	5192	4878	5624	5184	5479	5944	5300	5176	5371	5436	4975	4680	4747	4740	4664	4900	4452	4522	5174	4418	5066	3524	3522	3450	2395	2531	2106	2196	2274	2228	LOC18788023
18788435	5086	6346	5632	5560	5387	3790	3297	3645	4122	4050	3651	3981	2422	1879	2595	2318	2184	2540	4027	3894	4476	3370	3589	3121	3091	3223	3038	2746	2257	2931	3053	3298	2480	4145	4594	3976	5834	5082	4918	7490	7597	7008	7024	8016	7552	8580	9096	8906	LOC18788435
18782772	4269	4140	4252	4571	4567	5173	4755	4275	4720	4748	4452	4914	4616	4057	4402	4268	3926	4962	5091	4900	5316	4902	5099	4507	4080	4328	4143	4643	3873	4613	4688	4536	4094	4063	4885	4208	4626	4997	5010	5071	4894	4963	3860	4302	3865	4079	4215	3825	LOC18782772
18791346	2616	2422	2239	5368	5245	7519	4661	4922	4741	6301	4747	5167	4628	3305	3275	4816	4855	6386	4488	4626	5011	4383	5034	4104	3168	3382	3143	4754	4105	4835	4354	4086	3480	5946	5812	4043	5380	5026	5383	4941	5308	5002	3961	3884	4414	3887	3839	3501	LOC18791346
18769132	4434	4189	4286	5384	5305	9397	4100	4341	4631	4937	4359	4313	3695	3042	3701	3717	3330	4042	4332	4186	4366	4246	4219	3650	3510	3331	3484	3812	3141	3724	4182	3999	3373	4087	4528	3273	3897	4382	4334	5410	5671	5242	5465	5733	5879	6457	6774	6419	LOC18769132
18769177	4619	5056	5329	4485	5031	2837	5297	3931	4905	5137	6260	6194	5853	5714	6014	4735	4203	4654	5146	4517	4543	5197	5235	5701	6135	5131	5561	5403	4958	4963	4469	4361	4254	4895	3782	4351	2720	3870	4644	4123	3309	4105	2275	2474	2403	2413	2553	2483	LOC18769177
18781709	713	738	699	3334	4359	1439	5558	2676	4757	4640	5291	4722	6658	7205	8454	7099	6786	5414	4573	3681	4691	4663	4988	6973	7151	6207	6845	7505	6811	5019	4259	4421	4962	4669	3932	4448	4881	6412	7211	3401	3910	3357	1791	3220	1317	1362	1708	1052	LOC18781709
18788298	4553	4864	5168	3266	3619	2719	4509	3547	4319	4880	4551	5235	4917	5093	5281	5680	5109	5710	4061	3609	4765	4321	4872	5226	4481	4916	4436	5739	5096	5258	4661	4522	4380	4612	4734	4439	5433	5534	6146	4607	4214	3933	3172	4079	3070	2780	3012	2674	LOC18788298
18788290	3232	3481	3444	5235	5047	6248	4668	3996	4679	5136	4387	5140	4369	4755	4675	4426	4244	4695	4243	4155	4887	4522	4845	5246	3874	4572	4349	5836	5133	5077	4474	4528	4456	3829	4159	4193	5704	6340	6609	5251	5033	4245	3252	4364	2921	2444	2678	2370	LOC18788290
18778247	4761	4355	4480	3052	3549	2903	6461	4583	6067	6444	6866	6395	7453	6389	6836	6003	5505	6137	3677	3428	3783	5397	5652	6214	5682	5428	5160	5888	4991	4357	4558	4364	4723	3078	3622	3736	5409	4421	4683	3345	3134	4033	1654	1858	1808	1074	1107	933	LOC18778247
18766151	1707	1457	1450	7846	7107	7083	3819	4502	5153	4595	3949	4352	1931	1321	1820	1682	1472	2216	6425	6733	7593	4182	4205	3269	2793	3001	2689	2809	2154	2829	4402	4374	3462	3819	4788	3595	5138	5495	5132	7587	7128	6793	6270	7814	5779	7247	7315	7095	LOC18766151
18780664	3904	3956	4043	4079	4562	3270	3909	3771	4313	4311	3640	4301	4643	4015	4466	3950	3684	4727	4353	4296	4871	4390	4808	4478	3822	4400	3934	5130	4447	4720	4386	4282	4132	4893	5018	4794	5311	5322	5385	5012	5169	4841	4781	5612	4508	4668	4822	4922	LOC18780664
18789553	6920	9601	9451	3969	5602	2561	5832	3692	4395	3741	3580	3327	6324	7703	7893	6212	5521	5494	4777	2770	3224	3844	3545	5275	3381	3250	3679	7360	6499	6668	2860	3402	3187	3643	2661	3191	4432	4414	5743	2052	2403	1987	5063	3096	3146	2566	2836	2140	LOC18789553
18770634	5798	5754	6412	4686	4916	3467	5307	3857	5003	5348	5591	5952	5587	5838	5901	4925	4242	5086	4867	4311	4156	4807	5136	5219	5586	4940	4982	5299	4533	4924	4533	4497	4429	4933	3697	4187	2173	3874	4682	4051	3349	3927	2167	2316	2365	2252	2396	2428	LOC18770634
18786680	5010	5035	5301	3084	3728	757	4408	3398	4208	4383	4455	4974	5960	5339	5917	5646	5223	5802	4110	3828	3821	4549	4799	5028	4796	4860	4886	5778	4818	4936	4762	4664	4531	5391	4676	4574	4723	4661	5541	3805	3868	4018	3318	3415	3480	3280	3518	3458	LOC18786680
18780769	2337	2593	2549	4269	4741	2016	5612	3582	4959	4086	4172	5099	6012	6527	5534	7284	5703	6931	4718	4172	3773	4618	5433	4971	5061	4931	4711	5861	5881	5287	4546	4770	4643	4722	4077	4520	2170	4103	4047	3826	4620	4004	3942	3608	5589	2802	2751	2222	LOC18780769
18776985	5908	5547	5638	4250	4584	2499	4563	3793	4575	5073	5038	5266	5493	5244	5835	5541	5047	5570	4760	4018	4145	4586	4981	4415	4775	4358	4386	5186	4452	4631	4609	4509	4094	5158	4574	4095	3267	4398	4855	4041	3734	3952	3125	2958	3368	3039	3222	3002	LOC18776985
18788627	5519	5827	5760	5526	5539	8302	5275	5810	6425	5840	4944	5071	4176	3593	3917	5091	4436	5119	5222	5424	5279	3912	3866	3500	3308	3189	3384	3396	2903	3601	3629	3346	3125	4471	5275	4219	3966	3438	3614	3777	3199	3698	2875	2761	3287	5508	5239	5535	LOC18788627
18788242	5203	4879	5041	3137	3427	2040	4082	3077	4053	4168	4087	4645	4935	4203	5046	4466	4561	5110	3535	3368	4448	4027	4707	4554	4357	4791	4622	5105	4484	4356	4621	4476	4162	5127	4593	4246	6159	5380	5570	4758	4884	4542	4183	4678	4339	4330	4746	4596	LOC18788242
18766680	5760	5439	5371	4932	5017	2753	4777	4728	5334	4249	3444	4049	3896	3436	3519	3324	2904	4104	4678	4950	5556	4394	4811	3937	2957	3268	3078	3819	3207	4095	4305	3958	3420	4685	4941	4532	5627	4939	4949	5782	5639	5268	4623	5461	4587	4912	5389	5004	LOC18766680
18787950	4839	4517	4847	4626	4782	5173	4113	3845	4490	4610	4516	4448	4221	3682	4211	3759	3370	4203	4930	5079	5713	4745	4847	4338	4186	3949	3882	4362	3617	4226	4459	4517	3785	4386	4803	3942	4706	4511	4361	5192	4959	5177	4396	4256	4299	4724	4483	4603	LOC18787950
18767936	5461	5359	5552	4367	4153	1765	4702	4246	5163	5071	4433	4944	5118	4592	5042	4693	4581	5481	4540	4389	4334	4678	5124	4994	4175	4479	4384	5215	4787	4892	4651	4459	4027	4789	4864	4134	3972	4640	4744	3926	4071	3911	3388	3452	3499	3508	3539	3394	LOC18767936
18768334	3320	3022	3229	4737	4390	5340	4836	5085	5564	4594	3670	4161	3967	3149	3373	3820	3681	5096	3957	4051	4157	4201	4632	3780	3236	3737	3149	3992	3492	4154	5226	4834	4259	4386	4905	4052	5212	5154	4636	5447	5614	4967	4996	5266	5090	5936	5897	6190	LOC18768334
18785245	12246	11216	11889	6156	5881	14148	4802	5837	5359	5960	4134	4436	3554	3663	3218	3736	2593	3224	4859	4946	5902	4292	4363	3381	3441	3469	2845	3585	2944	3936	3040	3212	2765	3923	4049	3901	3823	2818	2976	2839	2945	2792	2482	1950	2430	2681	2534	2400	LOC18785245
18768702	1251	1262	1162	7399	6594	5441	2957	3862	4165	3447	2468	2549	1604	1369	1872	1696	1572	2229	5197	6295	7566	3330	3245	2743	2113	1942	2037	2397	2127	2389	3442	3945	2652	2897	3392	2468	5231	4448	4285	7459	8489	6812	9284	11792	8990	11055	11266	11053	LOC18768702
18776752	5462	5478	5281	5749	5710	5736	4572	4602	5360	4876	4098	4119	3755	3637	4046	3630	3540	3652	4873	4573	5389	4375	4479	4462	3778	3788	4053	4822	4080	4373	4084	3959	3714	4696	5189	4534	5369	4813	4676	4454	4309	3867	3514	3955	3163	4288	4296	3953	LOC18776752
18785272	4276	4311	4818	3839	4320	2921	4877	3683	4724	5672	6000	6125	5868	5432	6052	5043	4271	4960	4881	4438	4553	4648	4695	4847	5418	4839	4846	4990	4484	4234	4111	4302	3975	4658	3942	4443	3664	4177	4769	4274	3829	4574	2796	2654	3006	3406	3243	3176	LOC18785272
18793691	6810	6746	6615	4119	4446	2143	4851	3795	4518	4532	4454	5035	5428	5045	5465	4893	4370	5023	5064	4655	4800	5089	5325	5570	4862	5060	4831	5082	4603	4559	4310	4418	4192	4626	4618	4351	4331	4330	4674	3696	3309	3579	2495	2430	2602	2387	2330	2304	LOC18793691
18774193	12341	14846	14143	9745	8345	6855	4665	6038	6316	4861	4223	5086	2613	2254	2218	2377	2062	3600	4527	5539	4860	3531	3647	3096	2310	2476	2241	2629	2301	2717	3135	3135	2347	3375	4010	3088	3183	4030	3150	3278	2771	2855	2870	3507	2910	3976	4280	4263	LOC18774193
18791854	3864	3881	3821	4414	4448	6768	4556	4178	4770	5172	4215	4420	4252	3533	4041	3863	3343	4166	4491	4543	5327	4361	4773	4313	3948	3964	3796	4484	3839	4193	4861	4851	4071	4291	4767	3774	5204	4280	4639	4889	5105	4782	4824	5073	4808	4120	4432	4096	LOC18791854
18788473	4531	4963	4496	6193	5516	8086	5098	5289	6529	6804	4740	5412	4057	3666	3900	3768	3497	4391	4872	4933	5505	4759	4712	4420	3802	3703	3697	4434	3809	4346	4225	3874	3703	3910	4538	3618	4444	3958	3812	3927	3673	3680	3406	3356	3176	3748	3840	3618	LOC18788473
18789315	905	1047	1008	3461	3669	4893	3959	4234	3673	4840	4227	4692	4450	3524	3988	4035	3251	4047	5321	4945	6099	4471	4582	4197	3782	3715	3632	4957	4032	5073	5062	4791	4399	4163	4837	3593	5995	5400	5667	5953	5592	5524	4469	6400	4579	5662	6034	5485	LOC18789315
18780967	4672	4371	4150	5022	4889	7820	5085	5126	5244	5439	4452	4710	4642	4008	4340	4287	3904	4746	4384	4475	4528	4641	4780	4298	3994	3978	3712	4339	3759	4538	4720	4546	4173	4208	4505	3786	3731	4321	4339	5186	4880	4757	3477	3428	3561	3351	3416	3318	LOC18780967
109950421	6869	6456	7871	6750	5827	9113	4655	5641	6720	3735	2595	3364	1851	1808	1518	2242	1546	2995	4094	4972	5514	3777	4586	3178	2617	2642	2219	3828	3377	4312	4155	4603	3506	3422	3356	3142	3608	4594	4368	5252	5211	5102	6462	6718	4937	5099	5614	6126	LOC109950421
18766878	4047	3483	3356	4984	4936	7615	4575	4489	4819	5173	4274	4726	4169	3507	3957	3777	3659	4421	3725	3988	4349	3362	3861	3502	3367	3346	3438	3849	3221	3698	3973	3991	3391	4220	4286	3477	5182	4665	5074	5241	5309	5256	5484	5785	5259	5773	5902	5965	LOC18766878
18784991	5541	5332	5249	3261	3593	2447	4281	3325	3962	4967	4728	5352	5579	4823	5558	4718	4922	5541	4098	3864	4346	4368	4915	4992	4562	5002	4820	5366	4768	4622	4533	4428	4146	5332	4644	4330	4727	4849	5219	4048	4029	4028	3247	3347	3436	2764	2854	2838	LOC18784991
18771674	3699	3841	4042	4487	4550	4373	4842	3903	4541	5291	5539	6118	5244	4973	5530	4542	4014	4874	4464	4321	5088	4494	4726	4523	4971	4270	4443	4637	4198	4257	4693	4825	4179	4267	3730	3895	4122	3897	4439	4235	3783	4581	3230	3360	3740	3956	4072	3653	LOC18771674
18787054	3772	3509	3537	5122	4690	7000	4349	4573	4907	5067	4171	4560	4316	3506	3932	3884	3780	4214	4346	4384	4779	4212	4115	3787	3410	3383	3428	3913	3334	3831	4199	4099	3493	3904	4531	3521	4592	4358	4662	5238	5307	5043	4836	5330	4936	5527	5932	5870	LOC18787054
18786541	4118	4103	4199	4715	4732	6164	4067	4452	4745	4983	4009	4451	3724	2944	3327	3535	3290	4012	3791	4010	4499	3517	3567	3271	3162	3342	3322	3573	3001	3556	3820	4006	3372	3755	4464	3453	4848	4708	4620	6054	5944	5723	5492	6293	5952	6568	7022	6818	LOC18786541
18792742	4859	5143	4988	4042	4131	3122	4160	3669	4211	4883	4349	4943	4694	4095	4864	4201	3990	4631	4406	4129	4352	4360	4610	4383	4406	4473	4329	4744	4111	4729	4519	4395	3763	4621	5033	4095	4613	4537	4812	4463	4422	4374	3804	4107	4167	4374	4333	4239	LOC18792742
18768578	4475	5027	5101	4136	4204	4426	4729	3667	4404	5567	5283	5676	5654	4972	5395	4697	4381	5084	4827	4448	4658	4672	4668	4846	4721	4449	4843	4632	4232	4325	4336	4053	3979	4523	4137	3850	3844	3838	4506	4076	3852	4024	2727	2951	3184	3356	3591	3320	LOC18768578
18793354	4049	3489	3735	4647	4602	3360	4023	3547	4270	3952	3874	4356	3939	3470	3924	3811	3611	4728	5053	5556	6285	4281	4575	4023	3821	3778	3770	4659	4090	4416	5077	5192	4194	4170	3952	3590	4865	4245	4183	4655	4606	4605	4518	4991	4510	5712	5520	5331	LOC18793354
18773766	4446	4002	3992	3487	3695	2263	4243	3497	4192	4545	4121	4956	4732	3829	4607	4426	4283	5198	3944	3806	4647	4123	4922	4311	3948	4450	4320	4819	4208	4530	4485	4364	4220	4575	4659	4114	5093	5053	5369	4867	5051	4717	4339	4820	4756	3894	4386	4287	LOC18773766
18776049	1359	1491	1409	2709	2697	2773	4791	4674	5508	4071	3392	2654	5751	4676	4211	5937	5274	6135	2604	2216	1984	4603	4044	3806	3661	3349	3372	3494	2781	3491	2867	2622	2382	6719	6808	4740	3437	3963	4213	6752	5624	5773	5999	6185	6435	8258	8761	8989	LOC18776049
18786630	5288	5507	5351	4427	4397	2425	3388	3443	3921	4410	3864	4246	3955	3067	3926	3686	3119	3836	4317	4084	4462	3638	4019	3413	3512	3204	3387	4078	3413	3832	3945	3840	3475	4379	4429	3574	4440	4722	5075	5455	5301	5357	5471	5847	5467	6912	6997	6721	LOC18786630
18772312	5746	6000	6258	4404	4277	6129	3812	3773	4387	4433	4053	4161	4229	3489	3851	3995	3668	4624	4399	4184	4845	4012	4214	3881	3682	3597	3462	4413	3705	3917	3899	3907	3336	4468	4760	3776	5083	4309	4649	4529	4504	4193	4312	4559	4523	4874	4884	4593	LOC18772312
18789124	1918	2691	2530	2820	3771	1746	4383	2549	3729	4600	5975	5136	7367	8676	8733	5973	4946	5420	4820	3324	3752	4262	4796	5954	4271	4643	4981	7428	6229	6370	3567	4053	4161	4082	3608	3783	4914	5110	6088	3537	3773	3213	2754	3243	2859	1911	2259	1774	LOC18789124
18775008	5295	4698	5178	4172	4139	2880	4314	3718	4473	4604	4220	4435	4973	4401	5015	4673	4626	5337	4398	4067	4365	4183	4626	4231	4268	4295	4326	4976	4272	4563	4754	4680	4324	4664	4670	4059	3761	4358	4608	4495	4277	4194	3462	3755	3777	3403	3709	3673	LOC18775008
18779859	5988	5829	5674	4383	4412	4492	4752	4047	4688	5462	5036	5048	5360	5030	5404	5003	4587	5354	4125	4076	4136	4234	4542	4513	4326	4343	4358	4591	4204	4504	4127	3961	3879	4625	4311	3815	4205	4004	4475	3754	3731	3695	2901	2851	3097	2757	2883	2759	LOC18779859
18775166	870	647	894	8361	10458	5155	5319	6043	6906	8313	8784	9234	5422	4057	4949	2985	3209	5237	6924	6109	8366	3570	4579	3155	3242	3307	3212	3521	3361	3825	5149	5645	4384	3867	4140	3999	5066	5801	4447	2418	3491	3497	944	1351	841	1051	1163	1026	LOC18775166
18786708	2982	2680	2864	3821	3500	2984	3828	3551	3716	3613	2795	3620	3045	2335	2565	3259	2420	3471	3789	4007	4238	3424	3640	3194	2832	3067	2868	3385	2935	3155	4277	4421	3907	3158	3465	2995	3811	4700	4688	7456	7349	6869	8221	10907	8834	8019	8754	8566	LOC18786708
18778148	1174	1192	1057	6991	6059	5790	3983	5133	5485	4036	3296	3585	2189	1779	2248	2469	2048	2924	4529	4908	5488	3900	3997	3370	3133	2927	2752	2902	2555	3060	3743	3973	3032	4012	4566	3460	4938	4994	4563	6887	7318	6704	6626	7086	5920	8231	8387	8417	LOC18778148
18781643	2282	1954	1809	5697	5605	8368	4522	5024	5237	5739	3858	4469	3475	2583	3304	3547	3244	3916	3881	4020	4536	3784	4425	3825	3353	3567	3343	4136	3536	4031	4173	4112	3784	4155	4585	3520	5091	5038	5402	5687	5903	4827	4844	5954	4533	5045	5086	4896	LOC18781643
18772406	6457	5568	5528	4374	4302	4989	4245	4116	4937	5053	3877	4300	4209	3604	3829	4124	3848	4855	3413	3550	3582	3657	4035	3486	3317	3457	3299	4350	3623	4029	4270	4214	3678	4529	4327	3617	3070	4628	4727	5013	4947	4553	5040	5261	5346	4553	4895	4705	LOC18772406
18791391	7077	7475	7817	4060	4487	2076	4354	3191	4544	5851	6535	6519	5784	5462	5924	4705	4156	4777	4344	4017	4676	4355	4477	4524	5373	4399	4673	4533	4319	3814	4021	4004	4020	4380	3430	3411	4197	3462	4073	3719	3020	4058	2105	2200	2309	2059	2336	2101	LOC18791391
18770391	8344	8505	7668	3759	3452	3466	4351	4316	4799	4451	3090	3656	3983	3487	3655	3824	3585	4635	3198	3155	3474	3640	4147	3342	3231	3282	3197	3943	3277	3804	3934	3647	3508	4223	4361	3447	4564	4205	4524	4836	4954	4293	4754	5540	4726	5500	5506	5678	LOC18770391
18787524	797	964	883	2255	1877	2835	2863	3272	4171	918	566	522	1677	2694	2180	2557	2827	2520	1185	1496	1631	4979	3821	4657	2183	2730	2831	9162	8093	8586	3859	6006	3545	3428	5097	4976	7173	6631	7600	5908	6030	4284	9310	13944	6045	8070	9211	7990	LOC18787524
18781698	4013	3799	3672	4277	4268	5897	4092	4159	4336	4838	4072	4165	3727	3302	3708	3921	3626	4330	3809	3663	4425	3661	4321	3770	3747	3922	3524	4455	3926	4272	4025	4222	4103	4125	4735	4202	5178	5111	5280	5184	5140	4535	4248	4993	4495	4849	4786	4674	LOC18781698
18784806	3200	2649	2909	3303	3525	1845	4470	3569	4371	4279	4177	4965	4940	4707	4941	4731	4446	5407	3802	3344	4704	3884	4985	4326	4193	4681	4064	4892	4363	4385	4190	4513	4160	4809	4369	4218	5464	5221	5696	5158	5218	5304	3613	4212	3580	3901	4016	3714	LOC18784806
18780418	2201	2262	1995	3345	3430	4874	3679	3675	4154	3850	3050	3655	2385	1747	2092	2389	2057	2900	4480	4227	5341	3177	3605	2924	3583	3100	2988	3578	2945	3611	3901	3895	3118	4439	4870	3292	4645	4819	4361	8522	9310	6710	8500	9092	8317	6364	6940	6653	LOC18780418
18772286	3010	2043	2454	7013	7086	5292	5749	4264	5559	5859	5336	5557	5527	6209	6519	4966	4632	5194	4836	4322	6182	4563	5005	5617	4311	4667	4519	4936	4050	4094	4081	3860	3717	3476	3227	3392	4875	4720	5248	3726	3156	3075	1244	2814	944	1176	1345	957	LOC18772286
18769488	5683	5554	5343	3276	3591	1958	4116	3245	3958	4459	4383	5028	5057	4365	5186	4564	4500	5208	3586	3167	4055	3811	4447	3930	3930	4021	3950	4194	3599	3819	3977	3978	3836	4584	4181	3904	5321	4835	5080	4637	4615	4490	3993	4125	4205	3997	4232	4370	LOC18769488
18793995	4853	4936	4534	4930	4776	8690	4781	4923	5140	5689	4573	4718	4100	3578	3949	4023	3603	4318	4331	4104	4185	4096	4280	4013	3594	3547	3526	3971	3365	4101	3877	3814	3296	4041	4660	3734	4052	4179	4210	3990	4069	3889	3883	3832	4061	3683	3984	3787	LOC18793995
18770622	1026	1077	935	4937	4483	6211	4668	5654	7243	9513	6113	6925	2642	2426	2780	3432	3358	4876	4102	4291	4887	3711	4558	3292	3219	3103	3069	3513	3206	3622	3623	3359	2856	3459	4375	2797	4404	4490	4270	4892	5605	4384	5718	5610	4406	5541	5842	5699	LOC18770622
18775447	3400	3529	3376	4336	4316	3040	4037	3847	4289	4623	3721	4276	4059	3208	4049	3570	3587	4220	4593	4586	4956	4132	4487	3976	3648	3668	3724	4474	3789	4186	4373	4328	3911	4344	4837	3941	4885	5090	4991	5173	5506	4718	4376	4898	4617	4742	4852	4692	LOC18775447
18776148	3791	3857	3732	4685	4727	4043	3794	3430	4079	4289	3914	4189	3770	3197	3787	3349	3208	3848	4405	4287	5006	4142	4371	3922	3651	3672	3557	4058	3582	3959	4481	4300	3689	4535	4684	3793	5172	4937	5008	5512	5708	5497	4757	5313	4775	4445	4401	4484	LOC18776148
18772053	3449	3376	3201	4135	4521	6401	4289	3712	4181	5351	4692	4837	5456	4934	5714	5442	5059	5534	4404	3936	4202	3798	4002	4077	4120	3969	4139	4903	4341	4461	3794	3983	3773	4690	4441	3782	4442	4068	4656	3951	3752	3628	3102	3598	3607	3085	3393	3283	LOC18772053
18770667	5139	5880	5946	2295	2726	1495	4420	2393	3508	4066	5177	4840	6320	6960	7265	6492	5735	5824	3886	2882	3309	4795	5114	5998	5439	5682	5504	5969	5719	4736	3853	4021	4274	5099	4242	4652	5346	4353	5271	2852	3061	2698	1517	1860	1667	1098	1219	994	LOC18770667
18773387	4273	3988	4138	5672	5034	9131	4831	4635	5348	4341	3933	4535	3840	3507	3822	3729	3200	4337	4284	4676	5325	3835	4040	3327	3141	3061	2956	3372	3129	3545	4335	3984	3309	3446	3445	2853	3865	3251	3405	4000	4205	4139	4705	4770	4587	5854	5944	6387	LOC18773387
18792793	918	574	956	4059	4688	2557	5099	4351	5733	6076	6029	7845	4046	3343	2861	2967	3913	7199	4707	4474	5581	5403	8326	5362	3974	4514	3377	4154	3610	4117	7380	7146	5428	5028	5359	3934	3805	3963	3642	4160	6144	6040	3421	1509	1776	1297	1301	1193	LOC18792793
18778038	1351	1334	1263	3919	3685	2046	4084	3858	4690	4228	3630	4442	4066	3200	3861	3883	3888	4810	3777	3504	3772	3815	4259	3757	3492	3579	3537	4409	3697	4152	4412	4617	3851	4105	4399	3477	4242	4746	4791	5250	5464	4651	5233	6814	5324	7723	7884	7915	LOC18778038
18786976	2586	2409	2312	4253	4271	2916	3525	3397	3734	3313	2902	3422	3145	2478	3284	2981	2797	3391	4530	4637	5207	3972	4377	3386	3078	3037	2963	3343	2829	3411	4352	4269	3725	3775	4255	3262	5018	4969	4956	5819	6111	5478	6836	8194	6689	7390	7999	7860	LOC18786976
18787426	5095	5021	5272	3892	4050	2226	4257	3367	4210	4311	4325	4418	5341	4825	5478	4732	4747	5361	3787	3408	3943	4154	4100	4399	4201	4089	4096	4741	4119	4098	4119	4096	3987	4306	4290	4036	4517	4061	4659	4441	3914	3937	3217	3777	3439	3860	4083	3993	LOC18787426
18779103	7039	7432	7690	3465	3897	2796	4300	3408	4113	4500	4023	4037	5339	5332	5842	4902	4569	5322	4022	3598	3622	4267	4288	4368	3817	3934	3702	5023	4442	4853	4072	3951	3687	4362	3996	3746	3501	4036	4497	3420	3321	3303	3130	2654	3328	3193	3215	3126	LOC18779103
18774748	4190	3778	4066	4797	4450	4611	4193	3915	4506	4422	3663	4212	3926	3145	3744	3583	3278	4057	4194	4565	5307	3817	3977	3573	3406	3260	3116	3647	3327	3665	4233	4272	3526	3989	4155	3120	4553	4223	4380	5022	5384	5232	4883	5334	5098	5338	5281	5400	LOC18774748
18792455	472	382	725	2131	2590	338	3235	3770	4252	2528	2124	2799	3661	3108	2372	3266	3329	6163	3288	3019	3741	4927	6277	4025	3856	3580	3056	4043	3832	5984	8460	8221	5694	6329	6990	5688	4930	6231	5359	7386	7911	8149	5718	2300	3314	4036	3788	4320	LOC18792455
18777220	21	4	25	4091	4269	5129	4389	3406	4658	1595	1671	2374	3228	3681	3864	4430	3245	4903	5792	5850	5353	7860	8090	6878	4402	5166	4441	5312	5509	4392	7652	7973	6014	5105	4118	4025	2221	5175	4183	5168	7062	5163	3708	2462	2150	1889	2084	1477	LOC18777220
18777068	4560	5024	4904	3232	3915	1466	4352	3278	3992	3226	2958	2435	4392	4641	4703	5004	3534	3930	5089	3582	3420	4778	5155	4880	4826	4714	4529	6601	6167	6248	3864	3622	3563	6613	5414	4882	2762	4325	4751	3819	3690	3251	3738	4803	4410	2802	2901	2645	LOC18777068
18790221	4440	4247	4384	3825	3744	3407	4085	3788	4221	4466	3526	4001	3828	3235	3719	3294	3348	4249	3690	3450	4461	3960	4465	3802	3274	3508	3332	4210	3592	3931	4436	4354	3798	4443	4656	3947	5631	4667	4927	5088	4856	4737	4779	5449	5031	4821	5112	5158	LOC18790221
18774247	3381	3444	3260	7284	6751	8914	4065	4343	4585	4495	3794	4245	2749	2442	2922	2765	2209	2905	5862	6220	6146	4230	4183	3668	3229	3029	3016	3302	2796	3408	4000	4037	3319	3220	3357	2938	3177	4008	4007	4903	4600	4804	4802	5302	4493	5606	5740	5382	LOC18774247
18773782	6004	6890	6559	3386	3818	2841	4540	3350	3956	5561	5890	5556	5927	5405	6231	4572	4347	4866	3726	3351	3620	4209	4231	4650	5243	4561	4828	4872	4505	4392	4054	4144	3876	4686	3858	3906	3841	3411	4170	3088	2699	3376	2046	2220	2459	2435	2497	2310	LOC18773782
18780234	5453	5426	5310	4004	4188	2933	4146	3708	4263	4356	3618	4387	4316	3866	4340	3849	3735	4561	4113	3863	4605	3835	4457	4008	3730	3805	3621	4521	3908	4135	4382	4142	3827	4504	4701	4019	4999	4579	4853	4372	4495	4282	3630	3930	4032	3639	3562	3631	LOC18780234
18773189	3423	3264	3291	4520	4357	3753	3783	3794	4252	3722	3088	4122	3540	3049	3633	3438	3222	4201	4186	4732	5507	3672	4118	3539	3374	3369	3426	3914	3371	3677	4372	4344	3701	3855	4066	3307	4989	4356	4641	5238	5357	4860	5102	5892	5256	5660	6154	6130	LOC18773189
18784460	15311	16524	16900	4065	4284	2746	3520	3608	3737	4747	3604	4031	3916	3569	3649	3385	3165	3729	3647	3566	3753	3230	3276	2978	2924	2614	2663	3372	2922	3296	2751	2753	2766	3196	3427	3111	3264	3082	3187	3798	2929	3081	3065	2765	2844	3807	4082	3932	LOC18784460
18768303	4628	5160	5141	3853	4020	3219	4344	3339	4087	4372	4272	4139	4536	4356	4745	4626	4328	4898	4157	3947	4195	4504	4520	5041	4544	4507	4547	4800	4372	4306	4079	4193	3745	4706	4815	4485	4828	4089	4408	3929	3848	3699	2728	3083	2927	3087	3373	3039	LOC18768303
18773794	5824	6065	5828	4211	4428	2904	3761	2959	3629	4302	4224	4487	4594	4296	4851	4060	3778	4262	4294	4087	4932	4190	4355	4430	4614	4275	4302	4960	4379	4316	4177	4379	3904	4605	3957	3802	5011	4122	4822	4058	3852	4094	2681	3131	2933	3018	3205	2986	LOC18773794
18785740	3555	3609	3520	4161	4573	4551	5144	4360	4924	5200	5210	4918	5629	5732	6401	5215	4345	4655	4062	3527	4390	4217	4284	4902	4548	4450	4548	4995	4570	4225	3918	3690	3804	4281	3988	4163	5181	3901	4630	3474	3381	3431	2342	2620	2202	2368	2338	2195	LOC18785740
18776830	4282	4214	4707	4221	4129	4336	4517	4059	4604	5192	5002	4923	4601	4249	4448	4121	3456	4755	4340	4234	5041	4105	4674	4090	4188	3768	3723	4564	3996	4035	4468	4497	3949	3602	3625	3552	4926	3969	3844	4106	3568	4117	3249	3470	3455	3720	3741	3553	LOC18776830
18792801	4600	4404	4210	4057	3980	4303	3911	3440	4087	4909	4886	4985	5017	4214	4969	4313	4345	4846	3960	3660	4050	3843	4041	4157	4056	4185	3914	4436	3920	4020	4325	4211	3781	4659	4029	3439	4423	4357	4774	4110	4319	4201	3518	3758	3909	3264	3604	3482	LOC18792801
18789618	4343	4384	4411	4105	4180	3111	4535	4400	5028	3610	3298	3508	3733	3493	3664	3747	3272	4112	3708	3778	3767	4342	4539	4125	3618	4053	3816	4132	3628	4093	4172	4216	3586	4603	4422	4111	4609	4658	5200	5163	5207	4830	4184	4537	4202	4538	4556	4542	LOC18789618
18767989	3609	4082	3962	4826	4444	4022	3951	3719	4455	4377	4258	4354	4586	4301	4745	3975	3759	4480	4459	4463	4998	4453	4510	4278	4037	3712	3801	4205	3848	3941	4240	4210	3852	4160	4282	3682	4393	3872	4153	4475	4525	4472	3450	3683	3466	4147	4162	4020	LOC18767989
18782435	5462	5769	5794	3692	3972	1889	4677	3637	4744	5080	5108	4810	5625	5541	6156	5334	4852	5071	3677	3352	3378	4107	4178	4591	4737	4195	4764	4811	4299	4355	4091	4076	3890	4741	4196	3840	3931	3818	4797	3390	3059	3311	2328	2314	2505	2481	2692	2482	LOC18782435
18776912	5285	5475	5533	3584	3841	2027	3666	3010	3359	4062	4123	4139	4117	3692	4375	3369	3377	3802	4909	4438	5489	4589	5178	4823	4760	4711	4668	4987	4370	4780	4775	4652	4375	5225	5027	4873	4838	4406	4774	3947	3808	4097	2634	2743	3157	2529	2734	2462	LOC18776912
18792226	2785	2519	2585	3785	3561	4031	3584	3510	3729	4178	3476	4027	3689	3117	3505	3243	3226	4048	4253	4219	4854	4134	4529	3981	3564	3696	3646	4683	3846	4423	4535	4568	4150	4460	4815	3666	5287	4822	5053	5311	5233	5266	4846	5046	4739	4869	5396	5053	LOC18792226
18774213	3318	3114	3091	4805	4591	9807	3841	3874	4204	4600	3661	3996	3283	2594	3197	3068	2760	3209	4058	4162	4728	3882	3648	3270	3012	2958	3016	3458	2975	3286	3981	3716	3671	3381	3863	2868	4457	4272	4482	5452	5340	5008	5232	6049	5258	6023	6339	6502	LOC18774213
18766521	4312	4141	4255	3434	3529	2766	4098	3308	4034	4584	4533	4416	4713	4229	4737	4371	3957	4752	4450	4140	4788	4292	4614	4705	4642	4617	4636	5180	4563	4801	4164	4189	4138	4488	4627	4411	4964	4102	4535	4239	4139	3944	2810	3251	2835	2742	2934	3115	LOC18766521
18787039	4400	3448	3873	4732	4504	4933	4215	4026	4591	3830	3325	3997	4162	3312	3922	3560	3569	4238	4188	4135	4140	4195	4582	3945	3767	4063	4023	4186	3576	3856	4217	4035	3831	4167	4106	3602	2919	4868	4765	5464	5148	5031	4155	4357	4043	4224	4497	4396	LOC18787039
18778221	8076	8117	7749	2677	2828	5391	4024	4011	4415	4088	3016	3096	4525	4070	4194	4930	4264	5255	2271	2194	2788	4297	4728	3629	2814	3300	2859	4258	3811	4556	4510	3713	3976	3670	4090	2885	4088	3259	3488	4338	4188	3598	3824	4625	3785	4952	5166	4646	LOC18778221
18769941	4744	4430	4589	4509	4685	4487	3475	3091	3595	4146	3747	4273	3627	2780	3327	3100	3018	3686	4640	4793	5251	3698	4079	3528	3517	3390	3338	3749	3063	3633	4346	4142	3426	3980	4054	3341	3899	4252	4353	5213	5279	5067	5120	5401	5444	4940	5549	5209	LOC18769941
18771623	5198	4247	5027	3658	3783	893	3971	3277	4049	3939	3857	4780	3769	3316	4098	3717	3276	4040	4521	4255	4935	3715	4471	3647	3610	3592	3577	3872	3722	3622	4110	4439	3639	4043	3808	3444	4628	4158	4325	4881	4587	4376	4174	5114	4637	5894	5929	6377	LOC18771623
18769617	4986	4680	4773	3782	4007	2775	4126	3426	4114	4436	4159	4674	4824	4078	4970	4489	4561	4856	3715	3662	4289	3683	4331	4333	3907	4266	3985	4781	4174	4152	4205	4183	3941	4831	4100	3815	5087	4676	5297	3851	4117	3936	3497	3754	3462	2945	3175	3068	LOC18769617
18778723	4492	4909	6019	4436	4465	3650	5045	3503	4808	5099	5436	6243	4861	5139	5103	4201	3493	4223	4267	3733	3309	4280	4654	4889	5192	4828	4486	4984	4680	4289	3881	4014	4108	4350	3125	4115	1705	3570	4232	3683	3194	3859	2179	2576	2473	3037	2918	2852	LOC18778723
18771860	6104	5891	5803	4541	4642	5424	4780	4447	5046	5374	4638	4774	5377	5119	5449	5215	4643	5396	3760	3386	3479	4323	4387	3961	3783	3660	3696	4427	4010	4276	4106	3684	3566	3975	3813	3280	3419	3450	3579	3511	3377	3340	2468	2753	2513	2510	2761	2512	LOC18771860
18778176	7	15	14	5289	4032	3085	1633	3386	3095	3163	2308	1992	791	583	1201	1385	1037	1841	3783	3872	5620	1911	2681	1986	1874	1556	1841	1711	1500	2305	2286	2738	1409	2064	2082	1164	3089	3179	2668	7822	9322	7977	13391	16609	9598	15762	15932	15737	LOC18778176
18791442	2244	1627	1745	4053	4275	6490	4305	4481	5057	4088	3167	3491	3308	3117	3117	3080	3135	3789	3027	2793	3605	4091	4145	3924	2828	3369	3084	4815	3704	4224	5080	4843	4615	3318	4311	3590	6781	5790	6006	6047	5736	4768	5131	6715	4432	4351	4547	3964	LOC18791442
18772642	4607	4930	5523	3778	4041	2797	4886	3410	4711	5472	5961	5694	5373	5544	5885	4538	3856	4445	4080	3798	4301	4344	4692	4690	5432	4730	4958	4604	4720	4110	4237	4207	4066	4161	3652	3710	4366	3429	4129	3166	2963	3341	1891	2021	2263	2317	2226	2102	LOC18772642
18776044	4792	4477	4457	6087	5427	9838	4337	4682	5272	5006	3647	4197	3299	2473	2891	2787	2357	3320	4736	4985	5389	3955	3981	3310	2933	2838	3058	3202	2601	3269	4151	3889	3300	3461	3800	2694	3193	3765	3578	4435	4519	4213	4424	4414	4393	5557	5424	5325	LOC18776044
18771413	2775	2947	3364	4366	4544	4075	5285	4513	5126	6298	6458	6671	5645	4825	5148	4457	3978	4519	3816	3844	4246	4450	4527	4334	4539	4251	4368	4530	4011	3934	3876	4015	3799	3833	3260	3401	4115	3448	3981	4023	3541	4172	2242	2432	2662	2976	3019	3211	LOC18771413
18777259	5405	5217	4853	3832	4171	3034	4227	3172	4108	4383	4402	4604	6049	6038	6677	5209	4914	5368	5089	4787	5123	4165	4316	4907	4089	4012	4504	4954	4760	4523	3727	3790	3633	4564	3625	3519	3522	3803	4525	2898	2878	2862	2399	2244	2190	2105	2227	2110	LOC18777259
18793494	5224	4749	4610	3578	3561	1996	3771	3153	3936	3708	3151	4079	3732	2965	3595	3371	3256	4086	3685	3873	4539	3700	4516	3700	3389	3625	3316	3832	3348	3846	4314	4098	3671	4598	4479	3622	5188	4836	4675	5081	5133	5072	4776	4890	4977	5244	5560	5353	LOC18793494
18769796	6123	6080	5919	3591	3585	1899	4443	3809	4607	4582	4234	4504	4973	4354	4802	4531	4164	4987	3437	2989	3635	3866	4404	4160	3939	4177	3974	4788	4286	4506	4185	4528	3942	4564	4439	3982	4063	3908	4271	3670	3577	3599	2849	3213	3213	3295	3390	3371	LOC18769796
18769136	7635	8108	8552	5194	4886	3871	4740	4337	5263	4276	3715	4363	3879	3460	3604	3798	3248	4181	4234	4485	4317	3838	4016	3720	3100	3224	3130	3354	3104	3467	4007	3722	3218	3850	4432	3646	2979	3387	3647	3676	3595	3524	3212	3349	3268	3844	4374	4296	LOC18769136
18776112	5972	5798	6290	4237	4012	2313	3617	3360	3936	4498	3636	3913	3735	3205	3398	4661	4046	5150	4943	4620	4409	4565	5309	4038	3343	3286	3111	3719	3382	3990	3705	3011	2820	4326	4822	3420	2167	3302	3325	4120	3783	3574	4315	4138	5287	5475	5206	5243	LOC18776112
18792304	4105	3482	3709	3955	3887	4429	3908	3642	4292	4376	4056	4619	4337	3695	4009	3729	3551	4604	3696	3657	4365	3775	4272	3703	3633	3653	3419	4579	3549	4158	4410	4418	3868	4418	4209	3589	3779	4412	4521	5000	4929	5054	4256	4501	4391	3840	4036	3965	LOC18792304
18778981	3923	3683	3523	4023	3741	3758	3758	3561	4078	4115	3986	4253	4367	3596	4214	4067	3788	4681	3946	4033	4600	3756	4040	3641	3437	3608	3340	3875	3547	3502	4045	4170	3536	4041	4217	3415	4830	4477	4638	5108	5234	5069	4359	4623	4476	4301	4725	4493	LOC18778981
18783057	2390	3200	3130	2810	3378	2396	3187	2537	2881	2918	2811	2086	3753	4923	4185	6150	3983	4641	8293	4470	3953	5301	5453	6100	5255	4723	4031	6897	6541	6924	3399	3765	3366	7681	6445	7574	3566	4410	4679	2853	2475	3097	1596	1821	2566	2585	2366	2491	LOC18783057
18772850	3347	3007	2942	4690	4616	4367	4295	4219	4924	4362	3176	3647	3035	2405	2753	2914	2812	3442	2911	3155	4342	3125	3680	2933	2889	2983	2885	3413	2819	3307	3885	4098	3351	4201	4435	3597	6846	4752	4639	5735	5960	5711	5878	6320	5798	5939	5763	5730	LOC18772850
18788318	5116	4962	5267	3795	3882	3632	3989	3023	4060	4634	4596	4701	5061	4174	4825	4139	3925	4482	4230	3929	4691	4088	4329	4308	4508	4214	4361	4649	4287	4042	4193	3884	3687	4600	3660	3435	4913	3838	4555	3689	3511	4129	2702	3138	3108	2964	3047	2929	LOC18788318
18793506	3847	3519	3768	4012	4127	5371	3767	3398	4143	4184	4031	4058	3731	3431	3778	3565	3045	3898	4982	4636	5681	4044	4306	3697	3734	3722	3487	4030	3679	3891	4338	4309	3764	3814	4142	3394	4326	4506	4321	4610	4738	4523	4250	4470	4050	4163	4253	4152	LOC18793506
18784868	1924	2129	2129	3309	3516	2349	3875	3016	3566	5051	5943	5998	4981	5074	5464	6045	4666	5387	4055	3468	3427	4147	5007	4200	4158	4729	3959	5279	4469	5184	4448	4371	4397	4407	5139	4385	3748	4174	4400	4374	3924	3337	3444	3553	3461	2324	2881	2315	LOC18784868
18784821	240	152	240	1742	1876	668	3431	2275	2570	2959	4487	5417	6693	4630	5351	6750	4851	7803	4482	4560	5126	4659	5732	4004	4960	5135	4446	4903	4096	4321	6487	7126	6333	4550	3631	3353	2687	4135	3305	5390	5992	4897	3968	3171	3707	2536	2962	2522	LOC18784821
18778997	335	188	284	1693	1749	226	2376	1790	2017	3252	4510	4977	5798	3667	5211	5148	4397	6085	4331	4215	5420	3749	4591	3600	3966	4199	3882	4811	3989	3834	5915	6565	5571	4101	3680	2895	4057	4257	3788	6220	7725	5470	4875	5159	5579	4742	5420	4820	LOC18778997
109949467	4241	3397	3891	2478	2407	1340	2837	2291	2761	2727	2895	3476	4117	3235	4139	3289	2952	3498	3642	3418	4016	4605	5635	3772	3713	3402	3355	5603	4877	5345	5096	5167	4470	4698	4606	3211	4933	4301	4852	4773	4373	3812	4020	5303	4709	6494	6368	6526	LOC109949467
18789816	5635	5575	5972	3583	3985	1552	3663	3228	3896	4534	4336	4837	4313	3683	4230	3398	2938	3820	4304	4177	4814	3822	4076	3937	4236	4111	4102	4498	3934	4026	4198	4145	3675	4076	3639	3547	4243	4166	4601	3776	3885	4401	3495	3896	3667	4186	4152	3792	LOC18789816
18792116	3814	3933	3900	6004	5510	8942	3808	4598	4647	5355	3392	4019	2859	1866	1917	2703	2645	3686	3695	4375	4008	3605	3944	2781	2543	2604	2445	3083	2530	3149	3895	3635	2825	4319	5064	3440	3791	4633	4411	5133	5842	4876	4597	4604	5002	5350	5196	5329	LOC18792116
18784994	3149	2991	2960	3913	3860	1962	3877	3533	4193	3941	3205	3876	3587	2700	3204	2689	2662	3227	3601	3913	4307	3847	4717	3759	3527	3595	3556	3997	3467	4077	4174	4054	3850	4444	4533	3510	5447	4544	4918	5909	5234	5102	4953	5816	5234	5352	5461	5648	LOC18784994
18770485	4656	4585	4589	4434	4416	1879	4465	4325	5033	4831	4195	4753	4167	3446	3748	3683	3674	4388	3418	3464	4164	3362	3773	3538	3346	3677	3209	4216	3513	3870	4186	4105	3624	3944	4035	3653	4140	4685	4474	4286	4238	4440	4292	4371	4342	3989	4053	4276	LOC18770485
109946293	313	189	290	2977	3919	2487	3900	3411	3477	5204	4414	3304	5810	6511	6354	6612	5362	4679	2827	2338	2949	3230	2634	3297	3753	3127	3561	6704	4891	5837	3636	4117	4375	2486	3436	3036	4642	6455	6443	5102	4902	3830	6022	8021	3607	3227	3453	2795	LOC109946293
18772639	3331	3905	3216	5581	5244	10249	4994	5125	5075	6694	4174	4516	4362	3715	4000	4676	3423	4277	4051	3820	4293	4095	4263	3340	3012	2745	2643	4272	3473	4129	4090	3624	3654	4349	4380	3047	4120	3539	4002	3360	2925	2972	3221	3424	3249	3230	3004	3057	LOC18772639
18770177	3667	3402	3380	4779	5000	5479	3656	3454	3861	3615	3139	3461	3309	2748	3281	2902	2833	3256	4634	4706	5475	3633	3799	3334	3076	3042	3006	3559	3027	3367	3910	3893	3437	3590	3876	3264	4601	4379	4594	5093	5237	4942	5277	5737	5146	5557	5692	5716	LOC18770177
18781813	2498	2358	2373	2447	2291	3971	5449	5118	6571	5758	3793	4137	4525	4341	4603	4969	4388	5492	2178	2153	2046	4492	5081	4715	4203	4404	4234	5967	5100	5499	5268	5014	5352	4308	4297	4078	3894	4742	5046	3919	3398	3028	2778	4017	2474	2143	2514	2088	LOC18781813
novel.94	6593	5806	6006	2983	3352	2093	4838	2737	4364	3002	3582	3984	4602	5010	4871	4482	3524	5241	4657	3817	4047	5270	6255	5943	5064	5386	5209	4638	5120	4696	5161	4600	4958	4240	3937	4140	2360	3441	3954	2970	2592	2369	1882	1736	1438	1942	2248	2252	-
18770977	5374	6442	6254	3836	3944	3202	4301	3399	4092	4761	5738	5893	5085	5106	5219	4086	3305	4192	4259	4013	4837	4042	4399	4215	4888	3986	4307	4047	4074	3795	3603	3562	3732	3847	3512	3453	5937	3304	4122	3266	2665	3544	2087	2248	2195	2367	2399	2320	LOC18770977
18780669	4107	4123	4161	4342	4172	3747	4089	4164	4675	4317	4003	4321	3593	3081	3640	3453	2938	3748	4268	4360	4876	3681	3955	3506	3412	3588	3340	3793	3197	3510	4111	4053	3767	3435	3809	2912	4093	4162	4299	5021	4895	4659	4671	4904	4340	4551	4670	4721	LOC18780669
18772948	9311	8519	10098	13596	12193	6583	1748	2059	2309	3073	3304	4249	1454	1002	1601	1029	929	1325	7781	8043	8060	1838	1698	1789	1891	1277	1417	1260	1014	1257	3439	3972	2982	1684	1697	1402	3215	5634	4876	4772	5719	4996	5927	4778	5137	3659	4085	3547	LOC18772948
109948609	3004	2882	3420	5391	5012	6144	6287	5644	5545	6343	5341	5874	6155	5865	5540	5070	4401	5208	2626	2615	3338	3611	3668	4175	3208	3739	3212	4213	3625	3540	3368	3633	3701	2656	3464	4385	5401	4232	4052	3270	3142	2971	2062	2837	1906	2553	2460	2330	LOC109948609
18791987	5338	5504	5414	4452	4568	5293	3971	3042	4065	4853	4623	4734	4946	4009	4631	3979	3752	4558	4146	3855	4342	3820	3983	3988	4125	3612	3881	3918	3683	3821	3822	3665	3398	3976	3933	3317	4209	3618	3879	3606	3417	3741	3147	3230	3578	3051	3361	3135	LOC18791987
18785845	1344	1107	1246	7234	7020	4071	3730	4339	4644	3602	2900	3366	1915	1501	1721	1871	1660	2219	5362	6169	6785	4042	3599	3103	2376	2447	2283	2594	2263	2823	4414	4581	3452	3442	4272	3176	5868	5107	4984	5988	6892	5588	6504	6387	5553	5629	5653	5981	LOC18785845
18776769	2590	1999	2479	2802	3108	2101	4637	3226	3951	3974	4463	5060	5743	5502	5560	5042	4495	5803	4253	3554	4361	4671	4932	5237	4306	4642	4199	4801	4492	4102	4871	5072	4831	3606	3452	3846	3731	4709	4990	4180	4276	4316	2947	3036	2483	2035	2322	1936	LOC18776769
18766389	4820	4838	4724	3118	3681	1882	3758	3073	3798	4163	4352	4129	4863	4631	5088	4740	4636	4930	4326	3881	4206	4274	4508	4326	4361	4207	4518	4927	4374	4421	4230	3976	3768	5141	4708	3984	5487	4037	4762	3143	3091	3342	2337	2721	2912	2428	2538	2395	LOC18766389
18778785	5000	4768	4819	5540	5209	6965	3989	4059	4462	4452	3829	3848	3748	3124	3460	3376	3276	3856	3937	4202	4693	3659	3881	3295	2980	2832	2714	3253	2916	3448	4100	3879	3470	3752	4030	3065	4026	3606	3643	4163	4188	3940	4062	4119	4334	4698	4924	4959	LOC18778785
18783042	3978	3992	3673	3496	3950	4076	4614	3288	4401	5108	5314	4967	5717	5171	6151	4682	4620	4817	3905	3307	3450	4257	4227	4830	4557	4207	4830	4945	4511	4214	3655	3809	3736	4570	3872	3921	3691	3745	4687	3308	3133	3511	2074	2477	2337	2216	2301	2090	LOC18783042
18789535	4384	3793	3692	4633	4206	4282	3750	4202	4926	3224	2350	2787	2937	2250	2395	2904	2646	3655	3387	3915	3598	4737	4876	3625	2923	3028	2717	3404	2830	3778	4551	4441	3889	4666	5356	3848	3999	4637	4362	5722	5508	5185	4757	4814	4669	5287	5444	5322	LOC18789535
18781532	4043	3936	4416	3953	4131	3931	3666	3472	3854	4908	4718	5152	3711	3083	3621	3230	2850	3351	3877	3815	4668	3417	3761	3326	3709	3470	3542	3758	3368	3683	4037	4173	3667	3948	3491	3134	3876	4095	4247	4820	4692	5021	4286	4904	4340	5195	4947	4987	LOC18781532
18789674	3881	3833	3430	2979	2871	3927	3967	3193	4097	3807	3584	3891	4711	3964	4732	4681	4664	5100	3128	2998	3514	4077	4600	3914	3554	3665	3463	4897	4139	4475	4280	3809	3545	5013	4656	3882	4493	4314	4634	4438	4346	4302	3448	3546	3463	3916	4192	4023	LOC18789674
18789973	6	6	29	734	799	83	444	1245	1335	205	150	136	1493	982	594	1587	1664	3804	1720	1165	1739	4333	5789	4159	2603	2702	2071	5488	5412	8780	7059	5579	3647	8173	8288	7467	4951	7811	5620	9284	10679	10065	8321	4247	6572	8106	6873	8031	LOC18789973
18783179	26	51	28	466	671	170	939	513	704	1595	1991	633	1940	945	1998	2537	755	814	3506	4505	2183	4630	2690	2917	3918	1529	2877	3104	2959	4538	725	1537	897	13156	12033	4900	811	1283	1846	3378	2017	2820	32249	5313	21368	12031	9254	10258	LOC18783179
18790523	2865	3065	3506	4284	4537	3979	4578	3725	4363	5070	6049	6021	4673	4319	4907	3682	3023	3559	4357	4109	4570	4400	4586	4215	5127	4537	4520	4655	4267	3988	4011	4060	3903	4112	3365	3793	3287	3699	4430	3784	3316	4074	2254	2519	2531	3079	3008	3019	LOC18790523
18771259	4188	4095	3985	3406	3532	2927	3568	3087	3855	3895	3451	4148	3904	3168	3697	3533	3397	4099	4071	3615	4324	3639	4273	3666	3424	3456	3616	4288	3672	3883	4076	4003	3446	4306	4388	3533	4941	4490	4759	4820	4719	4039	4384	4830	4415	4742	4984	4915	LOC18771259
109949257	4921	5110	5358	4323	4817	4271	4518	3388	4049	5252	5790	5355	5411	5434	5831	4478	3620	4108	4497	4572	4736	4014	3966	3859	4468	3559	4159	3949	3603	4070	4036	4057	3667	3939	3221	3377	2584	3315	3647	3380	2792	3342	2335	2565	2489	2189	2564	2355	LOC109949257
18773999	1070	1187	1024	4590	3783	12000	3465	4170	4198	4115	2517	2636	1782	1369	1244	1834	1791	2583	3239	3760	4399	4207	4635	3564	2576	3021	2662	3620	3014	3894	4702	4771	3478	3703	5301	4317	6200	5884	5444	7239	7040	5825	4895	5454	3822	5136	5022	5081	LOC18773999
18769046	3580	3051	3570	3186	3182	1002	3848	3288	3939	3637	3585	4181	4258	3769	4267	3944	3497	4434	4026	3879	4549	3883	4309	3805	3875	3761	3617	4328	4106	4238	3956	4139	3736	4358	3958	3573	3977	4058	4597	4364	4151	3817	3789	4639	4120	6027	5570	5822	LOC18769046
18785787	5511	4913	4947	3648	3767	3400	4089	3503	4219	4503	4078	4378	4490	3995	4388	4207	4216	4935	3275	2981	3556	3730	4092	3978	3736	3920	3919	4510	4053	4172	3957	3904	3624	4237	4329	3903	4740	4156	4390	3870	3677	3608	3121	3299	3465	3247	3402	3167	LOC18785787
18789589	433	1100	660	1616	1706	1616	6385	5060	4813	4468	2740	3462	7692	9952	7435	5654	5318	5391	1746	1648	1701	5352	4636	7092	4343	4339	5195	8679	8095	7502	3650	4986	4504	3977	2547	2827	4629	5695	8080	1898	2332	1852	1556	2680	1369	905	942	889	LOC18789589
18773460	7798	8458	8761	2808	2780	2825	3991	3546	4071	4011	3367	3278	4176	3838	3690	3923	3773	4342	3601	3283	3380	4071	4860	4161	4018	3970	3895	4632	4334	4562	3987	3914	3634	4481	4362	3694	4158	3511	3937	3510	3223	3477	2505	2570	3509	2717	2878	2723	LOC18773460
18793820	5734	5567	5504	3549	3424	3272	4227	3584	4313	4677	3861	4692	4141	3183	3909	3417	3552	4414	2919	2994	3913	3141	3663	3382	3046	3477	3268	4037	3493	3761	3664	3679	3339	4516	3959	3594	5517	4227	4412	4446	4478	4215	4207	4466	4554	3939	3755	3882	LOC18793820
18774924	4562	3793	4231	3577	3514	8672	3906	3502	3893	3365	3387	3647	3579	2823	3209	2819	2538	3421	3588	3541	4265	4013	3825	3793	2956	2922	2691	3285	2904	3193	3402	3552	3091	3351	4440	3806	4877	4264	4238	5456	5804	5068	4977	5821	4730	4698	4837	4964	LOC18774924
18775354	4325	3709	4004	3233	3117	1374	3285	2927	3559	3590	3502	4233	3917	3201	4016	3557	3390	3846	3589	3481	4004	3496	3988	3316	3218	3137	3157	3843	3264	3469	3825	4078	3314	3825	3662	3149	3920	3931	4229	4592	4392	4175	4532	5542	5391	7660	7706	7945	LOC18775354
18786865	3236	2885	2759	2571	2999	2333	4592	3402	4394	4256	4548	5090	5805	4677	5336	5270	4979	5911	3384	3139	3653	4017	4443	4327	4437	4505	4265	4535	4185	4224	4287	4162	4004	4441	4893	4426	4412	3884	4071	3878	3510	3829	2256	2710	2504	2735	3107	2802	LOC18786865
18769762	3829	4249	4606	3638	4072	3405	4449	3418	4269	5151	5795	5648	5545	5286	5247	4140	3668	4225	4100	3691	4168	4206	4254	4751	4791	4288	4368	4500	4278	3909	3765	3759	3696	4094	3512	3949	3870	3581	4070	3261	2935	3551	2038	2295	2223	2470	2536	2393	LOC18769762
18767724	2902	2920	2859	2232	2477	1132	3463	2710	3452	3253	2895	3300	4441	4132	4357	4086	3879	4338	3271	3089	3508	3985	4354	4508	3922	4451	4289	5624	4699	5028	5026	4949	4766	4065	4466	3995	6011	5105	5672	4443	4653	4168	3750	4626	4028	3452	3659	3480	LOC18767724
18792130	8856	9591	9456	5750	5426	5507	4494	4601	4977	4616	3626	4170	3752	3104	3281	3114	3237	3768	3778	3742	3779	3636	3785	3638	2919	3132	2861	2893	2563	3119	3557	3336	3064	3483	4039	3848	3366	3779	3692	3502	3369	3412	2186	1806	2487	3112	3209	3059	LOC18792130
18786212	3751	3590	3603	3196	3300	3326	4308	3447	4169	4668	4678	4806	5145	4589	5370	4949	4732	5559	3397	3240	3753	4157	4312	4396	4154	3993	4015	4704	4090	4226	3961	3967	3659	4505	4081	3732	4120	3821	4173	3435	3387	3560	2799	2815	2874	2972	2869	2858	LOC18786212
18767127	0	0	0	2201	2337	1634	4812	2059	2904	2949	3012	3308	7530	12133	14530	7487	6822	3950	1867	1635	1574	5457	6846	12752	8771	9278	9992	7175	6678	4646	2150	1961	2936	4429	3150	4105	3225	3025	3391	1450	1152	2187	262	588	83	207	352	196	LOC18767127
18792589	4970	5008	5426	3000	3252	1046	3943	3165	3765	4222	4058	4326	4580	4405	5046	4032	3920	4559	3509	3251	3939	3757	4228	4049	4220	4019	4075	4732	4125	4411	4018	4078	3697	4394	4023	3916	4885	4020	4352	3697	3383	3539	2949	3322	3244	3635	3522	3359	LOC18792589
18784567	3905	3611	3584	3516	3414	2945	3735	3200	3906	4223	3545	3970	4102	3345	3911	3737	3849	4553	3423	3547	3904	3558	3904	3403	3223	3408	3168	3997	3305	3668	3945	3674	3406	4111	4267	3352	4739	4608	4707	4857	4878	4630	4820	4983	4963	4381	4489	4511	LOC18784567
18776193	2759	2686	2435	3854	3825	5462	4333	3741	4279	4066	3339	3898	3698	2931	3586	4405	4219	4771	4092	4349	4959	4173	4900	3874	3345	3791	3545	4523	4070	4315	4567	4098	4306	3973	4479	3624	5733	4481	4474	3774	3850	3601	2769	3561	2854	3520	3472	3350	LOC18776193
18768217	4388	5361	4798	4189	3639	3338	5503	5136	6530	5124	3594	3727	3019	2793	2787	2651	2272	3529	3240	3958	4710	4308	4579	3930	2634	3112	2698	2630	2401	2996	3447	2981	2376	3698	5262	3774	5231	3697	3259	4539	4592	4814	4546	3291	3312	5277	5467	5502	LOC18768217
18789821	5614	5521	5529	3679	3580	2150	3991	3499	4153	4551	4017	3993	4242	4171	4188	4000	3635	4469	3985	3798	4401	4134	4577	4118	3627	3702	3623	3877	3488	3708	4239	3658	3569	3982	4436	3612	3912	3825	4031	4030	3647	3849	3183	3168	3396	3110	3477	3210	LOC18789821
18792890	4973	4507	4745	4228	4426	2164	3821	3210	4110	4062	3779	4088	4026	3705	4314	3696	3586	4201	4290	4393	4281	3871	4320	3937	3708	3637	3485	3840	3378	3880	3988	3874	3410	4156	3910	3602	3743	3948	4208	3612	4097	3905	3436	3479	3727	4275	4034	4092	LOC18792890
18787046	4422	5021	5370	3601	4128	4186	4256	3125	3967	5280	5406	5161	5335	5083	5469	4192	3704	4070	3925	3331	4232	4054	4201	4419	4581	4099	4456	4406	4316	3859	3868	3593	3568	4170	3560	3553	4395	3469	3848	3146	2768	3360	1810	2066	2134	2576	2380	2213	LOC18787046
18790306	3805	4176	4038	4301	4420	5004	4380	3561	4268	5355	5478	4726	5513	5256	5585	4568	4044	4664	3915	4109	4041	4261	4051	4224	4543	3762	4147	4732	4369	4090	3783	3692	3709	3682	3501	3192	4252	3058	3485	2968	2653	2914	1985	2158	2421	2534	2498	2230	LOC18790306
18777969	4020	3438	4397	5192	6810	4920	5716	6850	7454	6071	5153	6007	4823	3959	3645	2467	2692	3826	4503	4344	3936	4395	5337	3339	3757	3484	3011	2733	2361	3723	5699	4843	4199	4791	5517	3740	1532	3174	2438	3531	3269	3717	1823	929	1780	1636	1475	1580	LOC18777969
18789932	1369	1417	1334	4694	4533	8052	4643	4080	5314	3635	2825	3563	3180	3053	3331	3887	3217	4178	5006	4911	4979	3899	4655	4160	3479	4025	3549	3683	3449	3185	3766	3772	3240	3640	3569	3373	3205	4510	4450	3790	4601	3456	4845	5175	3977	4533	4267	4231	LOC18789932
18782406	5910	6002	5797	3633	3974	4230	4227	3828	4419	4525	4324	4664	4367	4034	4235	4152	3713	4847	3707	3781	3624	3895	4402	3916	3677	3772	3723	4060	3636	3744	3958	3808	3541	3848	3933	3416	3285	3733	4084	3288	3401	3172	2856	2870	2975	2871	2922	2803	LOC18782406
18769030	3855	4310	4322	3954	4038	3571	4457	3520	4379	4843	4547	4401	5404	5118	5962	5159	4680	5007	3646	3371	4048	3727	3965	4111	3840	3864	3928	4481	3897	4003	3439	3451	3409	3953	3808	3529	4311	3610	4138	3374	3206	3153	2485	2700	2535	2658	2732	2572	LOC18769030
18789502	6594	6495	7170	4017	3440	5093	3037	3230	3585	3177	2548	2744	2647	2019	2059	2833	2522	3376	3984	3791	4202	3495	3546	2929	2247	2283	2100	3400	2843	3587	3644	3447	2856	4224	4775	3175	3576	3885	3639	4257	4673	4059	5193	5172	5913	6457	6477	6914	LOC18789502
18793417	3453	3453	3395	5040	4935	5899	4132	4016	4426	4527	3879	4084	3837	3401	3814	3531	3044	3304	4293	4241	4963	4029	4141	3815	3547	3569	3479	3798	3649	3823	3945	3687	3447	3603	3736	3140	4440	4011	4329	4264	3970	3761	3478	3945	3379	3451	3696	3514	LOC18793417
18767355	3637	2911	3440	3119	3065	798	3241	2813	3481	3437	3325	3800	4012	3037	3928	3560	3443	4021	3773	3968	4145	3635	4383	3534	3409	3520	3470	4413	3419	3872	3955	4187	3446	4236	4027	3402	4410	4247	4570	4939	4502	4345	3836	4942	4881	6222	6262	6246	LOC18767355
18774750	5039	4788	5010	3761	3892	2954	4000	3176	3850	4563	4332	4524	4808	4203	4835	4137	4019	4723	3689	3651	4282	3558	3973	4181	4379	3802	3959	4456	3812	3989	3873	4129	3616	4510	3639	3509	3685	3736	4304	3571	3457	3704	2618	2905	2946	2825	2935	2915	LOC18774750
18774729	104	170	135	2461	3084	1204	4858	2799	4215	4719	5725	5458	6842	6072	6453	5151	4714	5821	3872	3727	3772	5100	5700	5055	5878	5253	5240	5299	5005	4794	4568	4561	4351	4400	4173	3663	3030	3192	3083	4180	4293	4568	1988	1680	2303	1426	1534	1324	LOC18774729
18783128	5095	5265	5135	3760	3849	4524	4120	3672	4214	4310	3707	4204	4397	4115	4845	3979	4000	4577	3519	3517	3410	3851	4101	4270	3306	3676	3581	4618	4082	3976	3566	3628	3419	3979	3986	3518	3700	4164	4597	3700	3570	3600	3121	3395	3119	2587	2942	2679	LOC18783128
18772746	5164	5323	5342	3218	3582	2208	3476	2982	3870	3710	3326	3866	3941	3530	3786	3540	3503	4392	3953	3551	4257	3747	3999	3632	3569	3674	3304	4047	3421	3958	3951	4165	3596	4047	4313	3459	4266	4172	4339	4198	4100	4009	3720	3946	3870	4133	4287	4066	LOC18772746
18771406	3060	3208	3233	4800	4666	4287	3188	3142	3569	3391	2842	3343	2602	2153	2504	2242	2195	2770	4411	4782	5400	3088	3186	2929	2620	2525	2560	3057	2373	2738	3370	3537	2891	3052	3856	2873	5201	4392	4161	5374	5435	4951	5775	6637	5704	7531	7280	7495	LOC18771406
18780282	1532	2003	1443	2478	2704	2259	4561	3333	4358	3618	2914	2785	4514	5691	6212	4661	4373	3916	2362	2451	2867	3572	3905	5210	4985	4697	5270	6639	5526	4834	3357	3985	3731	4267	3410	4268	6155	5454	7151	3761	4120	3281	3287	4350	2612	2313	2457	2570	LOC18780282
18769804	5121	4413	4924	2428	2769	2483	5385	3871	5118	3048	2909	2858	4643	4309	4530	4126	4177	5407	3648	3308	3501	4867	5046	5882	3506	4718	3992	5072	4272	4314	3951	3951	3982	3806	5342	5456	4659	4304	4491	3451	3414	3301	1747	1934	1522	2031	2002	1999	LOC18769804
18789789	1637	1507	1504	4967	4694	5515	3638	3673	4021	3889	3293	3592	2745	2581	2863	2268	2095	2419	5697	5757	6788	4268	4194	4150	2705	3570	3144	3628	3131	3585	3634	3551	3422	3471	4584	3661	5133	4884	4907	4889	5265	4682	4070	4467	3753	4699	4740	4644	LOC18789789
18784738	4990	4917	4796	4655	4598	5344	4239	4065	4242	4638	3962	4011	3799	3700	3663	3532	2925	3675	4368	3940	4390	4065	4130	4035	3580	3435	3367	4033	3774	4293	4067	3915	3569	3964	3946	3287	3955	3656	3744	3589	3518	3403	2933	3134	3066	2977	3039	2958	LOC18784738
18775399	1965	1713	1806	3881	4090	3544	3516	3570	3754	3729	3325	3598	3353	2528	3175	3370	2782	3515	3915	4042	4279	3664	3854	3253	3068	3036	2996	3197	2864	3378	3934	4028	3354	3784	4109	3307	3433	4356	4296	5565	5692	5237	4924	5936	5299	6530	6467	6643	LOC18775399
18783162	4585	5602	6968	3518	5273	2128	3345	1301	3045	1919	2183	1516	2707	2834	4441	3216	2774	2656	4917	2311	2719	1121	1362	1720	1895	2001	2202	5700	4502	5813	2097	2644	2284	2178	1896	2541	4126	4186	5751	3561	5144	2621	12646	10193	9090	5904	6870	5637	LOC18783162
18776350	2450	2902	2595	4787	6235	2340	5089	2656	4512	9105	13471	12223	6743	4747	7978	3487	3209	2567	4437	3720	3784	4946	3865	5131	5479	4239	4718	2504	2589	1834	1225	1538	1676	2311	2857	3202	2039	2245	2338	4006	2123	4800	1314	984	1403	2258	2507	2470	LOC18776350
18783739	5216	5455	5902	3367	3471	3144	4046	3377	3999	3960	3319	3615	4252	4166	4463	4587	4130	4536	3725	3431	3713	3717	3844	3517	3231	3220	3247	4572	4089	4517	3526	3687	3388	3824	4003	3457	4187	4211	4544	3499	3643	3186	3738	3524	3215	3301	3485	3263	LOC18783739
18767415	2363	2475	2439	3412	3594	4081	3785	3052	3669	3795	3734	3740	4477	4065	4446	3553	3520	3912	3738	3459	4299	4230	4386	4533	4133	4043	3992	5048	4158	4303	4035	3994	3877	3897	3995	3787	5481	4419	4455	4027	4255	3942	3295	4154	3466	3303	3465	3183	LOC18767415
18788919	15318	17736	17221	3229	2961	3228	1897	1912	2081	2389	1962	2223	2138	1827	2240	2054	1702	2006	2356	3028	2632	2835	2677	2576	1844	1869	1899	2310	1952	2223	2066	2326	2008	2361	3075	2684	4543	3445	3396	3428	3421	3043	5133	5797	6134	6672	6652	6809	LOC18788919
18779028	2714	2319	2281	4819	4733	4457	4298	3940	4432	4568	4254	4610	4490	3848	4390	4096	4028	4625	3929	3634	4682	3855	4282	4086	3539	3773	3922	4610	3896	3865	4394	4040	3823	4203	3875	3519	5192	4653	4939	3694	3178	3734	2227	3014	2419	2456	2542	2352	LOC18779028
18784995	1547	3080	1997	1542	1731	998	6738	4797	4496	2861	2192	2289	8506	11547	9059	6104	5197	5253	2493	2027	3164	5186	4373	7960	3714	3770	4900	8718	8223	6730	3148	4229	4381	2608	2091	3297	5803	5625	7178	1068	1113	1212	326	1197	122	155	210	163	LOC18784995
18779340	2654	2737	2667	4383	4131	5202	4099	4143	4208	4043	3387	3758	4218	3855	4109	4300	3700	3979	3586	3529	3561	3967	3987	3890	3516	3638	3349	4365	3661	4085	3863	3852	3918	3527	3637	3395	3022	4241	4588	4665	4552	4272	3607	4492	3495	3723	3907	3653	LOC18779340
18791649	5997	6029	5521	4406	4341	6667	5100	5229	5723	5046	3901	4313	4451	3832	3974	4142	3843	4468	3500	3194	3659	3744	3712	3367	3367	3425	3328	3936	3349	3972	4191	3601	3623	3722	4144	3199	3426	3443	3648	3156	2517	2587	1794	2374	2290	2507	2723	2534	LOC18791649
18787726	4797	4341	4381	3614	3871	3533	4102	3690	4277	4497	3957	4299	4034	3319	3809	3454	3498	4304	3162	3237	4198	3426	3932	3321	3265	3340	3391	4087	3467	3918	4029	4029	3491	4091	3924	3444	4741	3809	4122	3853	3968	3758	3779	3947	3845	3807	3889	3781	LOC18787726
18778228	4328	4170	4424	4431	4466	3697	4620	4325	4678	5580	4586	5331	5002	4024	4564	3951	3914	4778	3833	3732	4747	3783	4163	3769	3363	3858	3351	4099	3577	3870	3820	3551	3339	3612	3585	3208	4619	3639	3762	3373	3183	3444	2293	2439	2658	2556	2494	2239	LOC18778228
18789001	3521	3621	3938	2984	3408	1643	3706	2723	3629	4809	5584	5263	5428	5004	5510	4432	3943	4549	3886	3523	3734	4220	4031	4215	4881	4197	4482	4411	4143	3883	3868	3864	3703	4021	3471	3389	3761	3358	4175	3515	3280	4010	2477	2533	2749	3048	3102	2905	LOC18789001
18779085	5305	5525	5346	3762	3793	3123	3979	3009	3809	4107	4083	4340	4413	3805	4449	3844	3616	4057	3972	3715	4256	3825	3842	3726	3821	3398	3716	4123	3491	3685	3927	3835	3424	3940	3704	3224	4040	3326	3881	3907	3835	4083	3113	3433	3481	2850	3268	3283	LOC18779085
18786695	5972	6664	6745	2727	2714	3483	5181	5450	5448	4816	3569	3210	5630	5465	4973	4672	4323	5529	2678	2183	2386	5073	5459	4731	3256	3715	3213	4356	4031	4823	4220	3176	3817	4398	4824	3656	3472	2874	3138	2182	1821	1945	1718	1770	1703	2276	2436	2427	LOC18786695
18787846	6857	6112	5873	3451	3485	3685	3806	2840	3848	3329	2957	3111	3015	3050	3533	3030	2417	2796	3644	3265	3553	3430	3822	4703	3585	3454	3293	5560	5527	4361	5359	5558	6288	2784	3580	4541	6025	8297	8747	2500	2636	2120	1743	4038	1618	974	1033	962	LOC18787846
18793801	4025	3839	5170	3819	4227	2711	4792	3783	4384	4814	4968	5479	4903	5004	4958	4074	3200	4429	4404	4166	3503	4440	4301	4484	4848	4067	4088	4094	3871	3802	3905	3818	3729	3972	2911	3654	1504	3478	3847	3516	2863	3706	2140	2319	2337	2676	2712	2449	LOC18793801
18787712	2599	2301	2500	2881	3120	2710	3515	3017	3600	3210	3182	3791	3855	3212	3683	3501	3194	3969	3656	3316	3329	3759	4142	3837	3749	3748	3641	4083	3533	3810	3605	3618	3315	3969	4160	4132	3900	4427	4689	5002	4867	4276	3923	5040	4383	5944	6058	6256	LOC18787712
18771066	3161	3196	3351	2431	2791	1553	4068	3004	3741	4149	4864	4774	5283	4438	5101	4768	4484	5227	3769	3274	3523	4128	4440	4631	4204	4428	4207	4420	3961	3812	4044	3869	3615	4196	4290	4167	4896	4035	4232	3970	3980	3922	2683	2421	2952	2489	2537	2409	LOC18771066
18772462	208	160	200	694	819	228	3665	3328	3116	3245	2858	2028	5298	4455	4346	7016	5592	6316	1655	1444	1416	3493	3758	3038	5034	4132	4119	4430	3711	4916	4074	4061	3391	4498	5448	4686	3605	4179	4037	6993	5192	6900	3773	4980	4952	5576	6550	6143	LOC18772462
18781024	3742	3839	3801	4265	3948	7087	3972	3521	4172	4504	3945	4066	4222	3491	4034	3535	3279	4110	3533	3691	3811	3604	3792	3508	3443	3356	3121	3707	3172	3598	3963	3904	3415	3447	3033	2723	2881	3216	3542	3768	4033	4126	3927	4083	4348	4535	4428	4434	LOC18781024
18793822	2638	3064	2987	2462	3075	920	5437	2771	4645	4168	5066	4528	6375	6068	6826	5564	4973	5055	3780	3356	3532	4367	4482	5839	5891	5492	5870	5262	5446	4207	3858	3856	4152	4607	3816	4523	4088	3445	4350	2197	2072	2232	1078	1362	1024	763	941	800	LOC18793822
18774728	4559	4748	5331	4082	4176	2403	4215	3382	4342	4745	5216	5410	4723	4541	4722	3658	3251	3904	4206	3908	3539	4168	4173	4424	5124	4321	4359	4384	3996	3844	3683	3520	3567	4380	3427	3862	2510	3317	3992	3392	2927	3571	1797	2046	2031	2364	2453	2550	LOC18774728
18775568	3791	3240	3405	3230	3367	1624	3367	2678	3367	3817	3545	4172	3999	3298	3861	3558	3542	4317	3641	3392	4261	3515	4227	3607	3354	3699	3505	4358	3581	3899	4033	3903	3695	3982	3906	3605	5446	4659	4955	4547	4703	4496	4085	4389	4233	3767	3778	3786	LOC18775568
18783407	4690	4823	4935	3611	3914	2294	3852	2870	3759	4600	4995	5010	4791	4234	4750	3961	3294	3907	4057	3710	4067	3880	3862	4143	4526	3925	4260	4041	3840	3767	3842	3723	3414	3968	3245	3310	2720	3245	3804	3757	3235	4063	2729	2865	3032	3219	3220	3262	LOC18783407
18779511	3189	3056	3174	6647	6100	7815	3936	4524	5057	4539	3664	4166	3272	2202	2759	3063	2772	3519	3842	3853	4296	3134	3403	2950	2648	2567	2576	3122	2486	2976	3286	3474	2914	3404	3587	3057	2815	3367	3641	4121	4129	3792	4261	4706	4417	5505	5752	5424	LOC18779511
18790522	3566	3750	3327	4137	4288	4856	4268	3575	4311	5076	5359	5056	5106	4380	4969	3736	3561	4179	4050	3611	3183	4276	3761	4313	4187	3763	4234	4279	3849	3911	3556	3331	3433	3724	3452	3255	2921	3310	3896	3748	3258	3907	2459	2575	3048	2921	2570	2624	LOC18790522
18768581	3824	3298	3346	3587	3638	1772	3760	3163	3582	3549	3642	3687	4565	4583	4560	4397	3886	4965	3241	3002	3668	4317	4970	4664	3892	4444	4101	5406	4451	5138	5392	5281	4925	3334	3232	2863	5038	4709	4858	4109	3914	3492	2358	3100	2252	1568	1796	1536	LOC18768581
18786950	5010	5188	5791	3353	3810	3141	3978	2923	3737	4566	4875	4802	4714	4534	4599	3881	3266	4091	3951	4001	4112	4303	4331	4675	4753	4253	4302	4288	3826	4012	3910	3926	3584	4303	3666	3780	2951	3380	3827	3345	3107	3451	2135	2042	2159	2042	2002	1942	LOC18786950
18791361	3719	3984	4373	1827	2123	1195	3564	2473	2989	2994	2974	2604	4170	4050	4312	4092	3478	3716	2884	2139	2575	3432	3897	4771	4544	4414	4418	5829	5050	5194	3458	3772	3765	4241	4669	4883	5880	4845	5012	4544	4112	4120	3743	4300	3488	3091	3578	3214	LOC18791361
18774612	12068	13819	12928	6913	6458	7816	3641	4515	4563	4053	2865	3334	2014	1510	1668	1676	1514	2057	2753	2998	2960	2655	2498	2197	1587	1829	1773	1753	1500	2127	2559	2261	2228	1532	2034	1995	2569	3712	3493	3943	3831	3455	5774	4484	4750	4661	4787	4349	LOC18774612
18792321	7368	6248	6770	12353	8450	12245	2317	4523	5995	2221	1337	1569	386	295	268	567	476	893	2306	3124	2580	1964	1959	1313	816	910	965	2296	2177	1643	1775	2981	1670	2081	2354	2013	2500	3600	3831	4304	4552	3180	6325	12358	6501	8290	9073	8701	LOC18792321
18785382	4524	4147	3977	3478	3599	3553	4165	3764	4419	4435	3670	4153	4107	3262	3909	3608	3503	4316	3180	3088	3758	3362	3902	3507	3293	3779	3375	3974	3454	3779	4157	4034	3573	3917	3944	3377	4681	4133	4288	4233	4353	3943	3509	4034	3644	3165	3136	3215	LOC18785382
18784971	3566	3607	3369	6535	5835	7867	5367	5628	5763	6533	4319	5163	3651	2603	2993	3254	2722	4082	4207	4659	5455	3847	3985	2884	2430	2706	2304	2529	2250	3076	3738	3486	3045	2620	3037	2132	3664	3310	3225	3479	3655	3343	3382	3988	3566	3138	3243	3084	LOC18784971
18777675	4052	4033	4329	4717	4333	2154	4272	3861	4209	4470	3876	4315	4312	4200	4107	3874	3168	3928	4519	4232	4723	4060	4154	4096	3830	3606	3392	3941	3831	3944	3554	3548	3322	4294	4055	3873	3794	3751	4049	3604	3259	3377	2701	2776	2744	3074	2932	2890	LOC18777675
18773843	5533	5498	5704	3980	4107	1897	3117	3000	3476	3532	2993	3513	3174	2610	3080	2996	2740	3414	3850	3879	4563	3260	3656	3108	2966	2971	2834	3533	3002	3307	3503	3451	2881	3671	4001	3137	5197	4173	4347	4492	4450	4181	4233	4857	4454	5279	5265	5087	LOC18773843
18774284	4800	4956	4932	3629	4019	1864	4278	3058	4154	4825	5465	5423	5127	4469	5058	3889	3311	3804	4174	3738	3942	4328	3971	4386	4983	4229	4516	4251	4133	4031	3728	3786	3859	4040	3293	3405	2724	3216	3872	3189	2740	3341	1893	2136	2202	1961	2213	2236	LOC18774284
18792393	5086	4727	5051	4225	3850	2534	3814	3534	4197	4301	3613	4391	3419	2887	3129	2971	2910	3529	3091	3330	4148	2783	3741	3066	3100	3273	2871	3971	3179	3378	3641	3524	3232	3753	3478	3425	4280	4345	4144	4265	4032	4175	4573	4733	4709	4263	4265	4514	LOC18792393
18771977	4719	4760	5004	3291	4547	3660	3148	2344	2841	4513	4971	5589	3719	3298	4139	2987	2857	2885	10447	7283	12497	2971	2975	3241	3476	3366	4230	4233	3699	3583	3053	2998	2917	3503	2983	2633	3194	3050	3641	3017	2924	2867	2269	2528	2372	2079	2103	1940	LOC18771977
18791216	4765	4457	4474	3497	3752	6500	3825	3501	4053	3927	3692	4175	4178	4002	4261	3978	3724	4439	3936	3896	4065	3830	4076	3911	3551	3658	3705	4025	3599	3672	3594	3688	3359	4030	3722	3479	3152	3460	3867	3532	3484	3481	2832	2905	2733	2937	2965	2871	LOC18791216
18788682	4339	4118	4016	5051	4824	4776	4488	4761	5181	4494	3344	4134	3198	2674	2971	3402	3052	4287	3421	3830	4086	3364	3900	3070	2871	3082	2692	3084	2758	3232	3948	3562	3262	3327	3826	2864	3929	3982	3887	4078	4300	3772	4023	3999	3762	4038	4117	4011	LOC18788682
18791072	5914	6185	5607	4183	4106	1991	3774	3671	4244	3992	3178	3389	3370	2952	3294	3154	3016	3520	3212	3267	3492	3297	3370	3275	3137	2925	3057	3417	2870	3111	3562	3423	3004	3560	3926	3153	3807	3733	3975	4055	4132	4087	4055	4696	4345	5189	5139	5345	LOC18791072
18774550	2772	4289	3489	2019	2367	1278	4772	3058	3240	2751	2889	3037	6930	8644	7520	4909	4709	4740	2463	2081	2430	4793	4015	6581	3589	3379	4946	8620	7865	6759	3182	3825	4526	3135	2010	2561	4682	5586	8166	2133	1963	2112	1127	2132	769	736	913	664	LOC18774550
18777514	2645	2504	2424	3053	3285	3135	4054	3478	3805	4104	3688	3852	5369	5077	5649	5578	5120	6119	3038	2925	3407	3700	4128	4003	3312	3784	3692	4765	4085	3845	3617	3484	3691	3678	3398	3139	4420	3992	4468	3890	3490	3608	2554	3938	2667	3085	3306	3013	LOC18777514
18767037	3590	3492	3449	3517	3710	3817	4115	3907	4548	4461	3582	3972	4004	3466	4005	3963	3836	4464	3543	3661	3740	3478	4194	3701	3338	3572	3351	3957	3382	3780	3810	3486	3423	3715	4109	3816	3960	4299	4268	4190	3894	3944	3210	3787	3350	3357	3537	3256	LOC18767037
18778250	2665	2684	2698	3235	3396	1984	4135	3001	3710	3810	3798	4027	4640	4401	4719	4250	3722	4733	3878	3841	4563	3982	4378	4081	4091	4033	3672	4373	3948	3863	3930	4085	3960	3987	3756	3860	5046	4019	4398	4043	4246	3765	3006	3150	2767	2896	2837	2809	LOC18778250
18783067	4399	3824	3970	3983	3885	4970	3929	3676	4238	4402	3788	3907	4125	3633	4026	3942	3673	4543	3585	3272	3396	3549	3829	3407	2989	2960	2928	3732	3290	3668	3730	3526	3179	3217	3590	2900	2844	3863	3645	4122	3992	3841	3598	4088	4118	4227	4411	4388	LOC18783067
18772804	3133	2799	2730	3115	3014	3548	4795	4075	5038	3988	3529	3730	5363	5346	5304	5417	5523	5848	3365	2924	3437	4184	4341	4422	3205	4017	4072	4824	4143	4457	3874	3387	3781	3258	3568	3235	3584	3788	3953	3424	2980	3044	1998	2688	1549	2919	3087	2824	LOC18772804
18789763	1500	1287	1362	7404	6464	6931	4678	5271	5819	4765	3563	4731	2101	1372	1711	2207	1821	3253	4540	5002	5843	3537	3786	2741	2462	2469	2409	2592	2236	2782	3817	3641	2718	3541	4139	2946	3869	3411	3091	4731	5060	4633	4205	4832	4026	4982	5255	5083	LOC18789763
18788738	332	296	334	5649	4626	8570	5394	5995	7545	4542	3536	4163	2138	1634	2228	2360	1787	3105	4255	5014	4879	4280	4530	4169	2669	3209	2877	2413	2065	2372	2616	2876	2072	2826	3626	2636	3845	4060	3888	4623	4785	4794	6567	5068	4255	4992	5143	4940	LOC18788738
18789176	4773	4804	4655	3367	3413	2552	3738	3289	3908	4238	3881	4267	4340	3666	4081	3833	3725	4633	3659	3563	3758	3732	4127	3874	3959	3862	3718	4073	3655	3873	3982	3813	3596	4096	3999	3367	3830	3881	4081	3618	3575	3534	2874	2948	3051	2879	3120	3079	LOC18789176
18787206	2233	2192	2331	4648	4411	3920	3991	3565	4416	4036	3540	4328	3143	2820	3345	2730	2395	3074	4130	4446	4770	3546	4042	3424	3669	3577	3396	3504	3195	3415	4039	4086	3358	3647	3431	3011	3888	3539	3698	4578	4785	4393	4063	4297	3966	4825	5120	5109	LOC18787206
18784256	362	336	313	451	497	673	3013	2023	2915	852	751	695	3283	3331	3237	4213	3886	3894	1064	1305	1070	3714	3349	3705	2831	4189	3759	3635	3194	3631	2743	2403	2659	4784	6994	6603	5583	3888	4948	5261	3986	4428	2726	3396	3404	15000	15145	15878	LOC18784256
18781729	1062	637	951	2099	2439	1045	3789	2926	3411	3714	4273	4570	5970	4497	4615	4799	4743	6206	3302	3026	3354	4776	5025	4549	4364	4547	4400	4390	3960	4315	5715	5201	4613	3848	4280	3640	4450	4555	4453	4721	4605	4593	2435	1992	2776	2134	2068	2077	LOC18781729
18769809	4178	4767	5165	2983	3365	1349	4183	2578	3842	4503	5470	5056	5451	5100	5545	4328	3649	4144	3985	3546	4036	3871	4065	4639	5439	4352	4793	4491	4426	3796	3778	3806	3824	4071	2991	3514	3574	3035	4078	2733	2560	3322	1740	1804	1942	2046	1970	1984	LOC18769809
18771978	6023	5597	5580	5087	4101	6408	4084	4880	5528	3296	2307	2331	2485	2089	2276	2228	1911	2621	2747	3270	3282	3889	4074	3244	2513	2923	2530	3320	2791	3470	4175	3655	3590	3489	4059	3166	3518	4327	4041	4493	5017	4177	3883	3847	3333	4683	4546	4668	LOC18771978
18781712	4427	4972	4985	4018	4359	3280	4651	3530	4240	5686	6242	6222	5165	4643	4768	3987	3345	3937	4308	3777	3831	3863	3961	4063	4724	3843	4300	3920	3716	3699	3698	3627	3558	3574	3161	3141	2837	3064	3383	2843	2421	3068	1689	1681	1990	1711	1842	1646	LOC18781712
18771467	5932	5811	5677	3451	3393	2918	3553	3108	4002	3958	3955	4189	4223	3556	4323	3966	3822	4688	3882	3507	3761	3513	3944	3708	3540	3695	3616	4231	3494	3758	3948	3681	3457	4273	3831	3279	3314	3738	4131	3360	3619	3322	2780	2746	2851	2547	2561	2584	LOC18771467
18772174	4498	4521	4779	4527	4473	4446	4503	3818	4377	4997	4335	4797	4341	3609	4245	3675	3416	4267	3923	4032	4662	3478	3751	3557	3291	3281	3216	3888	3594	3647	3661	3757	3460	3400	3708	3280	3726	3693	3860	3330	3245	3102	2564	2652	2545	2394	2448	2410	LOC18772174
18767641	4121	3725	3713	2481	2920	1321	4082	2923	3539	3807	4192	4250	5068	4592	5007	4260	4238	4687	3438	3046	3446	4394	4516	4278	3962	4358	4118	4972	4344	4645	4497	4564	4071	3730	3959	3739	3488	4873	4849	3795	3789	4058	2116	2198	2335	1323	1536	1390	LOC18767641
18767394	4006	3660	3791	4687	4548	3769	4012	3986	4520	4187	3260	3880	3455	2870	3206	3034	2962	3863	3644	3686	3908	3504	3810	3139	2776	3100	2873	3434	2941	3512	4002	3838	3401	3683	3627	3070	3414	4193	4239	4259	4527	4098	4134	4504	4015	3648	3908	3916	LOC18767394
18790869	11978	10884	10734	3492	3435	3981	3674	3915	3976	3474	2682	2797	3141	3166	3258	2776	2985	3235	2369	2382	2658	3359	3465	3257	2720	3260	3008	4135	3419	3875	3548	3622	3316	3121	3309	3043	4223	3622	3830	3195	2644	2829	2431	2848	2503	2833	3045	2931	LOC18790869
18784913	3886	4126	4365	3398	3667	4614	4146	3227	3964	4807	5260	5032	4811	4460	4867	3888	3342	4016	3959	3708	4250	3998	3960	4359	4695	3935	4328	4206	3853	3711	3402	3459	3574	4017	3477	3453	3837	3072	3848	3108	2772	3339	1786	2045	1995	2003	2136	2170	LOC18784913
18786577	1716	1693	1689	3572	3520	4301	4159	3642	3982	3899	3609	3963	4698	4634	4953	4491	4108	4787	3599	3120	3735	4216	4192	4960	3863	4325	4205	4955	4212	4075	3675	3447	3758	3590	4070	4382	3844	4574	4830	3670	3234	3163	1976	3037	1989	2620	2858	2435	LOC18786577
18777304	6188	5702	5160	4791	4369	3134	3183	3237	3758	3169	2930	3655	2881	2690	3181	2729	2539	2922	4092	3913	4698	3171	3797	3253	2868	2930	2812	3401	2935	3313	3682	4038	3124	3507	3432	3146	3791	3828	4094	4571	4767	3957	3840	4954	3489	3920	4201	4256	LOC18777304
18789787	4463	4857	4642	3523	3660	4723	3639	3413	3697	4606	4455	4877	4555	3832	4444	4331	3798	4728	4084	3573	4123	3336	3414	3260	3321	2975	3158	3534	3189	3435	3162	3327	2901	3505	3582	3065	4149	3531	4018	3711	3297	3506	2660	3216	3006	3185	3332	3144	LOC18789787
18792963	1619	1882	1848	2726	3032	1277	3681	2776	3395	3737	3941	4069	4293	3388	4379	3392	3540	3667	4083	3723	4629	4198	4652	4576	4248	4460	4146	4435	3815	3735	4214	4182	4114	3913	4437	3936	4300	4566	4773	4473	4538	4336	3435	3437	3040	2899	3048	2956	LOC18792963
18773073	1646	1522	1770	2642	3068	842	2322	1771	2264	5205	6568	6656	3810	2495	3380	2918	3280	3728	5005	4124	4832	3341	3851	2984	3052	2695	2979	3278	3070	3181	2783	2663	2175	4635	4298	2993	3652	3572	3862	5334	5448	5040	3786	4185	6957	6069	5995	6102	LOC18773073
18791190	47	25	20	8215	6932	5168	2375	3560	4213	2764	2160	3562	570	437	636	804	688	1560	6810	8607	8694	2428	2890	2253	1184	1243	1339	1326	1135	1412	2149	2633	1588	2122	3101	2151	2335	3797	3126	5653	6489	5513	7299	9899	7496	8955	9866	10288	LOC18791190
18792929	4565	4736	5034	3882	4225	3913	4316	3338	4024	5026	5407	5638	4576	4254	4698	3704	2981	3894	3718	3641	4003	3846	3885	3929	4663	3945	4079	3926	3728	3656	3731	3714	3787	3558	2991	3144	3238	3014	3462	3357	2814	3329	1988	2003	2220	1917	1986	2022	LOC18792929
18766867	2937	2739	2929	3089	2936	5162	3492	3209	3717	3042	2846	3185	3134	2857	3094	3005	2442	3269	3581	3644	3858	3275	3390	3321	3364	3043	2963	3196	2866	3218	3605	3442	3129	3393	3635	3015	3870	3782	3912	4827	5353	4831	5511	6379	5765	5190	5421	5619	LOC18766867
18768489	5136	5079	5289	3184	3473	3278	4033	3533	4209	4215	3796	4008	4533	4435	4633	4134	3590	4565	3514	3425	3875	3779	4081	4171	4112	4081	3934	4336	3851	3820	3759	3624	3432	4055	3790	3841	3982	3393	3992	3203	3015	2950	2020	2077	2009	2037	2122	2061	LOC18768489
18779369	3638	3310	3145	3713	3492	4641	3668	2941	3795	3986	3392	3778	3587	2890	3208	3008	2873	3526	3291	3301	3490	3278	3551	3139	2980	2924	2932	3440	2966	3254	4048	3854	3337	3947	3605	2826	3133	3923	4404	5121	5054	4886	4843	5270	5133	4024	4615	4289	LOC18779369
18773490	5321	5337	5353	4231	4372	3572	4097	3839	4249	4664	4042	4188	3943	3455	3846	3796	3124	3970	4171	4033	4188	3562	4005	3425	3394	3287	3375	3719	3145	3359	3685	3668	3233	3808	3515	3033	2872	3532	3840	3555	3491	3433	2738	2850	2825	2609	2912	2662	LOC18773490
18780680	263	208	306	2664	2406	4562	4617	4809	6803	9697	6022	7093	2698	2304	2638	3033	2860	4832	4681	4366	6394	3755	4409	3012	2838	3404	2665	2474	2476	2827	3659	3082	2683	2460	3625	2212	3826	3310	2595	3798	4724	3690	4851	4899	3883	4020	4466	4322	LOC18780680
18771087	9	31	32	3022	5000	1425	2979	1490	1860	3235	2420	1612	3891	2730	1482	7477	926	1297	14515	7408	3263	2651	1470	1154	10409	2117	4993	3926	2963	2850	612	580	651	16866	24368	6977	573	1031	1618	1692	736	1403	2419	381	11287	4714	768	1805	LOC18771087
18769662	2899	2918	3348	3576	3739	2996	3471	3982	4294	4341	4060	3867	3999	3521	3649	3906	3050	3416	4149	3939	4863	3039	3260	2936	4487	3287	3173	3146	2833	3532	3085	3382	3047	3802	4634	3595	4879	3173	3217	4543	3800	4728	3122	3611	4104	4157	4293	4130	LOC18769662
18792168	2084	2156	2053	3815	3709	4366	3515	3169	3641	3105	2565	2811	2299	2178	2536	2613	2484	2712	3219	3238	4018	2798	3033	2951	2549	2728	2533	3480	2993	3365	3696	4036	3127	3468	4137	3540	4943	4423	4434	5110	5574	4656	6094	6660	5396	6246	6460	6221	LOC18792168
18789802	6014	6245	5816	3307	3531	4038	3550	3142	3760	4304	3641	4276	3876	3185	3907	3492	3480	4160	3017	3084	3595	3234	3347	3321	2969	3221	3162	3465	2797	3414	3388	3488	2976	3455	3792	3103	3988	3501	3694	3950	3543	3599	3505	3368	3719	3619	3907	3857	LOC18789802
18786806	4019	4221	4406	2991	3246	1257	4227	3450	3915	4331	4336	4485	5190	5378	5716	4597	4014	4505	3516	3162	3551	3922	4163	4641	4639	4134	4256	4748	4322	4031	3525	3507	3741	3976	3515	3978	4419	3482	4033	2970	2873	2851	1785	1836	1655	1701	1742	1541	LOC18786806
18769305	2056	1849	1815	3255	3421	3015	3720	3387	4267	3965	3655	4001	3749	3154	3601	3784	3564	4488	3679	3342	4036	3729	4364	4170	3869	4010	4087	4241	3774	3667	3787	3939	3505	4354	3991	3762	4592	4265	4333	3846	4203	3807	3255	3179	3300	3541	3531	3595	LOC18769305
18777232	4319	4067	3995	3146	3074	1877	3721	3276	3835	3986	3301	3710	4075	3519	4036	3762	3869	4545	3304	3251	3591	3519	3620	3541	3265	3428	3213	4163	3251	3832	3794	3656	3342	3956	3938	3591	4013	3965	4301	4158	3810	3660	3489	3831	3793	3425	3986	3682	LOC18777232
18792957	6490	7334	7230	2493	2864	2897	3648	2710	3151	3452	3858	4010	4847	4881	5346	4970	4161	5074	3013	2704	3038	4166	4206	4779	3683	4035	4277	4647	4006	3761	3198	3495	3448	3869	3272	3237	3419	3797	4592	2895	2657	2294	1796	2081	1662	1681	1755	1546	LOC18792957
18781119	6160	6374	6386	2823	2912	954	3641	2841	3461	3783	3694	4010	5010	4677	5181	4910	4520	5075	2789	2550	2919	3445	4129	4352	4303	4345	4368	4762	4050	3905	3456	3432	3428	4054	3656	3237	4205	3653	4406	2686	2736	2553	2104	2327	2055	1925	2106	1937	LOC18781119
18780495	2486	2093	2283	5466	4974	2097	3231	3474	4127	2610	2191	2405	2321	1895	2286	2442	2111	2922	4110	5182	5052	3969	4383	2999	2458	2684	2520	2693	2461	2780	3647	3659	2795	3892	4192	3063	4085	4749	4495	5105	5493	5174	5661	5000	4200	6213	6091	6030	LOC18780495
18780473	4315	4644	4702	3330	3591	2338	4201	2878	3997	4710	5420	4947	5164	4878	5316	3854	3443	3700	3836	3393	3343	4229	4027	4475	5260	4323	4459	4476	4136	3956	3602	3552	3663	4291	3124	3481	3202	3255	4029	2915	2453	2996	1628	1741	1955	1583	1722	1689	LOC18780473
18775704	6237	6500	5952	3471	3569	2221	3610	3235	3807	4212	3726	4019	4247	3579	3972	3750	3709	4191	3009	2938	3977	3150	3657	3312	3254	3415	3046	3980	3288	3544	3561	3613	3146	3875	3554	3041	4574	3463	3731	3514	3421	3587	2953	3164	3090	3118	3144	3055	LOC18775704
18779737	3174	2823	3105	3761	3752	4313	4283	3956	4296	4292	3237	3867	3243	3052	3119	2661	2640	3192	2373	2520	3589	2658	3567	2871	2830	3094	2685	3696	3377	3357	3440	3517	3105	3748	3472	3362	5228	4068	4187	4129	4170	3967	4366	5383	4502	5671	5195	5234	LOC18779737
18772365	3229	3362	3257	3480	3505	6435	3902	3549	4011	3927	3444	3705	3532	3353	3330	2946	2638	3572	3853	4041	4038	3598	4041	3704	3552	3501	3466	3653	3426	3585	3832	4017	3325	3510	3694	3230	3111	3744	3581	4008	3782	4023	3750	4026	3800	3674	3636	3522	LOC18772365
18791629	3812	3729	3671	3782	3679	2931	3827	3248	3867	3938	3495	3819	3855	3237	3531	3341	3374	4169	3136	3082	3997	3056	3486	3077	2837	3228	3033	3748	3178	3205	3613	3452	3353	3564	3554	3184	5131	3919	4229	4089	4058	3981	4164	4403	4259	4055	4258	4242	LOC18791629
18769096	3314	2965	2975	3886	3926	2290	3832	3149	3794	4515	3991	4615	3736	2795	3386	3363	3039	3969	4791	4954	5286	3461	3543	3291	3027	2896	2779	3146	2558	3110	3628	3576	3335	3104	4078	3301	3848	4318	4123	4324	4364	4347	3976	3827	4279	3616	3732	3711	LOC18769096
18768088	33	32	27	1587	2105	1242	4884	3089	4151	4694	5644	5669	5365	4955	5176	3827	3635	4350	3510	3026	2937	5216	5598	5803	6138	5680	5511	5630	5447	4340	3827	3909	4575	3361	3671	3865	2649	4303	4028	4157	4879	4476	2531	1728	1672	973	969	880	LOC18768088
18767380	3535	3536	3539	3505	3671	7308	3827	3271	3789	3928	3846	4011	4199	3725	4205	3899	3602	4119	3675	3556	3864	3687	3699	3850	3538	3542	3577	3899	3573	3626	3737	3488	3172	3596	3647	3223	3753	3384	3579	3382	3375	3445	2774	3067	2849	3266	3160	3139	LOC18767380
18784723	1360	1036	988	2360	2853	2705	4136	3308	3956	3613	3011	3261	3934	4276	5289	3878	3831	3089	2749	2533	2958	3285	4126	4875	3718	4455	4293	5909	5151	4637	3166	3749	3940	4004	4883	5295	5327	5667	6064	3488	3351	3040	3180	4641	2755	2446	2664	2386	LOC18784723
18784577	5406	4968	5081	2924	3061	2246	3632	2891	3616	4067	3672	4293	4362	3595	4277	4059	3958	4591	3287	3207	3402	3383	3648	3643	3664	3524	3671	4092	3669	3650	3497	3563	3324	3925	3527	3261	3721	3760	3947	3499	3428	3462	2830	3131	3018	3244	3490	3312	LOC18784577
18787947	3447	3231	3186	3267	3557	7531	3941	4085	4245	3950	3020	3356	3815	3516	3270	3363	3025	4447	3585	3298	3609	3789	3820	3609	3218	3576	2963	3541	3168	3740	4794	4522	3563	3743	4418	3595	4267	3874	3499	3956	4676	3516	3340	2350	2511	2858	2752	2948	LOC18787947
18772587	3493	3621	3603	2644	2757	1791	3209	2336	2890	3685	3596	3772	3854	3121	3774	3045	3142	3437	2654	2597	2949	2841	3336	3104	3241	3183	3273	3778	3014	3214	3422	3370	3136	3642	3217	3161	5061	3653	4200	4267	3898	3865	4402	5643	5110	6783	6657	6861	LOC18772587
18778842	3674	3549	3548	3619	3412	2998	3876	3522	4270	4047	3421	3862	3825	3131	3658	3315	3469	4075	2471	2639	3267	2834	3601	3304	3141	3384	3345	4088	3582	3451	3583	3791	3237	3988	3609	3230	4512	4104	4314	4132	3993	3992	4014	4538	3983	3764	3940	3942	LOC18778842
18791526	6318	6422	6324	3799	4044	2409	3677	2864	3579	3506	3378	3731	3863	3547	4096	3562	3345	3924	3795	3666	3842	3600	3562	3706	3616	3454	3566	3939	3300	3678	3530	3396	3195	3638	3489	3290	3392	3702	4027	3292	3349	3172	2713	2978	2836	2800	2944	2938	LOC18791526
18767239	4334	4362	4231	3971	4461	6368	3536	3337	3809	4496	4440	4389	3893	3403	3994	3378	3158	3472	4169	3979	4240	3723	3752	3355	3487	3292	3410	3577	3284	3474	3825	3542	3373	3639	3390	2790	2856	3358	3636	3626	3382	3688	2588	2815	3140	2728	2777	2591	LOC18767239
18784368	39	122	76	3246	3576	2940	4152	2446	3437	3495	3836	4072	4512	5924	6289	4147	3415	3499	3930	3357	3910	5971	6195	7655	6718	6567	6638	6319	6130	5096	4248	3957	3941	3979	3027	3706	2574	4582	4593	2237	2498	2704	992	1188	697	578	781	449	LOC18784368
18767160	3541	3865	4262	4035	4263	3767	4450	3625	4071	5346	5334	5409	4204	4130	4035	3383	2807	3625	3782	3529	4122	3653	3771	3832	4321	3909	3896	3932	3497	3616	3338	3250	3220	3761	3250	3316	3204	3153	3749	3312	2778	3376	2256	2328	2464	2625	2513	2514	LOC18767160
18793041	3449	2842	3274	3346	2942	1418	3037	2840	3512	3287	2679	3400	2924	2434	2828	2699	2657	3355	3503	3349	4107	2944	3600	2824	2737	2657	2547	3230	2929	3231	3277	3589	2874	3304	3673	2882	4891	3801	4035	4653	4738	4040	4859	5944	5341	7340	6976	7304	LOC18793041
18784947	2722	1854	2678	1650	2035	773	4058	2235	3347	2849	3840	4139	5892	5654	5899	5759	5186	6168	3534	2935	3394	5008	5588	5742	4607	5100	4892	4858	4889	4109	4076	3825	4381	3314	3208	3837	2770	3602	3646	3083	2410	2728	1607	2097	1688	1912	2366	2019	LOC18784947
18772809	5471	5818	5899	4668	4762	3850	4259	3881	4193	5067	4612	4910	4136	3672	3801	3584	2967	3784	3893	4035	4663	3808	3470	3457	3278	2948	3082	3189	2732	3222	3506	3474	3118	2965	3278	2951	3279	2827	2998	3535	2917	3327	2362	2492	2645	2404	2432	2287	LOC18772809
18780482	2760	3247	3448	4523	4441	7906	3234	3257	3638	3815	3250	3423	3027	2690	3014	2941	2533	3371	3963	3912	4031	3558	3580	3257	2952	2921	2743	3744	3140	3200	3735	3656	3035	3714	3618	3207	3817	4046	4107	4004	4411	3936	4023	3976	3583	3878	3958	3644	LOC18780482
18782620	6857	5755	6203	2494	2775	2478	3425	3535	4101	2769	2004	2310	3526	2804	2600	3614	3628	5154	2430	2461	2119	3324	4113	2796	2439	2553	2347	3561	3391	4673	5468	4676	3676	4897	5766	3843	2450	3058	2558	3589	3691	3765	3037	2702	3695	4903	4865	4686	LOC18782620
18790057	7779	11185	11532	3708	4489	5707	2126	1141	1851	2743	2173	2001	3481	2701	4094	3914	3196	2729	6138	3374	2801	1718	1896	1541	1592	1432	1373	4435	3689	3913	1196	1267	1176	2954	2646	1862	2501	3057	3880	2347	2771	2101	9484	5210	6359	5070	5031	4193	LOC18790057
18767094	4898	4423	4630	3229	3449	3115	3613	3168	3707	3934	3763	4110	3962	3382	4111	3712	3557	4038	3593	3342	3775	3521	3925	3536	3659	3661	3627	3844	3235	3501	3803	3646	3300	4071	3807	3294	3363	3886	4169	3878	3846	3687	2869	3016	2864	2532	2816	2645	LOC18767094
18767330	3476	3131	3222	3592	3623	2700	3000	2829	3445	3384	2680	3465	3095	2498	2857	2658	2889	3530	3572	3628	4122	3145	3437	2906	2805	2801	2768	3309	2669	3109	3475	3695	2890	3627	4010	3074	4700	4404	4244	4712	5113	4722	5164	5299	5131	4677	4885	4862	LOC18767330
18778791	1754	1503	1580	4163	3950	3467	3385	3770	4175	3384	2975	3526	2938	2426	2856	2767	2762	3442	3682	3789	3751	3325	3543	3086	2598	2957	2844	3236	2471	3123	3612	3738	3170	3257	3746	3166	3144	4610	4488	5036	5292	4957	5115	5198	4784	5552	5326	5196	LOC18778791
18781433	5328	5962	5570	1879	2137	1444	3460	2137	2821	3326	3598	3213	5716	5639	6413	4772	4757	5092	2567	2137	2509	3406	3498	4174	3990	3717	4126	4901	4548	4377	3068	2998	3083	3699	2976	2963	3899	3205	4330	3182	2924	3164	2496	2748	2416	2727	2766	2716	LOC18781433
18776972	3257	3127	2974	2919	2694	1235	3096	2895	3166	2230	2148	2228	2767	2241	2680	2846	2981	3460	3204	3242	3942	3048	3233	2899	2791	3041	2811	3555	3006	3521	4469	4420	3684	3347	4009	3412	5263	5404	5612	5945	6576	4598	4418	5647	4940	4311	4416	4694	LOC18776972
18776294	2319	2089	2357	4152	4093	3106	4161	4437	4255	4206	3259	3925	3878	3047	3248	3726	3563	4930	3294	3534	3140	3630	4076	3446	3322	3482	3166	3820	3347	3865	4456	4345	3725	3315	3304	3109	2752	4014	3703	4144	4316	4036	3071	2919	3475	3507	3437	3534	LOC18776294
18766514	785	1078	696	752	589	450	1777	1291	1800	1458	944	904	2895	5318	4909	3579	3450	2500	715	685	992	3470	4608	5166	1991	3972	3493	8581	8241	7704	4390	4144	5141	3866	3848	3104	3723	4178	5135	4936	4358	3716	5072	7424	3454	6573	7621	6538	LOC18766514
18785402	1878	1998	1911	5335	5082	4477	4193	3839	5882	3550	3033	3251	3233	3386	4217	3281	3057	2942	4319	4255	5127	3501	3655	3031	2841	2701	2855	3779	3587	3960	4396	3456	3663	4235	4016	2916	3298	2716	2975	2853	2690	2646	2400	3104	2609	5369	5334	5076	LOC18785402
18768529	1254	1107	1344	5070	5214	3835	4533	4396	4660	5633	4759	6069	3645	2391	2922	2895	2927	3684	3825	3867	4071	2918	3252	2796	3299	3121	2944	2886	2465	2982	3553	3426	3007	3622	3964	3255	3144	3787	3452	4412	4258	4359	3273	3111	3555	4315	4340	4142	LOC18768529
18778949	17	26	26	580	766	771	682	962	1105	2275	971	544	2407	1930	954	2939	2618	6293	3573	1382	1557	5631	8943	4862	1943	1301	1639	4881	5886	8384	4762	4910	2203	17027	11854	6673	2846	4289	4013	4420	5709	4218	4927	2387	4205	4454	3215	3647	LOC18778949
18789515	3038	2701	2788	5783	4964	3848	3513	3532	4290	3518	2768	3224	2046	2068	2131	2216	2076	2716	4620	4664	5551	3739	3761	2960	2493	2637	2643	3102	2614	3147	3880	3624	2986	3372	4169	3125	4617	3687	3547	4379	4307	4181	4147	4482	3474	4547	4908	4834	LOC18789515
18772580	3528	3125	3150	6090	5604	9692	5018	6742	6040	4077	2551	3046	2088	1443	1519	2104	1921	2804	3728	4183	4165	3696	3907	2557	2476	2572	2258	2382	1898	2609	4032	3754	3319	3133	3871	2731	3891	4187	3629	3821	4104	3668	3619	4046	3449	3067	2963	3097	LOC18772580
18772205	3776	3851	4037	3576	3322	1812	2984	2745	3347	2799	2597	2866	2378	2052	2607	2398	2212	2824	3374	3571	4226	3023	3695	2758	2491	2406	2407	3739	3142	3418	3225	3576	2778	3536	3896	3517	4094	4055	4324	4638	4406	3744	4370	6280	4529	6884	6245	6610	LOC18772205
18770029	3944	4142	4048	3332	3480	3399	4168	3378	3999	4970	4279	4689	4965	4975	5014	4444	4143	5025	3565	3016	3358	3704	3830	3990	3503	3531	3658	4240	3893	3964	3323	3195	3041	3792	3544	2985	4076	3161	3581	2786	2962	2660	1978	2078	2021	1661	1874	1635	LOC18770029
18790550	1133	1234	1263	2377	2132	1216	2119	1886	2446	1709	2165	2124	2251	1850	2558	2321	2316	2554	2238	1915	2293	2899	3696	3237	3199	2976	2934	3396	3306	2759	3199	4151	3070	4142	5002	3976	6082	4476	4671	5477	5595	4421	4686	6390	4653	10168	10529	9714	LOC18790550
18788663	1951	2103	2106	2208	2522	742	4159	2246	3451	3916	4640	4300	4416	4659	5568	3995	3608	3502	3296	2516	3558	3648	3998	4657	5360	4653	5248	4897	4733	4333	3446	3547	3732	4601	3483	3358	5482	3892	5614	3465	2948	3134	1990	3069	2012	1824	2178	1975	LOC18788663
18789817	3834	4193	4196	2913	3174	4453	4399	3517	4173	4386	4369	4115	5139	5524	6071	4821	4339	4769	2967	2674	2789	3684	3585	4206	3972	3630	3834	4238	3986	3800	3222	3205	3095	3590	3618	3576	2956	3013	3507	2424	2325	2561	1736	1916	1887	2121	2155	2042	LOC18789817
18769664	3183	2928	3004	3834	3781	4384	3338	3162	3842	3569	3030	3384	3106	2500	3060	3022	2688	3267	4088	3766	5130	3657	3648	3168	2742	2979	2824	2898	2574	2793	3471	3366	3003	3004	3519	2595	4186	3736	4040	4821	5307	4608	4368	4504	4054	4063	4431	4137	LOC18769664
18785602	3939	4152	4064	3133	3249	1899	3683	3083	3585	3967	3545	4074	4274	3650	4160	3887	3690	4292	3332	3173	3720	3252	3644	3539	3582	3484	3519	4005	3462	3728	3647	3514	3408	3710	3758	3289	4055	3728	3780	3695	3506	3675	2750	3040	3031	2820	3119	2905	LOC18785602
18787722	3801	4215	4357	3210	3481	1791	3623	2735	3431	4366	4647	5087	4254	4449	4651	3686	3186	3592	4317	3556	3890	3870	4117	4066	4661	3734	3871	3786	4013	3597	3247	3797	3339	3597	3072	3317	2704	3180	3863	3388	3003	3102	2068	2319	2259	2647	2579	2580	LOC18787722
18766376	4705	4743	4763	3484	3652	2386	3613	3294	3717	3743	3429	3960	4041	3388	3905	3701	3465	4098	3526	3464	3385	3299	3657	3411	3058	3174	3186	3475	2982	3174	3347	3373	3094	3700	3532	3041	3016	3820	4264	3632	3756	3575	3146	3305	3175	3316	3558	3395	LOC18766376
18775110	3921	4442	4568	3154	3222	4265	4252	3331	3870	3938	4030	4389	4773	4563	4529	4147	3479	4456	3496	3298	3566	3722	3845	4142	3970	3720	3782	4059	3651	3624	3280	3208	3274	3698	3432	3635	3811	3146	3641	3000	2687	2922	1880	2266	1908	2024	1905	1879	LOC18775110
18774812	5957	6694	6384	3090	3135	3700	3312	3294	3569	3308	2678	2501	2913	2308	2442	2687	2699	3154	3409	3321	3086	3612	3622	2977	2385	2522	2425	2784	2522	3457	3114	3030	2408	3691	4650	3122	3556	3545	3523	3846	3781	3713	4250	3708	4712	5095	4956	5112	LOC18774812
18789695	11139	13015	12490	6831	6584	4517	3913	4052	4536	4639	3326	4116	2805	2531	2558	2333	2383	2441	3440	3436	3250	2428	2632	2675	2051	2269	2239	2153	1935	2086	1915	1952	1804	2851	3534	3204	2628	3049	3005	2986	2122	2480	1505	1701	2304	2479	2748	2674	LOC18789695
18785547	5732	5613	5589	2715	2868	1792	3519	3172	3838	3701	3515	3460	3954	3666	3792	3583	3374	4465	3345	3067	3137	3355	3589	3536	3182	3143	3102	3901	3405	3944	3566	3460	3082	3666	4082	3575	3780	3281	3701	3434	3310	3190	2784	2960	2914	3280	3335	3272	LOC18785547
18774043	3039	2974	2783	3207	3309	3796	3841	2969	3926	4238	3679	4018	4140	4037	4558	4091	4126	4701	3291	3101	3733	3640	4328	4509	3686	4066	3965	4748	4061	3850	3555	3561	3539	3979	3523	3431	4712	4329	5068	2864	3034	2687	2145	2409	1916	1613	1485	1423	LOC18774043
18791423	5175	5168	5080	3299	3421	2764	3530	3053	3744	4336	3966	4146	4297	3670	4401	3659	3613	4170	3151	3129	3577	3420	3615	3631	3529	3528	3645	3744	3149	3412	3460	3264	3034	4044	3600	3308	3769	3376	3845	3484	3466	3615	2320	2346	2529	2346	2504	2308	LOC18791423
18787099	3101	3089	2899	3748	3697	4548	2893	2985	3375	2965	2667	3094	2780	2136	2587	2733	2567	3300	4147	4213	4608	3238	3332	2973	2345	2604	2512	2980	2709	3073	3368	3413	2948	3817	4010	2942	3961	3721	3839	4223	4580	3995	5207	5412	5047	5054	5019	4976	LOC18787099
18772811	4724	4303	4308	3327	3272	2366	3076	2300	3085	3153	3376	3542	3506	2890	3534	3204	3025	3293	3839	3514	3899	3196	3468	3287	3313	3110	3231	3568	3066	3169	3447	3472	3150	3879	3526	3177	4022	3855	4188	4083	4011	3924	3809	4002	3820	3780	4208	4103	LOC18772811
18775285	2150	1873	1947	3389	3219	407	2687	2350	2673	2333	1916	2880	2348	1681	2345	2404	2135	2649	4382	4842	5574	3562	4514	2906	2646	2624	2431	3093	2705	3411	3899	3602	3154	3538	3890	2548	4180	3719	3709	5058	4480	4181	4698	6266	5187	7566	7734	7818	LOC18775285
18784004	4779	4658	4594	2818	2900	3224	3445	2880	3335	3873	3905	4043	4512	3994	4582	3911	4076	4403	3219	2847	3108	3254	3399	3363	3455	3408	3489	3792	3496	3440	3231	3387	3095	3598	3188	3112	3604	3298	3817	3271	3384	3403	2900	3066	3344	3131	3225	2993	LOC18784004
18773882	2839	3116	3232	3605	3840	4424	4197	3011	3891	4456	5275	5349	4285	4376	4539	3542	2795	3377	3955	3537	3958	3657	4048	3938	4862	4149	4304	3956	3919	3587	3566	3478	3416	3455	3085	3081	3624	2863	3713	3113	2665	3280	1861	2031	1888	1800	2106	2062	LOC18773882
18779497	4886	4335	4359	4008	4091	1888	3945	3916	4059	3673	3223	3596	3759	3279	3482	3479	3314	3906	3075	3112	3991	3050	3593	3099	2989	3100	2972	3428	3160	3278	3751	3250	3294	3446	3504	3106	4814	4059	4233	3818	3880	3813	2646	3284	2682	3267	3140	3070	LOC18779497
18771211	6593	10749	10552	3854	5383	4657	1792	1236	1788	6321	4631	2217	2239	1836	1961	1867	877	888	11341	5856	4562	1882	1503	1511	3796	1787	2388	2580	2434	3485	682	563	653	8130	9036	4654	1830	1745	2340	2004	1180	2178	4032	1476	6169	4112	2781	2933	LOC18771211
18780086	4549	4285	4364	3243	3195	1826	3444	2972	3545	3996	3479	3798	3666	3082	3551	3018	3018	3661	2735	2748	3557	2669	3741	3048	2991	3301	2962	3649	3151	3395	3332	3483	3074	3608	3492	3190	4532	3810	4079	3816	3787	3804	3699	3813	4015	4272	4320	4230	LOC18780086
18783712	4232	3820	3808	3359	3377	3867	3278	2759	3439	3898	3377	3976	3667	3028	3590	3225	3268	3992	3164	2907	2960	3019	3217	2997	2811	2894	2917	3391	3013	3277	3418	3455	2936	3445	3502	2933	2977	3833	3862	4270	4157	4114	4332	4388	4514	3918	4130	4271	LOC18783712
109947183	3570	4077	4066	3382	3547	3550	4264	3775	4248	3854	2976	3762	2886	2581	2973	2954	2433	3258	3296	3680	3999	3471	3425	3112	2607	2893	2548	2812	2253	2853	3199	3088	2754	3078	4106	3847	4036	4158	3719	4354	3672	3946	3847	3875	3469	4945	4804	4907	LOC109947183
18769167	3382	3827	3614	3816	3796	5721	3842	3314	3571	4252	4147	4312	3776	2936	3579	3241	3155	3432	3437	2951	2932	3219	3047	3222	3250	3253	3266	3061	2532	3012	3532	3525	2937	2555	3024	2860	3062	4012	3960	4338	3689	4029	3840	3653	4338	3547	3552	3557	LOC18769167
18789521	2607	2653	2808	4679	4148	4374	4453	4172	4524	4874	3825	4046	4199	3671	3724	4151	3342	4186	3275	3324	3677	3507	3567	3344	2753	2699	2760	3224	2920	3172	3106	3083	2908	2846	3203	2817	3670	3482	3487	3869	3491	3192	3505	3803	3275	3518	3584	3336	LOC18789521
18773640	4231	3860	4221	3120	3044	5114	3595	3170	3514	4083	3498	3463	3858	3415	3748	3589	3296	3824	3475	3622	3546	3440	3524	3542	3353	3463	3256	3879	3255	3709	3537	3523	3262	3514	3865	3404	3243	3579	3691	3562	3333	3277	2957	2951	3218	2962	3130	2963	LOC18773640
18766147	3677	6412	3772	1572	1550	1343	6439	5749	4087	2996	1907	2389	7318	9476	6829	4858	4495	4499	1595	1439	2034	4676	3579	6050	2414	2593	3580	7772	7279	6537	3063	4119	4383	2076	2019	2339	5526	5156	6540	918	802	948	276	1230	71	67	128	91	LOC18766147
18791686	2996	3179	3107	3576	3886	2495	4015	3505	4134	4563	4042	3983	4740	4685	5014	3951	3746	4188	3540	3165	3809	3627	3791	4158	3837	3896	3792	4501	3817	3814	3388	3197	3203	4126	3701	3664	3964	3720	3953	2940	2888	2913	2033	2156	1870	1834	1800	1699	LOC18791686
18788187	109	38	105	7869	7847	6373	4667	4524	4425	5442	4735	7339	4642	4414	5077	4244	3914	5434	5700	4743	5281	4078	4610	5678	3494	4738	4190	4780	4353	4316	3823	3351	4396	2448	1986	2250	1738	2963	3303	1254	796	1224	235	619	146	297	297	219	LOC18788187
18767629	4030	3883	4059	4119	4010	4406	3256	3413	3960	3570	2729	3066	2726	2120	2520	2828	2547	3400	3507	3595	4213	3099	3373	2654	2349	2381	2331	3036	2565	2930	3165	2998	2671	3932	3962	2878	4046	3728	3743	3870	4344	3781	4334	4663	4583	4891	5057	5109	LOC18767629
18778862	2745	2784	2897	2913	3184	1381	3514	2760	3537	3966	4136	4205	4085	3906	4226	3562	3036	3400	3725	3587	3837	3749	3893	3654	3991	3546	3686	4007	3438	3483	3535	3635	3276	3578	3093	3076	3481	3480	3974	3989	3537	4114	3124	3285	3507	3666	3484	3559	LOC18778862
109948554	4016	4117	3999	3125	3439	4194	3607	2791	3455	3972	3997	3947	4228	3698	4462	3772	3445	3894	3350	3080	3899	3378	3689	3717	3902	3736	3886	4000	3634	3273	3658	3456	3355	3950	3200	3002	3955	2962	3775	3199	3136	3231	2374	2520	2757	2643	2636	2567	LOC109948554
18775958	4466	4482	4408	3848	3935	5101	3170	2878	3697	3694	3308	3615	3433	2835	3299	3009	3053	3583	3625	3387	3667	3350	3322	3201	2967	2730	3072	3276	2754	2963	3445	3340	2946	3347	3478	2772	3286	3540	3564	4481	4189	4115	3747	3715	3410	3400	3527	3567	LOC18775958
18771998	3188	2904	2980	3172	3028	1664	3216	2711	3227	2993	2651	3133	2766	2466	3007	2958	2749	3387	3152	3134	3564	2735	3330	2595	2537	2451	2447	3420	2812	3151	3261	3403	2928	3249	3446	2882	3443	3756	3917	4356	3771	3677	4862	5465	4926	7500	7571	7865	LOC18771998
18778479	3012	2946	3024	3633	3560	4560	2877	2925	3257	3198	2748	3176	2816	2307	2663	2711	2437	3054	3468	3507	4356	2785	3019	2708	2383	2436	2404	2799	2345	2625	3221	3227	2612	2922	3189	2370	3597	3500	3656	4644	5015	4301	5419	6134	5381	6096	6327	6114	LOC18778479
18793886	2637	2501	2623	5319	4872	5288	3414	3817	4110	4137	2868	3563	1785	1302	1629	1603	1509	2002	3406	3955	4592	2673	2844	2190	2055	1773	1964	2106	1724	2239	3303	3313	2675	2654	3102	2390	4718	3706	3556	5094	5854	4883	5769	6067	5597	6025	6176	6039	LOC18793886
18784827	4258	3691	4016	4386	4806	4070	3995	3390	3919	4276	4429	4438	4164	4118	4681	3894	3443	3873	5772	4730	5983	3449	3591	3881	3624	3473	3876	3863	3556	3630	3140	3087	3078	3532	2850	3360	2337	3173	3524	2573	2331	2543	1514	1690	1527	1314	1343	1208	LOC18784827
18791410	2965	3029	2943	3046	3111	2091	3603	3105	3546	3528	3300	3514	3993	3571	4136	3716	3423	3986	3361	3345	3514	3519	3878	3687	3518	3703	3606	3984	3553	3667	3911	3704	3827	3511	3805	3626	3960	4062	4031	3968	3690	3520	2657	3162	2701	3019	3067	3041	LOC18791410
18774376	2590	2806	2775	2740	2920	3261	4276	3569	4041	5160	4536	4676	3856	3669	4086	3487	3315	3956	3657	3449	4127	3733	3857	4115	4218	4241	4482	4415	3724	3653	3841	3575	3694	3261	3727	2995	4263	3586	3711	3792	3283	3632	2000	2499	1604	1340	1550	1403	LOC18774376
18767303	5758	5890	5750	3974	4040	1703	3237	3124	3568	4245	3734	3996	3402	2828	3280	2681	2454	2862	3190	2842	3774	2843	3250	2876	3102	2842	2929	3154	2799	2930	3274	3263	2966	3378	2981	2681	4188	3382	3817	3958	3694	3976	3446	3969	3612	3659	4002	3736	LOC18767303
18775083	4027	4353	4623	3538	3904	2439	3516	3034	3697	4156	3944	4269	3961	3492	4022	3425	2802	3599	3534	3555	4084	3318	3450	3143	3507	3024	3150	2968	3078	2927	3414	3324	2938	3335	2962	2564	3820	3157	3614	3703	3428	3744	2902	3370	3183	3684	3750	3549	LOC18775083
18793580	5494	5922	5827	4126	4027	3396	3259	2803	3551	4138	3886	4007	2784	2212	2645	2671	2273	2727	3587	3229	3622	3254	3255	3267	3168	3041	3100	2735	2381	2722	2869	3021	2417	2957	3510	2786	2923	3614	3739	4176	3720	3663	3160	4205	4188	3985	4466	4412	LOC18793580
18786910	3536	3447	3400	2569	2931	2163	3607	2996	3230	3727	3367	3886	4241	3649	3969	3835	3729	4218	3103	2975	2965	3417	3650	3727	3550	3563	3652	4142	3714	3898	3573	3527	3454	3733	3646	3480	3087	3896	4137	3778	3649	3564	2769	2934	3017	3255	3338	3186	LOC18786910
18766400	1865	1568	1649	5318	6403	4258	3702	3413	3776	4399	3683	3722	4124	4938	4040	4297	3821	3530	5432	4450	5030	4003	3644	4414	2458	3124	3071	5605	4608	5321	3709	3192	3090	3323	3231	2779	3278	6349	6154	2236	2051	1986	914	1623	1272	720	599	550	LOC18766400
18788517	3435	3525	3762	2659	2710	2544	3619	3264	3543	3456	3276	3507	3748	3666	3760	3424	3167	4040	3022	2934	3255	3698	3937	3748	3700	3473	3370	4045	3536	3619	3657	3749	3491	3678	3686	3583	3800	3650	3857	3917	3780	3718	3229	3173	3159	3048	2951	2948	LOC18788517
18785483	3823	4155	4131	3040	3335	2224	3748	2857	3790	4349	4656	4636	4751	4461	4937	3875	3365	3751	3497	3122	3342	3602	3658	3996	4314	3614	3819	3875	3657	3550	3368	3277	3030	3861	3154	3216	3819	2879	3458	3154	2645	2980	2058	2229	2319	2291	2457	2386	LOC18785483
18779227	855	742	656	3385	3141	4728	4017	4509	5654	3899	2581	2756	2346	1848	1958	2229	2024	3491	2454	2503	2584	3878	4551	2827	2181	3353	2459	2808	2373	3199	5085	4567	3432	3278	4225	2227	3343	4020	3636	4784	6104	4930	6094	4290	4528	4943	5421	5305	LOC18779227
18785396	3485	1867	3592	3343	4110	902	6262	5039	5916	5869	5766	6863	4821	4351	3564	3345	4378	6577	3310	3284	3118	3447	5058	3790	2450	2758	1946	2638	2308	2954	6010	5504	4453	3094	2985	3058	1377	3330	2530	2679	3219	3423	1839	966	1218	1049	1242	1068	LOC18785396
18776932	6694	6765	6873	3220	3261	2616	3645	2735	3703	3665	3561	3719	4263	3903	4136	3890	3576	4331	3080	2927	3222	3435	3577	3562	3364	3423	3354	3684	3468	3522	3481	3310	3240	3711	3054	3039	3370	2979	3273	2739	2587	2558	1934	2127	2169	2501	2529	2364	LOC18776932
18791841	2596	2490	2372	4140	3908	4466	3339	3573	3846	3300	2747	2975	2942	2707	3048	2690	2666	3099	3716	3821	3976	3422	3497	3433	2623	2783	2725	3214	2768	3238	3352	3360	2730	3019	3599	3213	4087	3916	3775	4372	4525	3941	3995	4798	3677	4660	4631	4272	LOC18791841
18791874	5225	5755	5475	3224	3505	2520	3918	3265	3705	4050	4049	4034	4149	4092	4067	3687	3428	4197	3834	3539	4183	3769	3978	3815	3430	3190	3360	3474	3321	3432	3409	3390	3002	3321	3294	2955	4284	2988	3156	2672	2570	2762	2098	2124	2093	2147	1979	2059	LOC18791874
18775970	5214	5056	5322	3239	3426	1816	3321	2620	3368	4518	4532	4746	4265	3663	4140	3210	3018	3511	2835	2813	3377	3131	3349	3179	3968	3666	3483	4037	3443	3303	3587	3522	3393	3762	2913	3195	3839	3136	3727	3194	3039	3711	2322	2482	2747	2506	2611	2551	LOC18775970
18777331	1927	1887	1680	4033	3708	3634	3497	3412	3592	3467	2998	3210	3113	2865	2940	2988	2815	3345	3512	3353	3581	3553	3735	3379	3019	3019	2892	3402	2913	3510	3268	3364	2874	3513	4163	3297	3532	3750	3719	4459	4485	4013	4044	4093	3591	4955	4793	4754	LOC18777331
18778225	4780	4923	4886	3801	4000	2089	3212	2848	3376	4353	3952	4390	3927	3469	3696	3331	3083	3563	3585	3483	3901	3226	3470	3418	3273	3046	2945	3391	3192	3476	3363	3482	2938	3345	2967	2863	2926	3184	3306	3624	3492	3789	2935	2935	3112	3020	3091	3149	LOC18778225
18786415	5049	4893	5152	3659	3358	2927	3651	3498	3708	3722	3243	3475	3524	3071	3372	3014	3060	3878	3063	2948	3760	2953	3508	2983	2701	2692	2501	3204	2921	3217	3145	3142	2695	3245	3267	2741	4542	3462	3782	3612	3388	3341	3168	3734	3347	4041	4029	4163	LOC18786415
18783820	2194	2237	2060	3201	3250	3038	3534	3378	4027	3696	3174	3402	3283	2731	3005	2832	2750	3304	3296	3486	3461	3545	3641	3460	3060	3083	2913	3693	2961	3389	3413	3159	2843	3767	3996	3205	3211	3840	3880	4518	4756	4230	4285	4277	3992	4301	4235	4500	LOC18783820
18772792	3242	2874	3275	3203	3269	1225	3209	2381	3072	3214	3055	3617	3134	3082	3181	2931	2340	3278	3845	3739	4764	3210	3891	3191	3436	3179	2971	3555	3414	3475	3494	3694	3138	3362	3199	3047	5339	3484	3705	3685	3501	3322	3404	4051	3628	5255	4863	4958	LOC18772792
18777565	3140	3386	3315	3233	3307	6617	3904	3200	3966	3945	4057	3643	4085	3690	4120	3476	3355	3701	3349	3087	3196	3720	3770	3945	3743	3733	3816	3882	3443	3592	3432	3266	3266	3519	3561	3379	3313	3326	3638	3219	3250	3385	2144	2318	2291	2198	2312	2144	LOC18777565
18772661	2923	2691	2895	4937	4469	3170	3482	3727	4008	4039	2759	3413	2788	2320	2866	2802	2486	3261	3557	3624	4780	3125	3359	2731	2589	2373	2235	2724	2450	2846	3271	3438	3044	2948	3076	2438	4917	3707	3635	4643	3972	4092	4186	4753	3924	4713	4516	4523	LOC18772661
18777201	4736	4762	4843	3666	3820	2323	3578	3813	4015	3807	3146	3774	3300	2769	3056	2894	2694	3274	3158	3206	4057	3101	3813	3061	2813	2990	2701	3518	2937	3347	3780	3742	3283	3114	3382	3040	4214	3626	3582	3575	3620	3693	3074	3243	3081	3355	3414	3279	LOC18777201
18766695	5197	5659	5892	2649	2814	1797	3022	2744	3188	3055	2887	3137	3221	2840	3239	3312	3041	3702	3089	2735	2989	3033	3137	3117	3225	3169	3046	3708	3184	3408	3252	3299	2886	3671	3576	3444	3806	3483	3967	3851	3878	3537	3853	4012	3895	3867	3864	3632	LOC18766695
18768134	2711	2757	2378	5685	5195	6378	3904	4326	4782	4311	2839	3586	1866	1290	1764	1517	1250	1691	4162	4757	5705	3373	3394	2624	2480	2146	2280	2058	1587	2230	3172	2819	2502	2969	3630	2388	3340	3330	3041	4886	5169	4630	4625	4263	3950	4890	5057	5129	LOC18768134
18793846	3682	3704	4071	2975	3460	4018	3898	2949	3785	3840	4370	4500	4415	4162	4449	3634	3023	3980	3859	3641	3281	4069	4153	3862	4387	3762	3857	3853	3588	3660	3664	3606	3257	3645	3214	3316	2147	2812	3195	2798	2418	3008	1971	1892	2172	2124	2352	2221	LOC18793846
18778019	4320	4291	4353	3536	3228	1867	3007	2706	3113	2896	2889	3332	3472	2878	3366	3326	3243	3675	3169	2975	3492	3108	3419	3150	2938	2933	2832	3565	3018	3354	3487	3508	3126	3599	3514	3167	4054	3902	4034	3991	3952	3711	3595	4317	4109	3627	3729	3762	LOC18778019
18793899	5194	5278	5128	2981	3172	1603	3139	2337	3175	3317	3117	3352	4083	3522	4112	3854	3741	4161	3558	3120	3495	3310	3626	3473	3235	3238	3464	3755	3079	3349	3209	3217	2896	3740	3584	3093	3119	3502	3845	3309	3024	3329	3075	3119	3131	3013	3197	3228	LOC18793899
18787133	4084	4250	4571	2940	3355	2435	3853	2846	3702	4043	4249	4457	4567	4417	4937	3916	3520	3910	3484	3335	3502	3662	3582	4019	4079	3630	3636	4039	3742	3570	3344	3442	3289	3765	2919	3290	2942	3205	3692	2876	2665	3141	1820	2019	1907	1964	2054	1879	LOC18787133
18776175	3765	3852	4007	2914	3209	2651	3877	2905	3598	4211	4134	4010	4936	5240	5675	4265	4016	4463	3172	2718	3052	3545	3677	4373	4178	4023	4075	4283	4145	3691	3113	3081	3094	4046	3388	3658	3309	3121	4144	2596	2543	2449	1568	1542	1611	1493	1527	1432	LOC18776175
18774444	679	651	831	1121	1337	164	2578	2186	1978	3164	3355	3475	4098	3513	3741	3430	3423	4018	2375	2152	2489	3451	3977	3702	3748	3402	3573	4161	3486	4397	4810	4688	3907	3446	4071	3284	4612	4391	4463	6755	6105	6263	3812	4128	3973	3519	3758	3707	LOC18774444
18792248	3633	3533	3511	2929	3231	1483	3853	3195	3857	4552	4035	4372	4400	3614	4462	3818	3562	4061	3062	2824	3049	3538	4035	3691	3673	3706	3686	3909	3222	3654	3453	3373	3096	3796	3843	3537	3604	3472	3742	3438	3343	3383	2275	2382	2357	2242	2411	2347	LOC18792248
18783618	2049	1660	1801	3314	3069	2765	3517	3440	4034	3821	2832	3387	2983	2559	2752	2935	2917	3582	3098	3109	3236	2947	3652	3059	2724	3077	2884	3454	2811	3503	3428	3394	2799	3331	3620	3098	3254	4128	4208	4316	4679	3876	4744	5225	4310	4859	4841	5083	LOC18783618
18792313	1320	973	1046	3982	3822	3750	4462	4742	6292	3542	2362	2865	2408	2097	2194	2585	2458	3144	3677	3908	4112	3366	3784	2707	2930	2967	2673	2750	2564	3574	3567	3292	2919	3347	4394	2816	3269	3507	3290	4246	4313	4513	4495	4223	4521	4322	4796	5228	LOC18792313
18788702	3638	3882	3949	3396	3675	4977	3657	2932	3786	4543	4706	4956	4079	3576	4125	3294	2799	3448	3739	3323	3908	3568	3496	3715	4094	3540	3654	3501	3472	3272	3477	3471	3155	3375	3093	2914	3227	2833	3256	2831	2759	3099	2104	2163	2325	2373	2473	2408	LOC18788702
18785082	4051	3751	4579	6054	5629	3993	2748	2486	3045	2719	2506	2772	2025	1759	2229	1811	1834	2403	5622	5788	6783	3022	3209	2865	2287	2418	2322	2130	1909	2109	3268	3247	2511	2373	2574	2326	3242	3654	3584	4880	4721	4434	4793	4897	4002	4035	4261	4372	LOC18785082
18791529	2286	2316	2204	3389	3244	6459	3814	3457	3623	3985	2881	2925	3370	3190	4125	3379	3099	3254	3097	3033	3558	3510	3510	3738	3274	2974	3295	3684	3068	3206	3297	3136	3010	3301	3662	2709	4286	3248	3459	3897	3772	3624	3674	3999	3643	3447	3612	3287	LOC18791529
18768497	3513	3748	3741	4100	3987	4341	3395	3244	3879	3785	3329	3654	3061	2780	3030	2940	2449	3036	3847	3995	4034	3239	3498	3278	2915	3091	2922	3209	2791	2993	3167	3081	2788	3182	3352	2734	3366	3210	3304	3562	3656	3301	3732	3887	3435	4088	4146	4180	LOC18768497
18773699	3253	3417	3409	3588	3396	2572	3434	3370	3805	3948	3619	4124	3474	2855	3126	2986	2671	3442	3944	4115	4014	3515	3708	3498	3164	3351	3186	3408	2904	3184	3461	3373	3107	3663	4029	3720	3133	3794	3849	4149	3829	3924	3051	3048	2818	2891	2827	2813	LOC18773699
18769408	3415	3427	3841	3215	3520	1710	3212	2890	3486	3915	3875	3952	3214	2915	3162	2811	2654	3225	4376	4214	4673	3619	4095	3312	3513	3256	3265	3414	2900	3403	3702	3639	2993	3935	3708	3144	2753	3475	3627	3876	3780	3908	3120	2960	2860	3262	3436	3248	LOC18769408
18775360	1652	1669	1643	4335	4189	5070	4223	4257	5309	7767	5279	6018	3747	3589	3579	4284	4299	5595	3802	3698	4030	3743	3873	4061	3377	3690	3239	3432	2970	3401	2740	2630	2410	2680	3665	3580	2857	3321	2832	2521	2417	2305	1808	1529	1447	1677	1752	1902	LOC18775360
18768165	3735	4191	4417	2219	2457	1832	3032	2626	2734	2916	3065	2963	4695	4230	4514	4133	3709	3617	2907	2357	2156	3466	3169	3535	3006	3210	2978	3663	3001	3932	2219	2087	2295	3448	4297	4183	2662	3268	3663	4115	2838	3810	2760	3114	4112	5500	5547	5406	LOC18768165
18789681	2022	2103	1876	3834	3396	2983	3683	3993	4234	3377	2812	3284	2955	2422	2766	2795	2442	3350	3357	3495	3550	3375	3506	2984	2541	2718	2510	3049	2631	3087	3393	3452	2930	3507	4015	3245	3470	3835	3653	4501	4175	3957	4019	4312	3650	5566	5294	5448	LOC18789681
18782288	3354	3066	3053	2953	3134	2348	3210	3242	3705	3888	3269	3380	3845	3290	3521	3278	2978	3641	3452	3245	3623	3533	4132	3394	3374	3652	3240	4059	3655	4315	4170	3722	3347	3907	4022	3293	3723	3367	3545	3480	3261	3049	2826	2923	2679	3247	3099	2996	LOC18782288
18776452	3498	3545	3529	3061	3185	5022	3595	2735	3438	3590	3504	3751	3910	3404	3882	3611	3639	3792	3416	3146	3480	3468	3652	3389	3411	3423	3577	3863	3366	3463	3610	3412	3087	3728	3598	3047	3446	3523	3918	3440	3242	3267	2663	2896	2890	2441	2480	2387	LOC18776452
18768326	5455	5524	5770	4127	4203	4579	3625	3681	4280	3629	2949	3391	3149	3092	3082	3262	2704	3387	3798	3690	4308	3279	3401	3278	2989	2807	2737	3082	2823	3031	2961	2920	2760	3203	3198	2874	3645	3157	3130	3030	2803	2898	2793	2822	2435	3187	3235	3153	LOC18768326
18775034	5428	6368	6387	5528	5439	3448	3900	4835	4922	4527	2514	3480	2392	1449	1430	1544	1288	1801	4838	5005	4292	2748	2866	1940	2085	2077	1779	1829	1479	1998	3054	2227	2181	4777	5029	3926	2401	3677	3072	3549	3809	3627	2735	2515	2515	4987	4618	4957	LOC18775034
18786807	3671	3567	3741	2592	2818	1226	3134	2548	3062	3288	3220	3331	3809	3410	3936	3547	3215	3847	3234	3046	3409	3229	3673	3615	3403	3559	3494	3994	3427	3500	3518	3531	3325	3912	3750	3529	3965	3898	4027	3546	3433	3327	2868	3291	3099	3491	3563	3459	LOC18786807
18791431	3312	3304	3508	2907	2993	3231	3191	2695	3243	4010	3938	4235	4379	3625	4095	3488	3220	4007	3340	3030	3571	3229	3426	3428	3682	3505	3530	3880	3496	3478	3645	3642	3291	3478	3246	3057	3732	3500	3782	3288	3052	3514	2483	2616	2982	3002	2960	2805	LOC18791431
18790812	4572	4250	4305	3518	3657	3306	3483	3262	3680	3640	3387	3911	3687	3378	3585	3357	3139	3884	3632	3375	3984	3558	3730	3425	3100	3257	3245	3547	3138	3283	3497	3495	3132	3351	3731	3219	3771	3460	3234	3559	3068	3348	2330	2587	2423	2521	2621	2321	LOC18790812
18785067	3136	3179	3044	3285	3205	5252	3353	2964	3563	4177	3886	3601	3852	3444	4077	3223	3183	3673	3469	3077	4104	3666	3766	3654	3737	3527	3624	3764	3413	3425	3313	3348	2998	3342	3454	3340	4388	3433	3640	3273	3174	3129	2178	2458	2358	2684	2639	2426	LOC18785067
18793783	115	74	147	2640	3516	823	1584	3665	3951	338	256	342	1163	982	761	914	794	2261	3573	3770	5322	2955	4145	3163	1999	2805	1925	3448	3108	4892	8250	7400	6407	3483	3906	4753	6082	7706	5880	5465	7634	7049	5838	2448	4734	3647	3409	3332	LOC18793783
18766494	2689	2543	2420	2873	2847	2827	2999	2265	2930	2947	2935	3451	3721	3024	3830	3466	3287	3977	3210	2912	3674	3083	3665	3458	3031	3449	3253	3864	3314	3485	3714	3559	3412	3837	3736	3158	4391	4298	4590	4581	4382	3914	3474	4203	3233	2729	3234	2971	LOC18766494
18774925	4592	4671	4460	3823	3773	2225	4006	3927	4516	4050	3898	4199	4122	3557	3910	3871	3254	4209	3474	3499	3888	3648	3565	3523	3356	2976	2979	3479	3065	3467	3373	3169	3031	3146	3408	2935	2844	2963	2980	3126	3008	3069	2241	2339	2201	2203	2363	2402	LOC18774925
18792525	3962	4322	4349	2842	3200	2322	3554	2422	3436	4160	4482	4165	4315	4458	5008	3512	3377	3291	3480	3140	3293	3538	3740	4206	4465	3800	4160	4201	3904	3684	3169	3229	3295	3820	3388	3560	3296	2971	3849	2762	2386	2950	1805	2101	1796	1738	1998	1867	LOC18792525
18769982	3250	3211	3176	4399	4464	6037	3311	3837	4047	3877	3178	3209	2506	2167	2545	2728	2172	2410	4089	4176	4330	3135	2969	2650	2618	2332	2429	2626	2044	2866	3009	3313	2755	3008	3706	2837	3650	3554	3425	4068	3668	4021	3534	3761	3718	4599	4649	4690	LOC18769982
18790596	1298	1157	1046	4600	4984	3549	4265	3332	3877	4532	4813	5293	4951	4449	5405	3997	3533	4075	4006	3351	4934	3610	3808	4224	3763	4044	4141	3889	3750	3209	3038	2998	2911	3673	2837	3093	3446	3068	3616	3200	3096	2958	1336	1793	1071	1581	1724	1363	LOC18790596
18766377	6243	6953	6737	3291	3836	5009	2994	3362	3330	4334	3288	3195	3058	2756	2673	3466	2452	2979	5699	4099	3807	3266	3175	2479	2704	2174	2246	3490	3222	4100	2304	2125	2012	4451	4310	2652	2452	2793	2801	2344	1981	2452	3085	2713	5760	2790	2678	2414	LOC18766377
18784250	3659	3770	3647	3926	3877	6814	3487	3211	3592	4428	4246	4224	3850	3099	3471	3182	2972	3539	3646	3514	3978	3377	3376	3190	3216	3194	3282	3254	2874	3138	3223	3246	2882	3080	3211	2632	3071	3121	3203	3301	3030	3389	2381	2699	2713	2741	2699	2637	LOC18784250
18773827	4350	4264	4123	2990	3063	2352	3451	3110	3455	3910	3498	3836	3800	3250	3793	3460	3282	4006	2815	2855	3261	3193	3394	3212	3160	3205	3093	3731	3124	3431	3270	3288	3076	3559	3354	3100	3336	3442	3650	3289	3106	3213	3210	3535	3380	3170	3385	3412	LOC18773827
18781994	2021	2234	2354	3982	3945	3600	4230	4139	4543	3518	3166	3016	3571	3695	3925	3457	2951	3262	3734	3945	3887	3619	3478	3756	3350	3198	3181	3211	2756	3052	2854	2902	2456	3374	4048	3891	4241	3489	3620	2983	3180	3264	2691	2354	2340	3854	3928	3841	LOC18781994
18776786	2304	2376	2699	2598	2702	2311	2515	2392	2353	3503	3233	3459	3574	3015	3020	3427	3273	3768	4397	4027	4169	3525	3983	3803	3257	3383	3314	4333	3644	3861	3569	3475	3128	4058	4720	4112	3345	4111	4298	3524	3477	3205	2568	3250	3323	3144	3344	3178	LOC18776786
18789485	2360	4636	2679	1213	1327	1186	5753	4398	3728	2418	1700	1968	7460	9833	7727	5092	4677	4929	1437	1162	1508	4886	3541	6815	2825	2607	3926	8376	7989	6388	3004	4092	4224	1879	1572	2095	4784	5120	6711	910	742	836	227	917	84	87	93	64	LOC18789485
18775502	3373	3118	3412	3377	3420	2181	2785	2538	3009	3159	2935	3437	3066	2334	2965	2619	2577	2908	3055	3018	3763	3116	3637	3062	2894	2774	2718	3404	2907	3314	3303	3538	2867	3613	3503	2981	4386	3728	4312	4306	4129	3678	3829	4527	4099	4716	4740	4826	LOC18775502
18790391	4090	4089	4036	3841	3836	3779	3567	3902	4224	4069	3183	3418	3245	2763	2818	2869	2672	3388	3725	3654	3865	3383	3430	3369	2944	2971	2979	3314	2822	3275	3559	3330	2920	3460	4032	3125	3155	2957	3029	3442	3647	3433	2743	2737	2812	3318	3342	3261	LOC18790391
18770234	3443	3386	3296	3935	4095	2314	3563	3311	3807	4345	3551	4143	3451	2650	3021	2954	3193	3632	3600	3655	3867	2893	3461	3119	2826	3062	2920	3623	3177	3290	3079	2984	2581	4923	3891	3371	2895	3894	3969	3187	3417	3358	3059	2722	3899	3111	2894	2958	LOC18770234
18792338	4377	4124	4158	3306	3241	2176	3828	3708	4025	4100	3450	3916	3701	3178	3293	3347	3098	3971	3362	3398	3530	3181	3819	3324	3028	3172	3104	3361	3001	3493	3501	3353	3073	3404	3394	2929	2905	3452	3331	3495	3331	3373	2747	2937	2847	2806	3094	2889	LOC18792338
18789349	1689	1993	1780	7494	8035	4088	3355	1827	2875	4485	6129	7154	4739	4056	5672	3786	2999	3350	7316	5421	8287	3051	2942	4184	3660	3604	3504	2623	2293	1917	2604	2783	3387	3143	2057	3228	3220	3957	4071	2204	2227	1303	621	858	547	399	369	251	LOC18789349
18769501	5458	5230	5394	4346	4134	2414	3438	3404	3902	3537	2867	3421	2620	2196	2718	2350	2246	2965	3457	3530	4419	2820	3379	2701	2548	2757	2355	2928	2557	2863	3202	3260	2886	3329	3069	2699	3751	3446	3482	3765	3539	3790	3338	3888	3499	3859	3911	3843	LOC18769501
18771365	3455	3120	3454	5105	4987	7473	3652	3929	4183	3732	3011	3372	2524	2205	2683	2519	2232	2652	3832	3949	3988	3101	3268	2991	2594	2564	2636	3124	2397	2916	2784	2707	2319	2907	2855	2475	2878	3864	4028	4475	3689	4150	3348	3731	3173	3387	3500	3584	LOC18771365
18774456	4212	4614	4877	3714	3624	5901	3681	2935	3673	4412	4681	4945	4164	3944	4207	3567	3030	3450	3612	3395	3412	3426	3498	3533	3740	3279	3596	3195	3143	3102	3087	3127	2927	3238	2643	2706	2487	2653	3039	2755	2490	2989	1774	1956	2136	2325	2231	2270	LOC18774456
18792962	4057	4121	4133	3568	3507	5071	3499	2890	3634	3878	3550	3977	3828	3295	3769	3336	3355	3907	3618	3654	3892	3528	3328	3359	3207	2984	3207	3455	2898	3299	3253	3097	2861	3392	3526	2786	3261	2945	3231	3126	3095	3129	2384	2485	2682	2663	2743	2870	LOC18792962
18781289	3198	2825	2881	3201	3213	2675	4803	4775	4539	5139	4683	4847	5080	4562	4700	3615	3425	4476	2969	2928	2674	3775	3728	3513	3452	3599	3176	3908	3283	4035	4187	3822	3971	2399	2454	2420	2517	3192	3122	3134	2680	3221	2039	1903	1956	1427	1567	1573	LOC18781289
18768375	659	471	626	7945	6972	8273	3081	4266	5093	3098	2436	2788	1238	863	1197	1283	1274	1927	5171	6227	7341	2539	3053	2249	1697	1864	1696	1900	1420	2132	4363	4638	3279	2054	2490	1644	4494	3644	3196	4539	5909	4389	4857	4992	3592	3883	4315	4056	LOC18768375
18771185	1962	1769	1958	2085	2551	1184	3788	2083	3256	2991	3446	3541	4479	4140	5386	4820	4509	4549	4083	3503	4085	4757	5621	6311	5896	5633	6303	5289	4975	3795	3723	3845	3983	3665	3308	3119	2372	3194	3435	2176	2703	2229	1235	1178	632	398	599	492	LOC18771185
18781573	4519	4816	4433	3089	3134	2811	3781	3337	3958	4299	3710	3970	4052	3578	3775	3603	3328	4048	2775	2798	2894	3029	3208	3117	3065	3110	3008	3328	3138	3312	3184	3196	2933	3280	3662	3319	3489	3233	3446	3247	3151	2984	2592	2819	2683	2998	2886	2763	LOC18781573
18789462	3405	3274	3161	2797	2885	3168	2936	3030	3299	3416	2659	3004	3250	2653	3077	3202	2778	3325	2847	2860	3515	3063	3371	3090	2798	3026	3065	3844	3463	3457	3174	3093	2884	3461	3500	2679	4566	3597	4027	3978	4055	3589	3950	4901	4188	3815	3880	3828	LOC18789462
18785468	3014	2869	2858	4233	3751	5595	3545	3888	4121	3799	3023	3314	3235	2750	3056	3049	2763	3494	3563	3625	3621	3450	3535	3080	2760	2586	2660	3306	2948	3378	3369	3253	3033	3320	3807	3084	2725	3282	3342	3798	3533	3529	2883	3237	2856	3601	3721	3616	LOC18785468
18771988	4647	4847	4580	3521	3290	4660	2962	3188	4033	3148	2445	2496	2650	2450	2215	2277	1969	2912	3113	3337	3289	2747	2984	2357	2403	2310	2007	2889	2513	3118	3215	3269	2548	3413	4294	2718	3093	3223	2968	4355	4973	3751	3837	4145	4300	5037	5007	5047	LOC18771988
18771021	1137	1162	1266	2373	2684	1228	3141	3066	2847	5337	4347	4632	4186	3585	3646	3902	3992	4489	3012	2446	3080	2523	2785	2557	3017	2857	2922	3564	2936	4113	3278	3089	2593	3097	3859	2942	3900	3845	4039	4703	4399	4507	3193	4146	4137	4099	3835	3973	LOC18771021
18791952	5409	5776	5987	2952	3186	2769	3422	2445	3072	3862	4505	4243	4294	3909	4355	3293	2973	3244	3538	3199	3523	3727	3683	3959	4131	3542	3814	3730	3512	3235	3150	3435	3277	3666	2864	2914	2698	2684	3392	2792	2570	3196	1611	1645	2059	1808	1729	1674	LOC18791952
18775467	2785	2839	2997	2688	2815	1716	2338	2058	2373	3435	2785	2717	3073	2766	2786	3450	3288	3646	5454	4025	3994	2956	3424	2837	2539	2297	2455	3733	3265	3385	2402	2367	2096	4795	4513	3392	4233	3458	4110	3236	3099	2997	3208	3632	6711	5300	4893	5039	LOC18775467
18779393	2798	3105	3156	1962	2064	2039	3396	2095	3591	2695	2356	1741	4626	5418	6714	5001	4539	4004	1491	1262	1374	3851	4120	5597	4424	4517	4480	5453	5068	4166	2058	2595	2249	4652	3253	5056	4714	3469	4479	3157	3033	2727	1835	1468	1118	2237	2854	2088	LOC18779393
18773641	1468	1140	1356	1391	1656	994	2770	1928	2195	2260	2886	3224	4179	3071	3854	3894	3351	4115	3292	2800	3388	3691	4199	3646	3799	3897	3724	4092	3657	3565	4097	4157	4113	3770	4076	3528	4250	3860	3544	4227	4637	3880	3872	4283	3721	3435	3589	3412	LOC18773641
18768981	3762	4196	3992	2482	2660	1785	2979	2701	3191	3633	3195	3647	3744	3312	3864	3482	3328	4053	3315	3169	3443	3457	3619	3469	3195	3112	3074	3603	3170	3555	3301	3134	2997	3574	3647	3179	4158	3265	3377	3455	3419	3323	3060	2955	3108	3318	3299	3156	LOC18768981
109950454	7236	6645	7200	5558	4641	5455	4421	5147	4968	5119	3233	4189	2484	2385	2397	2105	2036	2741	2528	2720	3491	2359	2986	2333	2117	2403	1941	2846	2571	2548	2545	2497	2403	2914	2538	2616	2728	2870	2791	2633	2327	2632	2368	3246	2593	3918	3785	3698	LOC109950454
18790535	3931	4025	3754	3329	3658	5122	3981	3561	3943	4558	4120	4346	4564	4266	4482	3894	3696	4326	3252	3038	3340	3416	3682	3825	3847	3538	3857	3850	3308	3661	3164	2912	2908	3506	3394	3075	3180	2679	3212	2573	2312	2515	1353	1294	1464	1336	1322	1234	LOC18790535
18783598	2860	3255	2774	3384	2998	4232	4249	3934	4126	3611	2368	3176	3336	2866	2970	3085	2751	4000	3157	3951	4077	3781	3875	3414	2499	2901	2795	3661	3147	3738	4075	3750	3200	2628	3205	2395	4163	3847	4095	3124	3333	3119	3166	3247	2843	2787	2931	2685	LOC18783598
18789491	4594	3416	6779	3708	4221	246	2940	3358	3922	1893	1310	1980	1708	1420	1049	1480	1331	3171	3807	3700	3518	4091	5136	3612	2181	2353	1878	2483	2150	3307	5540	5669	4029	4492	4191	3881	2155	4858	3609	5215	6236	5593	3601	1844	2817	3270	2688	3081	LOC18789491
18772351	3520	3140	3544	2701	2453	1451	2960	2692	3027	2748	2867	3258	3733	3165	3543	3196	2912	3675	3231	3373	3343	3208	3480	2886	2799	2732	2870	3509	3001	3315	3608	3606	3197	3350	3364	2894	3625	3359	3649	3564	3477	3221	3246	3915	3778	5041	5152	5071	LOC18772351
18772518	2238	1515	2023	12236	13738	8750	4087	4302	4404	4169	4084	4466	3728	2792	3236	2635	2915	3558	5866	5851	5863	3517	3195	4006	2108	2977	2511	2680	2171	2654	2828	2402	2394	1781	2288	2726	2141	3043	2691	2028	1945	1726	551	491	511	544	499	416	LOC18772518
18781072	3548	3775	3797	3293	3316	4741	3482	3280	3981	3469	2970	3248	3439	2959	3477	3242	3081	3511	2987	2912	3006	2987	3239	3019	2611	2626	2730	3231	2765	3150	3242	3143	2761	3311	3948	3245	3539	3504	3444	3667	3707	3392	3006	3235	2992	3615	3710	3716	LOC18781072
18776398	1898	1913	1937	3293	3383	3899	4040	3964	3955	4450	3448	3688	3907	3482	3409	3585	3186	4088	3239	2946	3148	3758	3742	3653	3073	3364	3308	4209	3684	3966	3743	3327	3446	3173	3791	3483	3577	3451	3407	3253	3097	2942	2315	2817	2420	2328	2451	2346	LOC18776398
18783955	3363	3919	3972	3754	3521	3375	3451	3297	3546	3169	2952	3141	3291	3142	3217	3264	2579	3394	3141	3232	3431	3114	3168	3082	2776	2466	2472	2950	2659	2799	2801	2895	2434	2976	3079	2895	3072	3097	3274	3834	3657	3688	3620	4060	3674	4829	4631	4723	LOC18783955
18767238	4638	4816	4610	3144	3188	5015	3329	2836	3416	3469	3193	3240	3307	2879	3162	3101	2885	3644	2909	2881	3440	2919	2903	2920	2816	2721	2561	3207	2741	3130	3109	2963	2871	3262	3213	2551	4592	3264	3441	3591	3477	3453	3361	3520	3499	3038	3367	3274	LOC18767238
18792186	138	117	150	1878	2052	787	1773	1121	1849	2146	1586	2047	1646	1995	2556	2452	2050	1742	2845	2286	2539	1481	1921	1833	2443	2728	2476	5100	4582	4702	2945	3343	3101	3931	3593	4532	3156	7951	8093	7249	8258	4606	6305	11109	5150	4289	4349	3816	LOC18792186
18779064	4511	5136	5267	2788	3223	943	3760	2610	3598	4038	4248	4042	4806	4631	4992	3961	3714	3764	3414	3068	3138	3625	3613	4309	4635	3909	4114	4134	4026	3623	3166	3195	3341	3886	2912	3333	2438	2560	3443	1955	1965	2085	1205	1477	1452	1429	1560	1473	LOC18779064
18788999	5827	5655	5827	2493	2783	971	3309	2311	3102	3415	3628	3547	4363	4231	4709	3776	3768	4075	3098	2617	2933	3267	3584	3641	3485	3452	3454	4153	3648	3638	3311	3254	3297	3375	3132	3318	2891	3454	3522	2836	2460	2846	1975	1926	2193	2037	2030	1887	LOC18788999
18788728	3702	3419	3684	3904	3635	2763	3923	4030	4125	3886	3535	4059	3304	2635	2801	2968	2547	3568	3605	3699	4244	3685	3989	3144	3018	3033	2873	3301	2802	3328	3593	3418	3097	3314	3516	2930	3372	3132	3121	3403	3293	3679	2499	2651	2440	2474	2689	2560	LOC18788728
18769916	3778	3846	3690	2790	3302	2426	2993	2367	2971	3406	3515	3369	4205	3442	4064	3747	3539	3985	3725	3061	3326	3479	3636	3677	3603	3251	3477	4224	3695	3851	3365	3091	3162	4127	3964	3232	3685	3517	4017	2740	2709	2923	1954	2227	2799	2158	2086	2144	LOC18769916
18773411	4102	3906	4200	2444	2625	2508	3520	3193	3726	3442	3016	3361	3905	3815	3669	4234	4007	4974	3069	2560	2782	3295	3625	3186	3279	3301	3174	3991	3547	3889	3633	3355	3168	3620	3745	3388	3583	3154	3281	2943	2684	2687	2301	2273	2280	2681	2505	2676	LOC18773411
18769229	3605	3256	3365	2531	2754	1608	2906	2704	3183	3364	2741	3259	3429	2793	3150	3012	3130	3875	2548	2652	2817	3067	3586	3070	2851	3124	3072	3453	2993	3150	3317	3265	2915	3883	3657	3184	3211	3974	3960	4130	4203	3965	3692	4057	3969	3689	4102	4054	LOC18769229
18772968	2369	2142	2056	3228	3131	3821	3133	3150	3442	3144	2683	2759	2934	2594	2920	2964	2705	3242	2864	3226	3515	3043	3283	2937	2552	2702	2605	2962	2387	3121	3086	3283	2519	3110	3643	3057	4519	3583	3524	4247	4303	3925	3934	4282	3980	5180	5347	5061	LOC18772968
18771247	2179	2155	2178	3088	2945	3711	3352	3329	3820	3679	2864	3010	3099	2565	2758	2912	2747	3433	2845	2989	3172	3196	3380	3050	2765	2922	2865	3355	2880	3384	3622	3542	3172	3352	3723	3062	4087	3844	3783	3902	4196	3575	3625	4146	3666	4066	3991	4114	LOC18771247
18775214	2830	2284	2421	2913	2730	3435	2817	3040	3021	2154	1886	1600	2326	2217	2086	2038	2104	3152	2825	2500	3498	3324	3911	2788	1936	2781	2001	3135	2441	3511	5148	5310	3779	2665	3025	2092	4916	4115	3964	5108	6728	4796	6541	5530	4787	3183	3205	3438	LOC18775214
18778527	3698	3498	3651	3069	2949	3120	3282	3096	3431	3355	2761	3369	3460	2769	3041	3118	3030	3634	2698	2813	2715	2983	2970	2788	2545	2686	2615	3132	2529	2894	3029	3108	2597	3247	3310	2814	2856	3458	3722	3954	3996	3843	3991	4337	4125	4411	4766	4675	LOC18778527
18790702	3149	3416	3109	2359	2705	2045	2977	2185	2831	3574	3225	3383	4155	3656	3975	3745	3584	3802	2812	2442	2891	3203	3547	3708	3491	3548	3647	4282	3840	3677	3364	3265	3113	4439	3970	3661	4500	3955	4235	3072	2980	3046	2415	2590	3048	2433	2426	2348	LOC18790702
18788253	2428	2277	2448	2681	2962	3939	2825	2945	3288	3527	3037	3470	3241	2528	2645	3018	3090	3718	3039	2891	2904	2931	3255	2817	2470	2793	2632	3286	2746	3173	3429	3321	2584	3576	3627	3009	3756	3774	3655	4064	4316	3931	3718	4131	4303	4414	4624	4431	LOC18788253
18793298	289	214	230	1730	1788	887	3566	3002	3516	2821	2269	2372	3476	3231	3414	4042	3450	4881	2544	2091	2275	4556	5299	3940	3847	4090	3513	4518	3619	4044	3565	3550	3020	4690	4881	4157	3535	3320	3396	3779	2961	3389	2578	3590	2621	4796	5212	4893	LOC18793298
18782457	3423	3902	3920	3019	3356	2449	3709	2749	3495	4142	5038	4785	4474	4113	4432	3345	3100	3183	3421	3229	3857	3475	3560	3888	4206	3530	3908	3686	3378	3340	3120	3012	2992	3331	2811	2705	4137	2681	3403	2708	2360	2753	1621	1855	1900	1977	2003	1905	LOC18782457
18789727	5595	4794	6168	5119	5547	2729	3840	3930	4137	5219	3867	5319	2736	2716	2614	1889	1925	2689	3342	3585	3999	2445	2387	2775	2416	2869	2418	2213	1947	2097	2717	2381	2643	1931	2148	1824	2855	3341	3116	4743	4090	3648	2190	4239	2877	3087	3235	2957	LOC18789727
18776365	235	221	246	8497	7626	8254	1838	1646	1974	4094	4871	5477	1958	1395	2333	1302	1325	1409	7386	7584	9025	2921	2747	2756	2274	2345	2571	1907	1377	1580	1422	1520	1556	2176	2528	2548	2303	2929	3131	4798	4014	4671	3862	3760	4290	4003	4463	4101	LOC18776365
18784883	3759	3758	3742	3878	3558	3790	2890	2749	3118	3079	2685	3278	2687	2206	2535	2502	2361	3124	3614	3611	3938	2904	3214	2529	2338	2430	2207	2947	2452	2911	3022	2975	2458	3117	3432	2564	3706	3623	3665	3880	4010	3848	4525	4203	4342	4392	4315	4346	LOC18784883
18778996	5551	5470	5364	2634	2847	2363	3508	2960	3642	3663	3330	3751	4028	3725	3971	3554	3432	4077	2988	2836	2975	3172	3537	3338	3119	3221	3166	3459	3057	3382	3233	3111	2969	3312	3121	3184	3306	3181	3304	2987	2917	2781	2333	2401	2309	2165	2178	2276	LOC18778996
18783786	3039	2563	2587	6255	5715	7468	3593	4291	4769	3778	2695	3364	2092	1635	2062	2006	1662	2238	3578	3935	4864	2770	3106	2320	2072	2074	1929	2395	1946	2326	3106	2955	2714	2567	2719	2136	3269	3256	3192	3843	4097	3777	4263	4460	3690	3997	3881	4099	LOC18783786
18766703	2770	2901	2777	5375	4854	14694	3172	3640	3893	2890	1853	2000	1773	1257	1609	1542	1517	1979	3035	3435	3797	2597	2737	2012	1599	1669	1497	2021	1556	2189	2921	3083	2201	2505	3160	1935	3123	3026	2782	3868	4503	4030	6252	4876	5100	5163	4981	4923	LOC18766703
18775966	3461	3277	3399	3169	3136	3610	3367	2768	3507	3801	3645	3896	3532	3066	3643	3015	3107	3564	3063	3118	3168	3061	3364	3201	3098	3157	3150	3368	3000	3031	3198	3178	2981	3289	3432	3001	3470	3273	3557	3373	3584	3461	2851	2947	3161	3068	3179	3308	LOC18775966
18787335	4215	3414	3795	5210	5170	4315	2769	2722	2669	3965	3818	4551	2312	1618	2500	1769	1586	2629	8370	8086	11380	3389	3623	3432	2123	2130	2125	2172	1692	2174	2686	2538	2245	2389	3234	2802	3358	3375	2989	3170	2995	3200	2440	1749	1823	2038	2043	2169	LOC18787335
18772640	4097	3982	3960	2890	3229	4444	3507	3210	3680	4270	3581	3772	3635	3076	3601	3227	3220	3675	2440	2180	2860	2844	3067	2927	2911	2966	2965	3538	3114	3181	3223	3322	3123	3255	3082	2847	3673	3182	3379	3415	3298	3462	2767	2801	3070	2927	3033	2999	LOC18772640
18791610	903	459	966	3058	3767	699	4306	3711	5134	5693	5291	6939	3435	2788	2232	2341	3096	6060	3453	3429	4499	4032	6842	4042	2530	3342	2156	2650	2251	2657	4569	4400	3447	3894	4086	2674	2781	3065	2626	3011	4949	4570	3448	1366	1726	1141	1265	1080	LOC18791610
18793895	3998	3803	3474	2813	2597	2201	3021	2606	3436	2278	2389	2218	2988	3834	4024	3649	3196	3021	1925	1727	1897	3952	3791	4993	3144	3932	4102	4756	4316	4393	3108	3125	3081	3027	3276	3705	4218	4557	4786	4355	3956	3247	2511	3768	1691	1835	2124	1840	LOC18793895
18768065	3375	3069	3158	3019	3172	1999	3494	2793	3419	3715	3654	3683	3880	3249	3853	3262	3252	3791	3249	2980	3431	3467	3615	3603	3406	3374	3427	3585	3167	3430	3310	3304	2982	3611	3426	3135	3477	3308	3881	3255	3115	3137	2522	2779	2815	2673	2729	2643	LOC18768065
18789271	3835	3939	3595	3415	3466	4251	4077	3162	4037	4208	4151	3987	4088	3786	4477	3732	3319	3706	3169	2821	2907	3163	3160	3683	3374	3448	3514	3732	3332	3438	3307	3056	2911	3331	3186	2967	2960	2958	3516	2749	2694	2640	1889	1971	1998	1790	1903	1848	LOC18789271
18775200	4119	4108	4197	3016	3168	4957	3416	2992	3365	3675	3447	3318	3646	3321	3645	3396	3244	3743	3208	2901	3264	3198	3245	3299	3327	3084	3138	3476	2890	3089	3123	2994	2735	3180	3531	3029	3424	3189	3333	3276	3183	3094	2439	2729	2388	2734	2674	2684	LOC18775200
18790037	5026	4885	5002	3130	3309	3968	3586	3120	3808	3642	3542	3842	3862	3527	3815	3200	3158	3632	3849	3670	3663	3293	3440	3712	3441	3324	3235	3028	3103	3130	2921	2884	2711	3288	3146	2899	2724	2893	3090	3013	2788	2892	2014	2074	2045	2010	2129	2167	LOC18790037
18771665	462	113	306	10139	10005	6810	3746	3615	4081	5923	5973	7765	3217	2429	3002	2676	2759	4217	6058	5754	7358	2989	3080	3190	1749	1887	1702	2163	1925	1976	3325	3274	2969	1894	1710	1875	3266	4915	4462	2010	2497	1611	1218	1441	743	785	833	577	LOC18771665
18784455	4223	4108	3984	3570	3502	2245	3332	3136	3661	3745	3201	3676	3291	2873	3331	2983	2922	3760	2781	2590	3391	2844	3069	2785	2666	2878	2628	3422	2806	3026	3184	3189	2928	3211	3042	2752	3915	3495	3466	3531	3339	3299	3271	3527	3453	3364	3524	3320	LOC18784455
18774332	3755	4199	3663	2801	2944	3466	3983	3291	3423	3695	2990	3106	3469	3207	3268	3802	3281	4182	4113	4349	4237	3745	4049	3763	2871	3270	3032	4060	3545	3852	3465	3254	3028	3144	3467	2809	3441	3121	3461	2699	2526	2433	2084	2102	1790	1931	1951	2003	LOC18774332
18776907	2790	2556	2715	3224	3052	1527	3383	3069	3457	3708	2941	3888	3099	2741	3165	3009	3062	3864	3243	3121	3561	3279	3940	3277	2857	3355	3004	3524	2996	3420	3557	3391	3149	3711	3496	3056	3148	3936	3991	3720	3787	3530	3455	3160	3080	2986	3145	2966	LOC18776907
18779086	1134	1202	1101	3712	3360	2696	2435	2753	2842	3190	2244	2988	1612	1392	1805	1727	1675	2036	3483	3595	3857	2594	2441	2518	2127	2230	2231	2827	2145	2454	2882	3194	2758	2682	3256	2678	4100	4813	4913	5805	5588	4861	5653	7210	5445	5668	6140	5906	LOC18779086
18778549	2141	4266	2743	1150	1297	1628	4816	3315	3171	2144	1824	2003	7162	8732	6715	5253	4804	5185	1664	1463	1608	4540	3805	6625	2838	3140	4350	7245	6715	5827	2968	3934	3955	2021	1794	2060	3161	5031	6101	1061	902	1039	605	1136	483	411	460	401	LOC18778549
18780474	4403	3949	3832	4375	4204	6425	3066	3445	3386	4082	3240	3165	3145	2598	3046	2987	2511	3098	3283	3289	4140	3334	3496	2926	2662	2439	2459	2736	2442	2977	3137	3025	3023	3006	3281	2349	3688	2881	2899	3260	3341	3280	2439	2766	2423	3118	3345	3188	LOC18780474
18792833	1398	1260	1277	2484	2996	1656	2916	1893	2809	3194	3966	4266	3970	3923	4587	4087	3630	3668	3960	3153	4255	3216	3941	3969	4389	4538	5393	4587	4488	4013	4190	3838	3665	4394	3333	3073	3499	3595	4117	2946	3244	3400	1692	1475	1515	1178	1230	1180	LOC18792833
18776744	7498	6337	6472	3732	3979	3469	2764	2807	2867	2722	2054	2408	2505	2063	2180	2123	2064	2385	3101	3334	4305	2846	3450	2363	2096	2482	2006	2630	2259	2898	3562	3258	3176	2897	3206	2378	3790	3114	3087	3910	3757	3633	3640	4463	3809	3105	3290	2985	LOC18776744
18773091	3249	3025	3424	4279	3971	2895	3495	3076	3482	3485	3381	3471	3483	3042	3176	3105	2655	3362	3714	3852	4307	3416	3556	3036	2919	2515	2812	2946	2856	2939	3503	3238	3067	3063	2885	2487	2576	2853	3148	3613	3420	3572	2740	3147	2858	3334	3412	3375	LOC18773091
18767777	4076	3437	3414	2869	3030	4171	2852	2343	2882	3219	2867	3606	3148	2439	3037	2688	2873	3453	3380	3314	4541	2554	3116	2691	2419	2778	2363	3066	2525	2911	3218	3010	2861	3295	3421	2614	3688	3788	3580	3956	4139	3844	4207	4269	4611	2777	2988	2712	LOC18767777
18772432	890	522	786	1649	2180	442	3794	2343	3329	2791	3956	3699	4664	3964	4055	3840	3474	4386	3446	3062	4286	3803	4182	3821	3843	4025	3308	3486	3621	2998	3996	3919	3957	3043	3319	3363	4556	3539	3363	3944	4375	4582	2854	2533	2599	2029	2323	2039	LOC18772432
18769496	3148	3085	2801	2566	2542	2876	2870	2367	2892	3610	3323	3713	3731	2667	3371	3039	3116	3755	2966	2876	3362	2750	3232	2710	2849	2779	2810	3194	2844	2850	3368	3387	2896	3025	3030	2506	3740	3771	3885	3909	4034	4215	3723	3976	4222	3505	3577	3512	LOC18769496
18784073	3430	3357	3528	2831	2917	1869	3120	2661	3311	3716	3813	3956	4199	3729	4081	3664	3396	3820	2927	2843	3325	3463	3561	3544	3610	3599	3694	3834	3528	3341	3497	3577	3204	3479	3168	3088	3377	2999	3577	3060	2757	3063	2106	2369	2361	2090	2212	2197	LOC18784073
18778648	3477	3360	3470	3337	3303	2238	3060	2932	3188	3314	2846	3290	3330	2665	3054	2771	2666	3319	2806	2862	3320	2774	3198	2671	2644	2608	2498	3135	2619	2875	3139	3343	2919	3330	3111	2745	3052	3259	3776	3729	3754	3749	3707	3948	3961	4555	4659	4482	LOC18778648
18782125	1180	1072	1081	1741	1783	1198	3693	3432	3948	2889	2148	2326	3658	3225	3278	3755	3459	4543	2734	2457	2782	3733	4318	3292	3141	3403	3246	3939	3536	4082	3690	3186	3201	4066	4552	3291	3486	2934	3093	3601	3446	3335	2834	3385	2927	5075	4561	4997	LOC18782125
18775224	3456	3242	3591	2959	3066	2440	3585	3171	3432	3823	3322	3569	3945	3571	3792	3602	3320	4043	3048	2992	3064	3314	3616	3340	3060	3201	2954	3671	3072	3291	3192	3159	2762	3122	3301	3073	3087	3207	3488	3305	3386	3049	2476	2711	2564	2739	2817	2589	LOC18775224
18792866	497	440	440	3071	3274	3755	3498	3493	4300	3386	2860	3218	2659	2233	2605	2521	2625	2899	3152	2987	3661	2861	2962	2879	2635	3323	3007	3525	2856	3319	3123	3033	2675	2918	3805	3183	4348	3926	4296	4888	4461	4301	3559	4483	3369	4301	4587	4370	LOC18792866
18788030	3949	4204	4027	2602	2719	1970	3665	2608	3318	3666	3552	3595	4343	4110	4684	4215	3914	4200	3078	2781	3058	3333	3570	3812	3702	3622	3870	4075	3531	3377	3227	3230	2954	3786	3244	3158	3714	2994	3646	2370	2244	2335	1678	1793	1781	1605	1830	1642	LOC18788030
18791798	9592	10093	9744	3794	3630	3357	3249	3444	3629	3669	2469	2921	2921	2229	2188	2811	2722	3889	2799	2902	2781	2929	3299	2509	1651	1773	1531	2378	1994	2378	2632	2303	2022	2730	3173	2172	2817	2876	2708	2531	2489	2465	2699	2325	3032	3454	3170	3495	LOC18791798
18789499	4229	4323	4066	3376	3538	3263	3599	3171	3532	3716	3270	3529	3918	3701	4158	3480	3029	3513	3219	3073	3344	3411	3595	3590	3277	3207	3372	3802	3469	3506	3229	3105	2870	3424	3262	2939	3579	3012	3555	2686	2609	2610	1876	2038	1931	1664	1691	1690	LOC18789499
18770152	3096	3188	3109	3665	3621	8189	3522	3777	4368	3787	2956	3355	2624	2325	2498	2520	2274	3020	3006	3282	3242	3326	3431	3085	2525	2602	2643	2580	2100	2505	3211	2963	2301	2860	3536	2965	2722	3156	2972	3648	3640	3630	3112	2663	2906	3654	3927	3913	LOC18770152
18778613	47052	49944	49336	439	602	197	245	181	172	222	353	561	297	308	247	117	126	167	216	254	184	109	93	126	78	43	66	181	173	160	192	233	231	45	41	41	199	274	295	21	37	24	25	17	27	14	6	13	LOC18778613
18782309	3262	3391	3385	2860	2873	2035	3334	2884	3469	3667	3367	3608	4072	3756	4005	3760	3402	4011	3081	2864	3205	3487	3539	3710	3520	3438	3612	3807	3416	3564	3133	3163	2989	3497	3521	3243	3483	3195	3410	2934	2871	2826	2086	2263	2193	2088	2388	2138	LOC18782309
109949169	4644	4545	4355	2461	2549	2509	3251	2660	3151	3524	3380	3358	4428	4153	4533	4343	3878	4579	2775	2673	2550	3367	3541	3427	3438	3420	3252	3911	3431	3655	3464	3358	2958	3462	3274	2767	3073	3118	3419	2566	2333	2556	1782	1957	1862	1951	2067	1982	LOC109949169
18773751	3513	3819	4017	3310	3489	4325	3438	3007	3308	4119	4192	4446	4025	3573	3919	3316	2916	3400	3075	3073	3203	3100	3086	3085	2933	2914	3094	3124	2760	2961	2841	3008	2831	2941	2880	2704	3362	2775	3211	2898	2604	3033	2126	2511	2515	2875	2889	2932	LOC18773751
18790115	3624	3931	4052	3545	3589	1789	3410	2802	3368	2605	2490	2611	3144	2587	2611	3089	2652	3306	3304	2807	2899	3292	3442	2928	2489	2385	2194	3219	2994	3433	3591	3444	3154	3692	3676	2748	3308	3431	3653	3277	3397	3242	3905	3933	4587	3065	3459	3310	LOC18790115
18787437	131	221	168	2768	3650	1417	4961	2779	4115	4220	5449	4579	3551	3574	3682	3331	3264	3514	3810	3113	3854	4418	5077	4956	4365	4536	4230	4085	3815	3348	2734	2654	3105	2974	3870	3933	4096	3399	3766	2882	3398	3509	2372	1715	1384	843	977	757	LOC18787437
18767729	3925	3968	3915	3313	3284	1875	3103	2972	3397	3536	2700	3397	2809	2238	2502	2530	2528	3204	2622	2632	3218	2509	3072	2625	2415	2637	2592	3211	2476	3083	3351	3277	2903	3491	3460	2757	3644	3712	3708	3628	3745	3703	4109	4120	4189	3842	3763	3649	LOC18767729
18777051	2844	2748	2596	5492	5158	4943	2319	2573	2609	3710	3045	3639	1672	1345	1742	1697	1421	2011	4412	4387	5598	1856	2124	1885	1634	1700	1506	2069	1727	2072	3267	3677	3005	1606	2228	1866	4436	4613	4244	4238	4899	3681	5732	6201	5197	3754	4403	3716	LOC18777051
18792737	3893	3790	3795	2574	2851	2437	3240	2494	3170	3284	3302	3805	4007	3291	3895	3400	3479	3783	2794	2423	3138	3006	3547	3216	2945	3434	3248	3850	3278	3260	3290	3248	3071	3822	3342	3122	3824	3725	4183	3412	3016	3044	2505	2790	2663	1798	1908	1794	LOC18792737
18784485	2428	2489	2454	3092	3197	4237	3042	2843	3184	3217	2666	2901	3093	2585	2951	2841	2666	3224	3162	3117	3417	2953	3256	3120	2707	2947	2718	3547	2848	3212	3371	3127	2957	3211	3653	2995	4279	3591	3701	3708	3852	3394	3310	3874	3452	3459	3667	3409	LOC18784485
18785915	12271	13448	14140	2939	3173	1080	2109	2310	1954	2621	2426	2777	2377	2343	2484	1858	2108	2001	1916	1589	1884	1993	1816	2321	2382	2496	2360	2792	2383	2461	2635	2725	2510	2549	2519	2827	4488	4232	4739	4179	3567	3531	1343	1893	2288	2135	2002	2137	LOC18785915
18784898	2440	2425	2210	4024	3793	6807	2634	3230	3339	3125	2322	2662	2339	1896	2239	2299	2246	2569	3151	3556	4054	2866	3049	2490	2143	2437	2287	2505	2088	2679	3200	3420	2728	2691	3242	2538	4282	3556	3602	4373	4884	4544	3678	3790	3584	4266	4301	4296	LOC18784898
18770910	2723	2196	2424	3587	3698	3668	3231	3554	3726	3834	3093	3404	2872	2315	2764	2692	2641	2814	3243	3459	3646	2842	2908	2398	2580	2556	2464	2758	2279	2828	3303	3223	3047	2767	3118	2414	3368	3582	3520	4152	4093	4132	3540	4106	3725	3766	4003	3743	LOC18770910
18780927	3861	3816	3886	3096	3415	3541	3205	2665	3238	3655	3485	3502	3234	2877	3168	2720	2513	3079	2996	3065	3614	3158	3296	3217	3375	3230	3240	3423	3237	3271	3472	3349	3005	3294	3309	2765	3462	3063	3469	3227	2888	3020	2495	2790	2856	2607	2789	2692	LOC18780927
109948158	4164	3711	3374	6024	5204	8021	5552	6126	7190	4398	2922	3125	1712	2112	1629	2787	2141	2522	2545	3125	2984	2959	2539	2534	1716	2192	1694	2812	2756	2570	2541	2625	1989	2818	3705	3871	1899	2129	2347	2244	2047	1980	1497	1934	1241	4915	4661	5002	LOC109948158
18783996	5458	5943	6137	2829	2836	1832	3013	2761	3298	3489	3030	3485	3454	2912	3220	2829	2543	3262	2987	2957	2874	3181	3595	2896	2972	2682	2760	3117	2737	2959	3155	3133	2810	3316	3243	2598	2599	3080	3230	3554	3300	3554	2868	2715	2921	2706	2902	2847	LOC18783996
18771344	2659	2669	2933	2980	2897	1905	3375	2652	3393	3072	2881	3009	3264	3302	3425	3276	2811	3362	3382	3214	3613	3451	3579	3422	3097	3040	3188	3710	3094	3458	3497	3380	3094	3107	3411	3044	3345	3355	3384	3362	3346	3301	2794	3168	2859	3129	3422	3282	LOC18771344
18772520	4298	3720	3922	3024	3096	3419	3280	2840	3283	3732	3101	3692	3197	2565	3067	2826	2898	3392	2735	2835	3299	2634	3280	2748	2678	2819	2598	2974	2402	2992	3096	3010	2490	3230	2970	2532	3374	3262	3592	3631	3699	3333	3524	3629	3668	3062	3338	3460	LOC18772520
18771548	196	119	188	1748	1827	782	2744	1748	2441	1902	1908	2832	3699	3273	3465	3788	3323	4674	3464	3317	4279	3860	4420	3669	3876	4263	3858	3903	3803	3547	4840	4832	4388	3778	3312	3046	4221	3992	3690	4951	6235	4807	3318	2710	2526	1382	1587	1692	LOC18771548
18791899	2219	2257	2130	4254	3883	4144	3240	3495	3740	3423	2592	3130	2600	2203	2404	2137	2079	2653	3127	3215	3773	3101	3422	2569	2196	2573	2351	2744	2205	2741	3581	3188	2915	2561	3063	2458	4345	3916	3726	4024	4054	3837	3995	4081	3276	4121	4215	4186	LOC18791899
18793463	2175	2079	2147	2103	2242	1867	3302	2598	3029	3447	3096	3274	3985	3393	3504	3263	3363	3786	3048	2745	3410	3341	3817	3702	3379	3499	3587	3933	3423	3558	3443	3255	3347	3342	3517	3101	4165	3617	3721	3516	3668	3798	2621	2702	2730	2450	2453	2475	LOC18793463
18769386	4497	4564	4512	2937	2890	3163	3541	3085	3380	3377	3172	3299	3698	3561	3789	3431	3283	3739	2978	2980	3083	3198	3211	3470	3225	3173	3172	3709	3267	3373	2989	3133	2864	3238	3161	3279	2917	2985	3251	2753	2660	2706	2018	2395	2055	2210	2382	2232	LOC18769386
18771680	3282	3657	3670	4205	3996	5497	3320	3105	3613	4513	3710	3675	3252	2962	3284	3285	2751	3194	3397	3294	4126	3090	3051	2915	2608	2515	2705	3078	2535	2816	2741	2698	2520	3021	3418	2389	4916	2998	3274	3003	2917	2502	2225	2768	2290	2369	2623	2166	LOC18771680
18785670	10115	7005	7669	3274	2449	4091	2404	2228	2518	1669	839	953	2953	2815	2631	5400	5486	6528	434	537	470	504	664	427	269	392	294	954	758	924	964	897	999	352	355	289	538	438	510	533	453	549	3119	4077	3663	18050	19510	18961	LOC18785670
18779650	5891	5769	6386	2652	2934	2700	3349	2444	3344	3285	3490	3722	4252	3918	4399	4114	3648	4228	3081	2790	2662	3343	3721	3713	3459	3602	3597	3679	3367	2864	2913	2998	2689	3084	2869	2766	2072	2628	2990	2217	2117	2097	1485	1576	1726	1713	1852	1648	LOC18779650
18791788	2654	2443	2400	3031	3145	3736	3306	2706	3517	3257	2846	2944	3143	2901	3140	3004	2887	3443	2986	2976	3439	2942	3497	3190	2966	3196	3087	3988	3183	3609	3768	3670	3823	3072	3238	2822	4359	3777	3865	3282	3319	3216	2774	3252	2587	2503	2451	2482	LOC18791788
18778521	1847	1552	1646	3218	3076	3749	3651	3650	4278	2969	3139	3408	3554	2744	2902	2816	2647	4230	3102	3145	3650	4631	5265	3889	3013	3400	2729	3091	2651	3369	5805	5306	4228	3077	3589	2788	4026	3346	3081	3419	3625	3486	1825	1442	1574	1351	1395	1388	LOC18778521
18770899	1715	1479	1768	2309	2501	930	4079	3395	3925	3555	4012	4201	4378	3723	3804	4222	3860	4649	3156	2872	2790	3338	3807	3354	3555	3126	2954	2914	2826	3275	3756	3788	3014	4067	4131	3635	2426	3369	3312	2917	2812	2968	1988	1670	2144	2870	3141	3262	LOC18770899
18788642	3946	3984	4067	2806	3046	2346	3111	2699	2895	3020	2896	3098	3332	2856	3294	3181	2745	3308	3157	2708	3583	3140	3571	3158	3181	3044	2921	3313	3053	3070	3203	3291	3044	3329	3379	3131	4385	3404	3590	3496	3389	3364	2430	2774	2543	2766	2870	2808	LOC18788642
18784558	4861	5006	4399	3254	3304	3615	3317	3129	3348	3974	3614	3755	3563	3137	3423	3126	3010	3324	3436	3110	3243	3269	3224	3062	3145	3119	2946	3104	2914	3141	3056	2868	2682	3174	3252	2900	2671	2844	3069	2900	2605	2917	2083	2307	2376	2251	2564	2256	LOC18784558
18784457	2781	3204	3133	3561	3944	3593	3702	2868	3695	3356	3622	3786	3317	3338	3501	3868	3202	3896	4662	3401	3471	3065	3361	3259	2872	2958	2632	3359	3207	3412	2706	2822	2587	3033	3451	3519	3360	3170	3057	2762	2926	2413	2511	2496	3352	1764	1975	1674	LOC18784457
18782742	3113	2618	3078	2861	3016	1649	2476	2299	2633	2530	2066	2607	2170	1861	2337	2244	2213	2801	3601	3806	4470	2426	2955	2334	2055	2134	2015	2538	2139	2448	2817	2929	2307	2864	3071	2353	3580	3386	3443	4124	4210	3672	4832	5684	4999	6518	6455	6815	LOC18782742
18793378	4420	4195	4304	2743	2915	1793	3241	2758	3283	3451	3257	3669	3765	3323	3362	3361	3255	3755	2794	2618	2923	2830	3347	3045	2990	3216	3202	3707	3131	3475	3241	3225	3036	3668	3470	2918	3359	3417	3296	3061	2773	2836	2436	2669	2542	2363	2455	2411	LOC18793378
18788053	4283	3872	4078	3364	3401	2129	3681	3487	4224	3492	2696	3347	3162	2975	3308	2877	2819	3404	2782	2690	2993	3006	3582	3211	2513	2792	2885	3275	2840	2804	2941	2835	2735	3260	3094	2586	2652	3325	3699	3185	3509	3263	3017	3132	2697	3144	3123	3063	LOC18788053
18781655	5515	4863	5254	6998	6540	3357	2773	2484	2767	4407	5309	5813	2650	1688	2708	1921	1678	2430	10773	10233	15646	3034	3048	2826	1825	1795	1824	1501	1497	1561	1880	1612	1845	1668	1845	1505	2704	1899	1666	1643	1162	1744	741	900	934	891	914	886	LOC18781655
18782993	1921	1787	1918	2240	2373	1977	3069	2624	2933	3337	2987	3183	3580	3701	3660	3668	3461	3692	2878	2521	3312	3475	3818	3949	2993	3630	3229	4226	3487	3693	3898	3667	3190	3220	3702	3580	4455	3823	4094	3577	3615	3531	2402	2516	2091	2224	2156	2061	LOC18782993
18782179	3657	3827	3769	2526	2918	1410	3336	2354	3333	3536	3708	3643	4366	4161	4797	4236	3881	3808	3010	2589	2658	3384	3363	4081	3878	3661	3612	3965	3825	3605	3056	2939	2953	3788	3148	3093	2727	2956	3913	2396	2455	2531	1645	1724	1765	1686	1752	1666	LOC18782179
18788794	3701	3760	3676	3066	3143	2751	3376	2859	3220	3963	3514	3623	3382	3217	3455	3064	2902	3257	3006	3006	3260	3103	3169	3488	3381	3381	3404	3561	3217	3291	3109	3196	2982	3392	3347	2933	3125	3020	3540	2836	2896	2956	2271	2366	2437	2404	2540	2416	LOC18788794
18777525	2709	2504	2662	3261	3223	3336	3165	2896	3176	3546	3189	3563	3297	2806	3128	3022	2732	3133	3378	3285	3850	2935	3203	2980	2867	2776	3019	3240	2914	2975	3077	3004	2762	3192	3299	2901	4141	3519	3476	3480	3438	3390	2755	2743	2835	3234	3315	3575	LOC18777525
18771370	6883	7497	7172	2704	2831	1341	2977	2501	3002	3127	2740	3149	3180	2694	2943	2805	2590	3287	2760	2703	3218	2836	2983	2761	2437	2752	2618	2953	2736	2899	2896	2721	2509	3033	3283	2777	3880	3004	3293	3118	3028	2888	2656	2817	2750	3016	2994	2875	LOC18771370
18773357	3237	3501	3669	2647	3053	1633	3889	3046	3682	4084	3866	3683	4490	4611	4845	4062	3865	4034	2823	2508	2818	3266	3377	3611	3677	3496	3700	4106	3723	3513	2892	2880	2962	3581	3110	3143	4015	2725	3517	2211	2075	2232	1360	1591	1470	1530	1465	1319	LOC18773357
18790597	2332	2721	2570	3277	3289	6273	2879	2899	2904	3265	2616	2830	2485	2230	2477	2530	2330	2740	3036	3200	3832	2937	3159	2810	2357	2583	2469	2977	2574	2668	2814	2702	2495	2917	3427	2604	4820	3687	3690	3813	3884	3391	3602	4272	3175	3916	4181	3927	LOC18790597
18785429	2225	2114	2313	3444	3408	3752	2960	3077	3251	3343	3025	3318	3018	2439	2666	2532	2264	2787	3440	3508	3835	3182	3345	2957	2810	2825	2758	2987	2535	2808	3244	3034	3079	2878	2999	2506	2744	3463	3395	4326	4218	3824	3499	4051	3466	3408	3768	3536	LOC18785429
18781647	3706	3729	3465	2752	3019	2488	3730	2783	3626	3329	3009	3074	3759	4101	4257	3718	3538	3699	2992	2774	2955	3407	3417	3701	2996	2991	3048	4064	3337	3396	2704	2706	2685	3528	3590	3485	3775	3319	3777	2792	2467	2489	1649	2157	1803	2239	2093	2228	LOC18781647
18793606	1935	1677	1659	2814	2925	2662	2585	2195	2601	2640	2242	2786	2632	2256	2792	2649	2638	2977	2508	2247	2898	2579	3120	2681	2333	2422	2480	3344	2870	3120	3299	3752	2928	2961	3408	3012	3999	4220	4234	4807	4693	3816	4215	6239	4158	4302	4421	4507	LOC18793606
18791754	3485	3615	3534	3035	3083	3897	2899	2812	3091	3927	3139	3324	3475	2860	3162	3101	2938	3447	3218	3063	3156	2972	3087	3022	2648	2669	2618	3097	2678	3094	2988	2812	2560	3337	3444	2677	3649	3336	3382	3312	3256	3136	2727	3190	3055	3087	3095	3044	LOC18791754
18789511	5769	5520	5527	2555	2696	1197	3153	2597	3077	3467	3309	3646	3583	3374	3799	3468	3138	3698	2669	2463	2887	2848	3309	2880	3171	3004	2792	3135	2915	3085	2920	3077	2746	3196	2749	2816	3202	2954	3112	2885	2626	2794	2314	2501	2559	2896	3083	2912	LOC18789511
18769191	3001	3143	3129	2995	2883	4229	3131	3043	3433	2992	2177	2598	2725	2338	2416	2746	2611	3318	3032	2897	3100	3120	3459	2877	2618	2706	2482	3460	3027	3687	3423	3429	2788	2988	3408	2723	3549	3478	3433	3582	3434	3280	3786	4044	3802	3098	3173	3112	LOC18769191
18791500	3265	3056	2984	3521	3494	3071	3363	3221	3565	3079	2836	3106	3161	2746	3005	3128	2747	3359	3084	3025	3414	3183	3318	2978	3066	2939	2714	3599	2926	3182	3402	3417	3074	3070	3470	2889	3296	3152	3427	3214	3256	3018	2649	3388	2889	2748	2751	2637	LOC18791500
18793876	2988	2987	2681	3803	3757	5436	3741	3541	4267	3406	2470	2978	3175	2801	3104	3115	3155	3744	2536	2661	2836	3066	3411	2798	2204	2567	2316	3382	2771	3193	3698	3123	3299	2948	3057	2320	3362	3113	3392	3215	2936	2897	2670	3209	2316	2899	3269	2997	LOC18793876
18785269	782	810	740	3836	3641	2310	3022	3345	3814	3235	2738	3045	2658	2078	2395	2369	2358	3135	3190	3373	3197	3035	3235	2701	2626	2615	2689	2700	2388	2631	3403	3323	2690	3114	3733	2945	2883	4173	3638	4252	4837	4403	3856	4219	3587	4553	4652	4624	LOC18785269
18790830	3048	3194	3301	3064	3148	3755	2945	2846	3033	2962	2749	2891	2826	2356	2691	2460	2394	2976	3430	3174	3756	3035	3209	2876	2519	2803	2402	2839	2575	2625	2946	2969	2487	2874	3217	2503	3864	3157	3389	3660	4089	3614	3920	3746	3889	3800	3744	3810	LOC18790830
18766217	5985	4917	5376	2561	2796	2669	3432	2794	3488	3365	3468	3608	3795	3255	3572	3480	3260	3935	2924	2677	3269	2704	2996	3023	2830	2872	2845	3593	3352	3453	3539	3315	3349	3032	3166	2675	3491	2890	3188	2274	2272	1986	1916	2318	2048	1811	1959	1828	LOC18766217
18788414	5213	5270	4730	2870	3010	2983	3081	2581	2947	3374	3511	3935	3564	3449	3627	3489	3135	3652	3166	2618	2696	3052	3292	3407	2920	3105	2977	3836	3190	3370	2892	3082	2682	3646	3280	3131	2585	3217	3821	2470	2725	2681	1901	1898	2001	1651	1782	1696	LOC18788414
18771725	2225	2266	2109	2965	3115	3981	3750	3159	3764	3842	3208	3642	3873	3147	3581	3360	3136	4066	3496	3328	4007	3700	3823	3619	2773	3067	2975	3093	2684	2875	3365	3117	2972	2967	3554	3062	3538	2966	2914	3191	3430	3134	2143	2017	2105	2012	2054	1860	LOC18771725
18766870	4156	4227	4291	2776	2869	1206	3051	2691	3108	3173	2892	3188	3394	3085	3382	3149	2912	3446	2790	2758	3324	2831	3189	3091	2807	2908	2779	3344	2882	3104	3066	2953	2819	3125	3187	2784	3801	3224	3426	3117	3173	2978	2884	3178	3025	3023	3226	3227	LOC18766870
18789278	2867	2557	2650	3288	3138	2483	3257	3031	3386	3639	2973	3525	2793	2486	2894	2568	2492	2894	2526	2435	3275	2286	2796	2622	2739	2736	2659	3110	2633	2870	2790	2820	2792	3142	3130	2820	4305	3599	3664	3795	3665	3573	3585	4279	3800	3792	3893	3710	LOC18789278
18769131	1908	1705	1675	6488	5597	8479	2854	3641	3820	2881	1841	2202	1334	1113	1277	1359	1039	1540	4267	5237	5850	2899	2842	2141	1566	1451	1419	1771	1548	1784	2718	2755	2264	2673	2866	1868	3080	2853	2531	4182	4749	4272	4717	4513	3756	5124	4970	5296	LOC18769131
18773013	5637	5461	5425	3688	3403	5076	3107	3007	3613	3340	2579	2589	3363	3425	3669	3187	3063	3511	2716	2621	3195	2905	3287	2950	2497	2480	2282	3188	3000	2938	2948	3027	2824	2901	3150	2735	3467	2585	2804	2621	2401	2505	1941	2300	1864	2500	2446	2424	LOC18773013
18778338	3629	3580	3534	2131	2151	1466	4078	3068	3329	2623	2039	2549	3755	4211	3730	3448	2975	3624	3148	3204	3642	3816	4015	4456	3217	3356	3230	4213	3949	3650	2818	3014	2881	2697	2933	3090	3674	3546	4148	2629	2603	2745	1794	2548	1832	1909	1934	1991	LOC18778338
18780861	1862	1740	1709	2180	2407	1537	3389	2438	2979	3157	3289	3572	4359	3664	4463	4070	4061	4458	2521	2394	3243	3166	3274	3625	3382	3617	3589	3910	3193	3072	3195	3116	3276	3087	3037	3035	5176	3827	4408	3257	3228	3093	2190	2777	1973	1814	1959	1813	LOC18780861
18792630	1785	1656	1635	3236	3168	3058	2799	2615	3152	2734	2645	3187	2586	2116	2734	2380	2279	2826	2618	2279	3206	2512	3141	2604	2627	2813	2553	3355	2791	2781	3661	3683	3214	3207	2846	2842	3595	4203	4496	4499	4744	3917	4235	5266	4043	3484	3588	3091	LOC18792630
18769708	2343	2118	1934	2700	2207	2582	3523	4288	4976	2619	1379	1669	1432	1440	1667	1763	1482	2009	1380	1714	1659	3220	3486	2679	2240	2860	2442	2295	1843	2402	2887	2493	2097	3345	4442	3676	4259	3219	3325	4464	4920	4582	5114	5248	3499	7046	6618	6802	LOC18769708
18777865	4546	5958	5664	3336	3882	4051	2990	1825	2873	2568	2384	1966	3094	2976	4358	3664	3345	3054	3676	2063	2333	1687	1993	2160	2276	2086	2239	4713	4132	4445	1885	2148	1951	2708	2237	2205	3743	2702	4208	1964	2340	1768	4934	3427	3785	3489	3888	2649	LOC18777865
18771963	3003	2849	2865	2320	2644	4355	2813	2580	2897	3490	3231	3402	3369	2875	3417	2763	2524	2742	2768	2576	3258	2868	2751	3000	2991	3105	2983	3547	2923	3147	2975	3033	2965	3103	3053	2881	3696	3477	3937	4200	3788	3774	2974	3398	2849	2734	2648	2718	LOC18771963
18789659	6319	6384	5998	2359	2442	1908	3026	2295	2860	3393	2975	3072	3558	3174	3484	2944	3026	3362	2242	2317	2554	2657	2919	2773	3051	2788	2843	3208	3000	3127	2911	3328	2730	3355	2912	2797	3502	2771	3189	2814	2562	2769	2425	2493	2617	2858	3083	2979	LOC18789659
18793642	3675	3569	3669	2873	3002	2540	3641	2729	3419	3455	3397	3335	3799	3505	3629	3156	3000	3399	3069	2972	2578	3492	3328	3498	3417	3296	3252	3639	3276	3257	3136	3161	2997	3374	3236	3019	1824	2993	3302	2763	2892	2925	2156	2425	2272	2227	2278	2172	LOC18793642
18777243	3246	3361	3351	2716	2930	3565	2931	2374	2776	2968	3103	3034	3741	3183	3684	3115	2906	3491	3392	3073	3408	3251	3276	3429	3235	3110	3169	3650	3253	3053	3019	2999	2799	3496	3516	3104	3382	3204	3516	3082	2992	3014	2367	2504	2263	2349	2366	2245	LOC18777243
18766945	4430	4570	4634	2755	2984	2247	3393	2723	3171	3528	3440	3372	3792	3276	3603	3172	2854	3552	3114	2947	3597	3206	3338	3234	3239	3100	3057	3383	3174	3031	2974	3016	2704	3347	3017	2925	4325	2781	3102	2662	2466	2705	1907	1892	2010	2060	2088	2035	LOC18766945
18784333	3219	3413	3301	2802	3058	3611	3473	2793	3395	3467	3544	3330	4055	3998	4291	3697	3373	3859	2818	2753	3143	3049	3279	3270	3254	3436	3270	3773	3254	3362	2881	2825	2801	3482	3180	2848	4055	2899	3562	2643	2594	2417	1738	1991	1778	1625	1728	1509	LOC18784333
18775495	2197	1511	2541	2276	2731	2314	3490	3221	3880	3429	2480	2694	4113	3420	2680	2298	3162	4697	2320	2169	2392	3281	3935	2956	2520	2994	2378	3287	2914	4285	5324	4617	4142	4710	5613	4160	2952	3657	2841	3101	3012	3282	1970	1277	2052	2235	2111	2229	LOC18775495
18790953	3489	3439	3529	2555	2702	1868	2729	2335	2738	3731	3249	3390	3513	2973	3318	3480	2958	4025	3066	2706	3114	2744	3350	2889	2912	2770	2744	3119	2914	3045	2657	2607	2284	3915	3574	3194	4109	3434	3527	3229	3131	3455	2595	2246	3077	3332	3098	2990	LOC18790953
18790383	4436	4027	4920	6160	5606	4929	4067	4171	4831	3242	3666	4052	3037	2417	3137	2484	2075	2900	3975	4601	4087	3462	3823	3233	2960	2585	2405	1790	1652	1851	3318	3214	2502	1935	2338	2218	2073	2728	2230	2542	2354	2762	1616	1221	1350	2243	2372	2250	LOC18790383
18788218	2640	2889	3075	2719	3036	2053	3344	2399	2929	4028	3674	3740	3962	3862	4020	3580	3389	3911	3032	2754	3371	2996	3152	3321	3351	3418	3271	3633	3375	3066	2943	3006	2811	3423	2851	3191	3819	3114	3380	2852	2728	2883	2003	2391	2160	2075	2214	1984	LOC18788218
18782593	3245	3423	3387	2475	2615	2428	3472	2617	3213	3388	3067	2945	3463	3535	3630	3163	3181	3588	3051	2895	2848	3291	3621	3626	3272	3284	3347	3704	3442	3622	3153	3180	2979	3418	3617	3303	3043	3084	3502	2788	2673	2693	2183	2188	2079	2302	2416	2261	LOC18782593
18778916	2794	2236	2431	2439	2471	1273	3034	2421	2930	2823	2828	2995	3286	2694	3249	3080	2722	3355	2679	2530	2826	2669	3242	2718	2702	2697	2618	3280	2749	2743	3051	3124	2595	3199	3033	2449	3031	3116	3438	3598	3695	3424	3389	4487	3881	5000	5221	5354	LOC18778916
18769780	4976	4833	4751	2894	2871	2582	3063	2604	3108	3338	2951	3304	3302	2788	3225	3029	3026	3533	3029	2867	3039	2746	3014	2688	2690	2682	2754	3022	2701	2892	3108	2919	2653	2846	2909	2601	2809	3220	3280	3161	3109	3013	2860	2815	2799	2855	3227	3012	LOC18769780
18768300	3691	3474	3892	3722	3574	1327	2613	2462	2609	3900	3285	4050	3674	2829	2967	3041	2669	3892	3793	3870	4079	3036	3513	2946	2523	2748	2433	2814	2509	2868	3544	3391	3029	2835	2890	2438	2696	3086	2977	3074	3163	3030	2680	2704	3120	2718	2663	2547	LOC18768300
18787541	2816	3039	3212	2910	2951	4111	3078	3131	3337	3210	2496	2962	2743	2461	2791	2376	2058	3164	2934	3044	3413	3181	3441	2818	2457	2594	2332	2498	2437	2564	3029	2857	2381	3043	3409	3113	3465	3020	2942	3210	3423	3137	3273	3131	3111	4763	4550	4969	LOC18787541
18772824	1427	1490	1546	2405	2738	2326	3623	2814	3354	2989	2784	3178	3395	2855	2934	2440	2482	2733	3278	3138	2637	4080	4266	4288	3531	3768	3561	4031	3427	3848	3860	3786	3347	3851	4140	3610	2316	3265	3305	3045	3140	3127	2873	2336	2565	2384	2422	2565	LOC18772824
18785448	4461	4330	4941	2624	2750	2117	3415	2824	3476	3429	3005	3004	3120	2804	2631	2587	2366	3402	3188	2803	3546	3629	4501	3789	2946	3653	2941	3182	2999	3298	3472	3197	3210	3809	4632	3617	3563	2763	2829	2918	3094	2850	1577	1402	1382	1698	1721	1739	LOC18785448
18790188	4325	4046	4186	2824	3125	1557	3313	2688	3252	3439	3352	3653	3543	3269	3509	3331	2850	3531	3305	2953	3315	3267	3702	3387	3428	3300	3381	3990	3469	3628	3582	3639	3468	3258	3260	3017	2881	2878	3098	2298	2298	2267	1827	1813	1702	1635	1735	1657	LOC18790188
18783718	1494	2062	1825	2180	2124	3502	2832	2965	3389	3455	2626	2670	2353	1966	2103	2461	2161	2868	2398	2280	2587	2755	3049	2491	2663	2577	2467	3193	2595	2935	3194	3115	2738	2902	3362	2755	4379	3451	3710	4143	4535	3725	4503	5954	4349	4456	4556	4359	LOC18783718
18792074	2410	2200	2092	3228	3135	4536	2903	2941	3160	3104	2607	3028	3148	2535	2642	2949	2485	3466	3210	3385	4026	3131	3446	2766	2347	2381	2324	2870	2367	2762	3418	3000	2827	2944	3221	2315	3570	3095	2801	3459	3759	3408	3624	3742	3161	3606	3842	3664	LOC18792074
18784769	1126	869	1092	6909	5622	8459	3127	4206	4336	3650	2623	3351	1120	792	1014	1152	1073	1792	3627	4075	4369	2380	2357	2109	1491	1564	1444	1364	1215	1449	2844	2937	2190	2306	3179	2425	3222	3553	3056	3370	3954	3435	3920	4170	3407	6631	6487	6101	LOC18784769
18793384	2265	2126	2205	3491	3342	1731	2843	2566	2780	3127	3035	3169	2732	2734	2849	2790	2362	2945	3464	3414	4203	3262	3540	3225	3246	3270	3036	3460	2861	3051	2981	3065	2686	3410	3538	3529	4156	3664	3661	3589	3302	3202	2685	3204	2779	2702	2903	2732	LOC18793384
18772966	2714	2895	2801	1795	1947	717	2357	1910	2485	2439	3156	3390	2403	1937	2308	2133	2010	2597	3741	2991	4135	3392	3747	3224	3421	2994	2908	2726	2414	2607	3303	3240	2834	2878	3137	2467	2821	3007	2965	5218	5484	5790	3922	3542	4101	3703	4071	4129	LOC18772966
18790848	790	635	778	752	835	268	2123	1361	1564	2110	2777	3246	3947	3014	2962	3728	3105	4692	2805	2767	2898	3541	3906	3389	3671	3525	3422	3660	3588	3508	4370	4349	4111	4044	3941	3555	3436	3408	3482	4183	5360	4159	3595	3149	3797	2751	3013	2835	LOC18790848
18781937	3045	2729	2830	2867	2675	2124	2592	2305	2563	2688	2659	2903	2851	2402	2807	2899	2533	2948	3078	3076	3737	2659	3043	2692	2546	2492	2400	3044	2768	3060	3102	3260	2626	2700	2894	2406	3999	3125	3376	3611	3629	3239	3336	4216	3629	4961	4789	4953	LOC18781937
18777815	3989	3697	3881	2840	2972	1777	3284	2492	3109	3402	3643	3828	3674	3486	3782	3226	2940	3613	2971	2905	3413	3013	3295	3029	3548	3138	3175	3435	3227	3204	3232	3156	3145	3400	2891	2532	2953	2839	3275	2839	2598	2844	2044	2225	2254	2071	2278	2054	LOC18777815
18767582	3178	3576	3841	3326	3424	3615	3567	2841	3368	4053	4257	4461	4104	3648	3943	3199	2734	3269	3042	3049	2930	3146	3179	3408	3663	3131	3309	3341	3150	2886	2752	2897	2854	3097	2604	2760	2872	2601	3114	2595	2342	2683	1599	1715	1821	1935	1921	1774	LOC18767582
18767499	4232	4231	4212	3710	3655	4070	3268	2970	3350	4089	3378	3768	3239	2629	2971	2542	2273	2912	3659	3410	4002	3134	3163	3104	2718	2568	2564	2856	2409	2619	2881	2753	2486	2761	2941	2432	3390	2827	2819	3187	3173	2980	2398	2505	2260	2380	2430	2197	LOC18767499
18787071	2451	2575	3071	3352	3262	4346	3558	2986	3424	4147	3916	3914	3403	3619	3691	3262	2639	2805	2510	2559	2349	3077	3093	3330	3178	3282	3123	3664	3533	3288	2547	2658	2640	2838	2967	3103	2411	3191	3341	3089	2603	2812	2080	2634	2048	2781	2760	2505	LOC18787071
18793866	3100	2846	2829	3385	3365	3231	2643	2685	3001	2860	2482	2888	2659	2065	2452	2375	2302	2786	3054	3261	3817	2628	2922	2589	2338	2545	2357	2642	2412	2712	3085	2873	2533	2905	3185	2606	3927	3278	3436	3646	3743	3414	3616	4251	3612	4117	4262	4375	LOC18793866
18776023	3678	3542	3630	2589	2770	2169	3075	2308	2825	3246	3402	3382	3698	3407	3810	3389	3002	3302	2959	2851	3571	3072	3233	3297	3474	3275	3374	3490	3391	3172	3060	3274	2978	3467	3018	2806	3709	2976	3265	2752	2442	2872	1999	2309	2388	2050	2183	2098	LOC18776023
18772801	2152	2378	2054	1913	2141	2084	2729	2463	2768	3274	2489	2697	3284	2665	3146	3019	3162	3283	2718	2210	2447	3017	3300	3102	3041	3053	3287	4278	3527	3888	3184	3311	3165	3868	4182	3384	4042	3733	4066	3379	3270	2829	2777	3386	3141	2845	2918	2951	LOC18772801
18790299	404	529	420	3858	3353	3073	2134	2657	3075	1999	1757	1825	970	736	1055	953	935	1271	2663	3219	3778	2327	2613	2228	1506	1610	1660	1652	1339	1584	2002	2459	1635	2619	3252	2590	5982	4009	4088	6031	6644	5330	6786	7539	5335	7185	7641	7582	LOC18790299
18793976	2661	2495	2480	2680	2733	2593	3035	2749	3234	3317	3078	3443	3020	2629	2982	2668	2722	3231	2803	2835	3179	2889	3175	2721	2789	2759	2897	3375	2899	3116	3200	3356	2834	3270	3131	2517	2810	3422	3383	3386	3479	3366	3336	3356	3278	3341	3606	3544	LOC18793976
18789623	4293	4422	4050	3202	3050	2845	2786	2717	3200	3406	3107	3378	3557	2804	3327	3092	2953	3590	2814	2716	3054	2593	2886	2646	2776	2688	2723	3154	2708	2913	3056	2959	2877	3071	3008	2513	3129	3041	3013	2888	3100	3041	2659	2801	2793	2631	2921	2811	LOC18789623
18772557	2643	2641	2592	4395	4072	7132	3676	4136	4212	4334	2771	3824	2022	1435	1811	1713	1528	2281	4045	4452	5028	2723	2940	2458	2047	2108	2112	2089	1653	2109	3259	2847	2341	2187	2534	1816	2518	2775	2558	3367	3858	3439	3467	3705	3652	3374	3372	3596	LOC18772557
18790061	6575	9753	10440	4527	5379	4655	1999	1015	1741	3041	2992	3077	3142	2493	3939	2707	2106	1740	5151	2741	2810	1394	1746	1940	2657	1726	1838	3444	3354	4257	1035	1077	1014	2712	1584	1656	2598	3278	4431	2188	2445	1194	4771	2511	2767	2075	2108	1803	LOC18790061
18782071	6814	8769	8355	2904	2641	3818	3576	3491	4041	3630	3042	3607	3172	2699	3012	3325	2799	3463	2414	2272	2477	2398	2503	2033	2813	2626	3257	2867	2765	2102	2484	2027	1893	3671	2251	1590	2285	2705	3292	2999	2433	2775	1281	2190	1410	2213	2150	2124	LOC18782071
18783489	4268	4276	4305	3062	3257	2615	3128	3025	3497	3410	2904	3293	3218	2655	3095	2721	2582	3393	3359	3440	3728	2939	3247	2926	2688	2743	2581	3180	2654	2922	3165	2936	2581	3242	3217	2755	3281	3132	3346	2874	2873	2777	2183	2472	2438	2287	2402	2363	LOC18783489
18786083	2291	2311	2149	3208	3094	2565	3154	3086	3432	2860	2263	2547	2594	2230	2355	2339	2331	2918	2678	2665	3185	2742	3106	2538	2202	2269	2230	2790	2296	2812	3199	3050	2648	2803	3082	2436	3297	3331	3300	4114	4597	3911	4325	4932	3952	4149	4591	4453	LOC18786083
18780959	3194	2703	2847	3012	3180	2656	2851	2695	3135	2948	2622	2857	2337	1976	2522	2252	2206	2586	2907	2817	3373	2714	2791	2487	2394	2411	2276	2465	2086	2297	2630	2800	2205	2976	3238	2772	3613	3229	3397	4273	4358	3690	3929	4537	4070	4825	4596	4509	LOC18780959
18775197	3178	2791	2954	2854	2967	3348	2981	2563	2945	3305	3155	3409	3013	2378	2764	2540	2595	3078	2656	2539	3164	2704	2944	2489	2461	2726	2639	3158	2542	2908	3232	3180	2757	3378	3116	2638	3128	3518	3597	3810	3607	3600	3488	3824	3599	2911	3036	3005	LOC18775197
18789216	3044	2861	2690	3267	3260	4035	3219	2960	3363	3175	2755	3076	2875	2500	2756	2681	2546	3008	3210	3257	3363	2972	3152	2768	2654	2791	2657	3273	2733	3092	3235	3185	2833	3383	3410	2826	2567	3217	3301	3268	3206	3013	3110	2931	3108	2702	2944	2890	LOC18789216
18772225	3700	3356	3332	2821	2674	3392	2429	2211	2587	2955	2470	2922	2522	1987	2471	2433	2371	2656	2627	2396	3142	2458	2687	2325	2114	2211	2337	2606	2215	2450	2677	2749	2386	2922	3069	2320	3678	3620	3690	4237	4253	3974	4501	4859	4698	4020	4169	4400	LOC18772225
18793964	4017	3831	3762	2815	2698	2081	2831	2597	3096	3043	2831	3203	3562	2961	3256	3437	3309	3918	2795	2724	2839	2937	3287	3043	2843	2946	2855	3056	2856	3112	3323	3255	2954	3323	3624	2916	3037	2972	2906	2970	3029	2927	1985	2206	2184	2845	2994	2983	LOC18793964
18773343	2793	2634	2529	2833	2766	2326	3074	2780	3075	3400	2696	2931	3126	2621	3067	2885	2980	3454	2575	2410	2790	2890	3362	3170	3066	3091	2996	3430	2856	3201	2979	3119	2732	3268	3754	3219	3563	3287	3212	3293	3138	3203	2513	3190	2822	3107	3177	3278	LOC18773343
18790464	2706	3067	2989	3512	3423	4321	3040	2987	3084	2972	2420	2638	2670	2465	2607	2420	2201	2849	2836	3073	3713	2988	2876	2602	2354	2414	2364	2669	2452	2739	2805	2877	2390	2993	3246	2876	4502	3235	3360	3678	3602	3532	3317	3441	3089	3495	3424	3272	LOC18790464
18766536	2625	2573	2599	3237	3248	3712	3014	3143	3375	3834	3011	3130	2917	2452	2873	2835	2617	3013	2717	2665	3027	2942	3112	2687	2734	2741	2604	3198	2633	3156	2868	2842	2541	3006	3326	2704	3006	3297	3376	3745	3805	3433	2885	3207	2918	2932	3207	3041	LOC18766536
18776190	4210	4310	4298	2279	2612	1213	2893	2281	2787	2906	3047	3301	3889	3515	3979	3542	3307	3901	3305	2920	3215	3082	3438	3541	3241	3140	3378	3574	3220	2992	2899	2732	2833	3399	3337	2888	2962	2883	3282	2455	2341	2505	2064	2060	2108	2079	2207	2150	LOC18776190
18789161	3864	3579	3728	2937	3072	1894	3221	2893	3546	3415	2932	3187	2872	2498	2870	2618	2347	3067	2537	2269	2868	2385	2865	2351	2657	2566	2367	3114	2709	2789	2785	3064	2716	3167	2658	2687	3177	3148	3261	3248	3005	3270	3304	3860	3594	3979	3851	3698	LOC18789161
18769639	2179	2341	2457	4227	4092	2009	3670	3423	3785	3139	2908	3383	2748	2740	2779	2506	2235	2875	3280	3366	3806	2903	3088	3176	2971	3036	2541	3147	2884	2889	2921	3153	2605	2675	2650	2798	2989	2866	3019	2820	3055	2727	2862	3532	2700	3480	3381	3584	LOC18769639
18776699	2986	2822	2784	2532	2559	2756	3172	2683	3461	3383	3057	3506	3323	2887	3328	2819	2915	3824	2472	2479	2714	2540	3229	2848	2687	3014	2716	3319	2740	3152	3044	3056	2753	3304	3219	2766	2797	3301	3423	3253	3315	3147	2850	3028	3022	3086	3299	3010	LOC18776699
18771242	2584	2596	2524	3407	3307	7631	3127	3004	3188	2991	2661	2908	2592	2285	2556	2681	2074	2770	2876	2857	3260	2944	2899	2812	2338	2504	2407	2607	2207	2460	2834	2740	2519	2565	2936	2453	2924	2717	2895	3419	3439	3240	3517	3900	3406	3834	3975	4005	LOC18771242
18766408	7682	8480	7875	3495	3582	3401	3298	2458	3333	3284	3138	3181	2919	2829	3482	2499	2408	2697	2558	2183	2928	2294	2539	3102	2619	2570	2760	3177	2945	2632	2230	2472	2277	2427	2783	2916	3499	3059	3348	2169	2092	2168	1560	2025	1604	1790	1845	1748	LOC18766408
18766119	1351	1274	1249	2506	2285	2091	3262	3018	3506	2766	2464	2606	2944	2674	2798	2768	2605	3081	2484	2354	2192	3157	3273	3252	2584	2950	2633	3351	2758	3079	2748	2873	2388	3500	3719	3900	2423	3946	4216	4978	4575	4242	3317	3776	3241	3526	3794	3802	LOC18766119
18774793	2643	3570	3092	3333	3735	3170	4103	2146	3707	4934	5795	4618	5144	5371	7253	4136	4315	3039	2757	2378	2576	2788	3000	3816	4622	3432	3914	3473	3105	2523	1819	1867	2449	2995	3147	2817	2870	2404	2794	1258	1171	1598	718	840	902	640	768	628	LOC18774793
18768241	3007	3017	3454	2419	3382	1109	2376	1503	2177	2902	3517	2915	2998	2511	3383	3019	2727	2968	4508	2479	3412	2802	2876	2648	2957	2586	2745	3753	3555	4308	2006	1839	1619	3488	3211	2786	2593	2693	3343	3591	3518	3756	5230	3573	3311	3287	3069	3173	LOC18768241
18772627	2646	2320	2866	2381	2382	1615	2749	2251	2750	2751	2605	3082	3048	2400	3046	2743	2622	3145	2434	2439	3175	2495	3069	2619	2485	2656	2511	3096	2730	2765	2905	3132	2854	3021	2763	2494	3778	3338	3462	3719	3766	3402	3391	4050	3574	4801	4610	5114	LOC18772627
18788729	3202	3183	2982	3246	3282	3107	2931	2939	3178	2927	2818	2904	2873	2359	2644	2525	2467	2810	2522	2372	2923	2152	2512	2279	2615	2709	2653	2977	2669	2747	2919	2822	2689	3023	2992	2546	3678	3748	3876	4179	3900	3688	3074	3784	3046	3431	3611	3417	LOC18788729
18780514	5016	5095	5196	2840	3025	2893	2957	2531	3040	3807	3556	3609	4052	3522	3940	3358	3184	3606	2650	2732	2879	2527	2770	2847	2980	2759	2518	3033	2704	2805	2639	2509	2571	2854	2535	2463	2645	2446	2958	2691	2751	2691	2066	2124	2196	2248	2596	2437	LOC18780514
18791534	3000	3027	3159	2977	3178	4168	3320	2564	3003	3094	3127	3323	3626	3168	3522	3038	2841	3308	2734	2632	3313	3113	3340	3286	3209	3227	3252	3787	3332	3117	2950	3179	2969	3411	2875	2942	3525	3062	3488	2627	2699	2767	1909	2368	1923	1784	1781	1680	LOC18791534
18789302	3107	3172	3272	2237	2542	2435	3190	2643	3134	3080	3044	3028	3686	3511	3863	3416	3061	3586	2803	2521	3136	3079	3270	3437	3275	3062	2978	3563	3222	3460	2969	3021	2932	3297	3151	2964	4188	2991	3349	2857	2962	2571	1946	2156	1998	2194	2274	2019	LOC18789302
18786902	2218	2072	2123	3688	3429	8007	3182	3153	3572	3394	2632	2957	2289	1793	2131	1922	1769	2377	3223	3272	3850	2881	2686	2223	2179	2089	2019	2061	1961	2169	2840	2910	2421	2366	2892	1957	2451	2693	2598	3828	3647	3461	3920	4041	3851	4640	4811	4574	LOC18786902
18767451	3601	3743	3804	4038	3711	4351	2909	3187	3482	3115	2445	2571	2220	1785	2211	2005	1856	2328	3100	3545	3808	2753	2988	2391	2349	2165	2236	2423	2033	2657	3112	2981	2505	2655	3129	2388	3432	2913	2902	3727	3601	3587	3256	3078	3208	3831	3583	3519	LOC18767451
18770497	3637	3499	3567	2649	2651	1446	3023	2506	3019	3364	2926	3277	3641	3319	3471	2947	2833	3326	2877	2812	3140	3161	3383	3004	3015	2884	3069	3556	3020	3366	3066	3124	2838	3242	3167	2877	2943	2949	3169	3095	2872	2913	2371	2476	2572	2345	2475	2325	LOC18770497
18778545	3625	4043	3902	2529	2756	2090	3236	2385	2935	3564	4162	4158	3784	3778	4262	3392	3010	3347	3278	2793	3205	3206	3137	3116	3804	3175	3251	3103	3214	3085	2876	2880	2944	3070	2782	2708	3382	2600	3012	2441	1924	2617	1579	1657	1976	1631	1926	1858	LOC18778545
18772184	3036	3512	3382	2135	2265	2348	3503	2378	3244	3689	3656	3490	4309	4080	4565	3759	3468	3667	2856	2635	2737	3449	3374	3654	3764	3640	3805	4072	3646	3677	2893	2883	2853	3998	2881	2723	2568	2543	3695	1982	1957	2180	1379	1377	1483	1257	1371	1194	LOC18772184
18772862	2801	2478	2588	4077	3766	5515	3104	3223	3631	2999	2548	2905	2362	1946	2310	2212	2105	2650	3021	3347	3513	2870	2981	2448	2298	2249	2235	2511	2283	2469	3084	2943	2453	2885	3017	2456	3254	3070	3001	3669	4027	3536	3526	3575	3407	3155	3220	3181	LOC18772862
18787236	3500	3511	3534	2532	2706	1666	2998	2592	3120	3298	2780	3091	3040	2559	2874	2848	2737	3463	2551	2596	2913	2609	2982	2820	2520	2672	2413	3015	2570	2966	2857	2843	2408	3069	3145	2764	3734	3218	3327	3250	3176	3174	3187	3326	3299	3496	3456	3625	LOC18787236
18784730	2806	2747	2700	2600	2711	2586	2853	2567	2945	3347	2714	3078	3050	2565	2853	2795	2981	3520	2782	2792	2819	2577	2735	2635	2339	2443	2442	2883	2293	2596	2570	2659	2239	2921	3241	2728	3062	3291	3463	3590	3416	3249	3265	3800	3746	4066	4173	4408	LOC18784730
18782775	3810	3799	3804	2724	2863	2017	3108	2801	3262	3146	2858	3016	3275	2858	3149	3231	3039	3661	2686	2681	2677	2807	3104	2945	2689	2713	2857	3312	2651	3158	3065	3057	2731	3143	3282	2723	2855	3101	3093	2843	2953	3046	2581	2609	2782	2650	2791	2509	LOC18782775
18776553	3286	3408	3427	2655	3020	2361	3030	2568	2987	3432	3469	3457	3875	3106	3713	3186	2899	3575	3177	2782	3454	3023	3192	3222	3191	2927	3055	3420	3101	3097	3151	2868	2784	3173	3009	2698	3317	2889	3240	2966	2661	2738	1849	2038	2107	1976	1985	1965	LOC18776553
18766582	3291	3499	3342	2617	2715	2510	3043	2683	3180	3204	3024	3081	3283	3082	3462	3246	3091	3445	2703	2611	3021	2901	3257	3072	2834	2766	2800	3365	2963	3174	2854	2903	2748	3339	3318	3016	3920	3028	3291	2930	2810	2881	2135	2359	2241	2530	2520	2408	LOC18766582
18774246	3088	2970	3073	2532	2433	1412	2581	2485	2632	2728	2582	2827	2738	2283	2648	2465	2380	2799	2960	2753	3009	2629	3141	2483	2414	2323	2269	2935	2502	2629	2585	2792	2371	2903	2997	2457	3212	3203	3286	3915	3713	2975	3102	4052	3647	5344	5665	5539	LOC18774246
18782859	3353	3345	3573	2920	3298	1145	3153	2377	2965	3326	3330	3272	4169	4132	4515	3539	3444	3434	3045	2697	2853	3249	3310	3570	3304	3042	3366	3748	3541	3557	2901	2905	2666	3349	3030	2820	2619	2924	3437	2295	2041	2125	1769	1739	1898	1801	1793	1773	LOC18782859
18792410	3443	3537	3521	3393	3160	2445	2848	2733	3140	2976	2320	2492	2358	2253	2253	2183	2098	2715	3088	3149	3707	2632	2702	2336	2022	2219	2016	2415	2105	2339	2624	2576	2192	2733	2950	2336	3862	3146	3132	4082	4161	3617	3814	4189	3776	4279	4147	4232	LOC18792410
18771876	3179	3147	3098	2606	2543	3725	3193	2734	3198	3377	2987	3303	3494	2730	3261	3130	3070	3572	2549	2545	2264	2873	3127	2957	2738	2813	2803	2934	2583	2967	3104	2976	2603	3002	3244	2628	2660	3079	3277	3250	3318	3134	2409	2447	2801	2849	3001	3107	LOC18771876
18774504	3841	3877	3801	3572	3359	1528	3132	3449	3728	3109	2085	2752	2311	1930	2030	2078	2124	3088	2885	3185	3260	3175	3756	2803	2058	2326	2076	2533	2019	2786	3305	3319	2517	2517	2863	2159	3203	3622	3360	3354	3582	3282	3680	3053	3418	3469	3289	3629	LOC18774504
18792164	3547	3492	3556	2832	3210	1918	2685	2426	2877	3183	2745	3220	2943	2385	2900	2689	2493	2850	2879	2865	3211	2740	3073	2707	2692	2704	2787	3010	2680	2830	2893	2853	2576	3104	3064	2789	3098	3313	3594	3323	3355	3390	2852	3039	2947	3184	3318	3369	LOC18792164
18787448	3263	2944	3025	3403	3298	4069	3040	3032	3445	3071	2507	3019	2430	1836	2218	2300	2020	2661	2855	3057	3373	2770	3052	2302	2274	2121	2159	2382	2092	2602	2836	2881	2430	2915	3072	2302	2521	2912	2949	3563	3740	3797	3640	3775	3723	3977	4351	4182	LOC18787448
18768970	331	226	233	3875	3610	1956	2484	2615	3117	2454	2070	2315	1286	1097	1478	1469	1281	1911	3896	3828	4395	2862	3210	2260	2063	2088	2026	2207	1820	2087	2654	2754	2108	3052	3559	2630	3494	3459	3362	5064	5205	4219	4708	5416	4704	6217	6470	6556	LOC18768970
18770397	3030	2888	2788	2723	3125	1866	2906	2867	3116	3140	2803	2784	3261	2537	2934	2929	2818	3093	2904	2758	3035	2675	2805	2656	2533	2506	2512	2714	2421	2797	3004	2963	2554	2908	3554	2778	3044	3229	3364	3577	3461	3285	2808	3435	3274	3539	3656	3823	LOC18770397
18779670	2984	3720	3136	1519	1421	1837	3103	1767	2640	2804	2851	2436	4798	5410	5980	4870	4539	4384	1912	1637	1600	2819	3165	4205	3831	3506	3948	4351	4182	3508	2424	2650	2556	3845	3011	2947	3037	2986	3994	2245	2123	2135	1465	1778	1619	1419	1605	1448	LOC18779670
18784799	4404	5480	5476	2164	2178	3355	2702	2052	2493	2358	2090	2262	2822	3078	3305	3199	2826	3168	2460	2317	2641	3122	3427	3418	2582	2964	2818	3718	3263	3545	3148	2735	2870	2640	2903	2771	3678	3009	3346	2745	2532	2360	2248	2954	2710	2477	2619	2500	LOC18784799
18768652	2791	2405	2773	2162	2137	1033	2430	1833	2035	2679	2703	3561	4173	3232	3522	3387	2994	4528	3033	2950	3510	3553	4189	3572	2799	3141	2688	3323	3010	3097	3832	3846	3499	2893	2956	2664	2841	2996	2902	2945	3815	3109	2652	2480	2794	2152	2252	2031	LOC18768652
18769042	3538	3609	3754	2880	2752	3742	3692	2989	3372	3497	3303	3279	3781	3435	3566	3468	3160	3577	2796	2640	2753	3064	3209	3456	3098	3090	2943	3311	3104	3165	2845	2867	2772	2936	3031	2973	2939	2633	2946	2609	2471	2378	1602	1710	1690	1820	1837	1751	LOC18769042
18787928	3539	3518	3617	3063	2952	2428	3021	3052	3329	3448	2723	3222	3170	2880	3139	2965	2936	3635	2643	2712	3147	2823	3104	2878	2637	2902	2650	3294	2673	3121	2940	2873	2569	3145	3094	2883	3526	3053	3450	2707	2634	2590	2300	2515	2488	2509	2522	2578	LOC18787928
18774786	3236	3303	3204	2952	3068	1885	3270	2897	3336	3388	3187	3282	3531	3287	3583	3091	3161	3480	3046	2612	3038	3075	3314	3087	3028	2970	3119	3296	2995	3268	3139	3113	2904	3016	3107	2865	3257	2752	3018	2775	2677	2676	1937	2189	2121	1989	2093	1978	LOC18774786
18777372	4856	4518	4732	2958	3097	4557	3179	3216	3531	3470	2894	2976	2944	2848	3038	2601	2464	2878	2667	2541	2732	3034	3252	3223	2778	2764	2599	3328	2913	3106	2887	2850	2756	2969	2980	2920	2418	2732	2874	2584	2488	2476	2070	2207	1988	2259	2259	2103	LOC18777372
18782167	3040	2711	3067	3159	3072	3328	2781	2960	3107	3048	2498	2691	2648	2327	2535	2715	2328	2983	3233	3142	3132	2885	3091	2651	2522	2472	2400	2902	2484	2864	3032	3127	2716	2988	2991	2311	2354	2998	3064	3673	3487	3340	3008	3318	3167	3703	3799	3592	LOC18782167
18784832	1633	1474	1455	2116	2319	798	2802	2159	2737	2244	2213	2369	2780	2384	2993	2557	2487	3009	2851	2847	2819	3348	3991	3514	2966	3469	3022	3629	3114	3461	3755	3965	3471	3188	3898	3617	3885	4387	4373	3937	3495	3606	2546	2844	2813	2582	2658	2698	LOC18784832
18769691	2309	2104	2078	2742	2744	4362	3421	3144	3590	3720	2862	3117	4065	3356	3195	3553	3544	4427	2229	2433	2710	2834	3011	2746	2474	2424	2564	2640	2372	2800	2899	2696	2533	2909	3410	2707	3383	2690	2893	3013	3289	2899	2323	2294	2673	3112	2970	3003	LOC18769691
18770941	4	4	5	1449	1863	591	3754	2066	3557	2990	3571	3009	4311	4607	5857	3765	3758	2781	2792	2240	2412	3679	4138	5498	4758	4956	5092	4607	4159	3362	2636	2458	3665	3353	3514	4216	4213	4213	4098	2430	2517	3295	946	1551	662	529	735	434	LOC18770941
18776629	3578	3544	3441	2590	2630	2372	3093	2721	2939	3244	2823	3307	3563	3084	3276	3411	3025	3697	2729	2551	2724	2670	2973	2965	2764	2717	2721	3262	2812	2983	2947	2875	2584	3053	3225	2852	2762	3029	3129	2945	2894	3085	2543	2414	2498	2428	2894	2604	LOC18776629
18766431	2851	3204	3107	3986	3757	6248	3062	3220	3447	3233	2493	2867	2089	1646	1921	1976	1691	2588	3535	3568	4009	2479	2723	2148	1867	1933	1809	2250	1991	2483	2679	2570	2172	2427	2873	2177	3226	2698	2849	3154	3435	3035	3780	4208	3721	3977	3962	3834	LOC18766431
18777104	4667	4965	5261	2930	3155	4027	3236	2912	3359	3198	2857	3002	3194	3162	3218	3075	2694	3202	3030	2828	3243	2822	2997	3274	2884	2862	2906	3254	2983	2786	2766	2566	2628	2970	3136	3004	3522	2752	2897	2275	2287	2109	1679	1658	1517	1796	1718	1599	LOC18777104
18772694	2357	2332	2284	2726	2960	2705	2996	2419	2859	3054	3050	3050	3074	2645	3183	2834	2668	3102	2955	3043	3435	2932	3176	3132	2678	2919	2952	3222	2683	2811	3067	2923	2826	3121	3252	2760	3656	3212	3441	3302	3328	3217	2664	2895	2589	2705	2859	2762	LOC18772694
18789023	3887	3717	3626	2735	2678	2571	3238	2426	2970	3016	2917	3242	3446	3037	3315	3010	3066	3408	2734	2797	2878	2934	3241	2917	2983	2924	2983	3338	2912	2991	2896	2926	2646	3319	3055	2718	2940	2800	3284	2775	2838	2717	2352	2520	2249	2192	2271	2168	LOC18789023
18769714	3570	3294	3563	2781	2800	2951	2897	2619	3109	3451	3296	3457	3190	2639	2989	2708	2639	3242	2457	2429	2567	2615	2923	2627	2793	2484	2724	3023	2726	2751	3234	3206	2806	3075	2715	2500	2607	3029	3307	3533	3279	3294	2729	2898	2903	2497	2803	2834	LOC18769714
18777157	2249	2419	2580	3296	3465	4619	3347	2558	3197	4179	4450	4537	3458	2944	3324	2583	2298	2855	3530	3200	3833	3119	3138	3098	3680	3222	3347	3142	2822	2631	2888	2901	2746	2964	2556	2313	2429	2394	3142	2619	2441	2826	1686	1954	2057	1892	1815	1788	LOC18777157
18789530	2381	2276	2239	2615	2543	1312	3107	2936	3254	2933	2497	3112	3085	2373	2854	2624	2490	3100	2833	3086	3079	2878	3323	2830	2678	2632	2650	3234	2588	3132	3187	3101	2748	2992	3508	2701	3366	3182	3195	3475	3402	3124	2836	3238	2978	3614	3666	3542	LOC18789530
18791916	2646	2909	3088	2813	3004	1688	3498	2797	3326	3599	4056	4373	4192	3947	3914	3221	2635	3346	3197	2938	3304	3198	3311	3695	4201	3573	3336	3400	3239	3006	2802	2858	2713	3329	2587	3084	2589	2466	2978	2478	2189	2592	1390	1333	1406	1322	1359	1549	LOC18791916
18770673	5214	4647	5304	2366	3114	2487	2693	1922	2237	2735	3560	3769	3661	3309	3756	3005	2710	3422	5421	4291	6590	2853	2899	3363	3084	3160	4217	3749	3567	3224	2663	2606	2505	3241	2279	2241	2599	2437	2886	1748	1772	1801	1006	1011	804	720	890	793	LOC18770673
18766581	759	719	667	4950	4194	2513	1910	2528	2797	2274	1948	2261	1279	1024	1365	1205	1233	1460	3053	3144	3271	2348	2626	2171	1632	1552	1610	1676	1293	1634	1781	1792	1500	2438	2479	2103	3286	3249	3472	4904	5453	4217	5738	7267	5305	8155	8053	8002	LOC18766581
18789024	3391	3323	3249	2818	2896	3736	2873	2436	2957	3240	3309	3274	3327	2825	3526	2842	2730	3034	3022	2766	3025	2928	3087	2877	3219	2872	2976	3241	2937	2997	3031	3143	2737	3146	2909	2515	2711	2674	3198	2964	2905	2989	2293	2359	2427	2180	2243	2109	LOC18789024
18792109	4151	3774	3631	2870	2810	2588	2910	2742	3174	3263	2825	3141	3067	2439	2726	2847	2582	3319	2686	2760	2966	2604	2921	2733	2471	2594	2525	2911	2478	2861	3045	3041	2594	2869	2949	2564	2637	3249	3236	3041	3324	3035	2885	2900	3245	2711	2782	2763	LOC18792109
18774672	2497	2652	2808	2628	2743	3507	3087	2307	2823	3819	4199	4077	4266	3701	4360	3294	2756	3218	2902	2616	2686	3032	2870	3204	3611	3124	3670	3430	3184	3071	2832	2764	2691	3024	2540	2755	2388	2590	3210	2719	2238	2743	1736	2009	1819	1949	2084	1971	LOC18774672
18791309	3787	3647	3446	2536	2661	1349	2694	2404	3173	2632	2658	2967	3130	2638	3265	2918	2584	2971	3028	2781	3120	3019	3411	2968	2825	2922	2808	3169	2714	3011	3176	3086	2680	3245	3316	2787	3220	3274	3486	3182	3100	3001	2381	2632	2329	2565	2800	2637	LOC18791309
18772284	2134	2434	2634	5255	4673	1946	2213	2898	3464	2736	2092	2640	1603	1219	1728	1203	1148	1613	4568	4992	5621	2752	2679	2399	1517	1478	1523	1443	1292	1566	2144	2231	1690	1827	2396	1737	2844	2724	2637	3482	3779	3513	4921	4507	4629	6290	6721	6390	LOC18772284
18790441	3720	4244	4491	2883	3005	2819	3076	2457	2813	3564	3662	3779	3690	3314	3512	2971	2468	2984	4037	3081	3878	2871	3066	3001	2993	2804	2775	3105	2731	2777	2468	2485	2366	2831	2665	2704	3389	2905	2775	2723	2461	2466	1809	2094	1853	1746	1796	1792	LOC18790441
18774739	2057	2177	2384	3047	3193	4575	3780	3050	3387	3959	4318	4528	3789	3447	3638	2920	2481	3111	3206	3053	2873	3250	3164	3246	3539	3184	3356	3293	2925	2926	2839	2762	2615	2905	2495	2767	1651	2410	3173	2683	2342	2835	1661	1653	1787	1604	1904	1757	LOC18774739
18772574	15286	20092	19613	5840	4673	5039	3157	3540	3579	5336	4182	5454	2361	1288	1040	1084	1081	2361	2637	2448	2294	1541	1686	1184	965	652	718	807	752	1412	1742	1434	1120	1721	1470	752	564	910	570	1322	700	1112	965	412	697	645	811	638	LOC18772574
18788907	3402	3416	3382	2546	2645	1678	2679	2445	2904	2906	2699	3089	3153	2776	3017	2961	2862	3355	2798	2805	2877	2582	2971	2710	2576	2692	2514	2939	2704	2908	2802	2803	2386	2925	2995	2556	3254	3052	3091	3032	3044	3060	3132	3265	3368	3224	3428	3260	LOC18788907
18780630	4477	3665	4226	7624	6639	6907	2583	2760	2850	2183	1777	2085	1432	1015	1087	1432	1217	2234	5211	6973	7683	2184	2492	1766	1222	1248	1087	1062	1013	1178	2861	2961	1927	1958	2529	1663	2522	2646	2015	2743	3331	2915	3481	2359	2687	3952	3851	3948	LOC18780630
18767717	4536	4902	4658	4160	4197	3182	3154	3169	3355	4141	3209	3697	2712	2174	2495	2157	1943	2412	2324	2350	3261	2334	2528	2150	2271	2157	2148	2545	2180	2300	2716	2668	2437	2673	2334	2130	2957	2645	2659	2992	2763	2910	2799	3024	2833	3391	3472	3394	LOC18767717
18768234	3525	3592	3667	3438	3451	5202	2972	3054	3305	3654	2418	2780	2664	2112	2089	2729	2445	3164	3387	3039	3165	2695	3011	2373	2105	2147	1976	2922	2539	2868	2598	2345	2168	3194	3257	2364	3569	2900	3141	2763	2894	2436	2672	2892	3192	2867	2906	2948	LOC18768234
18784134	3088	3113	3377	2164	2404	1820	3173	2472	3120	3237	2710	2981	3698	3646	3809	3330	3079	3596	2761	2517	2819	3062	3271	3387	3125	3258	3060	3413	3190	3212	2911	2781	2682	3412	3016	3025	3135	2840	3239	3055	2659	2772	2044	2037	1916	2040	2012	1890	LOC18784134
18791121	3960	4303	3939	5071	4804	6025	3233	3557	3808	3585	2732	3046	1972	1825	2075	1980	1723	2225	3403	4183	4788	2786	2912	2364	2035	2001	1990	2261	1846	2379	2748	2534	2139	2392	2583	1915	3005	2496	2446	2679	2952	2869	2589	2566	2245	2779	2832	2775	LOC18791121
18775261	3123	2670	2937	3153	3266	2531	2919	2431	2690	2967	3091	3408	3113	2748	2990	2762	2499	3191	3904	3617	3976	2918	3000	3258	2711	2901	2638	2939	2633	2806	2611	2581	2636	2733	3034	3062	2741	3274	3142	3358	3177	3114	2301	2433	2240	2367	2462	2288	LOC18775261
18774312	1680	1519	1712	3087	2953	3772	3269	3331	3512	3068	2116	2761	2536	2222	2140	2809	2351	3530	2788	2725	3105	2820	3174	2539	2191	2653	2209	2921	2615	2824	3083	3283	2750	2658	2716	2466	2431	3195	3131	3716	3901	3419	3593	3901	3150	3767	3636	3559	LOC18774312
18781224	2324	2355	2224	2641	2710	4475	3118	3192	3250	3392	2681	2905	3208	2820	2819	3023	2901	3480	2789	2540	2779	3019	3176	2963	2660	2996	2739	3258	2772	3012	3181	2785	2940	2650	3170	2833	3064	3570	3495	3119	3056	3020	2230	2638	2196	2398	2329	2310	LOC18781224
18793306	1401	3937	2243	1076	1063	680	4335	3311	2901	1901	1380	1691	6546	8367	6225	3938	3621	3875	1180	997	1408	4243	3160	5829	2512	2650	3547	7632	7233	6415	2553	3779	3709	1908	1245	2094	4104	4666	6359	708	786	691	212	848	31	57	51	22	LOC18793306
18782485	3154	3379	3269	2412	2374	2488	2492	2364	2710	2418	2468	2721	3034	2743	3045	2827	2264	2893	3196	2863	3389	3105	3258	3105	2542	2648	2632	3179	2942	3287	2772	2852	2649	3326	3414	3034	2766	2690	2862	3321	3108	3226	2873	3112	2235	3100	3351	3223	LOC18782485
18788591	5905	6923	6756	2283	2413	1157	2404	1882	2374	2348	2228	2338	3134	3308	3418	3021	2703	2930	2513	2222	2576	2349	2803	2746	2273	2339	2554	3343	3238	3246	2449	2552	2301	2548	2445	2126	3066	3171	3642	2642	2539	2513	3093	3101	2871	2681	3034	2605	LOC18788591
18788516	1767	1545	1460	4086	3642	2370	3131	3169	3631	1961	1501	1685	987	723	850	1028	854	1294	2561	3042	2984	2589	2311	1960	1376	1477	1253	1087	884	1272	1759	1666	1410	2378	3242	2782	2593	3516	3038	5196	4787	5539	5418	7235	5392	7173	8542	8917	LOC18788516
18778928	2491	2359	2301	3794	3622	5704	3516	3575	4076	3322	2521	2716	2361	1907	2014	2414	2160	2923	2954	2957	3670	3351	3499	2737	2238	2377	2054	2454	2264	2692	3233	2828	2726	2894	3284	2443	3786	2707	2581	3261	3212	2998	2678	2430	2375	2753	2942	2885	LOC18778928
18782305	5048	4266	4473	2628	2685	3846	2770	2240	2679	3904	3572	4426	2968	2168	2843	2031	2337	3013	2337	2378	3319	2339	2888	2385	2588	2832	2592	2944	2518	2617	2782	2922	2541	3100	2498	2544	3595	3057	3190	3031	2904	3221	2742	2637	3283	1679	1854	1818	LOC18782305
18771215	1713	1615	1762	1818	2091	851	2156	1651	2047	2629	2979	3101	2665	2182	2740	2581	2111	2607	3499	2554	3339	2806	2907	2950	2658	2641	2747	2487	2341	2462	2348	2573	2411	2341	2661	2421	3558	3338	3447	4709	4498	3916	3995	5846	4039	4369	5082	4781	LOC18771215
18776120	1303	1049	1154	5260	5090	3258	2501	2530	3190	2924	2462	2643	2334	2036	2459	1937	2040	2267	3803	3808	4733	3079	3203	2958	2328	2583	2498	2645	2180	2630	2579	2473	2536	3695	3402	3010	3975	3278	3851	3373	3730	3439	2465	2706	2514	3109	3046	2914	LOC18776120
18783773	3929	3777	3839	2307	2530	1492	2876	2294	2872	3271	3136	3384	3696	3028	3740	3157	3240	3489	2572	2423	2692	2808	3141	3107	2948	2955	3074	3481	2985	2977	2906	2938	2630	3242	2925	2803	3017	2905	3084	2647	2453	2689	2025	2149	2378	2299	2409	2241	LOC18783773
18769641	4243	4871	3649	5049	4512	6317	3180	4030	4426	3650	2463	2524	1821	1916	2005	2150	2312	2256	2767	3027	3142	2339	2370	2193	1615	1566	1707	2284	1798	2376	2336	2229	1821	2544	3280	2564	2995	2682	2895	3027	2810	2727	3018	2805	2404	3306	3659	3283	LOC18769641
18777560	3672	3226	3044	4104	3886	5329	3169	3281	3848	3339	2824	3328	2684	2139	2321	2218	1984	2641	3459	3628	2996	2917	2928	2490	2152	2284	2402	2238	2228	2312	2921	2665	2395	2668	2801	2531	1407	2648	2533	2961	3280	3204	3040	2751	3118	2775	3120	3000	LOC18777560
18786216	3283	3220	3272	3726	3811	4695	3761	3463	3759	3959	3169	3603	3292	2965	3431	2663	3013	3280	3109	3258	4008	2619	3018	2934	2369	2767	2645	2960	2288	2550	2627	2374	2448	2215	2618	2457	3388	3202	3388	2506	2335	2517	1800	1831	1739	1503	1507	1523	LOC18786216
18775788	2758	3292	3241	2089	2078	2181	3552	2847	3297	3340	2717	3072	3584	3752	3668	3522	3310	3635	2445	2210	2210	3228	3336	3649	3189	3412	3351	3963	3479	3483	2808	2766	2745	3051	3393	3256	2431	2722	2929	2513	2355	2271	1907	2037	1878	2016	2030	1865	LOC18775788
18792672	3641	3877	3623	3643	3388	8503	3207	3366	3639	2903	2354	2544	2369	1911	2314	2198	1970	2528	3050	3126	3578	2564	2627	2315	2069	2200	1988	2268	2007	2250	2638	2663	2287	2587	2743	2300	3590	2855	2815	2892	3070	2805	2435	2862	2694	3273	3100	3232	LOC18792672
18769285	4300	4302	4271	2703	2803	1381	2733	2432	3066	3066	2877	3022	3143	2757	3299	3016	2776	3435	2844	2890	3266	2656	3083	2856	2686	2731	2544	2944	2547	2653	2699	2548	2408	2926	2765	2504	3317	2831	3002	2826	2726	2763	2541	2625	2586	2728	2922	3034	LOC18769285
18786335	2841	2551	2616	2732	2637	2403	2986	2794	3081	2929	2448	2771	3190	2681	3086	2983	2836	3244	2852	2608	2875	2746	3041	2843	2623	2684	2707	3448	2862	3118	2771	2824	2661	3098	3362	2931	3209	3367	3707	3291	3295	3026	2452	3058	2615	2614	2810	2442	LOC18786335
18778104	3486	4099	3949	2297	2448	2592	3107	2317	2815	3839	4088	3823	3712	3292	3534	2809	2739	3039	2429	2248	2505	2932	3110	3286	3404	3311	3387	3648	3320	3228	2984	3009	2882	3270	2490	2738	3084	2586	3179	2621	2453	2961	1611	1641	1891	1380	1574	1449	LOC18778104
18789918	1825	2054	1996	3236	3072	5032	3277	3305	3565	3813	3323	3484	3235	2512	2873	2489	2095	2643	2849	2843	3324	2924	3139	2942	2797	2536	2664	2804	2555	2766	2944	2999	2611	2737	3092	2491	3612	2709	2709	3249	3348	3197	2533	2452	2654	2296	2422	2457	LOC18789918
18776117	2564	2454	2456	3076	2871	1979	2800	2618	2907	2983	2494	2902	2695	2188	2604	2373	2331	2866	2610	2603	3074	2518	2737	2631	2479	2609	2313	3024	2589	2847	3060	3218	2755	2917	3186	2678	3682	3400	3452	3742	3493	3462	3333	3594	3188	3258	3405	3464	LOC18776117
18782352	1264	1090	1039	1903	2213	1692	2455	1665	2247	2129	2473	2503	3208	2966	3731	3420	3131	3351	3023	2609	3764	2595	3001	3244	2758	3058	2984	3554	3195	2770	3043	3063	3006	2959	3032	2921	4212	3794	4505	4078	4144	3685	2677	4000	2267	2709	2811	2353	LOC18782352
18789843	2941	2765	2741	2889	2894	3908	2824	2695	2987	3024	2718	2913	2611	2360	2591	2606	2481	2809	2966	2923	3002	3268	3207	3038	2581	2619	2603	3013	2610	2920	2837	2921	2641	3087	3358	2771	3018	3120	3168	3571	3403	3272	2464	2510	2345	2694	2817	2726	LOC18789843
18771294	3092	3288	3397	2575	2781	741	3316	2305	3101	3550	4092	3976	3858	3755	4016	3145	2557	3130	3034	2747	3274	3063	3310	3717	3838	3352	3533	3653	3404	3022	2753	2865	2862	3395	2521	2787	3119	2571	3187	2287	2045	2640	1366	1410	1510	1439	1442	1374	LOC18771294
18779444	2683	2721	2664	2780	2901	6665	3127	2759	3083	3333	2665	3028	2917	2506	2782	2565	2337	2773	3021	2731	3201	2874	3017	2926	2908	2754	2611	2960	2628	2716	2834	2699	2451	2820	2864	2683	3126	2681	2948	2908	2877	2898	2311	2668	2237	2809	2877	2774	LOC18779444
18793798	109	83	107	2196	2445	432	3157	3293	4130	1638	1628	1471	1757	1975	1901	2270	2047	2027	2737	2631	2709	3592	3633	3493	3912	3715	3643	3647	3077	3622	3580	3965	3085	4711	5177	5278	4332	4194	3952	4279	3723	4304	2069	2498	2293	2321	2707	2522	LOC18793798
18778871	2594	2706	2829	3384	3216	1969	3267	2944	3282	3585	2926	3270	3192	2819	2953	2812	2599	3339	3251	3388	3869	2805	2853	2876	2416	2566	2499	2670	2559	2794	2915	2812	2484	2762	3091	2617	3121	2766	2874	3104	2950	2747	2253	2635	2322	2626	2809	2917	LOC18778871
18780290	3463	2812	2933	2067	1944	2752	2809	2460	2476	3281	3177	3701	4154	3154	2974	4488	3637	5519	2242	2489	2288	3184	3651	3058	2554	2838	2457	3085	2765	3158	3605	3520	3053	3261	2952	2242	2736	2821	2959	2957	3025	2727	1818	1915	2254	1510	1571	1512	LOC18780290
18789477	2967	3071	3046	2947	2999	4893	3131	2842	3249	3583	3066	3383	3191	3085	3371	3143	2873	3169	2966	2756	3139	3032	3322	3084	2894	2875	2693	3284	2916	3127	2799	2856	2636	2954	2862	2644	3118	2775	2876	2587	2548	2517	1585	1900	1816	1777	1850	1776	LOC18789477
18769768	151	144	168	2046	2657	1002	2009	1753	1716	3063	3713	4530	3070	2302	2451	2959	2462	2945	6340	5293	6856	3066	2906	2764	4002	3235	3388	3097	2935	3405	2538	2694	2580	4986	4744	3797	3376	3261	3258	2784	2195	2762	1796	1750	2706	2074	2107	2027	LOC18769768
18777731	433	267	416	2466	2896	1475	3073	2502	3309	4093	3810	5014	2433	1905	1670	2365	2800	5301	3082	2924	3849	3683	6043	3536	2513	2818	2011	2694	2515	3008	4862	5052	3509	3875	4024	2431	2617	2761	2449	3068	4668	4502	2750	1318	1502	1188	1190	1097	LOC18777731
18784804	6760	8230	7594	2128	1997	2410	2411	2554	2792	3403	2090	2415	2032	1528	1621	2014	2010	2767	2553	2280	2211	3052	3630	3258	2292	2168	1988	2255	1932	2684	2845	2749	2125	2318	2849	1832	1999	2622	2553	2934	2687	2456	3212	3224	4109	3206	3419	3462	LOC18784804
18780441	1560	1604	1493	1484	1640	1196	2883	1865	2402	2856	2973	3347	4490	3936	4449	4284	4121	4716	2461	2224	2601	3166	3527	3655	3368	3690	3600	4262	3448	3329	3312	3276	3331	3671	3031	3094	3596	3326	3737	2597	2593	2398	1474	1958	1608	1312	1348	1353	LOC18780441
18778931	3994	4886	4382	1700	1560	1919	3250	2087	2699	1997	1439	1383	2887	2290	2337	5448	4773	5735	4375	5244	3253	3337	3748	3053	2615	2918	2787	3125	2887	3349	3623	3560	2609	2721	3214	2321	2156	2197	2104	2402	1893	1966	2000	1785	1939	1871	1952	1806	LOC18778931
18782127	5168	5202	5173	2049	2126	2742	2700	2101	2467	2514	2576	2510	3228	2743	3367	2319	2291	2592	2792	2552	2901	2866	2803	3256	2719	2943	2985	3688	3284	3398	3279	3342	3338	2376	2506	2214	3378	3105	3491	2440	2596	2211	2376	2554	2189	1877	2242	1996	LOC18782127
18769681	2811	2969	2880	3158	3041	3382	3456	3059	3447	3432	2989	3239	3087	2629	2661	2473	2323	2858	3045	3120	3330	3176	3268	3206	2866	2769	2753	2935	2587	2817	3024	3042	2640	2933	3240	2885	2515	2713	2677	2844	3049	2718	2159	1993	2110	2436	2339	2302	LOC18769681
18778989	1646	1458	1486	3253	2904	4913	2884	3090	3302	2961	2458	2521	2389	1972	1938	2580	2324	2918	2305	2301	2858	2382	2442	2078	1959	2169	1960	2568	2037	2495	3038	2890	2568	2334	2806	2214	3377	2984	3040	4262	4140	3783	3905	4845	3926	4080	4420	4180	LOC18778989
18788330	3899	3808	4096	1743	1784	1477	3089	2369	2784	2556	2458	2494	4300	3994	3686	3733	3855	4875	2118	1754	1887	3272	3321	3642	2872	3067	2610	3206	2992	3020	2919	2762	2629	2895	3162	3390	3312	2737	3150	2826	2515	2768	1676	1581	1578	2121	2274	2184	LOC18788330
18791429	456	485	354	3255	3165	3532	2459	2899	3326	2979	2158	2478	1526	1152	1596	1641	1382	1866	2589	2765	3185	2511	2735	2141	1909	1889	1950	1844	1520	2018	1990	2145	1630	2769	3324	2289	3931	2881	3107	4235	4385	4172	5322	5341	4485	7136	6958	7222	LOC18791429
18768027	1518	1345	1362	3492	3230	3699	2530	2682	3050	2881	2237	2833	1994	1585	1925	1919	1863	2241	3345	3573	3242	2734	2947	2382	2224	2117	2202	2628	2238	2723	2937	3020	2569	2696	2661	2163	1565	2996	3188	4100	4429	3708	4364	4676	4477	4263	4264	4198	LOC18768027
18793137	2755	2549	3072	2377	2779	911	3666	1657	2982	3121	3720	3541	3535	2938	4422	2942	2782	2566	3535	3149	3488	3050	3393	4215	4210	3811	4118	3077	2986	2426	2679	2973	3100	1987	2073	1866	2562	2572	3283	1868	1794	1928	2178	3084	2288	2148	2734	2088	LOC18793137
18776429	3498	2931	3291	4126	3590	5466	3104	3397	3956	2783	2035	2426	2148	1793	2058	2018	1739	2425	3167	3494	3820	2836	2914	2250	1987	1949	1849	2068	1792	2272	2688	2480	2244	2551	2877	2262	2504	2417	2427	3164	3331	3224	3061	3113	3001	4001	4109	4144	LOC18776429
18773199	2685	2574	2376	2878	2923	3398	3139	2668	3227	3373	3095	3276	3156	2452	3039	2760	2648	3045	2653	2645	3080	2742	2960	2537	2569	2747	2485	2880	2576	2565	2931	2863	2648	3011	2922	2492	3289	3057	3413	3252	3316	3364	2496	2877	2508	2356	2472	2257	LOC18773199
18787091	2630	2660	2506	2355	2539	3094	2852	2314	2764	3328	3476	3384	3711	3520	4102	3283	2764	3117	2521	2488	2588	3324	3439	3820	3325	3579	3695	3617	3205	3180	2748	3090	2932	3387	3272	3243	2286	2723	3200	2439	2409	2197	1712	1588	1544	1428	1685	1525	LOC18787091
18769137	3374	3223	3259	2554	2572	2630	3233	3051	3474	3473	2856	2973	3232	2857	2907	3032	2867	3485	2851	2655	2637	2899	3236	3067	2750	2739	2679	3078	2700	3102	3085	2767	2449	3089	3138	2907	2715	2859	2789	2723	2504	2467	2010	2081	2274	2547	2345	2297	LOC18769137
18769698	2959	2546	2672	2904	2837	4007	2553	2732	3003	2757	2311	2468	2552	2074	2441	2195	2073	2609	2550	2544	2699	2650	2654	2262	2195	2163	2165	2515	2302	2733	3152	2958	2574	2500	2802	2355	2474	3019	2902	3581	3659	3198	3520	3915	3703	4350	4430	4232	LOC18769698
18792841	100	71	88	1543	1897	309	3475	2336	2671	1741	2092	2235	5119	6248	5928	5562	4746	5090	2583	2256	2842	4063	4031	5806	2659	3572	3329	4590	4054	3659	3081	2943	3721	2614	2747	4535	3580	3951	3691	1882	1819	1460	1006	1550	743	875	868	647	LOC18792841
18776219	1235	1093	1134	3280	3445	3946	2202	2330	2475	3203	2786	2885	1977	1741	2278	1935	1917	1960	3049	2904	3476	2211	2766	2358	2371	2237	2246	2842	2165	2548	2534	2856	2297	2886	2888	2244	3400	3674	3670	3980	4365	3912	3945	4480	3819	4226	4143	4054	LOC18776219
18782579	4619	4548	4708	2023	2414	1843	2846	1970	2727	3065	3142	3055	3736	3520	3867	3315	3307	3709	2664	2027	2471	2679	2798	2961	3030	2988	2906	3617	3251	3016	2505	2595	2543	3567	2869	2845	2891	2737	3126	2060	2059	2293	1719	1537	2207	2051	1923	1956	LOC18782579
18773227	2856	2786	2856	2735	2652	3104	2597	2505	2844	2880	2658	2592	3109	2580	3106	2913	2819	3180	2885	2603	3078	2752	2888	2651	2567	2620	2619	2928	2615	2675	2844	2554	2465	2984	3102	2704	3279	3096	3056	2881	2737	2667	2485	2776	2465	3586	3583	3369	LOC18773227
18781346	386	1308	711	2630	3499	1123	2978	931	2880	2095	2099	1103	3127	3036	5954	4103	3403	2101	1592	922	1049	1338	1571	2524	4723	3447	4214	4649	3941	3883	1137	1356	1556	5344	1784	2260	2357	3047	6845	2278	2842	1887	8557	3019	2829	4064	4307	3472	LOC18781346
18778531	3290	3143	3271	3465	3355	2625	3376	3351	3486	3873	3077	3515	3089	2381	2946	2899	2261	2806	2605	2746	2885	2840	2975	2562	2452	2343	2293	2273	1918	2193	2701	2663	2481	2350	2394	1946	2326	2690	2733	3443	3236	3403	3019	3263	2745	2884	2968	2695	LOC18778531
18772076	5071	5514	4390	2829	2678	2703	3677	3025	3599	2574	2125	2180	2627	3388	3090	2463	1999	1973	2607	3118	3542	3216	3267	4077	2795	3158	3068	3583	3591	3162	2328	2432	2596	2315	2683	3332	3987	3256	3473	1936	1896	1814	1531	1926	1218	1332	1474	1435	LOC18772076
18777327	5333	4868	4814	2804	2671	2041	2652	2355	2717	2407	2177	2525	3015	2687	2951	2361	2182	2637	2357	2251	2320	3149	3315	3036	2234	2362	2221	2727	2327	2965	2943	2909	2795	2194	2638	2115	2349	2879	2806	3700	3074	3310	3319	3662	3236	2300	2772	2551	LOC18777327
18771758	3043	2869	3274	3487	3440	2529	3444	3055	3218	3816	3673	3556	3325	2700	3043	2641	2340	3289	2936	3074	2978	3224	3121	3082	2506	2625	2642	3003	2483	2983	3164	2945	2847	2470	2560	2126	2262	2560	2392	3144	2826	2815	2387	2044	2303	1995	1816	1823	LOC18771758
18784945	3102	2851	2840	3059	2943	1406	2577	2513	3011	2987	2688	2728	2742	2320	2651	2417	2299	2684	2457	2375	2985	2386	2587	2393	2345	2247	2123	2884	2436	2626	2804	2758	2532	2739	2676	2461	3353	3123	3199	3328	3226	3419	3404	3880	3470	3913	4123	3797	LOC18784945
18788409	2888	2724	2814	2605	2595	1576	2190	2086	2292	2313	2339	2438	2472	2071	2685	2910	2484	2680	2936	2627	3323	2414	2673	2302	2343	2172	2193	2893	2630	2889	3081	3307	2772	2629	2954	2661	3436	3244	3069	3804	3347	3449	3119	3936	3547	4086	4083	3729	LOC18788409
18769600	3565	3627	3458	2297	2563	1866	2838	2297	2778	2971	2539	2873	3138	2711	3199	2941	2862	3309	2648	2509	2921	2824	3187	2772	2801	2603	2747	3317	2899	2846	3011	2816	2463	3105	3289	2512	3443	2813	3106	2798	2661	2509	2444	2604	2471	2739	2603	2477	LOC18769600
18766597	3312	3331	3399	2461	2447	1224	2749	2285	2706	2920	2673	3067	3303	2745	2920	2879	2878	3379	2572	2423	2937	2647	2845	2752	2486	2396	2535	2948	2598	3049	2837	2880	2277	3025	3074	2652	3336	2822	3093	3027	2997	3098	2708	2760	2852	3047	3176	3224	LOC18766597
18789002	4452	4546	4493	2989	3047	4459	2810	2665	3003	3541	3270	3490	3518	2924	3342	3037	2699	3178	2572	2540	2778	2618	2645	2772	2661	2480	2648	2958	2561	2615	2820	2710	2568	2759	2650	2323	2582	2363	2720	2338	2341	2337	1884	1859	2212	1865	2034	1987	LOC18789002
18780233	3294	3321	3221	2591	2744	3868	3288	2760	3103	3295	3121	3113	3527	3322	3517	2980	2873	3261	2722	2589	2642	3072	3196	3389	3095	3046	3187	3228	3036	3170	2921	2935	2681	2945	3164	3061	2573	2778	2833	2472	2238	2275	1482	1504	1754	1519	1449	1481	LOC18780233
18791592	3515	3478	3661	2591	2624	3458	3218	2782	3132	3359	3124	2926	3493	3306	3417	3000	2696	3233	2920	2526	3053	2904	3161	3228	3169	2988	2943	3384	3163	3190	2835	2722	2606	2929	2964	2958	3072	2625	2913	2287	2296	2337	1492	1712	1644	1532	1551	1461	LOC18791592
18784508	3437	3325	3018	2841	2860	922	2997	2531	3125	3122	2542	3050	2969	2617	3014	2799	2593	3215	2764	2459	3200	2632	3008	2576	2424	2742	2479	3061	2515	2832	2686	2941	2495	3119	3051	2668	3377	3190	3354	2886	2834	2945	2593	2706	2635	2897	2806	2717	LOC18784508
18793848	6077	4462	5342	4531	4556	3527	2958	2984	2907	3939	3971	4744	3242	2440	3298	2614	2265	3128	4809	4484	4683	2741	2740	2846	2005	2102	2209	2496	2212	2298	3016	2762	2682	2068	2012	2058	1593	2716	2451	2091	1666	1913	1034	1285	896	895	912	872	LOC18793848
18785181	2288	2244	2406	2300	2324	1990	2220	2111	2337	3560	3295	3678	3346	2892	3292	3077	2640	3310	2686	2694	2855	2769	2625	2492	2746	2214	2407	2715	2672	2827	2301	2723	2394	2484	2565	2244	2612	2855	2810	3485	3155	3142	3366	3584	3541	3821	3703	3731	LOC18785181
18782442	3176	3271	3216	3066	3093	2472	2816	2652	2850	2762	2706	2982	2839	2573	2855	2853	2469	2933	3120	3101	3141	2788	2993	2909	2590	2688	2558	2755	2675	2726	2865	2814	2439	2891	2822	2601	2522	2861	2972	3121	2957	2940	2567	2654	2463	2606	2816	2810	LOC18782442
18771708	5163	5228	5201	3059	3058	3269	2536	2659	3137	2990	2484	2615	2456	1986	2329	2617	2292	2988	2751	2594	2696	2482	2611	2308	2103	2278	2145	2575	2163	2491	2686	2507	2127	2612	2979	2295	2773	2930	2996	3032	2881	2767	3071	2804	2767	2972	2996	2825	LOC18771708
18766445	2209	1909	2186	2191	2206	661	2313	1865	2523	2160	2280	2498	2340	2232	2660	2317	2042	2401	2530	2638	2934	2464	3003	2386	2601	2357	2346	2793	2529	2524	2776	2791	2564	2621	2679	2457	3814	2908	3249	3496	3403	2979	3143	4544	3664	5929	5902	6172	LOC18766445
18779956	1935	1808	1802	2739	2687	3135	3321	2888	3389	3111	2794	3272	3354	2874	3124	3142	2955	3795	2840	2852	3283	2858	2991	2766	2420	2685	2428	2855	2541	2827	3033	2831	2614	2808	2819	2518	3021	2941	3069	2967	2966	2775	2365	2358	2233	2709	2748	2769	LOC18779956
18777493	2410	2107	2008	4525	4277	5304	3705	3620	4606	3518	2644	3032	2772	1960	2020	2796	2368	3232	3247	3302	3273	2452	2684	1942	1898	1743	1765	2149	1650	2040	2501	2198	2159	2943	2629	2198	2556	2870	2839	2986	2472	2715	3073	3445	3201	2706	3393	2932	LOC18777493
18783861	3817	4021	4105	2758	2792	2623	2563	2266	2707	3161	2367	2681	2727	2147	2622	2538	2499	2716	3332	2786	2782	2337	2898	2506	2309	2434	2289	3315	2856	3073	2547	2616	2463	3035	3150	2392	2638	3176	3336	2675	2569	2606	3342	3158	3477	2486	2631	2496	LOC18783861
18793008	1814	1757	1649	3460	3263	2358	2669	2975	3072	3091	2846	2927	2714	2357	2733	2760	2537	3039	2873	2923	3284	2532	2630	2281	2213	2039	1987	2528	2155	2508	2723	2956	2407	2360	2584	1989	2902	3055	2982	3768	3832	3632	3667	3487	3136	3550	3949	3836	LOC18793008
18782611	1228	1194	1102	2940	2714	4824	1792	1868	2229	1806	1702	1747	1114	828	1079	1276	1138	1420	2458	2542	2748	2129	2152	1636	1550	1551	1703	1709	1528	1792	2267	2604	1752	2609	3212	2288	3330	3234	3218	5081	5027	4602	5150	6622	5171	7527	7772	7585	LOC18782611
18790020	722	754	721	2361	2388	1653	2913	2916	3415	3122	2378	2647	2097	1682	1922	2157	2035	2524	2621	2392	2542	3364	3509	2781	2310	2666	2412	2434	2284	2888	3073	3041	2493	3173	4218	3453	2735	3067	3131	3822	3795	3690	3416	4522	3236	3951	4552	4402	LOC18790020
18787695	2127	2324	2220	2287	2420	1064	3113	2358	3067	3017	2754	3197	3402	2972	3438	3239	3034	3704	2746	2724	2913	2884	3280	3399	3281	2977	3180	3425	3325	2823	3013	2852	2847	2849	2900	2848	3677	3020	3320	2310	2527	2247	2249	2261	2241	2133	2178	2084	LOC18787695
18789616	358	365	307	2218	2317	2140	3252	2648	3245	2868	2395	2218	3203	3465	3759	3078	3053	2954	2024	2002	2065	3000	3144	3958	2831	3152	3047	4245	3700	3623	2440	2619	2580	2960	3569	3274	4121	3493	3770	2773	2668	2409	2434	3331	2277	2940	2994	2926	LOC18789616
18783684	5328	5125	5090	2572	2579	2817	2703	2444	2889	3292	3496	3452	3311	2743	2946	2748	2512	3130	2514	2692	2792	2542	2778	2509	2884	2607	2623	2728	2589	2683	3007	2873	2500	2926	2594	2269	2806	2338	2591	2418	2275	2837	1942	1768	2201	1891	1897	1924	LOC18783684
18790220	3159	2655	3016	3128	2904	2038	2795	2768	3153	2928	2532	2871	2376	1919	2220	2083	1956	2537	2300	2324	2989	2158	2590	2054	2124	2250	1860	2611	2121	2416	2599	2816	2518	2704	2424	2406	3253	3091	3027	3508	3376	3529	3694	4041	3569	4306	4232	4072	LOC18790220
18789310	3614	3555	3825	2673	2780	2822	3283	3129	3107	3230	2848	3039	3235	3017	3222	2939	2592	3185	2471	2331	2472	2353	2584	2572	2173	2218	2161	2593	2258	2553	2499	2436	2282	2338	2574	2503	2769	2847	2976	3040	2833	3064	2626	2672	2499	3224	2853	3090	LOC18789310
18780359	3082	3003	2969	2350	2357	1916	3031	2421	2921	3491	2952	3468	3287	2634	2984	2780	2766	3299	2308	2205	2475	2468	2653	2625	2505	2624	2547	3217	2434	2847	2766	2600	2630	2997	2801	2571	3169	2957	3320	3018	3087	3047	2840	2886	3049	2488	2590	2458	LOC18780359
18792190	3654	3959	4151	2559	2580	1896	2626	2499	2942	2948	2554	2866	2845	2773	2975	2786	2528	3017	2917	2869	3145	2937	3054	2860	2618	2657	2486	3041	2692	2852	2897	2538	2577	2792	2765	2499	2984	2855	3066	2884	2764	2847	2254	2318	2121	2375	2521	2478	LOC18792190
18792279	4520	4288	4450	2598	2451	1084	2662	2231	2783	2699	2302	2790	2839	2705	2816	2590	2410	2953	2631	2517	3054	2454	2715	2357	2429	2434	2126	2693	2279	2638	2700	2776	2448	2929	2721	2566	3685	3057	3069	2973	2866	2814	2445	2868	2712	3098	3286	3282	LOC18792279
18778158	3716	3475	3174	3200	2860	2677	2737	2592	3003	2915	2429	2989	2538	2059	2461	2198	2209	2696	2219	2221	2848	2249	2561	2123	2117	2174	2090	2638	2198	2385	2619	2785	2369	2963	2480	2319	3208	3096	3235	3407	3263	3225	3441	3770	3543	3203	3472	3471	LOC18778158
18788067	3527	3611	3793	3028	2964	5270	3141	3192	3417	3643	3007	3002	2881	2721	2709	3001	2407	2995	2574	2558	2517	2637	2663	2477	2377	2290	2163	2760	2329	2785	2514	2473	2227	2532	2660	2344	2394	2661	2712	2501	2505	2461	2385	2519	2565	2540	2521	2560	LOC18788067
18772777	3080	2691	2938	3262	3044	1362	2053	2094	2504	1732	1489	1879	1772	1460	1862	1499	1459	1695	3210	3529	3715	2434	2707	2118	1868	1811	1889	2200	1939	2257	2504	2466	2157	2371	2846	2227	3080	3410	3576	4268	4188	3946	4063	4670	4025	5376	5436	5344	LOC18772777
18774333	3695	4083	3839	2439	2467	1629	2551	2021	2610	3426	3559	3426	3300	2733	3182	2631	2442	2818	2444	2249	2804	2678	2725	2914	3180	3079	3399	3322	3088	2950	2887	3002	2671	3222	2673	2600	3447	2443	2801	2590	2340	2841	1788	2043	2120	2073	2168	2098	LOC18774333
18774012	4217	3884	3984	2667	2613	1651	2662	2615	2963	2278	1837	2042	2453	2058	2202	2172	2026	2725	2255	2329	2748	2526	2710	2193	2152	2147	2058	2624	2162	2560	3064	2909	2508	2688	2896	2312	2914	3091	2807	3309	3450	3207	3617	3796	3716	3968	3871	3850	LOC18774012
18771295	3220	2944	2912	2609	2476	2548	2849	2441	3003	3035	2379	2648	2814	2593	2642	2534	2678	3152	2369	2288	2522	2480	2684	2645	2136	2388	2235	3061	2654	2845	2749	2696	2453	2738	2893	2522	3086	3297	3468	3195	3188	2976	3131	3444	3096	2791	3020	2916	LOC18771295
18771672	3299	3141	3080	2440	2441	1422	2422	2060	2487	2814	2573	2930	2792	2234	2741	2399	2458	2866	2394	2388	2703	2462	2732	2712	2546	2572	2727	3001	2535	2737	2714	2718	2472	2952	2956	2668	3141	3399	3734	3547	3448	3272	3217	3336	3430	2681	2831	2792	LOC18771672
18792821	2528	2736	3268	2428	2876	2423	2935	2245	2652	3414	3599	3826	3252	3118	3190	2628	2213	2664	2697	2584	2532	2977	2888	3192	3144	2678	2882	3059	2665	2666	2468	2522	2389	2936	2324	2532	2120	2728	3047	2843	2567	2921	2092	2397	2244	3214	2949	3132	LOC18792821
18788079	3173	3328	3340	2553	2461	1878	2627	2186	2678	2928	2506	2740	3040	2487	2944	2737	2564	3085	2498	2512	2709	2646	2847	2704	2714	2650	2569	2837	2558	2759	2789	2713	2379	2849	2981	2620	2981	2711	2872	3041	2961	2895	2624	2920	3053	3176	3180	3332	LOC18788079
18790907	3847	3959	3984	2487	2538	2083	2758	2512	2810	2869	2455	2654	3010	2597	3063	2952	2717	3022	2480	2387	2575	2724	2840	2808	2556	2583	2455	2866	2478	2664	2829	2698	2516	2733	3037	2450	2905	3071	3110	2936	2899	2768	2460	2878	2344	2603	2610	2637	LOC18790907
18783779	4184	4836	4830	2033	2299	1780	3186	1901	3020	3108	3687	3477	4135	4106	4656	3465	2801	3076	2423	2261	2449	2803	2805	3612	3888	3400	3888	3429	3397	2729	2586	2476	2572	3429	2313	2714	2675	2077	2955	1748	1438	1837	929	965	1191	1309	1219	1088	LOC18783779
18793279	2047	2029	1892	4124	3867	3276	2954	3481	3587	3122	2133	2354	2089	1850	2077	2247	1801	2331	3065	2872	3306	2781	2735	2471	1809	1714	1692	2175	1746	2268	2838	2561	2418	2448	2705	2044	2704	3178	2979	4099	3757	3378	2824	4005	3045	3908	4304	4067	LOC18793279
18789134	3083	2337	2860	2583	2573	713	2218	1985	2341	2280	2152	2617	2065	1570	2196	1820	1769	2073	2345	2380	2973	2031	2748	1984	1942	2052	2000	2543	2228	2273	2487	2861	2344	2667	2463	2082	3583	3044	3201	3614	3437	3114	3908	4818	4314	6167	6057	6238	LOC18789134
18789753	3304	3348	3197	2677	2508	2842	3198	3229	3394	3156	2595	3037	3202	3166	3088	2843	2676	3047	2924	2967	3278	2752	3042	2959	2554	2596	2509	2870	2742	2918	2704	2568	2573	2562	2898	2478	3471	2769	2861	2513	2521	2299	1995	2211	1846	2013	2084	2149	LOC18789753
18781302	4198	3577	3868	2222	2207	683	2017	1583	2154	2068	2303	2808	2461	1920	2659	2312	2196	2324	2679	2515	2817	2212	3114	2197	2389	2278	2231	3078	2773	2754	2746	3108	2511	3044	2822	2190	3667	3003	3171	2943	3022	2730	2590	3333	3770	4658	4409	4770	LOC18781302
18767041	2707	2698	2610	3482	3301	2215	3254	3430	3796	3384	2672	3345	2782	2392	2606	2687	2597	3317	3122	3163	3564	2770	2985	2456	2536	2543	2303	2762	2244	2706	3197	3052	2886	2724	2750	2238	2541	3084	3000	2695	2755	2676	2195	2202	2240	2046	2175	2170	LOC18767041
18769652	2137	1932	1813	2163	2426	1550	3489	2391	3060	2732	2887	2658	4152	4104	4132	3243	3180	3826	2418	2010	2422	3582	3606	4066	2933	3324	3084	4599	3676	3683	3494	3284	3723	2630	2651	2816	3128	3663	3810	2270	2091	2303	1064	1761	984	666	808	523	LOC18769652
18790403	4331	4607	5055	2749	3411	1213	3622	1859	2904	3248	4277	4713	4042	3439	3862	3752	3265	3684	3295	2784	2955	2618	2772	3409	3604	3429	3777	3588	3385	2710	2722	2839	2903	2974	2045	2373	1519	2519	3372	1293	1378	1254	544	905	479	478	500	382	LOC18790403
18768170	7734	6303	6518	2610	2347	5557	4731	4427	4612	2727	1906	1586	4158	3719	3024	3697	3159	8645	648	974	757	4592	6345	2968	1071	2941	970	1447	1367	1983	4710	3492	2676	1675	1800	735	2167	1909	1372	1043	1838	982	1866	638	625	645	590	532	LOC18768170
18779771	3183	2919	3059	2350	2290	1351	2426	2240	2650	2567	2327	2665	2524	2219	2444	2120	2168	2624	2296	2378	2968	2359	2877	2207	2348	2345	2076	2678	2377	2469	2683	2760	2376	2893	2668	2278	3676	2799	2791	3367	3159	3053	3378	4114	3650	4573	4478	4535	LOC18779771
18778728	3079	2976	3002	2960	2798	1305	2304	2271	2541	2333	1968	2602	2273	1941	2310	2012	1947	2393	2769	2771	3434	2507	2740	2346	2213	2209	2054	2506	2045	2381	2747	2710	2284	2779	2844	2223	3807	3363	3413	3579	3581	3342	3514	3974	3536	3964	4043	4032	LOC18778728
18783828	2869	2701	2764	2864	2961	2222	2761	2459	2703	3267	2790	3009	3504	2837	3072	3203	2798	3513	3571	3310	2997	2989	3065	2911	2673	2568	2593	3091	2884	2954	2530	2419	2249	3686	3432	2835	2529	2935	3219	2390	2326	2425	1781	1931	2247	1847	1972	1918	LOC18783828
18774613	2977	3006	2936	2102	2417	1182	2467	2163	2520	3170	2735	3310	2986	2323	3008	2594	2608	3152	2324	2431	2782	2472	2853	2656	2536	2524	2569	2945	2529	2807	2609	2748	2338	3016	3165	2570	3282	2979	3250	3053	3050	3060	2941	3061	3089	2953	3149	3139	LOC18774613
18774274	4898	4942	4820	2842	2850	1437	2636	2325	2967	3046	2799	3014	2987	2871	3155	2643	2638	3159	2543	2336	2664	2390	2814	2488	2422	2422	2252	2790	2381	2641	2703	2795	2338	2740	2502	2310	2736	2703	2994	2607	2411	2685	2218	2354	2389	2526	2654	2675	LOC18774274
18788512	2040	1999	1875	3462	3408	4256	2662	2845	3070	3482	2780	2723	2556	2290	2451	2351	1853	2269	2935	2943	3311	2664	2724	2487	2416	2385	2438	2761	2347	2669	2669	2580	2520	2419	2697	2231	2663	2944	3004	3474	3116	3082	2721	3254	2732	3269	3472	3202	LOC18788512
18787324	1591	1125	1324	4008	3428	3015	5092	5245	4822	6711	4394	5706	4004	3032	2751	2611	2962	5002	2920	3370	3291	2700	3336	2218	1957	2290	1967	2026	1816	2668	4475	3453	3076	1980	2233	1491	1762	1881	1556	1984	2224	1952	2214	1097	1168	872	846	815	LOC18787324
18773790	2661	2841	2625	2190	2222	2136	3285	2869	3035	3294	3027	3110	3624	3348	3635	3225	3021	3223	2545	2267	2411	2720	3033	3125	3081	3084	2981	3266	2868	2802	2628	2666	2692	2900	2877	2894	2913	2778	3114	2808	2690	2475	1576	2031	1967	1921	1888	1894	LOC18773790
18771769	3065	2946	3079	2521	2560	1852	2379	2172	2584	2595	2323	2696	2689	2236	2658	2327	2171	2744	2767	2771	3164	2604	2758	2546	2459	2487	2305	2824	2362	2567	2690	2515	2520	2890	2885	2498	3577	3108	3112	3382	3228	3191	2873	3236	3086	3343	3490	3393	LOC18771769
18790559	82	90	95	3536	3603	2953	1955	1548	1920	2540	2735	2592	2077	1413	2586	2125	1699	1944	4147	3669	4724	2556	2886	2623	2953	2852	2678	2778	2369	2454	1854	2357	1947	2251	2811	2484	3544	2761	3129	3654	3709	2926	4004	5365	3735	4582	4448	4280	LOC18790559
18771069	3139	3110	2792	2724	2668	1928	2440	2260	2594	2769	2702	3063	2895	2309	2630	2839	2517	2913	2446	2302	2924	2359	2600	2172	2162	2175	2147	2623	2246	2577	2652	2674	2321	2656	2877	2268	3243	3133	3247	3253	3422	3137	3060	3515	3359	3333	3287	3476	LOC18771069
18769955	3974	3861	4064	2352	2404	2438	2800	2284	2612	2777	2674	2970	3441	3072	3206	2978	2889	3485	2383	2221	2432	2819	2994	2749	2680	2817	2599	3197	2884	2917	2948	2700	2755	2917	2764	2565	2401	2886	2926	2775	2534	2682	1758	1965	1902	2138	2222	2087	LOC18769955
18772193	3352	3301	3102	3088	2963	3047	2254	2383	2632	2798	2362	2493	2133	1772	1997	1785	1763	2185	3140	3062	3704	2500	2879	2440	2226	2185	2044	2440	2059	2277	2665	2802	2171	2611	2912	2224	3379	2896	3097	3398	3661	3145	3253	3454	3174	3495	3684	3501	LOC18772193
18776513	2579	2548	2587	2208	2399	650	2165	1964	2308	2638	2290	2725	2626	2105	2504	2235	2412	2722	2353	2522	3185	2337	2638	2418	2383	2264	2350	2788	2435	2792	2711	2888	2441	2947	2919	2398	4327	3268	3510	3514	3554	3445	3517	3485	3549	3763	3770	3634	LOC18776513
18777055	573	1263	696	1140	1079	439	5542	2953	3304	1821	1443	1864	7728	9597	7553	5933	5352	6625	1666	1431	1568	4676	4106	6999	1852	2447	2964	5742	5530	4398	2551	3843	3201	1291	1067	1508	2419	2840	2952	417	315	358	122	256	68	77	65	75	LOC18777055
18772869	4836	4913	4814	2250	2335	1654	2817	2187	2796	3333	3097	3288	3364	3357	3423	2840	2682	3108	2658	2420	2703	2558	2763	2823	2758	2550	2671	2950	2651	2718	2603	2492	2333	3038	2650	2457	2689	2485	2782	2368	2151	2384	1810	1912	1918	2074	2104	2130	LOC18772869
18792253	2199	2182	2194	2355	2406	2739	3088	2881	3111	2888	2615	3035	3104	2786	2843	3214	2797	3165	2397	2264	2568	2518	2627	2484	2295	2433	2305	2785	2342	2759	2502	2710	2537	2542	2916	2342	3222	3099	3089	3251	2993	3106	2585	3039	2602	3226	3373	3166	LOC18792253
18780611	3685	3485	3701	3124	3176	5550	3058	2602	2892	2914	2651	3053	2739	2591	2578	2513	2071	2954	2727	2669	2855	2606	2937	2527	2219	2275	2317	2544	2283	2321	2731	2772	2458	2348	2222	2162	2280	2421	2517	2703	2798	2691	2351	2637	2436	2886	2815	2822	LOC18780611
18772142	13555	15829	17200	4623	4466	1929	1654	1635	1814	3625	3186	3713	2344	1778	2087	1801	1466	1954	2804	2650	2859	1796	1667	1501	1526	1202	1153	1213	1173	1231	1398	1495	1208	1396	1159	1024	1483	1209	1433	1647	1273	1663	1297	1190	1711	1852	2013	1772	LOC18772142
109947199	3440	2716	3973	4888	4074	6456	5219	5010	5167	3232	2104	3090	3553	2733	2191	3120	2576	4041	1819	2099	1752	3011	3981	2411	1799	2529	1680	2329	2171	2593	3804	3469	3521	2226	1911	1911	1097	2686	1808	2095	2044	1571	1129	1064	999	1563	1366	1557	LOC109947199
18771888	4059	3599	3527	3188	3073	3035	2805	2922	2911	3136	2627	2937	2746	2279	2538	2418	2375	2994	2800	2784	3229	2570	2753	2359	2324	2459	2355	2513	2187	2544	2775	2566	2425	2576	2852	2276	3091	2695	2892	2812	2843	2908	2397	2574	2351	2465	2510	2509	LOC18771888
18784365	2636	2524	2883	1836	1923	1188	2351	1936	2280	2509	2477	2960	2810	2420	2872	2664	2441	2892	2404	2358	2373	2649	2891	2560	2576	2622	2592	2874	2635	2610	2813	3022	2685	3016	2949	2622	2521	2872	3129	3335	3186	3029	2632	3261	3097	4323	4087	4232	LOC18784365
18783877	3625	3579	3356	2858	2834	1882	2987	2772	3281	2994	2776	2922	2938	2569	2890	2836	2582	3167	2707	2808	2628	2721	2784	2631	2418	2522	2400	2724	2399	2660	2742	2850	2413	2668	2711	2333	2444	2800	2779	2830	2870	2695	2307	2504	2441	2478	2551	2647	LOC18783877
18773569	4251	3757	4004	3212	3266	3768	2839	2677	3113	2625	2554	2659	2235	1891	2064	1718	1586	2075	3179	3328	3564	3073	3067	2788	2946	2701	2466	3039	2693	3013	3291	3242	2979	2541	2861	2531	2779	2652	2720	2765	2588	2375	1942	2163	2065	1822	1955	1870	LOC18773569
18785542	3398	3488	3337	2698	2655	3255	2662	2526	3037	3075	2896	3064	3093	2498	2988	2723	2516	3118	2572	2623	2592	2657	2846	2623	2396	2623	2529	2925	2390	2735	2682	2729	2439	2697	2909	2454	2729	2779	2932	2872	2709	2760	2218	2453	2394	2370	2319	2288	LOC18785542
18774962	764	918	894	1242	1778	1295	3107	2144	2518	4981	6356	5731	5028	4075	4562	3076	2872	2995	2375	2148	2577	3185	2681	3112	4348	3146	3296	3282	2849	2780	2681	2918	2791	2322	2776	2656	2852	2338	2840	3690	3131	3705	1121	931	1566	809	952	951	LOC18774962
18770670	3182	3128	2907	2739	2779	2568	3031	2745	2986	2878	2478	2751	2874	2603	2579	2817	2647	3300	2733	2491	2914	2622	2916	2689	2314	2519	2233	2790	2381	2838	2779	2743	2483	2742	2983	2545	3206	2872	2875	3016	2854	2876	2236	2333	2366	2661	2521	2592	LOC18770670
18785478	2536	2803	2638	2469	2422	2461	2219	2105	2424	2826	2492	2393	2782	2206	2381	2691	2518	3059	2751	2622	2885	2747	3108	2314	2396	2320	2268	2851	2480	2938	2780	2559	2312	3133	3187	2305	3226	2718	2946	3170	3259	3018	2932	3160	3499	3219	3135	3355	LOC18785478
18772021	6915	6576	7136	2474	2517	2150	2420	2235	2499	2517	2178	2379	2448	2089	2081	2232	1973	2900	2568	2804	2965	2356	2540	2195	1858	1842	1709	2274	2212	2449	2908	2923	2242	2243	2335	1892	2612	2425	2364	2993	2968	2897	2792	3004	3051	2515	2723	2630	LOC18772021
18787162	4731	4355	4345	2964	2914	3379	2409	2725	2965	3052	2376	2543	2343	1898	1966	2346	2011	2893	2510	2658	2894	2633	2812	2452	1953	1889	1727	2208	1920	2389	2406	2329	1858	2571	3129	2157	3093	2714	2687	3086	3349	2948	3026	2997	3388	3038	2912	3009	LOC18787162
18770892	1533	1447	1593	2014	2194	2588	2769	2263	2703	2581	2451	2810	2986	2306	2626	2634	2641	3412	2635	2364	3330	2806	3213	2489	2208	2265	2183	2890	2361	2635	3365	3113	2844	2786	3065	2300	3568	2871	2676	3491	4211	3102	3364	3178	3261	2982	2975	2870	LOC18770892
18786330	2596	2666	2891	2287	2345	1068	2961	2656	3166	2355	2463	2762	2930	2451	2869	2626	2419	3019	2711	2643	3265	2833	3149	3009	2623	2627	2548	2942	2584	2726	3087	3128	2739	2713	2501	2265	3315	2817	3152	2937	2888	2591	2308	3142	2485	2827	2931	2860	LOC18786330
18768654	1226	1024	1133	2067	2271	2292	2296	1958	2156	2556	2593	2841	2647	1946	2317	2488	2627	3256	2450	2071	2877	2353	2650	2289	2255	2248	2103	2679	2505	2546	2826	2910	2443	2967	2991	2706	4273	3219	3694	4217	4319	3979	3297	3620	3510	3813	3765	3592	LOC18768654
109950176	3252	2633	2888	2320	2625	1008	3882	2027	3030	2547	3068	3280	3794	3906	4091	3683	3400	3856	2641	2508	3009	2778	3478	3720	3661	3629	3595	3871	3613	3170	3070	3111	3218	2560	2450	2569	2770	3313	3577	1669	1700	1562	809	1196	715	422	588	453	LOC109950176
18789212	472	583	641	2281	2614	1828	2951	2286	2699	3034	3239	3153	3886	3668	4102	3751	3267	3677	3034	2532	2659	3034	3409	3489	3243	3036	2967	3836	3336	3149	2530	2792	2651	2955	2766	2929	2448	2911	3064	2723	3023	2419	2076	2335	2001	1714	1910	1604	LOC18789212
18767566	3093	2533	2687	3029	3183	1890	2819	2694	3138	2794	2555	2729	2724	2302	2636	2326	2281	2741	2946	2884	2359	2612	2906	2682	2450	2346	2444	2648	2552	2685	2821	2792	2383	2695	2582	2606	1717	2919	3093	3271	3394	3282	2775	2963	2658	2953	3067	2965	LOC18767566
18784983	2194	2082	2156	2931	2776	2874	2505	2591	2783	2650	2347	2538	2286	1794	2129	2161	1930	2530	2791	2972	3176	2720	2697	2442	2233	2319	2077	2492	2026	2386	2911	2835	2453	2447	2769	2295	2544	2769	2915	3515	3793	3536	3547	3665	3522	3723	4023	3677	LOC18784983
18771060	6341	4861	5591	5222	4853	6245	3197	3244	3430	3795	2992	3993	2762	2331	2381	2489	2181	3124	4600	4404	5605	2777	2894	2520	1617	1872	1802	2263	2015	2196	2444	2050	2269	1512	1919	1671	2052	2079	1824	1352	1092	1064	788	998	717	1048	1011	1026	LOC18771060
18783468	2440	2736	2559	2009	2197	1362	2802	2094	2712	3078	2940	3022	3866	3465	3823	3499	3321	3733	2671	2375	2590	2820	3309	3314	3031	2882	2871	3438	3146	3076	2702	2501	2463	3271	3157	2771	3599	2868	2983	2116	2102	2105	1737	1664	2000	1688	1853	1713	LOC18783468
18782614	2745	2746	2561	2491	2582	1347	3006	2591	2865	3130	3149	3352	3378	3007	3285	2995	2773	3257	2745	2636	2861	2897	2724	2899	2902	2819	2725	3042	2951	2734	2747	2701	2651	2686	2979	2762	2489	2773	3004	2727	2660	2690	1998	2053	2151	2027	2043	2058	LOC18782614
18776881	2243	2342	2180	4946	4414	6899	2800	3020	3447	2387	1965	2140	1588	1355	1765	1737	1499	1984	3064	3264	3941	2416	2425	1966	1741	1571	1557	1707	1575	1704	2220	2152	1942	1949	2159	1497	2939	2474	2325	2909	3115	3101	3581	3490	3516	5149	5160	5026	LOC18776881
18767951	2557	2606	2545	2942	2739	2315	2879	2806	3015	2966	2661	2762	2586	2356	2462	2295	2199	2610	2926	2769	3200	2524	2755	2682	2464	2414	2360	3104	2546	2810	2901	2629	2400	2821	2892	2454	2890	3081	3203	3028	3158	2805	2732	3165	2672	2619	2561	2460	LOC18767951
18769134	10955	8305	9749	7379	7162	7938	2199	2372	2011	2610	2425	3152	1394	1132	1381	1216	882	1322	5793	7070	7768	1828	1885	1660	1169	1286	1202	1278	1079	1370	2043	2040	1947	974	1062	1051	2041	2093	1857	1244	1047	1033	707	1162	798	691	797	727	LOC18769134
18778170	2613	2618	2686	2264	2393	1371	2721	2275	2687	3045	3170	3125	3479	2967	3382	3105	2951	3465	2662	2319	2594	2788	2821	2988	2739	2811	2709	3114	2798	2795	2826	2774	2513	3165	2973	2803	2980	2749	3129	2806	2628	2747	1855	2042	2197	2133	2196	2236	LOC18778170
18773513	2927	3123	3292	2785	2885	1914	3011	2064	2754	3590	4101	4148	3830	3568	3811	3085	2620	3180	3015	2549	2782	2954	2961	3071	3254	2636	2897	2808	2508	2405	2484	2259	2411	2788	2198	2240	1881	2215	2675	2547	2302	2603	1522	1595	1866	1966	2114	1989	LOC18773513
18783935	422	494	455	711	875	411	1563	1455	1288	1545	1359	1410	2948	2820	2941	2918	2881	3404	1983	1434	2115	2979	3464	3017	2587	2703	2806	4934	3710	4924	3252	3138	3225	2339	2761	2342	3733	3836	4354	5401	4551	4026	3059	4589	2868	3272	3474	3325	LOC18783935
18782744	1992	1829	1917	2007	2324	2185	2415	2204	2449	2893	2454	2758	3036	2504	2582	2754	2797	3204	2519	2149	2515	2428	2935	2705	2300	2456	2270	2791	2524	2870	3233	3028	2759	3157	3411	2857	3621	3244	3177	2979	3312	3190	2535	2448	2999	3296	2964	3107	LOC18782744
18769736	3149	3075	2973	2699	2669	1595	2242	2133	2433	2559	2368	2349	2489	2087	2499	2261	2125	2472	2769	2976	2998	2379	2777	2305	2278	2190	2184	2577	2243	2559	2771	2712	2385	2459	2621	2110	2596	2984	3126	3328	3259	3296	3096	3538	3249	3907	4081	4101	LOC18769736
18785354	2961	2820	2754	3205	2979	3671	3039	3007	3235	3088	2254	2306	2766	2528	2724	2769	2477	3045	2638	2458	2715	2624	2842	2567	2230	2219	2167	2520	2462	2713	2845	2529	2440	2911	2963	2429	2898	2785	2653	3047	2847	2719	2274	2807	2414	2473	2608	2602	LOC18785354
18767061	1419	1210	1409	2656	2740	3600	2986	2547	2915	2607	2203	2461	2441	2263	2452	1993	1840	2691	2764	2609	3015	2906	3453	3311	2608	2966	2725	3256	3007	2781	3527	3339	3161	2930	3107	2944	3002	3363	3392	2786	2802	2486	2235	2531	2001	2973	2868	2740	LOC18767061
18767580	2345	2713	2593	2403	2611	1556	2679	1959	2605	3575	4121	3830	3265	2898	3526	2494	2320	2555	2699	2523	2824	2711	2625	2610	3310	2675	3023	3046	2729	2791	2684	2632	2565	2826	2376	2275	3393	2620	2862	2809	2536	3153	2010	2188	2325	2587	2276	2208	LOC18767580
18793319	1213	1239	1311	4159	3684	3226	2239	2703	3173	1832	1610	1970	1183	926	1235	1131	926	1410	2955	3170	3034	2357	2343	1884	1525	1486	1477	1557	1395	1732	2265	2335	1827	2151	2496	1808	2253	3092	2999	4641	4732	4419	5242	5722	4659	6678	6228	6280	LOC18793319
18771398	2730	2662	2575	3336	3252	2807	2638	2796	3105	2814	2277	2658	2185	1737	2053	1993	1724	2463	2857	2896	3259	2513	2582	2119	1907	1895	1949	2200	1882	2421	2507	2466	2075	2503	2903	2116	2774	2719	2451	3308	3347	3191	3887	3669	3721	3872	4200	3914	LOC18771398
18772650	6647	8120	8053	1593	1624	1958	3354	1524	2005	2014	2003	1637	3092	2787	3089	4847	3977	4610	4337	5160	3601	3520	3750	3651	2338	2554	2454	2769	2529	2801	2417	2508	2027	2439	2311	2180	1943	1556	1755	1386	1063	1233	731	793	793	780	857	676	LOC18772650
18766331	4159	4240	4335	2998	3093	2958	2621	2384	2786	3585	3255	3279	2628	2323	2728	2334	2193	2587	2387	2305	2927	2323	2460	2379	2698	2398	2598	2747	2336	2612	2714	2893	2465	2592	2489	2297	3054	2532	2690	2684	2495	2837	2077	2133	2279	2319	2408	2223	LOC18766331
18767360	4223	4422	4033	3136	3105	2364	2734	2621	2880	3067	2534	2857	2838	2684	2730	2736	2437	2966	2371	2289	2759	2299	2538	2416	2096	2118	1995	2610	2251	2469	2547	2402	2281	2428	2451	2168	2781	2490	2623	2707	2686	2594	2678	2832	2624	2908	2962	2993	LOC18767360
18787965	4094	4276	4309	2017	2033	1303	2702	2179	2642	2945	2951	3121	3359	2988	3408	2900	2819	3429	2389	2127	2368	2642	3015	2985	2947	2815	2920	3308	2914	3022	2721	2746	2482	2969	2838	2599	2784	2661	2766	2426	2237	2324	1805	1915	1894	1806	1884	1871	LOC18787965
18770420	3010	3110	3203	2181	2752	2052	3241	2216	3124	3493	3920	3536	3754	3671	3904	2896	2782	2997	2356	2082	2262	2798	2773	3211	3340	3065	3420	3368	3147	2772	2690	2695	2776	2830	2570	2751	2736	2334	2721	1996	1849	2256	1250	1398	1594	1622	1578	1529	LOC18770420
18780029	3245	3215	3450	2387	2204	1244	2413	2154	2360	2338	2398	2675	2879	2520	2497	2699	2600	3054	2870	2597	2629	2646	2889	2681	2477	2368	2331	3160	2729	3055	2937	2999	2697	2677	2660	2559	2578	2830	2875	2768	2863	2592	2438	2868	2680	3212	3269	3258	LOC18780029
18767888	3116	3280	3364	2196	2284	4234	2985	2652	2914	3229	3014	2962	3415	3063	3424	2857	2804	3376	2291	2199	2426	2709	3086	2865	3033	2945	2816	3036	2869	2699	2770	2736	2612	2907	2759	2575	3094	2608	2843	2120	2209	2286	1604	1685	1713	1557	1601	1555	LOC18767888
18770862	3366	3215	3258	2677	2570	1772	2656	2386	2861	2889	2714	2717	2742	2307	2660	2550	2495	2929	2392	2478	2716	2340	2643	2385	2382	2341	2396	2677	2300	2663	2648	2569	2284	2604	3001	2355	2833	2721	2995	2832	2808	2666	2667	3003	2956	3209	3294	3433	LOC18770862
18790166	3502	3417	3342	2978	2887	3653	2677	2734	3055	2859	2268	2638	2327	2032	2225	2160	2040	2717	2823	2699	2900	2724	2985	2356	2214	2085	2151	2348	2103	2481	2908	2928	2357	2692	2668	2038	2613	2785	2724	3126	3319	2935	2706	2813	2634	2827	2945	2909	LOC18790166
18792436	2693	2660	2963	3525	3426	3580	2421	2242	2502	3467	3332	3521	2693	2257	3035	2146	1991	2111	3199	3029	3754	2695	2753	2729	2700	2498	2478	2589	2213	2416	2357	2645	2429	2165	2293	2163	2624	2726	2948	3252	2884	2869	2421	2582	2332	2395	2377	2189	LOC18792436
18782887	3062	2840	2811	2587	2809	1218	2554	2323	2847	2918	2419	2903	2596	2065	2477	2127	2119	2583	2412	2420	2942	2249	2674	2233	2186	2297	2195	2675	2258	2534	2634	2534	2348	2846	2923	2607	3814	3268	3452	3233	3489	3195	3064	3408	3091	2855	3079	3034	LOC18782887
18770000	3991	3409	3748	2186	2341	1682	2572	1943	2491	2603	2510	2763	2970	2598	2901	2556	2512	3055	2751	2525	2659	2513	2977	2592	2590	2642	2515	2877	2620	2698	2737	2738	2439	3015	2730	2570	2514	2899	3254	3033	3036	2819	2270	2636	2441	2337	2562	2358	LOC18770000
18767510	2525	2547	2715	2697	2878	1670	2904	2432	2868	2969	2818	2944	2891	2665	2841	2602	2340	3117	2611	2632	2710	2660	2905	2574	2487	2734	2532	3048	2648	2848	2880	2826	2530	2585	2682	2459	2573	3006	3068	2996	3013	2727	2420	2680	2516	2492	2587	2308	LOC18767510
18788863	3011	3492	3854	1739	1798	2424	2870	2257	2986	2144	1740	1886	2674	2466	2430	2641	2282	3692	2193	2121	2515	3500	4067	3384	2063	2574	2061	2362	2218	2581	3114	2719	2392	2857	3288	2462	4961	2794	2722	2834	2728	2701	2640	2587	2588	2316	2706	2683	LOC18788863
18772748	2778	3136	2543	2886	2971	1891	3249	2534	3404	3616	4117	3893	3661	3187	3858	2692	2444	2486	2687	2445	2359	2770	2782	2739	3178	2825	2956	2594	2738	2524	2515	2409	2380	2469	2358	2270	2753	2284	2542	2651	2128	2542	1636	1887	1880	2111	2198	2140	LOC18772748
18783720	3813	4272	4352	2163	2309	2323	2526	2224	2515	2607	2535	2439	3202	3227	3498	3234	2969	3034	2926	2144	2387	2363	2715	2721	2565	2568	2390	3322	3137	3136	2200	2320	2297	2990	2743	2570	2989	2796	3412	2448	2229	1920	2197	2286	2335	1999	1956	1775	LOC18783720
18777762	4818	4482	4634	2398	2579	1832	2794	2291	2879	2800	2671	2905	3007	2638	3110	2816	2708	3368	2527	2408	2681	2558	2724	2499	2429	2543	2536	2854	2529	2715	2638	2700	2418	2886	2663	2452	2736	2538	2939	2493	2502	2400	1946	2054	1946	1912	2074	1993	LOC18777762
18788085	3880	3792	3921	2196	2285	2953	2521	1972	2743	3071	2862	2955	3356	2862	3357	2924	2922	3256	2441	2367	2652	2531	2716	2729	2728	2695	2710	2965	2544	2718	2519	2638	2297	2904	2817	2300	2864	2667	2981	2491	2184	2351	1829	2004	2142	2041	2230	2064	LOC18788085
18785344	2113	2170	2558	3406	3271	4018	3120	3376	3468	3276	2580	2963	2310	2024	1978	1887	1525	2504	2463	2370	2966	2566	3021	2271	2101	2159	1974	2443	2343	2603	3112	3014	2861	2316	2721	2059	3292	2705	2434	3032	2988	2668	2718	2698	2425	3621	3125	3309	LOC18785344
18766425	1546	1666	2229	3256	2607	2457	2950	1809	2601	3412	4017	3094	2989	3184	3100	3079	2254	3604	4177	3410	5214	3275	3044	2498	2950	2264	2548	2781	2725	2080	2611	2471	2378	2633	2058	2649	3273	2424	2973	1900	2371	2651	1608	2115	1632	2501	1801	1958	LOC18766425
18790120	715	615	590	3406	3193	3188	3785	3555	4341	2674	1969	2184	1969	1503	1681	2682	2151	2723	2330	2497	2628	2501	2484	1771	1692	1802	1806	2212	1827	2459	2892	2510	2333	2668	3057	2080	2510	2610	2620	3667	3751	3213	3759	4465	3746	4507	4843	4582	LOC18790120
18790952	2623	2880	2725	1932	2387	1734	2289	1980	2146	2025	2173	1838	3800	3532	4215	3097	2770	2623	3443	2515	2534	2328	2637	2953	2637	2689	2595	3477	3488	3380	2158	2208	2298	3131	3185	3734	2860	2718	2942	2654	2863	2479	2273	2434	2179	2483	2468	2230	LOC18790952
18792876	1980	1914	1916	2720	2702	2206	2623	2625	3048	2679	2127	2495	2269	2205	2273	2528	2300	2715	2698	2745	3033	2416	2693	2324	2248	2271	2076	2626	2280	2597	2726	2673	2273	2724	3211	2360	2974	3034	3143	3317	3451	3087	3106	3513	3062	3453	3660	3610	LOC18792876
18791545	3018	2878	2887	2472	2477	1761	2651	2278	2699	3075	2725	3109	3052	2452	2812	2661	2473	3178	2387	2423	2906	2675	2773	2394	2304	2371	2386	2857	2347	2659	2786	2664	2460	2500	2721	2078	3113	2640	2753	2950	2881	2874	2651	2912	2728	2727	2903	2716	LOC18791545
109946706	3037	3192	3631	2318	2372	2650	2970	2105	2730	3046	3424	3396	3628	3546	3840	2987	2665	3020	2662	2413	2644	2732	2769	3247	3422	2890	2853	3052	2861	2555	2400	2682	2454	2722	2173	2583	2130	2211	2733	2356	1967	2318	1491	1576	1635	2026	2036	1995	LOC109946706
18776896	4337	3633	3824	2568	2408	2661	2548	2217	2634	2696	2533	2890	2775	2249	2601	2421	2339	2802	2757	2682	2744	2599	2909	2459	2338	2465	2320	2716	2382	2642	2776	2725	2487	2768	2827	2395	2196	2933	2900	2762	2762	2591	2428	2440	2552	2409	2494	2503	LOC18776896
18779015	2646	2768	2534	3322	2988	4229	2649	2575	2757	2937	2295	2439	2447	2227	2553	2366	2480	2810	2808	2567	2752	2641	2675	2588	2129	2159	2210	3093	2468	2740	2819	2743	2429	2570	2944	2565	2650	2946	3262	2746	2788	2489	2589	2882	2526	2537	2348	2356	LOC18779015
18787435	3651	3960	3422	2873	2965	3064	2192	2240	2506	2234	2124	2018	2189	2272	2618	2154	1975	2409	2706	2503	2730	2907	2957	2726	1983	2305	2187	3137	2579	3115	3069	3062	2510	2033	2384	2103	3399	2993	3113	3426	3297	2834	2971	2846	1969	2448	2568	2252	LOC18787435
18778626	1958	1744	1924	1836	2006	2022	2910	2928	2918	3963	3818	4274	3230	2415	2598	2111	2283	3633	2341	2330	2345	2644	3010	2623	2856	2579	2481	2566	2145	2702	3013	2865	2597	2841	3124	2703	3085	3045	3036	3572	3166	3482	2274	2304	2146	1808	1775	1915	LOC18778626
18771161	3254	3153	3166	2390	2410	1537	2421	2139	2627	2696	2229	2694	2728	2234	2641	2531	2327	3064	2499	2339	2553	2379	2623	2356	2160	2280	2217	2690	2192	2454	2454	2574	2245	2726	2570	2252	2773	2974	3091	3000	3022	2753	2967	3114	2897	3742	3875	3841	LOC18771161
18768030	58	30	95	7752	7876	6899	3057	2142	2398	3966	5614	6170	3775	2911	3728	3088	2585	3304	5829	4547	7681	2007	2224	3186	2440	3191	2730	2573	2368	1756	1934	1893	2278	1581	1166	1601	2661	2136	2268	1475	1122	1048	91	235	57	103	119	94	LOC18768030
18774889	1530	1453	1552	2917	2972	1245	3349	2652	3425	3086	3072	3128	3467	3363	3383	3522	2924	3610	2578	2283	2605	2669	3033	3418	3040	2914	2840	3191	2984	2526	2492	2555	2510	2536	2651	2714	3621	2512	2752	2193	2089	2165	1783	2367	1817	2095	2124	2075	LOC18774889
18774128	3734	4116	3941	2709	2628	3259	3202	2618	3234	3412	3024	3155	3500	3280	3922	3066	2950	3321	2274	2219	2384	2703	2708	3054	2565	2612	2630	3126	2754	2822	2334	2416	2300	2491	2421	2547	2370	2320	2457	2088	1863	1919	1416	1597	1493	1613	1632	1555	LOC18774128
18783122	2572	2341	2482	2274	2297	1829	2797	2036	2458	2985	2909	3120	3851	3824	4042	3441	2888	3602	2669	2194	2713	2559	2760	3285	3119	2814	2871	3188	2678	2676	2491	2424	2446	3035	2597	2681	3219	2541	3271	2284	2165	2379	1808	1577	1987	1967	1808	1747	LOC18783122
18788560	3065	2587	2773	2680	2950	1762	2584	2237	2689	2685	2691	2722	2611	2137	2720	2366	2246	2475	2683	2810	3047	2358	2648	2227	2365	2367	2420	2631	2305	2576	2778	2551	2438	2756	2822	2243	2351	2754	3114	3343	3328	3173	2804	3251	2931	2691	3085	2863	LOC18788560
18790874	2838	3336	3314	3429	3445	2819	2226	2248	2497	2967	2521	2720	2087	1653	1895	1944	1666	2035	4032	3747	3895	2764	2716	2412	2264	2446	2249	2259	1950	2287	2389	2217	2008	3149	3139	2823	2614	2787	2941	3155	3250	2695	2507	2744	2836	2489	2648	2602	LOC18790874
18772621	800	653	692	1987	2313	1551	4493	2342	3685	3323	4006	3602	5022	4642	5672	4514	4253	4077	2560	2027	2191	2960	3029	4021	3923	3522	3672	3821	3727	2788	2506	2500	2923	2960	2426	2813	2560	2321	2885	1247	1421	1269	731	924	656	512	594	502	LOC18772621
18778031	2268	2391	2323	1872	2108	1748	2752	2318	2731	3139	2726	2844	3133	2953	3409	3127	2784	3152	2314	2198	2743	2567	2937	3090	2943	3141	3148	3717	3357	3277	2627	2758	2413	3145	2898	2825	3063	2800	3346	2633	2515	2272	1639	2236	1652	1993	1840	1687	LOC18778031
18770183	745	880	758	5192	4325	5270	2519	3616	3568	2013	1457	1453	504	430	637	608	496	1082	2064	2919	2584	2211	2152	1756	1554	1245	1413	1076	917	1270	2127	2442	1394	2370	2792	1644	2391	2618	2422	4143	4371	4495	6424	6061	5031	6362	6831	6811	LOC18770183
[truncated: 25,490 more rows]
[truncated: 8 more columns]
